# Supplementary material for: Loss of the RNA trimethylguanosine cap is compatible with nuclear accumulation of spliceosomal snRNAs but not pre-mRNA splicing or snRNA processing during animal development
Source: PLoS Genet. 2020 Oct 21;16(10):e1009098. doi: 10.1371/journal.pgen.1009098 (PMC7605716; doi:10.1371/journal.pgen.1009098)
Supplement: S4 Table — (XLSX) [file pgen.1009098.s012.xlsx]

## Sheet: Sheet1
		5' splice site - IR ratio							3' splice site - IR ratio
Intron_loci	gene	wt-1	wt-2	mut-1	mut-2	fold_change (mut/wt)	delta	p_val	wt-1	wt-2	mut-1	mut-2	fold_change (mut/wt)	delta	p_val	GC% of intron	max_fold change	min_fold change	max_delta	intron_loci again	5'splice site sequence	3' splice site sequence	5' splice site score	3' splice site score	intron length
3L_17167046_17167109_FBgn0263381_+	CR43433	0.2	0.19	0.97	1.16	5.46	0.87	0.011746	0.3	0.23	3.83	5.4	17.42	4.35	0.031116	46.88	17.42	5.46	4.35	3L_17167046_17167109_FBgn0263381_+	TGGGTGAGT	GCCGAAGCCTCTGCAAGTAGATT	8.73	-2.41	63
2L_15026838_15029588_FBgn0260446_+	GABA-B-R1	0.24	0.42	3.44	3.6	10.67	3.19	0.001422	0.19	0.07	0.8	0.75	5.96	0.645	0.010004	38.42	10.67	5.96	3.19	2L_15026838_15029588_FBgn0260446_+	AAGGTAAGC	TTATAACATCTATAATCCAGGTT	10.22	4.47	2750
X_4782715_4782768_FBgn0029726_-	CG15471	2.42	2.14	4.82	4.63	2.07	2.445	0.004754	0.57	0.59	0.79	0.77	1.34	0.2	0.004963	33.33	2.07	1.34	2.445	X_4782715_4782768_FBgn0029726_-	ATCGTACGT	TTTTTTCACCCTTCACCTAGAAA	8.34	7.46	53
3R_21410651_21410702_FBgn0008651_-	lbl	0.33	0	2	2	12.12	1.835	0.007989	0.5	0	2	2	8	1.75	0.019804	32.69	12.12	8	1.835	3R_21410651_21410702_FBgn0008651_-	AATGTCAGC	ATGACTTGACTATTTTAAAGACC	-1.38	1.95	51
3L_21298705_21298788_FBgn0263841_+	CG43702	2.38	2.56	4.11	3.87	1.62	1.52	0.009599	0.69	0.69	0.76	0.76	1.1	0.07	0	40.48	1.62	1.1	1.52	3L_21298705_21298788_FBgn0263841_+	ATGGTATAT	CAATCCTTATGTATTTGCAGTGG	3.91	5.09	83
2L_8997669_8997722_FBgn0040964_+	CG18661	0.27	0.54	1.67	2	4.53	1.43	0.021511	0.29	0.29	0.82	0.79	2.78	0.515	0.000847	22.22	4.53	2.78	1.43	2L_8997669_8997722_FBgn0040964_+	GAGGTAAAT	TAAATGCAAAACAAACACAGCCT	8.39	-3.05	53
2L_7060768_7060831_FBgn0051907_-	CG31907	0.09	0.07	1.39	1.48	17.94	1.355	0.001155	0.08	0.06	0.6	0.62	8.71	0.54	0.000685	21.88	17.94	8.71	1.355	2L_7060768_7060831_FBgn0051907_-	TCGGTAAGA	AATTTTTGTTTCCTTTTAAGACC	10.53	7.41	63
2L_11143289_11143338_FBgn0010197_-	Gyc32E	0.07	0	1.5	1.2	38.57	1.315	0.013444	0.08	0	0.75	1	21.88	0.835	0.023826	28	38.57	21.88	1.315	2L_11143289_11143338_FBgn0010197_-	CAGGTGAGT	AATTACGATTTTTGAAACAGGAA	10.67	6.55	49
X_2080635_2080744_FBgn0040395_+	Unc-76	0.94	0.65	1.91	2.22	2.6	1.27	0.026813	0.3	0.3	0.72	0.69	2.35	0.405	0.001369	40	2.6	2.35	1.27	X_2080635_2080744_FBgn0040395_+	AAGGTAAGC	CTTTTTTGTTTGGTGTTTAGTGT	10.22	7.34	109
2L_15772404_15772462_FBgn0051826_-	CG31826	0.17	0.16	1.38	1.44	8.55	1.245	0.000596	0.13	0.13	0.73	0.82	5.96	0.645	0.004832	42.37	8.55	5.96	1.245	2L_15772404_15772462_FBgn0051826_-	AGAGTAAGC	GCCAGATGAAACTGTTTCAGAAT	6.31	2.66	58
2R_24969747_24969812_FBgn0035088_+	CG3776	0.33	0.29	1.5	1.56	4.94	1.22	0.000872	0.61	0.56	0.72	0.72	1.23	0.135	0.032625	27.27	4.94	1.23	1.22	2R_24969747_24969812_FBgn0035088_+	TTGGTATAT	AAACAAAAACAACTTTTTAGCCC	1.75	0.1	65
3L_14178493_14178568_FBgn0000411_-	D	0.04	0.07	1.5	1	22.73	1.195	0.041227	0.06	0.09	0.62	0.67	8.6	0.57	0.002606	28.95	22.73	8.6	1.195	3L_14178493_14178568_FBgn0000411_-	AAGGTTTGT	ACATCTTTTCTATAATAAAGCAC	7.81	3.15	75
2R_22704758_22704940_FBgn0034768_+	Obp58b	0	0	0.75	1	NA	0.875	0.019804	0	0	1	1.33	NA	1.165	0.019475	34.97	0	0	1.165	2R_22704758_22704940_FBgn0034768_+	TTGGTACGT	ATGTGCATATTTCTATGCAGAAT	8.11	7.92	182
3R_14641144_14641202_FBgn0038247_+	Cad88C	0	0	1	0.75	NA	0.875	0.019804	0	0	1.33	1	NA	1.165	0.019475	20.34	0	0	1.165	3R_14641144_14641202_FBgn0038247_+	TCCGTAAGT	AATACACAAATTCCATTTAGGTG	10.27	6.04	58
3R_28925802_28925912_FBgn0039617_-	DIP-gamma	0	0	1	1.33	NA	1.165	0.019475	0	0	1	1	NA	1	0	44.14	0	0	1.165	3R_28925802_28925912_FBgn0039617_-	ACGGTGCGT	CCTGTGGTTCTGTGTTGCAGAAA	10.25	10.15	110
3R_9784761_9785751_FBgn0037754_+	CG8500	0	0	1	1.33	NA	1.165	0.019475	0	0	0.8	0.83	NA	0.815	0.000339	45.01	0	0	1.165	3R_9784761_9785751_FBgn0037754_+	CAAGTAAAT	TTTGCTCTTAATTGTTGCAGATA	4.44	8.34	990
X_15641763_15641829_FBgn0266198_-	CR44893	0	0	1.33	1	NA	1.165	0.019475	0	0	1	1	NA	1	0	40.3	0	0	1.165	X_15641763_15641829_FBgn0266198_-	GCGGTCGAG	AATCTCTTCTCACGCCACAGATC	-9.09	7.63	66
3R_15802288_15802339_FBgn0038365_+	CG9593	0.14	0	1.2	1.25	17.5	1.155	0.004116	0.2	0.1	1.33	1	7.77	1.015	0.027661	53.85	17.5	7.77	1.155	3R_15802288_15802339_FBgn0038365_+	ATGGTAAGG	GATACTGACTCCCTTTCAAGAAG	9.33	3.96	51
2R_24401772_24401834_FBgn0035001_-	Slik	1.95	1.77	3.11	2.91	1.62	1.15	0.013411	0.87	0.89	1.01	1.04	1.16	0.145	0.015108	30.16	1.62	1.16	1.15	2R_24401772_24401834_FBgn0035001_-	TTCGTACGT	TTAAATTATAAAACATACAGAAC	6.44	1.92	62
2R_15557935_15558007_FBgn0034031_+	CG12963	0	0	0.67	0.75	NA	0.71	0.003159	0.03	0	1.2	1.12	77.33	1.145	0.001389	42.47	77.33	77.33	1.145	2R_15557935_15558007_FBgn0034031_+	CGAGTAAGT	ATCCCCTATTGACCCTGTAGGCT	10.15	7.7	72
2R_23547876_23547983_FBgn0034876_-	wmd	0.26	0.25	1.46	1.34	5.49	1.145	0.002754	0.47	0.38	0.93	0.93	2.19	0.505	0.007847	46.3	5.49	2.19	1.145	2R_23547876_23547983_FBgn0034876_-	TAGGTAGGT	CTCTTGTTTATAAAATTCAGTGC	7.92	4.52	107
2R_7391499_7391554_FBgn0041243_-	Gr43a	0	0	1	1.25	NA	1.125	0.012122	0	0	0.8	0.89	NA	0.845	0.002824	44.64	0	0	1.125	2R_7391499_7391554_FBgn0041243_-	CAAGTAAAG	TACCTTCCCGCACTTGACAGCTC	2.69	7.42	55
2R_10026876_10026950_FBgn0033473_+	CG12128	1.22	1	2.44	2	2	1.11	0.045759	0.67	0.68	0.79	0.77	1.16	0.105	0.011149	45.33	2	1.16	1.11	2R_10026876_10026950_FBgn0033473_+	CACGTGCGT	GATGCTCGCCGCCCCCACAGCCA	7.39	6.39	74
3L_15823990_15824167_FBgn0036534_-	DCP2	1.09	1.34	2.4	2.25	1.91	1.11	0.016813	0.66	0.74	0.98	0.99	1.41	0.285	0.019425	31.46	1.91	1.41	1.11	3L_15823990_15824167_FBgn0036534_-	AGGGTAGGG	TTTCCCCTCTCTATTTCAAGTCA	5.76	8.24	177
2R_8677271_8677326_FBgn0050354_+	UQCR-11L	1.98	2.14	3.01	3.3	1.53	1.095	0.022117	0.76	0.74	0.82	0.84	1.11	0.08	0.029857	32.14	1.53	1.11	1.095	2R_8677271_8677326_FBgn0050354_+	GAAGTGAGT	TTAGTCTTGTTAACTGAAAGCCT	7.97	0.75	55
2L_19023087_19023139_FBgn0032740_+	CG15172	2.03	1.82	3.02	2.99	1.56	1.08	0.009508	0.47	0.44	0.61	0.63	1.36	0.165	0.011728	32.08	1.56	1.36	1.08	2L_19023087_19023139_FBgn0032740_+	TTGGTTGGT	TTAAAGATTTCAAACCACAGAGT	2.01	2.57	52
2L_18841163_18841218_FBgn0051752_-	CG31752	0.03	0.01	1.05	1.14	54.75	1.075	0.001834	0.03	0.03	0.75	0.78	25.5	0.735	0.000416	28.57	54.75	25.5	1.075	2L_18841163_18841218_FBgn0051752_-	TCAGTGAGT	TTGCAATACATTTAATGCAGCAA	7.68	2.82	55
3L_18866262_18866319_FBgn0036818_+	CG14074	0	0.17	0.96	1.36	13.65	1.075	0.03852	0.17	0.1	0.68	0.73	5.22	0.57	0.005646	22.41	13.65	5.22	1.075	3L_18866262_18866319_FBgn0036818_+	AAAGTAAAT	ATTTGATGCTCTCACGTTAGTCA	4.06	3	57
2R_24531637_24532439_FBgn0035020_+	CG13585	1.58	1.23	2.5	2.45	1.76	1.07	0.026226	0.07	0.06	0.15	0.14	2.23	0.08	0.007722	44.96	2.23	1.76	1.07	2R_24531637_24532439_FBgn0035020_+	TTGGTAAGA	ACCTACTCCGATCTCCGCAGCGC	8.85	8.87	802
3R_31708158_31708220_FBgn0261583_-	CG42693	0.51	0.68	1.72	1.6	2.79	1.065	0.009409	0.4	0.47	0.89	0.84	1.99	0.43	0.009858	42.86	2.79	1.99	1.065	3R_31708158_31708220_FBgn0261583_-	ATTGTATGA	ATTGCCGTTCAAATATCCAGGGT	-0.09	4.33	62
3R_27664826_27664880_FBgn0039536_+	unc80	0	0	1	0.77	NA	0.885	0.016469	0	0	1	1.09	NA	1.045	0.001849	30.91	0	0	1.045	3R_27664826_27664880_FBgn0039536_+	ACGGTATGT	TTAATACCACTCCCTTTCAGCTC	9.94	8.15	54
2L_10908742_10908804_FBgn0032314_-	CG7309	0.06	0.05	1.02	1.14	19.64	1.025	0.003433	0.05	0.04	0.58	0.64	13.56	0.565	0.002885	22.22	19.64	13.56	1.025	2L_10908742_10908804_FBgn0032314_-	AGCGTGAGT	TATTATGATCCTTAAACAAGTAC	8.2	-0.31	62
2L_21577550_21577605_FBgn0260718_-	CR42545	0.11	0.07	1.18	1.04	12.33	1.02	0.005056	0.1	0.08	0.72	0.7	7.89	0.62	0.00052	30.36	12.33	7.89	1.02	2L_21577550_21577605_FBgn0260718_-	TAGGTACCG	AAACATAACGTATATTTCAGTTA	5.99	4.2	55
3L_15131211_15131267_FBgn0036482_-	CG13457	0.15	0.11	0.97	1.31	8.77	1.01	0.027542	0.55	0.53	0.69	0.77	1.35	0.19	0.044006	31.58	8.77	1.35	1.01	3L_15131211_15131267_FBgn0036482_-	AATGTAGGC	ATATATTTCACAGGTTCCAGTTA	3.19	-3.03	56
3L_15131218_15131267_FBgn0036482_-	CG13457	0.15	0.11	0.97	1.31	8.77	1.01	0.027542	0.15	0.1	0.62	0.74	5.44	0.555	0.013441	28	8.77	5.44	1.01	3L_15131218_15131267_FBgn0036482_-	AATGTAGGC	GTATTGTATATATTTCACAGGTT	3.19	7.57	49
2L_19911638_19911703_FBgn0262543_-	CR43097	0.11	0.12	1.09	1.14	9.7	1	0.000649	0.07	0.07	0.83	0.76	11.36	0.725	0.002322	48.48	11.36	9.7	1	2L_19911638_19911703_FBgn0262543_-	CAGGTGAGC	TGACATTTGACATGCCGCAGCAC	9.6	3.1	65
2R_13301294_13301365_FBgn0033827_+	CG17047	0	0	1	1	NA	1	0	0	0	0.67	1	NA	0.835	0.0369	48.61	0	0	1	2R_13301294_13301365_FBgn0033827_+	ATGGTGAGT	TGTGGCTTCCCTATTTGCAGCCT	10.13	8.54	71
X_17588931_17588987_FBgn0030846_+	CG12992	0.02	0.03	0.88	1.17	41	1	0.020408	0.02	0.02	0.42	0.43	21.25	0.405	0.000152	19.3	41	21.25	1	X_17588931_17588987_FBgn0030846_+	AAAGTAATA	ATTACTTGATTTACTTGCAGTTG	0.92	6.29	56
X_19235134_19235313_FBgn0031001_+	CG7884	0	0	1	1	NA	1	0	0	0.29	1	1	6.9	0.855	0.027577	50	6.9	6.9	1	X_19235134_19235313_FBgn0031001_+	AAAGTAAAT	CCATACATCGCACACCGCAGGTC	4.06	4.33	179
3R_22030741_22030815_FBgn0038926_-	CG13409	0.15	0.17	1	1.31	7.22	0.995	0.023512	0.18	0.25	0.94	1.06	4.65	0.785	0.007739	33.33	7.22	4.65	0.995	3R_22030741_22030815_FBgn0038926_-	ATAGTAAGT	TACTATCTTTCTGCTTTCAGTGC	8.65	9.63	74
3L_15716841_15716894_FBgn0260777_+	CG42571	0.08	0.1	0.87	0.77	9.11	0.73	0.004844	0.06	0.09	1.19	0.93	14.13	0.985	0.017197	29.63	14.13	9.11	0.985	3L_15716841_15716894_FBgn0260777_+	ATAGTGAGT	AATCCATACACGTACATTAGGTG	6.97	2.77	53
X_266842_266950_FBgn0029518_-	CG13376	0.25	0.45	1.27	1.2	3.53	0.885	0.014031	0.22	0.27	1.2	1.25	5	0.98	0.001299	32.11	5	3.53	0.98	X_266842_266950_FBgn0029518_-	GTTGTAAGC	ATAAAGTTTATGCTTTTCAGGCC	4.36	4.57	108
X_266842_266957_FBgn0029518_-	CG13376	0.29	0.45	1.27	1	3.07	0.765	0.039596	0.22	0.27	1.2	1.25	5	0.98	0.001299	32.76	5	3.07	0.98	X_266842_266957_FBgn0029518_-	ACGGTTCGT	ATAAAGTTTATGCTTTTCAGGCC	7.05	4.57	115
X_266842_266962_FBgn0029518_-	CG13376	0.11	0.36	1.18	1	4.64	0.855	0.030955	0.22	0.27	1.2	1.25	5	0.98	0.001299	33.88	5	4.64	0.98	X_266842_266962_FBgn0029518_-	AAAGTACGG	ATAAAGTTTATGCTTTTCAGGCC	4.86	4.57	120
2L_10451131_10451194_FBgn0065110_-	ppk10	0	0	0.75	1.2	NA	0.975	0.049346	0	0	0.75	0.83	NA	0.79	0.002554	26.56	0	0	0.975	2L_10451131_10451194_FBgn0065110_-	ATTGTGAGT	GAGTGCTAAACATTTCAAAGGCC	7.35	1.77	63
X_2709687_2710319_FBgn0024997_+	CG2681	0	0	0.5	0.33	NA	0.415	0.039483	0.25	0	1	1.2	8.8	0.975	0.025913	39.81	8.8	8.8	0.975	X_2709687_2710319_FBgn0024997_+	AAGGTAAAA	CAAATAACTTTATGTTTCAGGAA	8.38	8.99	632
2L_16680277_16680449_FBgn0267347_+	squ	0.09	0.05	0.24	0.33	4.07	0.215	0.048663	0.33	0.08	1.13	1.22	5.73	0.97	0.018247	42.77	5.73	4.07	0.97	2L_16680277_16680449_FBgn0267347_+	CTGGTGAGT	CACGCACCGGTGTGCAAAAGATT	10.1	-1.31	172
2L_16216653_16216721_FBgn0264392_-	CR43840	0.04	0	0.67	1	41.75	0.815	0.039163	0.04	0.05	1	1	22.22	0.955	2.7e-05	28.99	41.75	22.22	0.955	2L_16216653_16216721_FBgn0264392_-	GAGGCAAGT	TCATGGCCCATATACCGTAGCCG	3.32	3.84	68
2R_9788606_9788667_FBgn0265106_+	CR44208	0.2	0.2	1.14	1.16	5.75	0.95	0.000111	0.16	0.15	0.78	0.71	4.81	0.59	0.003572	53.23	5.75	4.81	0.95	2R_9788606_9788667_FBgn0265106_+	ATGGTGAGT	CTGTGCAATCTAATCCGCAGGAT	10.13	8.5	61
2L_10918212_10918744_FBgn0261871_-	dpr2	0.11	0	1	1	18.18	0.945	0.00337	0.58	0.72	1	1	1.54	0.35	0.03775	40.9	18.18	1.54	0.945	2L_10918212_10918744_FBgn0261871_-	CAGGTGAGC	TTGGTTTCCATATTTTCCAGATT	9.6	8.88	532
2L_5520236_5520286_FBgn0000318_+	cl	0.68	0.57	1.62	1.47	2.47	0.92	0.010066	0.5	0.49	0.78	0.75	1.55	0.27	0.003412	31.37	2.47	1.55	0.92	2L_5520236_5520286_FBgn0000318_+	ATAGTAAGC	ACCTGATAAATTAGGAGAAGTCC	5.26	-12.01	50
2L_5520236_5520301_FBgn0000318_+	cl	0.68	0.57	1.62	1.47	2.47	0.92	0.010066	0.57	0.54	0.72	0.75	1.32	0.18	0.013606	37.88	2.47	1.32	0.92	2L_5520236_5520301_FBgn0000318_+	ATAGTAAGC	AGAAGTCCATTCCCCTCCAGAAG	5.26	4.44	65
3L_7074984_7075041_FBgn0054030_-	CG34030	0.02	0	0.42	0.6	51	0.5	0.03127	0	0	0.83	1	NA	0.915	0.00852	31.03	51	51	0.915	3L_7074984_7075041_FBgn0054030_-	CTAGTGAGT	AAACGGTATTTAACCCCTAGCAA	7.43	4.06	57
3R_27670579_27670638_FBgn0039536_+	unc80	0	0	1	0.83	NA	0.915	0.00852	0	0	0.75	0.71	NA	0.73	0.00075	23.33	0	0	0.915	3R_27670579_27670638_FBgn0039536_+	ATTGTATGT	TTATCTTTTAATAACTCCAGTCA	4.34	4.9	59
2R_18616138_18616196_FBgn0034363_+	CG5327	0.03	0.02	0.91	0.96	37.4	0.91	0.000784	0.04	0.03	0.82	0.83	23.57	0.79	8e-05	45.76	37.4	23.57	0.91	2R_18616138_18616196_FBgn0034363_+	CAGGTGAGT	GTAAGAACGTTGTTTCCAAGTCC	10.67	-0.66	58
3R_20107779_20107838_FBgn0051206_-	CG31206	0.09	0.08	1	0.98	11.65	0.905	0.000153	0.06	0.06	0.81	0.81	13.5	0.75	0	28.33	13.5	11.65	0.905	3R_20107779_20107838_FBgn0051206_-	GATGTAAGA	GAATATATTATGACATGCAGGAA	5.46	2.85	59
3R_30038529_30038586_FBgn0001281_-	janB	0.02	0.01	0.92	0.92	61.33	0.905	3.1e-05	0.02	0.01	0.8	0.8	53.33	0.785	4.1e-05	29.31	61.33	53.33	0.905	3R_30038529_30038586_FBgn0001281_-	TTCGTAAGG	CCTAATATACTTGGTTTTAGAAA	5.31	5.13	57
X_15914095_15914155_FBgn0030706_+	CG8909	0	0.18	0.75	1	9.72	0.785	0.036411	0	0.2	1	1	10	0.9	0.012122	39.34	10	9.72	0.9	X_15914095_15914155_FBgn0030706_+	TTGGTATGA	GTTTTCTGTTGTCAAATCAGAAA	5.24	5.88	60
2R_22917470_22917533_FBgn0050187_-	CG30187	0.1	0	1	0.88	18.8	0.89	0.007613	0.22	0	0.75	0.86	7.32	0.695	0.029915	34.38	18.8	7.32	0.89	2R_22917470_22917533_FBgn0050187_-	CTTGTAGGT	GTATTTGAGTTAACCAACAGGCA	2.94	1.78	63
3L_19955192_19955246_FBgn0259148_-	CG42263	0.09	0.06	0.9	0.8	11.33	0.775	0.004506	0.06	0.05	0.97	0.92	17.18	0.89	0.00082	29.09	17.18	11.33	0.89	3L_19955192_19955246_FBgn0259148_-	TGGGTAAAC	GTTATGCTCCAGCTTTTCAGGAA	3.32	2.24	54
2L_10433779_10433852_FBgn0032249_-	TBC1D16	0.15	0	0.91	1	12.73	0.88	0.009735	0.17	0	0.62	0.68	7.65	0.565	0.02452	39.19	12.73	7.65	0.88	2L_10433779_10433852_FBgn0032249_-	CAGGTGGGT	TTTTGGTTTATAACCCACAGGGT	8.56	7.79	73
3R_22031207_22031272_FBgn0038926_-	CG13409	0.29	0.4	1.2	1.25	3.55	0.88	0.00468	0.29	0.18	0.69	0.9	3.38	0.56	0.042	31.82	3.55	3.38	0.88	3R_22031207_22031272_FBgn0038926_-	ATGGTGGGT	TATGTATGACAATCATTCAGACG	6.18	1.86	65
2R_14606862_14606928_FBgn0053468_-	CG33468	0	0.25	1	1	8	0.875	0.019804	0	0.25	1	0.86	7.44	0.805	0.030244	25.37	8	7.44	0.875	2R_14606862_14606928_FBgn0053468_-	ATAGTAAGT	ATGTATATAATAATCTACAGGTG	8.65	6.9	66
3R_14636845_14636899_FBgn0038247_+	Cad88C	0.33	0	1	1	6.06	0.835	0.0369	0.25	0	1	1	8	0.875	0.019804	30.91	8	6.06	0.875	3R_14636845_14636899_FBgn0038247_+	TTTGTAAGT	ACATACCTTTCCCCTTTAAGACT	7.4	7.14	54
3R_31739710_31739776_FBgn0000557_+	eEF1alpha2	0	0	0.75	1	NA	0.875	0.019804	0.03	0	0.1	0.12	7.33	0.095	0.034176	35.82	7.33	7.33	0.875	3R_31739710_31739776_FBgn0000557_+	AGAGTACGG	CGATTTCCTTCTAATTCTAGGAT	2.65	9.54	66
3R_26071268_26071404_FBgn0266255_-	CR44950	0.13	0.16	0.86	1.17	7	0.87	0.030577	0.08	0.17	0.74	0.94	6.72	0.715	0.022723	32.12	7	6.72	0.87	3R_26071268_26071404_FBgn0266255_-	ATGGTACGC	CCTTTTCTAAAACCCAACAGCAA	8.57	4.63	136
2L_5678730_5678782_FBgn0031729_+	CG12511	0.07	0.1	1.01	0.89	11.18	0.865	0.005073	0.06	0.09	0.82	0.68	10	0.675	0.011062	52.83	11.18	10	0.865	2L_5678730_5678782_FBgn0031729_+	TACGTATGT	GCTCTAATACCCAATCCTAGCCA	5.54	1.88	52
3R_11971832_11971893_FBgn0037970_+	GC2	0.14	0.17	1.03	1	6.55	0.86	0.000608	0.12	0.14	0.87	0.86	6.65	0.735	0.000231	33.87	6.65	6.55	0.86	3R_11971832_11971893_FBgn0037970_+	TAAGTTAAT	TAATTGCGAACCCATCACAGCGT	-6.94	1.77	61
2R_9395865_9395928_FBgn0033408_-	CG8800	0.03	0.04	0.5	0.75	17.86	0.59	0.042137	0.02	0.04	0.75	1	29.17	0.845	0.021321	40.62	29.17	17.86	0.845	2R_9395865_9395928_FBgn0033408_-	CGAGTGAGC	CTTTTCTGTTTCCCCTGCAGGAG	5.16	13.59	63
3L_12741801_12741860_FBgn0052112_+	CG32112	0.13	0.16	0.91	0.93	6.34	0.775	0.000541	0.13	0.15	0.99	0.98	7.04	0.845	0.000175	35	7.04	6.34	0.845	3L_12741801_12741860_FBgn0052112_+	ACCGTACGT	CCATTTGCCATTTTCCGAAGATG	8.98	6.38	59
2L_21798952_21799020_FBgn0265255_-	CR44269	0.04	0	0.88	0.84	43	0.84	0.001132	0.03	0.01	0.7	0.61	32.75	0.635	0.005229	47.83	43	32.75	0.84	2L_21798952_21799020_FBgn0265255_-	GAAGTAAGT	ACCAATTCTCATCTTTTTAGAAG	9.82	7.78	68
X_15713816_15713900_FBgn0030674_+	CG8184	0.14	0	1	0.82	13	0.84	0.01793	0.1	0.04	0.25	0.22	3.36	0.165	0.038926	34.12	13	3.36	0.84	X_15713816_15713900_FBgn0030674_+	TACGTTAGT	CTTTTGTCAATCCATTGCAGTTT	-1.77	7.34	84
2L_2652063_2652122_FBgn0053125_-	CG33125	0.07	0.06	0.85	0.79	12.62	0.755	0.001619	0.06	0.06	0.96	0.83	14.92	0.835	0.006005	41.67	14.92	12.62	0.835	2L_2652063_2652122_FBgn0053125_-	AGCGTGAGT	GAATATATACGCAAATCTAGGAC	8.2	3.3	59
2R_12441121_12441187_FBgn0050334_-	CG30334	0.07	0.05	0.85	0.94	14.92	0.835	0.003034	0.45	0.44	0.85	0.9	1.97	0.43	0.003497	46.27	14.92	1.97	0.835	2R_12441121_12441187_FBgn0050334_-	AATGTGAGT	TAGCCAGCTAACATGTCCAGCTG	7.8	-1.92	66
2R_12441138_12441187_FBgn0050334_-	CG30334	0.07	0.05	0.85	0.94	14.92	0.835	0.003034	0.07	0.05	0.71	0.77	12.33	0.68	0.002156	44	14.92	12.33	0.835	2R_12441138_12441187_FBgn0050334_-	AATGTGAGT	TGATGGACCTCCGATATTAGCCA	7.8	0.42	49
2R_13124929_13124986_FBgn0033792_+	CG13325	0	0	0.67	1	NA	0.835	0.0369	0	0	0.67	0.5	NA	0.585	0.020466	41.38	0	0	0.835	2R_13124929_13124986_FBgn0033792_+	CACGTAGGT	ATAACCCCTTTCCTATCCAGGGC	6.85	9.61	57
2R_14375945_14375998_FBgn0050075_+	CG30075	0.35	0.29	1.16	1.15	3.61	0.835	0.001324	0.4	0.39	0.81	0.84	2.09	0.43	0.001349	25.93	3.61	2.09	0.835	2R_14375945_14375998_FBgn0050075_+	TAAGTAAGT	ATTGACCATTTAAAGGATAGGAA	8.07	-1.39	53
3L_2246588_2246653_FBgn0052301_+	CG32301	0	0	0.57	0.8	NA	0.685	0.027047	0	0	0.78	0.89	NA	0.835	0.004311	33.33	0	0	0.835	3L_2246588_2246653_FBgn0052301_+	TAAGTGAGT	TGCTTTTTATTTGTTTTCAGGAG	6.43	10.2	65
3R_21867745_21867808_FBgn0038909_-	CG6569	1.13	1.2	1.98	2.02	1.72	0.835	0.002323	0.73	0.74	0.88	0.91	1.22	0.16	0.009625	40.62	1.72	1.22	0.835	3R_21867745_21867808_FBgn0038909_-	CAGGTAGGA	GCAGCCAATTCACCATTTAGCAA	9.79	1.37	63
3R_6641373_6641427_FBgn0051286_+	CG31286	0.01	0.01	0.84	0.84	84	0.83	0	0.03	0.02	0.76	0.75	30.2	0.73	9.4e-05	41.82	84	30.2	0.83	3R_6641373_6641427_FBgn0051286_+	GAGGTACTT	CGATCCAACATCCATTTCAGTTC	7.82	5.89	54
2R_12486311_12486585_FBgn0033744_+	Dh44-R2	1	1	1.17	1.14	1.15	0.155	0.009236	0	0	0.82	0.83	NA	0.825	3.7e-05	34.55	1.15	1.15	0.825	2R_12486311_12486585_FBgn0033744_+	ACGGTGCGT	CTGTTTATCGTTTATTGTAGACT	10.25	9.11	274
2R_22715040_22715101_FBgn0050268_+	CG30268	0.12	0.1	0.67	0.93	7.27	0.69	0.033901	0.12	0.07	0.84	1	9.68	0.825	0.010164	33.87	9.68	7.27	0.825	2R_22715040_22715101_FBgn0050268_+	AGCGTGGGT	AAGGTACCTTTGACTTGTAGGGC	1.59	4.92	61
3L_7465615_7465669_FBgn0035786_+	Tsp66A	0.05	0.03	0.9	0.83	21.62	0.825	0.001941	0.05	0.03	0.56	0.75	16.38	0.615	0.023286	36.36	21.62	16.38	0.825	3L_7465615_7465669_FBgn0035786_+	GCAGTGAGT	TGTTGACGCATTTTTTTAAGGGA	7.39	6.26	54
3L_7465615_7465669_FBgn0261536_+	CG42660	0.05	0.03	0.9	0.83	21.62	0.825	0.001941	0.05	0.03	0.56	0.75	16.38	0.615	0.023286	36.36	21.62	16.38	0.825	3L_7465615_7465669_FBgn0261536_+	GCAGTGAGT	TGTTGACGCATTTTTTTAAGGGA	7.39	6.26	54
3L_7465615_7465669_FBgn0261537_+	CG42661	0.05	0.03	0.9	0.83	21.62	0.825	0.001941	0.05	0.03	0.56	0.75	16.38	0.615	0.023286	36.36	21.62	16.38	0.825	3L_7465615_7465669_FBgn0261537_+	GCAGTGAGT	TGTTGACGCATTTTTTTAAGGGA	7.39	6.26	54
3R_30034740_30034805_FBgn0264837_-	CR44045	0.11	0.18	0.96	0.98	6.69	0.825	0.001941	0.68	0.69	0.98	1.09	1.51	0.35	0.024005	34.85	6.69	1.51	0.825	3R_30034740_30034805_FBgn0264837_-	AAGGTAACA	AATGTGATTTTGTGCAGTAGTTC	8.92	1.19	65
3R_5788945_5789328_FBgn0037376_-	Hat1	0.08	0.1	0.9	0.93	10.17	0.825	0.000477	0.15	0.14	0.73	0.76	5.14	0.6	0.000694	35.68	10.17	5.14	0.825	3R_5788945_5789328_FBgn0037376_-	TCGGTAAAT	GTGATTTTTGATTTTTAAAGCAA	6.8	5.55	383
2L_11115320_11115375_FBgn0041246_+	Gr32a	0.15	0.09	1	0.87	7.79	0.815	0.007628	0.14	0.06	0.94	0.78	8.6	0.76	0.013569	33.93	8.6	7.79	0.815	2L_11115320_11115375_FBgn0041246_+	GAGGTGAGC	ATGAGTGTTTTTATTTCAAGGCC	8.7	6.03	55
2L_17986465_17986517_FBgn0032658_+	CG5681	0.09	0.02	0.81	0.93	15.82	0.815	0.007186	0.12	0.04	0.63	0.68	8.19	0.575	0.006662	22.64	15.82	8.19	0.815	2L_17986465_17986517_FBgn0032658_+	AAGGTATAT	TTTTAAAGTGTATTTTACAGCCA	7.84	5.08	52
2R_15423625_15423683_FBgn0050472_-	CG30472	0.14	0.08	0.99	0.86	8.41	0.815	0.007628	0.09	0.05	0.84	0.75	11.36	0.725	0.004582	37.29	11.36	8.41	0.815	2R_15423625_15423683_FBgn0050472_-	TGGGTGAGA	ACCCATACTTTTTCGTCAAGGGC	6.04	3.27	58
4_261725_261776_FBgn0259216_+	RhoGAP102A	0.26	0.34	1.05	1	3.42	0.725	0.004206	0.26	0.21	1.1	1	4.47	0.815	0.004672	38.46	4.47	3.42	0.815	4_261725_261776_FBgn0259216_+	AACGCATGT	ATTAACCAAACGAATTTCAGGTA	-0.06	5.09	51
X_7453020_7453076_FBgn0262827_-	CG43198	0	0.06	0.71	0.73	24	0.69	0.002094	0	0.07	0.8	0.9	24.29	0.815	0.005561	33.33	24.29	24	0.815	X_7453020_7453076_FBgn0262827_-	GTGGTGAGG	AATCTTTTCGAATTGCTCAGAAA	6.13	4.39	56
3L_19955548_19955607_FBgn0259148_-	CG42263	0.07	0.06	0.85	0.82	12.85	0.77	0.000421	0.07	0.06	0.89	0.86	13.46	0.81	0.000381	36.67	13.46	12.85	0.81	3L_19955548_19955607_FBgn0259148_-	ACAGTGAGT	CATCTAAACCCAAATACCAGCAC	8.34	-0.17	59
3R_21889604_21889664_FBgn0264426_+	CG43844	0.32	0.3	1.17	1.07	3.61	0.81	0.003939	0.24	0.24	0.71	0.66	2.85	0.445	0.003141	44.26	3.61	2.85	0.81	3R_21889604_21889664_FBgn0264426_+	GGCGTAAGT	AGAAACTTCCTCATTCCCAGTCC	9.39	4.42	60
2R_15556657_15556714_FBgn0034031_+	CG12963	0.54	0.59	1.31	1.43	2.42	0.805	0.006457	0.35	0.36	0.85	0.95	2.54	0.545	0.008394	37.93	2.54	2.42	0.805	2R_15556657_15556714_FBgn0034031_+	CGGGTAGGT	CAAATCACCCCAATCCCAAGGAG	8.53	1.35	57
2L_20874784_20874840_FBgn0266316_+	CR44981	0.1	0.18	0.88	1	6.71	0.8	0.008027	0.11	0.19	0.89	0.82	5.7	0.705	0.005636	35.09	6.71	5.7	0.8	2L_20874784_20874840_FBgn0266316_+	ACTGTAAGC	TGCGACTCTCCAATTCTCAGATG	4.95	7.14	56
3L_4027213_4027274_FBgn0045479_+	Gr64a	0.33	0.12	0.93	1	4.29	0.74	0.021647	0	0.1	0.8	0.9	17	0.8	0.007722	41.94	17	4.29	0.8	3L_4027213_4027274_FBgn0045479_+	TTGGTAAGA	GGGTATTTGTATCCATCCAGTGG	8.85	4.68	61
3R_22030897_22030949_FBgn0038926_-	CG13409	0.29	0.17	1.06	1	4.48	0.8	0.006958	0.18	0.17	0.81	0.8	4.6	0.63	0.000126	47.17	4.6	4.48	0.8	3R_22030897_22030949_FBgn0038926_-	TACGTGAGT	TCACTAACTTTCCACTTCAGTTC	7.77	7.76	52
2L_2579956_2580014_FBgn0031436_-	ND-B17.2	0.33	0.34	1.06	1.2	3.37	0.795	0.007702	0.19	0.21	0.34	0.37	1.77	0.155	0.013259	35.59	3.37	1.77	0.795	2L_2579956_2580014_FBgn0031436_-	CAAGTGAGT	TTTCTGGGTTTTCCCGGCAGCAT	9.1	8.62	58
3R_22030584_22030640_FBgn0038926_-	CG13409	0	0	0.76	0.82	NA	0.79	0.001439	0	0	0.79	0.8	NA	0.795	4e-05	45.61	0	0	0.795	3R_22030584_22030640_FBgn0038926_-	ACAGTAGGT	TAATGATCTTCTACGCACAGATC	5.67	5.06	56
2R_20265159_20265222_FBgn0034493_+	CG8908	0.24	0.27	0.38	0.38	1.49	0.125	0.014096	0.21	0.2	0.95	1.04	4.85	0.79	0.003269	50	4.85	1.49	0.79	2R_20265159_20265222_FBgn0034493_+	GCCGTATGT	ACACCACATGAACCAACCAGGTA	6.35	1.41	63
3L_581505_581556_FBgn0035143_+	Ppm1	0.09	0.08	0.88	0.87	10.29	0.79	8e-05	0.1	0.09	0.75	0.74	7.84	0.65	0.000118	42.31	10.29	7.84	0.79	3L_581505_581556_FBgn0035143_+	CAGGTGAAT	TGGCTTACTCCTTCCTCAAGTTC	6.6	4.13	51
3L_888246_888296_FBgn0052479_+	Usp10	0.07	0.07	0.9	0.82	12.29	0.79	0.002554	0.07	0.07	0.49	0.43	6.57	0.39	0.005865	33.33	12.29	6.57	0.79	3L_888246_888296_FBgn0052479_+	AAGGTCAGA	AACTTTCTTGCTCTTTGCAGCTG	6.8	10	50
2R_10247973_10248049_FBgn0033499_+	CG12914	0.07	0.11	0.83	0.92	9.72	0.785	0.003912	0.1	0.14	0.88	0.87	7.29	0.755	0.000745	48.05	9.72	7.29	0.785	2R_10247973_10248049_FBgn0033499_+	AAGGTAACG	GGCATTTATTTTTCTGATAGTTT	10.19	5.05	76
X_10566499_10566558_FBgn0030215_-	CG15296	0.2	0.21	0.95	1.03	4.83	0.785	0.002627	0.17	0.17	0.61	0.61	3.59	0.44	0	26.67	4.83	3.59	0.785	X_10566499_10566558_FBgn0030215_-	TGAGTACGA	ACAAACGTAATTTTGAATAGTTC	0.56	3.46	59
2L_12920101_12920154_FBgn0040509_+	ACXB	0.07	0.05	0.7	0.58	10.67	0.58	0.010821	0.08	0.07	1	0.7	11.33	0.775	0.035517	33.33	11.33	10.67	0.775	2L_12920101_12920154_FBgn0040509_+	CTGGTAAGC	ATCATCACTTTCGAACCCAGTTA	8.69	4.26	53
2L_20815075_20815137_FBgn0053322_-	CG33322	0.09	0.05	0.7	0.76	10.43	0.66	0.002971	0.1	0.05	0.83	0.87	11.33	0.775	0.001702	39.68	11.33	10.43	0.775	2L_20815075_20815137_FBgn0053322_-	ACTGTGAGT	CCTTTATGTATCGTGGACAGACA	7.94	5.77	62
3L_14567484_14567546_FBgn0261816_+	CG42758	0.57	0.57	1.34	1.35	2.36	0.775	4.2e-05	0.3	0.3	0.57	0.56	1.88	0.265	0.000356	31.75	2.36	1.88	0.775	3L_14567484_14567546_FBgn0261816_+	CATGTAAGT	ATAAGTTGATAACCACTTAGGCC	8.31	0.11	62
3R_11897902_11897960_FBgn0085336_+	CG34307	0.08	0.07	0.65	0.95	10.67	0.725	0.040282	0.06	0.05	0.83	0.83	15.09	0.775	4.2e-05	30.51	15.09	10.67	0.775	3R_11897902_11897960_FBgn0085336_+	CATGTGAGT	CAAAAAATGTATATATGCAGATA	7.83	4.09	58
X_16083484_16083541_FBgn0030725_+	CG8958	0.02	0.04	0.71	0.74	24.17	0.695	0.000672	0.06	0.1	0.87	0.84	10.69	0.775	0.001039	27.59	24.17	10.69	0.775	X_16083484_16083541_FBgn0030725_+	GCGGTACGA	AAAAATATGCAAAATCCCAGGAC	8	0.9	57
2R_10109886_10109932_FBgn0003071_+	Pfk	0.08	0.08	0.85	0.85	10.62	0.77	0	0.07	0.08	0.77	0.79	10.4	0.705	0.000251	31.91	10.62	10.4	0.77	2R_10109886_10109932_FBgn0003071_+	TATGTAAGT	TCACTACACCCACTTATAAGCTG	6.69	1.31	46
2R_10109886_10109950_FBgn0003071_+	Pfk	0.08	0.08	0.85	0.85	10.62	0.77	0	0.19	0.21	0.71	0.73	3.6	0.52	0.000739	35.38	10.62	3.6	0.77	2R_10109886_10109950_FBgn0003071_+	TATGTAAGT	AGCTGTTCGATTGTTTGGAGATT	6.69	-3.4	64
X_10566499_10566562_FBgn0030215_-	CG15296	0.26	0.31	1.01	1.1	3.7	0.77	0.00444	0.17	0.17	0.61	0.61	3.59	0.44	0	28.12	3.7	3.59	0.77	X_10566499_10566562_FBgn0030215_-	GTTGTGAGT	ACAAACGTAATTTTGAATAGTTC	6.59	3.46	63
3L_20266011_20266076_FBgn0264468_-	CR43876	0.32	0.31	1.14	1.02	3.43	0.765	0.006137	0.29	0.28	0.97	0.93	3.33	0.665	0.00096	43.94	3.43	3.33	0.765	3L_20266011_20266076_FBgn0264468_-	AAGGTATTC	TTCTCTTTTGGATCACGCAGGTG	6.8	7.77	65
3R_22367279_22367353_FBgn0038951_-	CG5380	0.5	0.8	1.43	1.4	2.18	0.765	0.036707	0.35	0.31	0.6	0.61	1.83	0.275	0.005573	18.67	2.18	1.83	0.765	3R_22367279_22367353_FBgn0038951_-	TCAGTTGCG	TGATTTTTGTTATTTTTTAGCTT	-25.3	9.62	74
X_15836209_15836281_FBgn0052582_+	CR32582	0.15	0.13	0.79	0.77	5.57	0.64	0.000488	0.26	0.21	1.06	0.94	4.26	0.765	0.007142	42.47	5.57	4.26	0.765	X_15836209_15836281_FBgn0052582_+	GAGGTAAGC	TCTTGACTTGACTGATCAAGGGC	9.85	1.53	72
3L_15717235_15717291_FBgn0260777_+	CG42571	0.02	0.05	0.76	0.83	22.71	0.76	0.002501	0.05	0.08	0.68	0.81	11.46	0.68	0.009487	14.04	22.71	11.46	0.76	3L_15717235_15717291_FBgn0260777_+	TCGGTAAAT	TTATTACCAATTATATTAAGATG	6.8	2.18	56
3R_11222843_11222899_FBgn0051144_-	CR31144	0.24	0.23	0.97	1.02	4.23	0.76	0.001123	0.18	0.17	0.8	0.83	4.66	0.64	0.00061	36.84	4.66	4.23	0.76	3R_11222843_11222899_FBgn0051144_-	ATGGTAAAA	ACCATCGTTTCATCATCCAGACT	4.79	6.69	56
2L_21089432_21089490_FBgn0032913_+	CG9259	0.14	0.1	0.75	0.7	6.04	0.605	0.002789	0.23	0.14	1.03	0.85	5.08	0.755	0.017303	33.9	6.04	5.08	0.755	2L_21089432_21089490_FBgn0032913_+	GAGGTTAGA	TATCTTGGGACGGTTTACAGCAG	4.15	2.51	58
2R_13960110_13960318_FBgn0033886_-	Rpn13	0.16	0.19	0.81	1.05	5.31	0.755	0.02471	0.1	0.12	0.22	0.2	1.91	0.1	0.019419	38.76	5.31	1.91	0.755	2R_13960110_13960318_FBgn0033886_-	GAGGTAAGA	CTTCATCCAATCTTCGCCAGCTC	10.06	4.64	208
2R_15227113_15227167_FBgn0265508_+	CR44370	0.06	0.07	0.72	0.92	12.62	0.755	0.017136	0.05	0.07	0.73	0.88	13.42	0.745	0.010158	27.27	13.42	12.62	0.755	2R_15227113_15227167_FBgn0265508_+	AAGGTCAGA	GTATATGGCGCTATCAAAAGGAG	6.8	2.21	54
2L_12919731_12919788_FBgn0040509_+	ACXB	0.02	0	0.5	0.77	63.5	0.625	0.043849	0.01	0	0.8	0.71	151	0.75	0.003625	31.03	151	63.5	0.75	2L_12919731_12919788_FBgn0040509_+	TAAGTATGT	AATTTTCGCCTTGTTAACAGGAT	4.58	6.65	57
2R_22091057_22091112_FBgn0265046_-	CG44163	0.11	0.11	0.74	0.67	6.41	0.595	0.003442	0.45	0.39	1.16	1.18	2.79	0.75	0.001773	30.36	6.41	2.79	0.75	2R_22091057_22091112_FBgn0265046_-	CTGGCAAGT	TTTGTATTTTGTTTCAGCAGAAC	2.89	6.66	55
3L_17760347_17760400_FBgn0052181_+	CG32181	0.07	0.05	0.8	0.82	13.5	0.75	0.000355	0.06	0.05	0.66	0.68	12.18	0.615	0.00033	29.63	13.5	12.18	0.75	3L_17760347_17760400_FBgn0052181_+	TATGTGCGT	CGCGAATATTTAAATTTTAGCAA	1.54	3.74	53
3R_30705990_30706054_FBgn0051010_-	CG31010	0.45	0.38	1.16	1.17	2.81	0.75	0.002215	0.42	0.35	0.83	0.84	2.17	0.45	0.006116	41.54	2.81	2.17	0.75	3R_30705990_30706054_FBgn0051010_-	TTTGTAAGT	CGACCTATATTCCTACATAGAGG	7.4	4.97	64
2R_15201320_15201466_FBgn0033996_+	CG11807	1.2	1.11	1.91	1.89	1.65	0.745	0.003807	0.45	0.5	0.8	0.89	1.78	0.37	0.018813	24.49	1.78	1.65	0.745	2R_15201320_15201466_FBgn0033996_+	TAGGTAATG	AAATCACCTCTTGGCTATAGCCA	7.57	2.23	146
2R_15216879_15216941_FBgn0034000_+	CG11808	0.04	0.02	0.56	0.74	21.67	0.62	0.020673	0	0.03	0.68	0.84	50.67	0.745	0.011727	41.27	50.67	21.67	0.745	2R_15216879_15216941_FBgn0034000_+	AACGTGAGT	CTGATTTTCAATTCCGACAGTTC	9.54	7.62	62
2R_22715392_22715451_FBgn0050268_+	CG30268	0.01	0	0.74	0.76	150	0.745	0.000225	0.01	0.01	0.71	0.5	60.5	0.595	0.029759	36.67	150	60.5	0.745	2R_22715392_22715451_FBgn0050268_+	GGAGTAAGA	ACTCATCAAATGCCTAATAGTTT	4.36	3.14	59
3L_11473346_11473394_FBgn0028667_+	Vha16-3	0.13	0.09	0.8	0.91	7.77	0.745	0.006114	0.11	0.08	0.61	0.65	6.63	0.535	0.002176	38.78	7.77	6.63	0.745	3L_11473346_11473394_FBgn0028667_+	GCAGTAAGT	TTATCCCATTGGTTTCTCAGAAT	9.07	7.26	48
3L_1399417_1399468_FBgn0052320_+	CG32320	0.17	0.07	0.63	0.55	4.92	0.47	0.018059	0.21	0.09	0.9	0.89	5.97	0.745	0.006468	36.54	5.97	4.92	0.745	3L_1399417_1399468_FBgn0052320_+	TACGTTTGT	AGGTAACTTGTCATCCGCAGATG	-5.03	7.72	51
3L_21196713_21196775_FBgn0041100_-	park	0.35	0.34	1.01	1.17	3.16	0.745	0.011379	0.38	0.42	0.9	0.99	2.36	0.545	0.008066	38.1	3.16	2.36	0.745	3L_21196713_21196775_FBgn0041100_-	CGCGTAAGT	CTAAAATTAAACCCGATCAGCTG	9.93	-0.36	62
3L_3654640_3654698_FBgn0035455_-	CG10862	0.06	0.04	0.8	0.79	15.9	0.745	0.000225	0.06	0.04	0.6	0.58	11.8	0.54	0.000685	35.59	15.9	11.8	0.745	3L_3654640_3654698_FBgn0035455_-	TTGGTTGGT	TTCGCTGTGCTCAACTACAGATA	2.01	7.34	58
2R_7428456_7428511_FBgn0033168_-	CG11145	0.2	0.19	0.94	0.93	4.79	0.74	9.1e-05	0.16	0.15	0.6	0.6	3.87	0.445	0.000126	44.64	4.79	3.87	0.74	2R_7428456_7428511_FBgn0033168_-	CTGGTGAGC	ACTATTCCCAATTCTTCCAGTGG	8.05	6.16	55
3L_22717364_22717490_FBgn0037182_-	ArfGAP3	0.28	0.36	1	1.12	3.31	0.74	0.009363	0.27	0.35	0.68	0.61	2.08	0.335	0.02426	26.77	3.31	2.08	0.74	3L_22717364_22717490_FBgn0037182_-	ATTGTAAGC	ATTCCCCTAATGAAATGTAGCTA	5.06	2.53	126
2L_5547757_5547807_FBgn0031717_+	Oscillin	0.21	0.17	0.88	0.97	4.87	0.735	0.004459	0.05	0.05	0.19	0.15	3.4	0.12	0.026671	25.49	4.87	3.4	0.735	2L_5547757_5547807_FBgn0031717_+	AAAGTAAGA	ATATTTAATAACGCTTTCAGCTT	6.91	4.15	50
2L_5678726_5678782_FBgn0031729_+	CG12511	0.29	0.33	1.11	0.98	3.37	0.735	0.008453	0.06	0.09	0.82	0.68	10	0.675	0.011062	52.63	10	3.37	0.735	2L_5678726_5678782_FBgn0031729_+	GCAGTACGT	GCTCTAATACCCAATCCTAGCCA	6.49	1.88	56
2R_12690817_12690872_FBgn0050052_-	Obp49a	0.67	0.57	1.29	1.09	1.92	0.57	0.036386	0.62	0.5	1.29	1.3	2.31	0.735	0.006643	41.07	2.31	1.92	0.735	2R_12690817_12690872_FBgn0050052_-	CTGGTATGA	TATAACTAATCTATTAACAGAAT	6.69	6.42	55
3L_19296297_19296350_FBgn0028380_+	fal	0.15	0.15	0.83	0.94	5.9	0.735	0.005553	0.13	0.12	0.71	0.73	5.76	0.595	0.000353	33.33	5.9	5.76	0.735	3L_19296297_19296350_FBgn0028380_+	ACTGTGAGA	TTTAAGATTGAATATTGCAGATC	2.78	4.49	53
X_575090_575167_FBgn0000108_+	Appl	0	0	0.57	0.75	NA	0.66	0.018092	0	0	0.8	0.67	NA	0.735	0.00773	55.13	0	0	0.735	X_575090_575167_FBgn0000108_+	TCGGTATTT	TCTCTCCCCTTTCGTTGCAGAGC	4.52	11.59	77
2R_12485854_12485913_FBgn0033744_+	Dh44-R2	0.29	0.17	1	0.92	4.17	0.73	0.009617	0.25	0.5	1	1.1	2.8	0.675	0.037554	31.67	4.17	2.8	0.73	2R_12485854_12485913_FBgn0033744_+	CAGGTATAT	TTCGAAAATCCATTCTTTAGGGC	7.88	4.8	59
2R_18665598_18665649_FBgn0053136_-	CG33136	0.01	0.02	0.72	0.77	49.67	0.73	0.001218	0.39	0.41	0.66	0.71	1.71	0.285	0.008808	36.54	49.67	1.71	0.73	2R_18665598_18665649_FBgn0053136_-	GAAGTAAGT	ATTACAGCGGCGTTCTGCAGCAC	9.82	1.47	51
2L_15252391_15252451_FBgn0028862_+	dao	0	0	0.5	0.57	NA	0.535	0.004253	0	0	0.75	0.7	NA	0.725	0.001187	31.15	0	0	0.725	2L_15252391_15252451_FBgn0028862_+	TTCGTAAGT	AAATAATTATCCTCCCGCAGCAT	9.77	6.13	60
3L_1399056_1399105_FBgn0052320_+	CG32320	0.38	0.21	0.84	0.89	2.93	0.57	0.023319	0.38	0.17	0.89	1.11	3.64	0.725	0.04129	30	3.64	2.93	0.725	3L_1399056_1399105_FBgn0052320_+	AAGGTGTGT	TTTTATTACTCCTTTAACAGGTG	6.64	9.78	49
3R_10349740_10349795_FBgn0051406_+	CG31406	0.11	0.13	0.69	0.7	5.79	0.575	0.000378	0.13	0.16	0.84	0.9	6	0.725	0.002133	17.86	6	5.79	0.725	3R_10349740_10349795_FBgn0051406_+	AATGTAAAA	TTATAAAATTCCAATTTTAGGCA	-0.78	8.17	55
2R_14375001_14375059_FBgn0033931_-	Obp50e	0	0	0.72	0.72	NA	0.72	0	0	0	0.62	0.6	NA	0.61	0.000269	27.12	0	0	0.72	2R_14375001_14375059_FBgn0033931_-	CTGGTAAGT	AACTTTCGTATCTAAAACAGTGC	10.65	4.43	58
3L_14218291_14218344_FBgn0036415_+	CG7768	0.05	0.05	0.76	0.78	15.4	0.72	0.000193	0.26	0.27	0.85	0.84	3.19	0.58	0.000149	27.78	15.4	3.19	0.72	3L_14218291_14218344_FBgn0036415_+	CCGGTAAAT	TTCGATTTTAAACCTAATAGATC	6.89	3.14	53
3L_14218291_14218382_FBgn0036415_+	CG7768	0.05	0.05	0.76	0.78	15.4	0.72	0.000193	0.21	0.21	0.8	0.83	3.88	0.605	0.000614	34.78	15.4	3.88	0.72	3L_14218291_14218382_FBgn0036415_+	CCGGTAAAT	AATTTTCGGCATCTGCGAAGATG	6.89	0.9	91
3L_18298845_18298894_FBgn0036785_-	CG13700	0.05	0.03	0.47	0.48	11.88	0.435	0.00066	0.06	0.03	0.75	0.78	17	0.72	0.000867	30	17	11.88	0.72	3L_18298845_18298894_FBgn0036785_-	CAGGTTTGT	ACAATATTCGCGATCAACAGTGC	7.44	3.61	49
3R_10754148_10754205_FBgn0037829_-	CG14691	0.1	0.04	0.81	0.77	11.29	0.72	0.002498	0.08	0.06	0.78	0.68	10.43	0.66	0.005916	39.66	11.29	10.43	0.72	3R_10754148_10754205_FBgn0037829_-	TGGGTAGGA	TAATAAATTCTATCGTTCAGCAT	5.12	4.58	57
2L_16665111_16665161_FBgn0032593_-	Trpgamma	0.09	0.12	0.62	0.62	5.9	0.515	0.000847	0.08	0.2	1	0.71	6.11	0.715	0.044946	45.1	6.11	5.9	0.715	2L_16665111_16665161_FBgn0032593_-	AAGGTGAGC	AAGCCAATTCCTCCGTTCAGACC	9.6	3.65	50
2L_9327961_9328012_FBgn0032109_+	CG17005	0.14	0.15	0.83	0.89	5.93	0.715	0.001804	0.18	0.18	0.84	0.85	4.69	0.665	5.7e-05	42.31	5.93	4.69	0.715	2L_9327961_9328012_FBgn0032109_+	GGGGTGAGA	AATCATTAACCTATGCCCAGCTT	4.74	0.86	51
3L_19953414_19953462_FBgn0261507_-	CG42655	0.33	0.26	1	1.02	3.42	0.715	0.002582	0.25	0.27	0.83	0.68	2.9	0.495	0.022577	18.37	3.42	2.9	0.715	3L_19953414_19953462_FBgn0261507_-	CGGGTAAAG	TTAAATTTGCTGAATTTCAGACT	6.23	5.86	48
3R_10814559_10814612_FBgn0037837_-	CG14693	0.07	0.06	0.73	0.64	10.54	0.62	0.005291	0.06	0.05	0.88	0.66	14	0.715	0.022906	37.04	14	10.54	0.715	3R_10814559_10814612_FBgn0037837_-	CCAGTGAAG	CTGACTTTGGGTTTCTTTAGAAA	-4.79	7.66	53
2R_9085893_9085944_FBgn0033372_-	CG13742	0.14	0.38	1	0.94	3.73	0.71	0.029036	0.33	0.22	0.78	0.78	2.84	0.505	0.011655	38.46	3.73	2.84	0.71	2R_9085893_9085944_FBgn0033372_-	AAGGTAAGG	ACTACTTACTGAGCCCACAGATG	10.51	2.1	51
3L_9630104_9630158_FBgn0036020_+	CG8336	0.59	0.54	1.25	1.3	2.26	0.71	0.00247	0.57	0.52	0.71	0.72	1.31	0.17	0.02176	32.73	2.26	1.31	0.71	3L_9630104_9630158_FBgn0036020_+	AAGGTAAAC	ATAATATCAGTTTGAACTAGTCT	8.14	-1.29	54
X_15055318_15055370_FBgn0030600_-	hiw	1	1	1.67	1.75	1.71	0.71	0.003159	0.33	0.4	0.53	0.56	1.49	0.18	0.041957	22.64	1.71	1.49	0.71	X_15055318_15055370_FBgn0030600_-	AAGGTGAAC	TCAATAATATTCATTTATAGACA	5.54	6.67	52
3L_1545606_1545652_FBgn0052313_-	CG32313	0.06	0.03	0.71	0.79	16.67	0.705	0.003652	0.05	0.03	0.53	0.6	14.12	0.525	0.004773	38.3	16.67	14.12	0.705	3L_1545606_1545652_FBgn0052313_-	GTAGTACGA	GAGAACCCATTTCCTTCTAGTGC	-0.25	5.74	46
3L_5369721_5369783_FBgn0265708_+	CR44515	0.64	0.43	1.06	1	1.93	0.495	0.045381	0.6	0.43	1.24	1.2	2.37	0.705	0.014997	46.03	2.37	1.93	0.705	3L_5369721_5369783_FBgn0265708_+	TGCGTGAGT	TCAGTTTTCCACTAAACCAGGCA	7.55	4.49	62
2R_10731553_10731658_FBgn0033544_+	CG7220	0.4	0.34	1.06	1.08	2.89	0.7	0.002035	0.52	0.49	0.58	0.57	1.14	0.07	0.047421	40.57	2.89	1.14	0.7	2R_10731553_10731658_FBgn0033544_+	TTTGTACGT	TAAAAGCAGACTTTACGCAGAGC	3.25	-3.17	105
2R_11381029_11381572_FBgn0033631_-	Sod3	0.14	0.16	0.23	0.21	1.47	0.07	0.038476	0.35	0.37	1	1.12	2.94	0.7	0.007467	42.1	2.94	1.47	0.7	2R_11381029_11381572_FBgn0033631_-	CAAGTAAAT	TCACATTGTATGTTTTCCAGTGG	4.44	7.05	543
2R_13213932_13214070_FBgn0033807_-	AQP	0.64	0.41	1.28	1.17	2.33	0.7	0.0316	0.46	0.48	0.93	0.94	1.99	0.465	0.000578	31.65	2.33	1.99	0.7	2R_13213932_13214070_FBgn0033807_-	CATGTAAGA	AGTGTCATTCCAAAACGCAGGAC	5.58	2.79	138
2R_14374787_14374843_FBgn0033931_-	Obp50e	0.12	0	0.64	0.53	9.75	0.525	0.023203	0.11	0	0.65	0.86	13.73	0.7	0.027496	38.6	13.73	9.75	0.7	2R_14374787_14374843_FBgn0033931_-	ACGGTGCGT	TTATGCCTATTCAATTTCAGTTA	10.25	8.52	56
3L_17792429_17792483_FBgn0261998_-	CG42816	0.05	0.07	0.72	0.79	12.58	0.695	0.002732	0.04	0.06	0.6	0.77	13.7	0.635	0.017686	36.36	13.7	12.58	0.695	3L_17792429_17792483_FBgn0261998_-	TAAGTATGT	GCCTATATTACCCCTTTCAGTAT	4.58	6.48	54
3R_31035449_31035506_FBgn0053773_+	CG33773	0.03	0.05	0.67	0.8	18.38	0.695	0.008835	0.03	0.07	0.56	0.71	12.7	0.585	0.017154	20.69	18.38	12.7	0.695	3R_31035449_31035506_FBgn0053773_+	AAAGTACGT	AATATGAACATTTATTCAAGACA	7.99	-0.27	57
3R_7365972_7366026_FBgn0004172_+	Mst84Da	0.01	0.01	0.67	0.68	67.5	0.665	5.7e-05	0.02	0.01	0.71	0.71	47.33	0.695	5.2e-05	30.91	67.5	47.33	0.695	3R_7365972_7366026_FBgn0004172_+	GGGGTATGT	CTTTTAATATGATTTATCAGGGC	7.48	7.62	54
2L_5580911_5580965_FBgn0031722_-	CG14011	0.01	0.01	0.68	0.69	68.5	0.675	5.5e-05	0.06	0.06	0.73	0.77	12.5	0.69	0.000839	41.82	68.5	12.5	0.69	2L_5580911_5580965_FBgn0031722_-	AAGGTAGGT	ACTCAGAAGAGGAATCCTAGGAA	10.29	-13.18	54
2R_13784212_13784265_FBgn0264358_+	CR43810	0.12	0.13	0.92	0.71	6.52	0.69	0.022431	0.12	0.15	0.72	0.66	5.11	0.555	0.003632	40.74	6.52	5.11	0.69	2R_13784212_13784265_FBgn0264358_+	TAGGTGGAA	ATTTTGAGCCACGCCCACAGATA	-2.76	3.73	53
2R_24474396_24474446_FBgn0035008_+	CG3494	0.3	0.31	0.98	1.01	3.26	0.69	0.000525	0.26	0.26	0.68	0.71	2.67	0.435	0.001187	37.25	3.26	2.67	0.69	2R_24474396_24474446_FBgn0035008_+	TCAGTAAGT	ATCGATTCATTCTGTACTAGGTA	9.14	5.98	50
3R_25920542_25920602_FBgn0250757_+	CG42235	0	0	0.6	0.78	NA	0.69	0.016591	0.11	0	0.52	0.7	11.09	0.555	0.034271	22.95	11.09	11.09	0.69	3R_25920542_25920602_FBgn0250757_+	ATAGTAAGT	TTAAACATCTTTTTTAATAGCGA	8.65	6.48	60
3L_4031437_4031494_FBgn0045477_+	Gr64c	0.4	0.33	1.1	1	2.88	0.685	0.007845	0.33	0.5	1	0.88	2.27	0.525	0.037102	27.59	2.88	2.27	0.685	3L_4031437_4031494_FBgn0045477_+	TCAGTGAGT	CTATGGTTTTTATTTTTCAGATC	7.68	11.1	57
3L_4031437_4031494_FBgn0045478_+	Gr64b	0.4	0.33	1.1	1	2.88	0.685	0.007845	0.33	0.5	1	0.88	2.27	0.525	0.037102	27.59	2.88	2.27	0.685	3L_4031437_4031494_FBgn0045478_+	TCAGTGAGT	CTATGGTTTTTATTTTTCAGATC	7.68	11.1	57
3R_16359644_16359697_FBgn0259917_-	CG42446	0.15	0.16	0.62	0.57	3.84	0.44	0.003341	0.14	0.14	0.88	0.77	5.89	0.685	0.006385	24.07	5.89	3.84	0.685	3R_16359644_16359697_FBgn0259917_-	GAGGTCAGT	ATAAGATTTGTTTTTATTAGACT	7.7	4.06	53
2L_16680651_16680705_FBgn0267347_+	squ	0.09	0.08	0.76	0.77	9	0.68	0.000108	0.12	0.1	0.4	0.45	3.86	0.315	0.007228	30.91	9	3.86	0.68	2L_16680651_16680705_FBgn0267347_+	TAGGTGAGT	ACAAATAAATTTCGCCTAAGACA	8.83	-0.53	54
2R_23602324_23602373_FBgn0262845_-	CG43209	0.04	0.05	0.71	0.74	16.11	0.68	0.00054	0.04	0.04	0.56	0.58	14.25	0.53	0.000356	44	16.11	14.25	0.68	2R_23602324_23602373_FBgn0262845_-	ATGGTAAGT	AATCCACAATTTCCATGCAGCAA	11.01	5.53	49
3L_1545606_1545655_FBgn0052313_-	CG32313	0.09	0.05	0.71	0.79	10.71	0.68	0.004297	0.05	0.03	0.53	0.6	14.12	0.525	0.004773	38	14.12	10.71	0.68	3L_1545606_1545655_FBgn0052313_-	GAGGTAGTA	GAGAACCCATTTCCTTCTAGTGC	4.45	5.74	49
3L_8926795_8928015_FBgn0035936_+	Tsp66E	0	0	0.5	0.33	NA	0.415	0.039483	0	0	0.56	0.8	NA	0.68	0.029759	37.59	0	0	0.68	3L_8926795_8928015_FBgn0035936_+	GAGGTAAGA	CTTTTTCGTTTCCATTACAGCAA	10.06	9.62	1220
3R_20986084_20986146_FBgn0013995_+	Calx	0.08	0.07	0.81	0.7	10.07	0.68	0.006531	0.09	0.08	0.69	0.68	8.06	0.6	0.000139	65.08	10.07	8.06	0.68	3R_20986084_20986146_FBgn0013995_+	CAGGTGAGT	GCATCCCGTTATCTCACCAGTAC	10.67	5.62	62
3R_3061174_3061234_FBgn0267430_-	Pzl	0.12	0	0.44	0.5	7.83	0.41	0.025741	0.07	0	0.6	0.83	20.43	0.68	0.029857	22.95	20.43	7.83	0.68	3R_3061174_3061234_FBgn0267430_-	ATGGTAGGT	TTGGTTACCATTACCAAAAGTAA	8.6	-1.34	60
3R_6642033_6642083_FBgn0051286_+	CG31286	0.04	0.03	0.71	0.72	20.43	0.68	0.000108	0.04	0.03	0.71	0.7	20.14	0.67	0.000111	33.33	20.43	20.14	0.68	3R_6642033_6642083_FBgn0051286_+	AGAGTATGA	TCCTAATCGTATTGTTATAGAGA	1.79	4.45	50
2L_10790368_10790415_FBgn0051870_+	CG31870	0.04	0.03	0.67	0.75	20.29	0.675	0.003548	0.04	0.03	0.63	0.71	19.14	0.635	0.004006	39.58	20.29	19.14	0.675	2L_10790368_10790415_FBgn0051870_+	ATGGTAGGT	CAATGCGCATATCCTTTCAGTAT	8.6	5.58	47
2L_10790368_10790426_FBgn0051870_+	CG31870	0.04	0.03	0.67	0.75	20.29	0.675	0.003548	0.27	0.26	0.72	0.78	2.83	0.485	0.003909	35.59	20.29	2.83	0.675	2L_10790368_10790426_FBgn0051870_+	ATGGTAGGT	TCCTTTCAGTATTTTGTAAGGAC	8.6	-0.4	58
2L_5580903_5580965_FBgn0031722_-	CG14011	0.01	0.01	0.68	0.69	68.5	0.675	5.5e-05	0.81	0.8	1.03	1.1	1.32	0.26	0.017994	41.27	68.5	1.32	0.675	2L_5580903_5580965_FBgn0031722_-	AAGGTAGGT	GAGGAATCCTAGGAAAGAAGAGC	10.29	-17.1	62
2L_5580906_5580965_FBgn0031722_-	CG14011	0.01	0.01	0.68	0.69	68.5	0.675	5.5e-05	0.8	0.79	1.05	1.1	1.35	0.28	0.008189	41.67	68.5	1.35	0.675	2L_5580906_5580965_FBgn0031722_-	AAGGTAGGT	GAAGAGGAATCCTAGGAAAGAAG	10.29	-14.43	59
2R_12632743_12632795_FBgn0053792_+	CG33792	0.22	0.18	0.75	1	4.38	0.675	0.033418	0.2	0.27	0.75	0.67	3.02	0.475	0.01229	26.42	4.38	3.02	0.675	2R_12632743_12632795_FBgn0053792_+	ATTGTGCGT	AAAAATATTTTAGTTTTTAGTTC	3.71	0.58	52
2R_16955678_16955737_FBgn0265174_+	PIG-V	0.15	0.19	0.84	0.85	4.97	0.675	0.000931	0.22	0.25	0.81	0.82	3.47	0.58	0.000742	51.67	4.97	3.47	0.675	2R_16955678_16955737_FBgn0265174_+	GAGGTATGC	GATAATCGACTCCACCCAAGACC	9.12	-1.43	59
3L_1400736_1400798_FBgn0052320_+	CG32320	0	0.03	0.7	0.68	46	0.675	0.000713	0	0.03	0.58	0.63	40.33	0.59	0.002433	28.57	46	40.33	0.675	3L_1400736_1400798_FBgn0052320_+	GAAGTGAGA	TATTGAAAATTGTTTTCTAGAAC	3.22	6.47	62
3L_4037388_4037446_FBgn0052255_+	Gr64f	0.29	0.07	0.75	0.71	4.06	0.55	0.038926	0.17	0.13	0.86	0.79	5.5	0.675	0.003548	27.12	5.5	4.06	0.675	3L_4037388_4037446_FBgn0052255_+	AGTGTAAGA	TATGATATCCACTTACTTAGGTG	4.57	6.04	58
3R_30002387_30002446_FBgn0039734_+	Tace	0.19	0.33	0.81	0.9	3.29	0.595	0.019005	0.24	0.41	1	1	3.08	0.675	0.01549	40	3.29	3.08	0.675	3R_30002387_30002446_FBgn0039734_+	AAGGTATGG	GCCTTTCCATTCCTTAACAGAAA	9.26	10.03	59
3R_7391964_7392015_FBgn0261502_+	CG42650	0.01	0.03	0.59	0.57	29	0.56	0.000637	0.01	0.03	0.66	0.73	34.75	0.675	0.002895	26.92	34.75	29	0.675	3R_7391964_7392015_FBgn0261502_+	GAAGTAAGA	TTAAAATTCATTCAATGCAGAGT	6.42	5.71	51
X_15857546_15857640_FBgn0002914_-	Myb	0.2	0.23	0.9	0.88	4.14	0.675	0.000713	0.17	0.22	0.69	0.61	3.33	0.455	0.010577	33.68	4.14	3.33	0.675	X_15857546_15857640_FBgn0002914_-	GTGGTAATT	AACTTGCATCTGCTTTTTAGTTC	5.8	5.53	94
2L_10888218_10888275_FBgn0032312_-	CG14071	0.13	0.11	0.38	0.5	3.67	0.32	0.034285	0.11	0.07	0.73	0.79	8.44	0.67	0.002883	32.76	8.44	3.67	0.67	2L_10888218_10888275_FBgn0032312_-	CAAGTATGT	CATGTATTTGTATTCTCCAGCTT	7.44	7.27	57
2L_17085813_17085863_FBgn0264367_+	CR43819	0.44	0.39	1.03	1.14	2.61	0.67	0.008033	0.38	0.34	0.86	1.02	2.61	0.58	0.019621	49.02	2.61	2.61	0.67	2L_17085813_17085863_FBgn0264367_+	TGGGTAAGG	ACAGGAAACACAATCCACAGGCG	9.08	0.99	50
2L_4795976_4796092_FBgn0031628_+	CG3294	0.21	0.3	0.95	0.81	3.45	0.625	0.01727	0.27	0.14	1	0.75	4.27	0.67	0.041487	32.48	4.27	3.45	0.67	2L_4795976_4796092_FBgn0031628_+	GCCGTATCC	AACACGTAAATGTCCCAAAGGTA	-3.93	3.58	116
2L_740691_740799_FBgn0026438_-	Eaat2	0.2	0	0.67	0.67	6.7	0.57	0.029427	0	0	0.67	0.67	NA	0.67	0	33.94	6.7	6.7	0.67	2L_740691_740799_FBgn0026438_-	TAGGTAAGT	ATGTACTACTTTTCCGACAGGAC	9.66	8.15	108
2R_21590391_21590452_FBgn0053225_+	CG33225	0.39	0.35	0.99	1.09	2.81	0.67	0.006398	0.33	0.31	0.76	0.85	2.52	0.485	0.008913	38.71	2.81	2.52	0.67	2R_21590391_21590452_FBgn0053225_+	TATGTGAGT	GTTTTCTTTACAACATGAAGATC	5.56	1.39	61
2R_24076284_24076345_FBgn0259209_+	Mlp60A	0	0	0.67	0.67	NA	0.67	0	0	0	0.5	0.75	NA	0.625	0.03775	50	0	0	0.67	2R_24076284_24076345_FBgn0259209_+	AAGGTGAAC	GGTGGTGTTCTTTATCGCAGGGT	5.54	7.16	61
3L_10412902_10412961_FBgn0036082_+	CG12362	0.56	0.68	1.32	1.26	2.08	0.67	0.009876	0.44	0.48	0.76	0.75	1.64	0.295	0.004848	40	2.08	1.64	0.67	3L_10412902_10412961_FBgn0036082_+	GTGGTCTGT	ATGAGTCTCTATTCCATCAGGCC	1.09	5.76	59
3L_19304074_19304139_FBgn0003089_-	pip	0	0	0.67	0.5	NA	0.585	0.020466	0	0	0.67	0.67	NA	0.67	0	36.36	0	0	0.67	3L_19304074_19304139_FBgn0003089_-	AAAGTAGGT	TTCTCAATCCTTAAAAACAGTGC	6.84	4.6	65
3R_15767240_15767305_FBgn0038357_-	CG5623	0.08	0.07	0.73	0.76	9.93	0.67	0.000556	0.07	0.06	0.67	0.67	10.31	0.605	6.8e-05	36.36	10.31	9.93	0.67	3R_15767240_15767305_FBgn0038357_-	GTTGTAAGT	AATGTTTGAATTCCGATTAGCGG	8.3	2.47	65
3L_2631917_2631976_FBgn0035357_+	MEP-1	0.03	0.04	0.69	0.71	20	0.665	0.000283	0.04	0.06	0.63	0.54	11.7	0.535	0.007343	46.67	20	11.7	0.665	3L_2631917_2631976_FBgn0035357_+	AAGGTGAGT	GATATATAACCATTGGTTAGCGT	10.47	-0.87	59
3L_2631917_2631976_FBgn0250911_+	CG42245	0.03	0.04	0.69	0.71	20	0.665	0.000283	0.04	0.06	0.63	0.54	11.7	0.535	0.007343	46.67	20	11.7	0.665	3L_2631917_2631976_FBgn0250911_+	AAGGTGAGT	GATATATAACCATTGGTTAGCGT	10.47	-0.87	59
3R_31590284_31590340_FBgn0266700_-	CR45190	0.4	0.38	1.11	1	2.71	0.665	0.006993	0.25	0.35	0.85	0.67	2.53	0.46	0.046619	35.09	2.71	2.53	0.665	3R_31590284_31590340_FBgn0266700_-	CTGGTAATT	ATCTTGAGTAACAATCACAGGCT	5.99	-0.54	56
2L_11115586_11115659_FBgn0041246_+	Gr32a	0.05	0	0.63	0.74	27.4	0.66	0.008275	0.16	0.07	0.77	0.75	6.61	0.645	0.005069	32.43	27.4	6.61	0.66	2L_11115586_11115659_FBgn0041246_+	AAGGTATAT	TATTTGCTGTTTATTTTCAGATA	7.84	9.46	73
3L_2244611_2244665_FBgn0052301_+	CG32301	0.61	0.51	1.36	1.08	2.18	0.66	0.047174	0.46	0.38	0.77	0.9	1.99	0.415	0.032197	43.64	2.18	1.99	0.66	3L_2244611_2244665_FBgn0052301_+	CGGGTATGC	CAAGTACCATTCAATTGCAGTAC	7.73	4.12	54
3L_9719067_9719115_FBgn0036035_-	CG18178	0.62	0.36	1.23	1.07	2.35	0.66	0.049548	0.16	0.18	0.45	0.48	2.74	0.295	0.003714	38.78	2.74	2.35	0.66	3L_9719067_9719115_FBgn0036035_-	TTGGTAAGC	TTTGATTAGTCGGCCTTTAGTTT	8.72	0.05	48
3R_10754148_10754209_FBgn0037829_-	CG14691	0.78	0.74	1.01	0.99	1.32	0.24	0.008569	0.08	0.06	0.78	0.68	10.43	0.66	0.005916	41.94	10.43	1.32	0.66	3R_10754148_10754209_FBgn0037829_-	CTAGTGGGT	TAATAAATTCTATCGTTCAGCAT	1.46	4.58	61
3R_9573596_9573793_FBgn0037715_-	CG9399	0.45	0.35	1	1.12	2.65	0.66	0.013716	0.38	0.38	0.55	0.65	1.58	0.22	0.047967	40.4	2.65	1.58	0.66	3R_9573596_9573793_FBgn0037715_-	GTTGTAGGT	TTTTATTTTGTGATTGCCAGCCA	2.38	5.17	197
3L_19953499_19953549_FBgn0261507_-	CG42655	0.06	0.15	0.73	0.71	6.86	0.615	0.005571	0.07	0.12	0.73	0.77	7.89	0.655	0.002381	21.57	7.89	6.86	0.655	3L_19953499_19953549_FBgn0261507_-	TTCGTAAAT	TTTTTAATTATATATTACAGGAT	-3.95	8.4	50
3L_20465541_20465620_FBgn0261832_-	CG42764	0.28	0.37	0.97	0.99	3.02	0.655	0.004917	0.27	0.33	0.76	0.75	2.52	0.455	0.004438	11.25	3.02	2.52	0.655	3L_20465541_20465620_FBgn0261832_-	AGGGTAATT	AATTATGCTACTTCTAACAGCCT	6.62	5.06	79
3L_6666382_6666443_FBgn0266683_-	CR45173	0.18	0.23	0.78	0.88	4.05	0.625	0.007905	0.19	0.21	0.85	0.86	4.27	0.655	0.000291	35.48	4.27	4.05	0.655	3L_6666382_6666443_FBgn0266683_-	TACGTAGCT	TATTTTCACTTTTATGGCAGGCA	-1.98	5.94	61
2L_11115439_11115495_FBgn0041246_+	Gr32a	0.08	0.04	0.69	0.65	11.17	0.61	0.002143	0.08	0.04	0.67	0.75	11.83	0.65	0.0047	31.58	11.83	11.17	0.65	2L_11115439_11115495_FBgn0041246_+	ATCGTAAGT	GCTAAGGGTTTCATTACCAGATT	10.44	3.03	56
2L_11646890_11646946_FBgn0032369_-	CG6614	0.12	0.12	0.72	0.82	6.42	0.65	0.005865	0.11	0.14	0.82	0.69	6.04	0.63	0.011027	26.32	6.42	6.04	0.65	2L_11646890_11646946_FBgn0032369_-	AGAGTGGGT	GTTATCCATTAATCGATAAGGAA	1.31	-0.12	56
3R_14236739_14236801_FBgn0262983_-	CG43291	0	0	0.5	0.5	NA	0.5	0	0	0	0.5	0.8	NA	0.65	0.049346	19.05	0	0	0.65	3R_14236739_14236801_FBgn0262983_-	GATGTGAGT	ATTGAATACATGATATATAGACG	7.77	-1.95	62
3R_18397504_18399811_FBgn0264751_+	Vti1b	0.38	0.15	0.83	1	3.45	0.65	0.04515	0.78	0.75	0.91	0.93	1.2	0.155	0.013259	43.46	3.45	1.2	0.65	3R_18397504_18399811_FBgn0264751_+	TGTGTGAGT	ATGTCCTACGCCGGCTATAGCCA	5.84	2.59	2307
3R_25123484_25123631_FBgn0046214_+	vig2	0.61	0.77	1.37	1.31	1.94	0.65	0.016843	0.47	0.46	0.54	0.56	1.18	0.085	0.016865	41.89	1.94	1.18	0.65	3R_25123484_25123631_FBgn0046214_+	TGCGTAAGT	GGTTCAATTTTAATCCGTAGAAA	9.73	6.91	147
3R_6122711_6122772_FBgn0037402_+	Vha14-2	0.5	0.42	1.17	1.05	2.41	0.65	0.012085	0.43	0.35	0.7	0.7	1.79	0.31	0.016245	35.48	2.41	1.79	0.65	3R_6122711_6122772_FBgn0037402_+	GAGGTTTGA	CCCACACACAATTTACCCAGGAC	3.11	4.12	61
X_1820119_1820182_FBgn0029589_-	CG14810	0.14	0.16	0.85	0.75	5.33	0.65	0.006098	0.64	0.72	0.91	0.93	1.35	0.24	0.028268	34.38	5.33	1.35	0.65	X_1820119_1820182_FBgn0029589_-	TCGGTATGT	ATTGTATTCCCTTGAAGAAGAAC	9.22	-2.73	63
X_1820122_1820182_FBgn0029589_-	CG14810	0.14	0.16	0.85	0.75	5.33	0.65	0.006098	0.12	0.12	0.77	0.74	6.29	0.635	0.000558	34.43	6.29	5.33	0.65	X_1820122_1820182_FBgn0029589_-	TCGGTATGT	ATAATTGTATTCCCTTGAAGAAG	9.22	4.56	60
2R_10110174_10110231_FBgn0003071_+	Pfk	0.02	0.02	0.61	0.6	30.25	0.585	7.3e-05	0.03	0.02	0.69	0.65	26.8	0.645	0.00102	27.59	30.25	26.8	0.645	2R_10110174_10110231_FBgn0003071_+	TTCGTATGT	TCTTCCTTTTACTTGCTTAGAGG	4.58	7.02	57
2R_14668439_14668498_FBgn0033955_+	CG12866	0.26	0.12	0.86	0.81	4.39	0.645	0.013022	0.21	0.13	0.63	0.52	3.38	0.405	0.027058	50	4.39	3.38	0.645	2R_14668439_14668498_FBgn0033955_+	AAGGTGACT	CAAATCCCTCTGTTTTTCAGCTT	6.64	7.59	59
2R_19946525_19946571_FBgn0261581_-	CG42691	0.08	0.07	0.58	0.64	8.13	0.535	0.003216	0.1	0.09	0.7	0.78	7.79	0.645	0.003883	23.4	8.13	7.79	0.645	2R_19946525_19946571_FBgn0261581_-	TAGGTAAAA	TATATTAGTTAATTTCGTAGCCA	6.02	0.78	46
3R_27872230_27872292_FBgn0039552_-	CG12426	0.03	0.03	0.71	0.64	22.5	0.645	0.002932	0.02	0.02	0.55	0.52	26.75	0.515	0.000847	47.62	26.75	22.5	0.645	3R_27872230_27872292_FBgn0039552_-	GCGGTGACT	TATCTGCCTTTGTCCATCAGGTC	4.06	9.49	62
2L_10242965_10245877_FBgn0266330_+	CR44995	0.43	0.41	1.07	1.05	2.52	0.64	0.000488	0.5	0.38	1.04	0.93	2.24	0.545	0.021585	43.46	2.52	2.24	0.64	2L_10242965_10245877_FBgn0266330_+	TTGGTGAGT	TTTGGCTCGGCTCTTTGCAGGAA	9.27	8.38	2912
2R_11864307_11864371_FBgn0260436_+	CG42531	0.11	0.07	0.73	0.73	8.11	0.64	0.000975	0.08	0.04	0.55	0.57	9.33	0.5	0.001994	46.15	9.33	8.11	0.64	2R_11864307_11864371_FBgn0260436_+	GTCGTAAGT	TGCATCCCACCTTCATCTAGAGG	9.9	6.17	64
2R_6683256_6683315_FBgn0033090_+	CG15909	0.04	0	0.79	0.53	33	0.64	0.039736	0.06	0.04	0.61	0.49	11	0.5	0.014479	33.33	33	11	0.64	2R_6683256_6683315_FBgn0033090_+	ATGGTGAAT	TAACCAATCAATCTGCACAGGTA	3.54	6.08	59
3R_16049161_16049220_FBgn0266739_-	CR45212	0.02	0.03	0.21	0.15	7.2	0.155	0.036412	0.07	0.25	0.72	0.88	5	0.64	0.033625	26.67	7.2	5	0.64	3R_16049161_16049220_FBgn0266739_-	TTGGTGAGC	ATACATATAAATATTTTAAGGAT	7.43	3.67	59
3R_29027029_29027078_FBgn0039622_-	eIF4E6	0.15	0.27	0.91	0.79	4.05	0.64	0.017128	0.1	0.23	0.69	0.66	4.09	0.51	0.016682	28	4.09	4.05	0.64	3R_29027029_29027078_FBgn0039622_-	ATTGTAAGT	CTACGAATGCATTTTAAAAGGGG	8.54	1.96	49
X_5864969_5865028_FBgn0262611_-	CG43137	0.01	0	0.71	0.58	129	0.64	0.010217	0.02	0.01	0.61	0.52	37.67	0.55	0.006709	38.33	129	37.67	0.64	X_5864969_5865028_FBgn0262611_-	CAGGTAAAA	TATTTCCACTGCCTGTTCAGAAT	8.59	6.11	59
2L_2592010_2592070_FBgn0250835_+	CG15394	0.62	0.69	1.09	1.16	1.72	0.47	0.01091	0.44	0.49	1	1.2	2.37	0.635	0.025352	36.07	2.37	1.72	0.635	2L_2592010_2592070_FBgn0250835_+	AGAGTGAGT	CTAATTTATGGAGTGTTTAGCAA	7.36	-3.86	60
2R_10761098_10761176_FBgn0263802_+	CR43605	0.07	0.12	0.58	0.6	6.21	0.495	0.002946	0.03	0.06	0.62	0.74	15.11	0.635	0.009353	41.77	15.11	6.21	0.635	2R_10761098_10761176_FBgn0263802_+	AGCGTATGT	CTCACTCCCTCCCTAATTAGCTT	6.12	7.71	78
2R_21142488_21142545_FBgn0034592_+	CG9406	0.01	0.01	0.68	0.61	64.5	0.635	0.003024	0.03	0.02	0.58	0.55	22.6	0.54	0.000856	41.38	64.5	22.6	0.635	2R_21142488_21142545_FBgn0034592_+	GTGGTAGGC	ATATCACTAACCTTTTGTAGTTA	5.59	4.22	57
3L_8125039_8125092_FBgn0042112_-	mRpL36	0.13	0.22	0.84	0.78	4.63	0.635	0.007176	0.14	0.16	0.51	0.45	3.2	0.33	0.009058	29.63	4.63	3.2	0.635	3L_8125039_8125092_FBgn0042112_-	AAGGTGAGC	AATGAAAATGCAAATTTCAGATG	9.6	2.56	53
3R_17911695_17911766_FBgn0263399_+	CG43445	0.03	0.03	0.77	0.56	22.17	0.635	0.026269	0.06	0	0.73	0.53	21	0.6	0.028969	45.83	22.17	21	0.635	3R_17911695_17911766_FBgn0263399_+	CTGGTACGT	CTCATGAATTGATAATGCAGCAG	9.57	0.86	71
2L_3538005_3538067_FBgn0265367_+	CR44308	0.04	0.04	0.59	0.58	14.62	0.545	8.4e-05	0.08	0.1	0.69	0.75	8	0.63	0.00251	36.51	14.62	8	0.63	2L_3538005_3538067_FBgn0265367_+	CAAGTAAGC	ATTAGTTTCTCCTTCAAAAGGAA	7.47	4.49	62
2L_4454995_4455055_FBgn0040705_+	ND-B8	0.08	0.1	0.55	0.59	6.33	0.48	0.002163	0.09	0.07	0.67	0.75	8.88	0.63	0.004256	52.46	8.88	6.33	0.63	2L_4454995_4455055_FBgn0040705_+	ATGGTGAGT	ATCGATTCCCATGTCCGCAGGCA	10.13	8.02	60
2L_9436870_9436928_FBgn0085211_+	RpS28-like	1.75	1.53	2.22	2.32	1.38	0.63	0.034872	0.71	0.7	0.83	0.85	1.19	0.135	0.006789	23.73	1.38	1.19	0.63	2L_9436870_9436928_FBgn0085211_+	TAGGTCTGA	TTATCAATTTATTACCACAGCTA	1.23	6.34	58
3R_18560054_18560119_FBgn0038626_+	CG7691	0.5	0.51	0.97	0.91	1.86	0.435	0.004853	0.54	0.52	1.2	1.12	2.19	0.63	0.004256	37.88	2.19	1.86	0.63	3R_18560054_18560119_FBgn0038626_+	AATGTAATT	ATGCATGCTTATCCCTCCAGAAT	1.5	6.94	65
2L_18840853_18840913_FBgn0051752_-	CG31752	0.03	0.02	0.69	0.59	25.6	0.615	0.00661	0.04	0.02	0.68	0.63	21.83	0.625	0.001851	22.95	25.6	21.83	0.625	2L_18840853_18840913_FBgn0051752_-	AAGGTAAGC	AATACCTTAACAAACGGAAGTGG	10.22	-6.2	60
2L_22065197_22065260_FBgn0260996_-	CG42597	0.06	0.07	0.71	0.67	10.62	0.625	0.001086	0.05	0.07	0.56	0.57	9.42	0.505	0.00049	39.06	10.62	9.42	0.625	2L_22065197_22065260_FBgn0260996_-	CAGGCAAGT	AACCAATATCCCTTTCTAAGGAA	3.1	5.1	63
2R_10050561_10050621_FBgn0265342_+	CG44296	0.02	0.01	0.52	0.53	35	0.51	0.000192	0.04	0.03	0.65	0.67	18.86	0.625	0.00032	40.98	35	18.86	0.625	2R_10050561_10050621_FBgn0265342_+	GCGGTAGTT	ACTTACAATTTCCCTCACAGAAC	2.8	9.46	60
2R_15557048_15557528_FBgn0034031_+	CG12963	0.25	0.5	1	1	2.67	0.625	0.03775	0.02	0.03	0.5	0.67	23.4	0.56	0.022347	33.89	23.4	2.67	0.625	2R_15557048_15557528_FBgn0034031_+	GTTGTAAGT	ACCGTCTTTACCCCCAATAGTTG	8.3	5.72	480
3R_30039407_30039472_FBgn0001280_-	janA	0.15	0.16	0.78	0.78	5.03	0.625	6.4e-05	0.17	0.15	0.45	0.45	2.81	0.29	0.001187	36.36	5.03	2.81	0.625	3R_30039407_30039472_FBgn0001280_-	TTGGTAAGA	CCTCCAACTGCTTTCCAAAGGAC	8.85	5.92	65
3R_5137495_5137540_FBgn0040684_-	CG12589	0.63	0.89	1.34	1.43	1.82	0.625	0.045189	0.27	0.31	0.58	0.66	2.14	0.33	0.017875	28.26	2.14	1.82	0.625	3R_5137495_5137540_FBgn0040684_-	TATGTATGT	AATTTACCATTGCTGTGTAGCAC	3.25	3.62	45
3R_8244142_8244196_FBgn0042182_+	CG18749	0.24	0.21	0.84	0.86	3.78	0.625	0.000831	0.2	0.14	0.44	0.48	2.71	0.29	0.015108	45.45	3.78	2.71	0.625	3R_8244142_8244196_FBgn0042182_+	GAGGTGAGT	ACAGATACGTATCCTTGTAGGGA	10.03	4.46	54
3R_8244142_8244196_FBgn0064126_+	CG33722	0.24	0.21	0.84	0.86	3.78	0.625	0.000831	0.2	0.14	0.44	0.48	2.71	0.29	0.015108	45.45	3.78	2.71	0.625	3R_8244142_8244196_FBgn0064126_+	GAGGTGAGT	ACAGATACGTATCCTTGTAGGGA	10.03	4.46	54
2L_10191185_10191238_FBgn0051874_-	CG31874	0.04	0.01	0.65	0.64	25.8	0.62	0.00065	0.04	0.01	0.6	0.57	23.4	0.56	0.001432	27.78	25.8	23.4	0.62	2L_10191185_10191238_FBgn0051874_-	CCAGTATGA	TATGATCTCCAAAATCACAGCGA	2.36	3.75	53
2R_11779008_11779063_FBgn0260007_+	CG42493	0.05	0.06	0.66	0.6	11.45	0.575	0.002786	0.05	0.06	0.71	0.64	12.27	0.62	0.003236	30.36	12.27	11.45	0.62	2R_11779008_11779063_FBgn0260007_+	TAAGTATGT	ATAACATTTTTACATTTAAGTTG	4.58	5.12	55
2R_22714793_22714846_FBgn0050268_+	CG30268	0.04	0.1	0.81	0.57	9.86	0.62	0.037573	0.05	0.1	0.64	0.71	9	0.6	0.0051	31.48	9.86	9	0.62	2R_22714793_22714846_FBgn0050268_+	GAGGTGGGA	CATAATTGTTTCCTTTTTAGACC	4.3	9.45	53
3L_15823756_15823814_FBgn0036534_-	DCP2	0.34	0.34	0.82	0.87	2.49	0.505	0.002442	0.34	0.32	0.92	0.98	2.88	0.62	0.002591	45.76	2.88	2.49	0.62	3L_15823756_15823814_FBgn0036534_-	CGAGTATGA	TTTCACCGCCACGCCCACAGCGC	3.08	6.7	58
2R_13477495_13477548_FBgn0262821_+	CG43192	0.32	0.52	1	1.07	2.46	0.615	0.028419	0.34	0.45	0.88	0.84	2.18	0.465	0.015473	27.78	2.46	2.18	0.615	2R_13477495_13477548_FBgn0262821_+	TTTGTAAAT	TTTCATTAACTTTTCTTCAGTTC	-2.27	7.28	53
2R_16158601_16158679_FBgn0034082_-	CG10734	0.04	0.04	0.65	0.66	16.38	0.615	6.6e-05	0.05	0.05	0.59	0.59	11.8	0.54	0	37.97	16.38	11.8	0.615	2R_16158601_16158679_FBgn0034082_-	GAGGTAAGC	AACAACCCAATTCTTCTCAGAAG	9.85	4.05	78
2R_24984503_24984558_FBgn0010435_-	emp	0.03	0.03	0.61	0.68	21.5	0.615	0.003223	0.03	0.03	0.48	0.56	17.33	0.49	0.006598	35.71	21.5	17.33	0.615	2R_24984503_24984558_FBgn0010435_-	TGCGTACGC	ATTTATTGCATCATTTACAGCAA	2.66	6.29	55
3L_11057953_11058014_FBgn0036116_+	CG7888	0.11	0.08	0.75	0.67	7.47	0.615	0.004791	0.04	0.09	0.45	0.67	8.62	0.495	0.048209	40.32	8.62	7.47	0.615	3L_11057953_11058014_FBgn0036116_+	AAGGTGGGT	TAACGCAATCTCCCTGACAGATG	8.23	7.88	61
3R_7219294_7219357_FBgn0037486_-	CG14605	0.12	0.11	0.75	0.71	6.35	0.615	0.001122	0.12	0.13	0.73	0.74	5.88	0.61	0.000134	35.94	6.35	5.88	0.615	3R_7219294_7219357_FBgn0037486_-	GTGGTATGT	GGCACCATTGAGATTTCCAGGAT	7.64	-2.33	63
2L_2239129_2239191_FBgn0052463_-	Tengl2	0.19	0.21	0.76	0.74	3.75	0.55	0.000661	0.18	0.21	0.76	0.85	4.13	0.61	0.005992	31.75	4.13	3.75	0.61	2L_2239129_2239191_FBgn0052463_-	GTGGTAACC	AAAATAATTTCCCTAACCAGTTT	3.88	5.62	62
2L_817183_817243_FBgn0031283_-	CG15880	0.09	0.03	0.62	0.72	11.17	0.61	0.009014	0.08	0.03	0.57	0.66	11.18	0.56	0.008345	47.54	11.18	11.17	0.61	2L_817183_817243_FBgn0031283_-	TGGGTGAGT	AATCCCCGGATCCTCTGCAGCCT	8.73	5.47	60
2R_17794551_17795118_FBgn0028743_+	Dhit	0.02	0.01	0.62	0.63	41.67	0.61	0.000134	0.02	0.03	0.25	0.19	8.8	0.195	0.023473	30.46	41.67	8.8	0.61	2R_17794551_17795118_FBgn0028743_+	CAGGTAAGT	AATTTGTTCCTTTATTGCAGGTA	10.86	9.87	567
3R_25108024_25108076_FBgn0054027_-	CG34027	0.05	0	0.5	0.62	22.4	0.535	0.014442	0	0	0.6	0.62	NA	0.61	0.000269	16.98	22.4	22.4	0.61	3R_25108024_25108076_FBgn0054027_-	GAGGTATAT	TAAATAATTGTATATTTTAGGAC	7.3	8.92	52
3R_27871678_27871742_FBgn0039552_-	CG12426	0.03	0.03	0.55	0.51	17.67	0.5	0.001596	0.04	0.01	0.68	0.59	25.4	0.61	0.005992	46.15	25.4	17.67	0.61	3R_27871678_27871742_FBgn0039552_-	ATGGTATTT	TACTTGTCCTGAACCCGCAGGTC	3.85	9.05	64
2L_12918804_12918860_FBgn0040509_+	ACXB	0.03	0.02	0.73	0.53	25.2	0.605	0.026313	0.04	0.04	0.6	0.44	13	0.48	0.026671	24.56	25.2	13	0.605	2L_12918804_12918860_FBgn0040509_+	CAAGTAGGT	AAAATTAATATTGTGCACAGCAT	7.33	2.04	56
2L_155179_155249_FBgn0031228_+	ND-15	0.58	0.54	1.18	1.15	2.08	0.605	0.001703	0.57	0.54	0.91	0.87	1.6	0.335	0.005523	46.48	2.08	1.6	0.605	2L_155179_155249_FBgn0031228_+	CAGGTAACG	CAAATCCTGGTTTTTCATAGCTT	10.52	5.25	70
2L_22043701_22043755_FBgn0051601_-	CG31601	0.15	0.17	0.71	0.82	4.78	0.605	0.00843	0.14	0.15	0.55	0.62	4.03	0.44	0.006395	30.91	4.78	4.03	0.605	2L_22043701_22043755_FBgn0051601_-	AAGGTGAGA	CTTATACATGGTTGTTTAAGTGC	8.68	2.24	54
2R_17205255_17205308_FBgn0262882_+	CG43237	0.07	0.06	0.57	0.77	10.31	0.605	0.026313	0.05	0.05	0.47	0.56	10.3	0.465	0.009236	31.48	10.31	10.3	0.605	2R_17205255_17205308_FBgn0262882_+	AATGTAAGT	TGCTTATTCTTCTATTATAGTAT	8.62	7.51	53
2R_8707861_8707915_FBgn0033324_-	CG14744	0.06	0.1	0.58	0.79	8.56	0.605	0.029824	0.08	0.09	0.52	0.65	6.88	0.5	0.016578	49.09	8.56	6.88	0.605	2R_8707861_8707915_FBgn0033324_-	TAGGTATGC	TAAACCTCGCTGACCCTCAGCTG	7.53	3.55	54
3L_1603250_1603306_FBgn0035239_+	CG18170	0.05	0.07	0.69	0.64	11.08	0.605	0.001975	0.05	0.06	0.64	0.64	11.64	0.585	7.3e-05	40.35	11.64	11.08	0.605	3L_1603250_1603306_FBgn0035239_+	GGAGTGGGT	ATTGCCTTTTGATTTCGCAGACC	-0.71	10.03	56
3L_1603250_1603306_FBgn0035240_+	CG33791	0.05	0.07	0.69	0.64	11.08	0.605	0.001975	0.05	0.06	0.64	0.64	11.64	0.585	7.3e-05	40.35	11.64	11.08	0.605	3L_1603250_1603306_FBgn0035240_+	GGAGTGGGT	ATTGCCTTTTGATTTCGCAGACC	-0.71	10.03	56
3L_20973868_20973925_FBgn0053286_-	CG33286	0.03	0.05	0.62	0.58	15	0.56	0.001591	0.04	0.03	0.71	0.57	18.29	0.605	0.01319	37.93	18.29	15	0.605	3L_20973868_20973925_FBgn0053286_-	GGAGTCTGT	ACCACCTTTGTATGCCCTAGATC	-7.3	9.3	57
3R_23928780_23928836_FBgn0264740_-	CG43998	0.1	0.08	0.61	0.7	7.28	0.565	0.006591	0.1	0.06	0.64	0.73	8.56	0.605	0.00656	42.11	8.56	7.28	0.605	3R_23928780_23928836_FBgn0264740_-	GATGTGAGT	ATAACCAGTATAATGTTCAGTAT	7.77	-1.46	56
3R_23928780_23928836_FBgn0264741_-	CG43999	0.1	0.08	0.61	0.7	7.28	0.565	0.006591	0.1	0.06	0.64	0.73	8.56	0.605	0.00656	42.11	8.56	7.28	0.605	3R_23928780_23928836_FBgn0264741_-	GATGTGAGT	ATAACCAGTATAATGTTCAGTAT	7.77	-1.46	56
X_16083647_16083706_FBgn0030725_+	CG8958	0.04	0.02	0.64	0.56	20	0.57	0.005192	0.14	0.16	0.86	0.65	5.03	0.605	0.029075	30	20	5.03	0.605	X_16083647_16083706_FBgn0030725_+	CCGGTAAGG	ATATTCTGTATTGAGCTTAGAAA	10.19	0.97	59
2L_6160962_6161016_FBgn0031786_+	CG13989	0.03	0.02	0.63	0.62	25	0.6	0.000139	0.03	0.02	0.57	0.59	23.2	0.555	0.000406	47.27	25	23.2	0.6	2L_6160962_6161016_FBgn0031786_+	GCTGTAAGT	TAATCTGCTGCTGCCGACAGTAA	8.56	3.64	54
3L_19843130_19843193_FBgn0001324_+	kto	0.29	0.22	0.93	0.78	3.35	0.6	0.018501	0.23	0.17	0.46	0.46	2.3	0.26	0.013053	29.69	3.35	2.3	0.6	3L_19843130_19843193_FBgn0001324_+	TCGGTGCTA	CATATAAATTTTTTCCACAGATG	-1.7	9.96	63
3L_8583767_8585970_FBgn0262508_+	CG43078	0	0	0.5	0.7	NA	0.6	0.026671	0	0	0.5	0.46	NA	0.48	0.001732	38.48	0	0	0.6	3L_8583767_8585970_FBgn0262508_+	ATGGTGAGT	CCCATTTTTTTTTTATGTAGTGT	10.13	6.78	2203
3R_14799411_14799474_FBgn0038261_+	CG14856	0	0	0.6	0.6	NA	0.6	0	0	0	0.25	0.25	NA	0.25	0	45.31	0	0	0.6	3R_14799411_14799474_FBgn0038261_+	GATGTAAGT	GTAAGCTCTATTGTTTACAGCTG	9.11	5.55	63
3R_30618885_30618937_FBgn0266259_-	CG44954	0.17	0.18	0.88	0.67	4.43	0.6	0.02935	0.11	0.18	0.43	0.55	3.38	0.345	0.038228	41.51	4.43	3.38	0.6	3R_30618885_30618937_FBgn0266259_-	AAGGTAAAC	TGACTTATTGTTGAACCCAGGGA	8.14	5.19	52
2L_5543273_5543324_FBgn0002525_+	Lam	0.04	0.08	0.66	0.65	10.92	0.595	0.001198	0.01	0.04	0.15	0.17	6.4	0.135	0.017369	38.46	10.92	6.4	0.595	2L_5543273_5543324_FBgn0002525_+	GAGGTCAGT	ACATTTCATTTGTCTTGCAGCGT	7.7	9.93	51
2L_5970560_5970628_FBgn0031758_+	Ucp4B	0.1	0.09	0.7	0.68	7.26	0.595	0.000353	0.11	0.12	0.63	0.58	5.26	0.49	0.002696	42.03	7.26	5.26	0.595	2L_5970560_5970628_FBgn0031758_+	TAGGTGAGC	ATCACCCCTTCCTTCTAAAGGGG	7.96	8.27	68
2L_5970560_5970638_FBgn0031758_+	Ucp4B	0.1	0.09	0.7	0.68	7.26	0.595	0.000353	0.7	0.68	0.82	0.8	1.17	0.12	0.013606	45.57	7.26	1.17	0.595	2L_5970560_5970638_FBgn0031758_+	TAGGTGAGC	CCTTCTAAAGGGGACGTCAGCTG	7.96	-7.74	78
2L_9397765_9397832_FBgn0032115_-	CG4438	0.16	0.17	0.75	0.77	4.61	0.595	0.000353	0.67	0.67	0.87	0.88	1.31	0.205	0.000594	36.76	4.61	1.31	0.595	2L_9397765_9397832_FBgn0032115_-	ACCGTAAGT	ATGATAATCCAGGTACATAGAAA	10.43	-4.47	67
2L_9397773_9397832_FBgn0032115_-	CG4438	0.16	0.17	0.75	0.77	4.61	0.595	0.000353	0.09	0.11	0.65	0.67	6.6	0.56	0.000637	36.67	6.6	4.61	0.595	2L_9397773_9397832_FBgn0032115_-	ACCGTAAGT	ACAAACTTATGATAATCCAGGTA	10.43	3.4	59
2R_13862105_13862166_FBgn0033884_+	CG13344	0.14	0.13	0.71	0.75	5.41	0.595	0.001198	0.12	0.13	0.52	0.52	4.16	0.395	0.00016	33.87	5.41	4.16	0.595	2R_13862105_13862166_FBgn0033884_+	CGCGTAAGC	ACAATTGCGTACTCTTGCAGTTT	5.72	6.15	61
2R_6879808_6879858_FBgn0265058_+	CR44169	0.19	0.2	0.62	0.74	3.49	0.485	0.015063	0.21	0.22	0.8	0.82	3.77	0.595	0.000353	35.29	3.77	3.49	0.595	2R_6879808_6879858_FBgn0265058_+	TCTGTGAGT	CAATAACAAATCCATTTCAGCTA	7	3.36	50
3L_19953875_19953931_FBgn0261506_-	CG42654	0.12	0.07	0.75	0.63	7.26	0.595	0.011725	0.11	0.06	0.67	0.64	7.71	0.57	0.002606	24.56	7.71	7.26	0.595	3L_19953875_19953931_FBgn0261506_-	TAAGTGGGA	AATAACTTATTTTATTTTAGCAA	-3.67	6.55	56
3R_9404179_9404237_FBgn0037688_-	CG9356	0.63	0.55	1.13	1.24	2.01	0.595	0.012813	0.44	0.42	0.76	0.72	1.72	0.31	0.005163	20.34	2.01	1.72	0.595	3R_9404179_9404237_FBgn0037688_-	AAGGCAAAT	TGATAGTTTCAAACATTTAGGTC	1.13	4.45	58
X_19511346_19511396_FBgn0031023_+	CG14200	0.17	0.09	0.61	0.84	5.58	0.595	0.039416	0.16	0.14	0.59	0.7	4.3	0.495	0.012515	49.02	5.58	4.3	0.595	X_19511346_19511396_FBgn0031023_+	CGAGTAAGT	ATAAAGCCGTATTCCGACAGCAG	10.15	0.32	50
X_19511346_19511399_FBgn0031023_+	CG14200	0.17	0.09	0.61	0.84	5.58	0.595	0.039416	0.68	0.66	0.82	0.86	1.25	0.17	0.016865	50	5.58	1.25	0.595	X_19511346_19511399_FBgn0031023_+	CGAGTAAGT	AAGCCGTATTCCGACAGCAGGAG	10.15	-0.39	53
2L_3845335_3845389_FBgn0266318_-	CR44983	0.19	0.05	0.79	0.63	5.92	0.59	0.030962	0.62	0.5	1	1	1.79	0.44	0.018092	38.18	5.92	1.79	0.59	2L_3845335_3845389_FBgn0266318_-	CGCGTAATT	CGCGCAATTGTGATTTTCAGGGT	2.46	7.17	54
2L_6735731_6735783_FBgn0031853_+	TTLL3B	0.2	0.2	0.7	0.7	3.5	0.5	0	0.24	0.24	0.82	0.84	3.46	0.59	0.000287	24.53	3.5	3.46	0.59	2L_6735731_6735783_FBgn0031853_+	ACAGTAGGT	TGAAATATTTTCTTTTTAAGATC	5.67	8.89	52
2R_12395980_12396032_FBgn0050048_+	CG30048	0.05	0.02	0.64	0.61	17.86	0.59	0.00129	0.04	0.04	0.54	0.55	13.62	0.505	9.8e-05	24.53	17.86	13.62	0.59	2R_12395980_12396032_FBgn0050048_+	CGGGTGAGA	TTATTATATTTTTTCAATAGTTT	7.62	7.41	52
3L_10625336_10625394_FBgn0262592_-	CG43127	0.09	0.06	0.64	0.58	8.13	0.535	0.003907	0.09	0.06	0.68	0.65	8.87	0.59	0.00129	37.29	8.87	8.13	0.59	3L_10625336_10625394_FBgn0262592_-	CCAGTAAGT	AACCAATTTATGTACTCGAGATC	9.09	-1.99	58
3L_2244807_2244862_FBgn0052301_+	CG32301	0.17	0.1	0.82	0.63	5.37	0.59	0.028206	0.17	0.13	0.74	0.61	4.5	0.525	0.016369	46.43	5.37	4.5	0.59	3L_2244807_2244862_FBgn0052301_+	AAGGTGGGA	CTGGGTTTCCTCCGATGCAGAAC	6.03	6.94	55
3L_3902708_3902854_FBgn0003943_-	Ubi-p63E	0.41	0.4	0.97	1.02	2.46	0.59	0.001862	0.23	0.23	0.62	0.61	2.67	0.385	0.000169	27.21	2.67	2.46	0.59	3L_3902708_3902854_FBgn0003943_-	GTGGTGAGT	AACACTACGGTATTTTTTAGTGA	8.95	4.22	146
3R_5137495_5137613_FBgn0040684_-	CG12589	0.61	0.34	1.07	1.06	2.24	0.59	0.048635	0.27	0.31	0.58	0.66	2.14	0.33	0.017875	26.89	2.24	2.14	0.59	3R_5137495_5137613_FBgn0040684_-	ATAGTATGT	AATTTACCATTGCTGTGTAGCAC	4.41	3.62	118
2L_12008685_12008742_FBgn0014019_+	Rh5	0	0	0.5	0.67	NA	0.585	0.020466	0	0	0.42	0.65	NA	0.535	0.043231	39.66	0	0	0.585	2L_12008685_12008742_FBgn0014019_+	GACGTGAGT	CGAAATCCATTTTCTTTCAGTTC	9.22	6.71	57
2R_12496200_12498277_FBgn0050044_+	s-cup	0.47	0.39	1.11	0.92	2.36	0.585	0.029672	0.09	0.09	0.42	0.57	5.5	0.405	0.032625	39.03	5.5	2.36	0.585	2R_12496200_12498277_FBgn0050044_+	CGGGTAAGT	TTCGATTTAATTTGTTGCAGAGC	10.75	6.74	2077
2R_6981910_6981968_FBgn0050156_-	CG30156	0.03	0.02	0.59	0.62	24.2	0.58	0.000742	0.03	0.02	0.58	0.64	24.4	0.585	0.002692	52.54	24.4	24.2	0.585	2R_6981910_6981968_FBgn0050156_-	CAGGTGAGT	ACAGGCCCAATCTTCTCCAGAAC	10.67	6.29	58
3L_15473643_15473702_FBgn0036496_-	CG7804	0.38	0.35	0.7	0.75	1.99	0.36	0.006495	0.19	0.15	0.74	0.77	4.44	0.585	0.001821	40	4.44	1.99	0.585	3L_15473643_15473702_FBgn0036496_-	TTCGTGTGA	TTACTCTCTCCATACATAAGACA	-5.77	-0.34	59
3L_2662940_2662995_FBgn0053234_+	CG33234	0.02	0.03	0.63	0.59	24.4	0.585	0.00124	0.03	0.04	0.63	0.56	17	0.56	0.003962	42.86	24.4	17	0.585	3L_2662940_2662995_FBgn0053234_+	GAGGTTCTA	ATACTTCCTGTTTCTTGCAGTGC	-1.63	8.95	55
3L_6594836_6594898_FBgn0002926_-	ndl	0.25	0	0.75	0.67	5.68	0.585	0.046825	0	0	0.5	0.67	NA	0.585	0.020466	30.16	5.68	5.68	0.585	3L_6594836_6594898_FBgn0002926_-	GCAGTACGT	ACTTGATGTTTTTTTTATAGAGC	6.49	8.11	62
3R_23893290_23893350_FBgn0039124_-	tbrd-1	0.17	0.11	0.69	0.76	5.18	0.585	0.006152	0.15	0.09	0.58	0.59	4.88	0.465	0.004251	26.23	5.18	4.88	0.585	3R_23893290_23893350_FBgn0039124_-	AAAGTAAGC	AAAAAAAAAAACTGCTTTAGGCT	7.31	1.67	60
2L_11645546_11645600_FBgn0032369_-	CG6614	0	0.02	0.55	0.49	52	0.51	0.003823	0.01	0.03	0.61	0.59	30	0.58	0.000594	38.18	52	30	0.58	2L_11645546_11645600_FBgn0032369_-	CATGTGAGT	ATTGGCATACGCACCAACAGCTC	7.83	3.49	54
2L_2084226_2084277_FBgn0264864_+	CR44055	0.34	0.38	0.91	0.87	2.47	0.53	0.002836	0.49	0.64	1.18	1.11	2.03	0.58	0.019761	26.92	2.47	2.03	0.58	2L_2084226_2084277_FBgn0264864_+	GAAGTGAGA	ATATTGATTTGTATTTGCAGTGT	3.22	7.16	51
2R_22714384_22714448_FBgn0050268_+	CG30268	0.06	0.04	0.6	0.61	12.1	0.555	0.000406	0.12	0.13	0.61	0.8	5.64	0.58	0.025863	43.08	12.1	5.64	0.58	2R_22714384_22714448_FBgn0050268_+	CTGGTGAGT	CTTATCCATCCATCCATCAGCCG	10.1	3.57	64
2R_23058466_23058543_FBgn0265188_+	CG44253	0.14	0.14	0.65	0.73	4.93	0.55	0.005248	0.21	0.24	0.78	0.83	3.58	0.58	0.002517	37.18	4.93	3.58	0.58	2R_23058466_23058543_FBgn0265188_+	AAGGTAATC	CTATTGCACCACATAATTAGGTT	7.46	3.03	77
3R_13030155_13030221_FBgn0038111_-	--	0.06	0.04	0.62	0.64	12.6	0.58	0.000594	0.03	0.03	0.34	0.37	11.83	0.325	0.002123	40.3	12.6	11.83	0.58	3R_13030155_13030221_FBgn0038111_-	AGAGTAAGG	CAACTCTGGGTACTCCACAGTTC	5.42	4.48	66
3R_21876689_21876760_FBgn0038912_+	CG6656	0	0.05	0.63	0.58	24.2	0.58	0.003695	0	0	0.6	0.5	NA	0.55	0.008163	31.94	24.2	24.2	0.58	3R_21876689_21876760_FBgn0038912_+	ATCGTGAGT	CTATGATCTAACTCTATTAGCTG	8.88	2.98	71
X_17446840_17446909_FBgn0030840_-	p-cup	0.03	0.02	0.56	0.56	22.4	0.535	8.7e-05	0.05	0.02	0.61	0.62	17.57	0.58	0.000742	55.71	22.4	17.57	0.58	X_17446840_17446909_FBgn0030840_-	ACGGTGGGT	TTCTGCCCATTAACCCCCAGAGG	8.27	8.17	69
2L_18293946_18293998_FBgn0263090_-	CR43358	0.08	0.11	0.67	0.67	7.05	0.575	0.00068	0.08	0.1	0.67	0.5	6.5	0.495	0.028618	16.98	7.05	6.5	0.575	2L_18293946_18293998_FBgn0263090_-	GTTGTATGT	ATAATTCGTTTACCTTTCAGCCT	4.04	6.02	52
2R_25253762_25253819_FBgn0050428_+	CG30428	0.26	0.16	0.87	0.7	3.74	0.575	0.028177	0.26	0.27	0.73	0.6	2.51	0.4	0.025549	37.93	3.74	2.51	0.575	2R_25253762_25253819_FBgn0050428_+	CGGGTAGGT	CTTAGGAACGATTTTAACAGGTT	8.53	2.59	57
2R_6866942_6866996_FBgn0265935_-	coro	0.07	0.04	0.54	0.72	11.45	0.575	0.024267	0.03	0.02	0.09	0.12	4.2	0.08	0.036913	38.18	11.45	4.2	0.575	2R_6866942_6866996_FBgn0265935_-	CGCGTAAGA	TACGTCTCATTTCTTTTCAGAGC	6.41	9.87	54
2R_7972422_7972497_FBgn0027054_+	CSN4	0.47	0.46	0.92	0.97	2.03	0.48	0.002809	0.36	0.41	0.99	0.93	2.49	0.575	0.004581	28.95	2.49	2.03	0.575	2R_7972422_7972497_FBgn0027054_+	TAGGTAATA	CGAACATTTTCCAACACCAGCTA	6.84	3.04	75
2R_9827036_9827098_FBgn0033447_-	dila	0.08	0.06	0.56	0.73	9.21	0.575	0.021445	0.07	0.04	0.42	0.54	8.73	0.425	0.020527	50.79	9.21	8.73	0.575	2R_9827036_9827098_FBgn0033447_-	CAGGTAAGC	CTAAGAGTGGTCAACCGCAGATA	9.88	2.29	62
3R_26235607_26235655_FBgn0267730_+	CR46061	0.14	0.06	0.75	0.6	6.75	0.575	0.021161	0.17	0.12	0.6	0.67	4.38	0.49	0.007617	34.69	6.75	4.38	0.575	3R_26235607_26235655_FBgn0267730_+	GGGGTAAGT	ACGACTGATATTCCATATAGGCA	9.65	5.59	48
X_17202133_17202183_FBgn0030823_-	CG8918	0.19	0.24	0.72	0.86	3.67	0.575	0.016303	0.18	0.22	0.7	0.79	3.72	0.545	0.008066	41.18	3.72	3.67	0.575	X_17202133_17202183_FBgn0030823_-	TCAGTAAGT	CATCTAAGATCTCACCGCAGAGT	9.14	4.46	50
X_7936720_7936779_FBgn0260970_+	Ubr3	0.37	0.22	0.83	0.91	2.95	0.575	0.021161	0.32	0.21	0.76	0.82	2.98	0.525	0.013943	31.67	2.98	2.95	0.575	X_7936720_7936779_FBgn0260970_+	AAGGTAAAA	CATAAGAAAAAATCACGCAGTAA	8.38	-3.95	59
X_9558262_9558323_FBgn0261835_-	CR42767	0.02	0.01	0.58	0.6	39.33	0.575	0.000378	0.02	0.01	0.49	0.5	33	0.48	0.000217	41.94	39.33	33	0.575	X_9558262_9558323_FBgn0261835_-	AAAGTGAGT	GCGCGTACACATCGTTACAGCTA	8.4	3.63	61
2R_10355440_10355500_FBgn0033512_-	CG12902	0.01	0.01	0.1	0.09	9.5	0.085	0.003442	0.49	0.41	1.04	1	2.27	0.57	0.006099	40.98	9.5	2.27	0.57	2R_10355440_10355500_FBgn0033512_-	TAGGTGCGT	TTATGTCTTTGATCTAGTAGTCG	6.6	2.21	60
2R_10355440_10355500_FBgn0263271_-	CG43397	0.01	0.01	0.1	0.09	9.5	0.085	0.003442	0.49	0.41	1.04	1	2.27	0.57	0.006099	40.98	9.5	2.27	0.57	2R_10355440_10355500_FBgn0263271_-	TAGGTGCGT	TTATGTCTTTGATCTAGTAGTCG	6.6	2.21	60
2R_14373211_14373265_FBgn0050074_+	Obp50d	0.26	0.42	0.86	0.96	2.68	0.57	0.026317	0.19	0.23	0.68	0.66	3.19	0.46	0.002355	30.91	3.19	2.68	0.57	2R_14373211_14373265_FBgn0050074_+	ACTGTGGGT	TTATATTTTATACCATCTAGGCC	1.96	7.06	54
3R_15833284_15833390_FBgn0263023_-	CG43318	0.13	0.15	0.69	0.73	5.07	0.57	0.001535	0.15	0.18	0.61	0.62	3.73	0.45	0.001232	29.91	5.07	3.73	0.57	3R_15833284_15833390_FBgn0263023_-	ATGGTAAAA	AGCCCTAATTTCCCTTACAGATT	4.79	9.29	106
3R_22610953_22611009_FBgn0051156_-	CG31156	0.21	0.2	0.56	0.7	3.07	0.425	0.0262	0.16	0.26	0.73	0.83	3.71	0.57	0.015043	26.32	3.71	3.07	0.57	3R_22610953_22611009_FBgn0051156_-	CAAGTATGT	TAATATTCTCCACCATATAGGCA	7.44	5.83	56
3R_4413368_4413435_FBgn0052944_-	CG32944	0.1	0.07	0.73	0.58	7.71	0.57	0.017533	0.06	0.03	0.67	0.49	12.89	0.535	0.027875	51.47	12.89	7.71	0.57	3R_4413368_4413435_FBgn0052944_-	CGAGTGAGT	ACTCCCCATTCCATTCCTAGGTG	8.49	10.83	67
3R_5240579_5240639_FBgn0053293_-	CG33293	0.02	0.01	0.57	0.6	39	0.57	0.000769	0.03	0.02	0.48	0.49	19.4	0.46	0.000236	29.51	39	19.4	0.57	3R_5240579_5240639_FBgn0053293_-	AAGGTGCGT	GATAAACACGGTTTGTGCAGAGA	9.49	1.36	60
4_962348_962400_FBgn0264822_+	CR44030	0.38	0.36	1	0.88	2.54	0.57	0.011197	0.23	0.21	0.31	0.3	1.39	0.085	0.016865	24.53	2.54	1.39	0.57	4_962348_962400_FBgn0264822_+	CTTGTAAGT	TAGACTATTTTTATTTCCAGAAG	8	5.18	52
2L_10862735_10862803_FBgn0264351_-	CR43807	0.26	0.2	0.71	0.88	3.46	0.565	0.02452	0.24	0.13	0.65	0.75	3.78	0.515	0.020202	33.33	3.78	3.46	0.565	2L_10862735_10862803_FBgn0264351_-	GATGTAAGC	ATTTGTTGACATTTTTGCAGCTA	6.16	6.23	68
2L_12356593_12356645_FBgn0032424_+	CG17010	0.02	0.01	0.58	0.58	38.67	0.565	7.8e-05	0.02	0.01	0.5	0.5	33.33	0.485	0.000106	28.3	38.67	33.33	0.565	2L_12356593_12356645_FBgn0032424_+	AACGTAGGT	TTGTCAATTGATTACCTCAGATA	7.3	5.09	52
2L_19979044_19979105_FBgn0263611_+	CR43620	0.52	0.42	1.07	1	2.2	0.565	0.011469	0.47	0.44	0.82	0.97	1.97	0.44	0.028913	38.71	2.2	1.97	0.565	2L_19979044_19979105_FBgn0263611_+	GCGGTGAGA	TTTTTCTCTACGGCGCACAGTTT	7.4	3.38	61
2R_23284849_23284911_FBgn0034841_+	CG13541	0.08	0.05	0.63	0.63	9.69	0.565	0.000704	0.08	0.07	0.6	0.57	7.8	0.51	0.00096	34.92	9.69	7.8	0.565	2R_23284849_23284911_FBgn0034841_+	TAGGTACTG	GAGTCCTACTTTATTTCTAGTTG	5.9	5.19	62
3R_12892569_12892621_FBgn0038089_+	d-cup	0.16	0.14	0.59	0.73	4.4	0.51	0.018686	0.18	0.19	0.73	0.77	4.05	0.565	0.001329	43.4	4.4	4.05	0.565	3R_12892569_12892621_FBgn0038089_+	CTGGTGAGC	TCAATCTGTTGCCCAATTAGGAC	8.05	7.85	52
3R_16369945_16370002_FBgn0038423_-	CG10317	0.01	0.01	0.55	0.6	57.5	0.565	0.001952	0.01	0.01	0.53	0.56	54.5	0.535	0.000785	43.1	57.5	54.5	0.565	3R_16369945_16370002_FBgn0038423_-	AAAGTAATA	ACCAGTCAATCTAACTACAGTGA	0.92	3.02	57
3R_20815093_20815197_FBgn0038827_-	Fancd2	0.2	0.17	0.67	0.65	3.57	0.475	0.001437	0.29	0.17	0.88	0.71	3.46	0.565	0.032277	34.29	3.57	3.46	0.565	3R_20815093_20815197_FBgn0038827_-	TAAGTAAGT	ATAATTTAATTTCGTGGCAGCAT	8.07	4.33	104
X_10204492_10204556_FBgn0052690_+	CR32690	0.03	0.02	0.6	0.58	23.6	0.565	0.000391	0.03	0.03	0.47	0.46	15.5	0.435	0.000132	36.92	23.6	15.5	0.565	X_10204492_10204556_FBgn0052690_+	AAAGTGAGT	GCGCGTACACATCGTTACAGCTA	8.4	3.63	64
2L_14728458_14728516_FBgn0261571_-	CG42685	0.11	0.02	0.55	0.7	9.62	0.56	0.023536	0.09	0.05	0.49	0.69	8.43	0.52	0.036376	38.98	9.62	8.43	0.56	2L_14728458_14728516_FBgn0261571_-	CGTGTGAGT	GGGTTTAAACTTTATTTCAGTGC	7.42	5.69	58
2R_11861789_11861844_FBgn0085259_+	CG34230	0.23	0.19	0.61	0.56	2.79	0.375	0.00721	0.21	0.17	0.76	0.74	3.95	0.56	0.001591	39.29	3.95	2.79	0.56	2R_11861789_11861844_FBgn0085259_+	CCCGTAAGT	TTGGCCAAATCCTTTTCCAGTTC	9.09	6.01	55
2R_6189231_6189290_FBgn0262867_-	Ptr	0.18	0.3	0.9	0.7	3.33	0.56	0.040736	0.23	0.27	0.75	0.67	2.84	0.46	0.00932	38.33	3.33	2.84	0.56	2R_6189231_6189290_FBgn0262867_-	TGGGTAAGT	CTTCAATATGAACTTTACAGTTA	10.24	3.22	59
3L_5780750_5780818_FBgn0266384_-	CR45026	0.62	0.58	1.14	1.18	1.93	0.56	0.002541	0.52	0.48	0.61	0.65	1.26	0.13	0.044221	37.68	1.93	1.26	0.56	3L_5780750_5780818_FBgn0266384_-	AAAGTGAGC	ATTGACAACATGGATCGTAGTTC	5.89	-0.79	68
3R_30419485_30421277_FBgn0027544_-	CG2217	0.44	0.41	0.91	0.87	2.09	0.465	0.002878	0.07	0.03	0.55	0.67	12.2	0.56	0.012516	40.6	12.2	2.09	0.56	3R_30419485_30421277_FBgn0027544_-	GAGGTATTT	TTTCTTCGACATCAATACAGATA	7.63	4.87	1792
3R_30419485_30421277_FBgn0261704_-	CG42740	0.44	0.41	0.91	0.87	2.09	0.465	0.002878	0.07	0.03	0.55	0.67	12.2	0.56	0.012516	40.6	12.2	2.09	0.56	3R_30419485_30421277_FBgn0261704_-	GAGGTATTT	TTTCTTCGACATCAATACAGATA	7.63	4.87	1792
2L_16898388_16898440_FBgn0051805_-	CG31805	0.23	0.19	0.69	0.72	3.36	0.495	0.002541	0.28	0.21	0.78	0.82	3.27	0.555	0.005234	37.74	3.36	3.27	0.555	2L_16898388_16898440_FBgn0051805_-	GAGGTGAGT	ATACATTTCTATGCAATTAGAAC	10.03	2.84	52
2R_6981686_6981742_FBgn0050156_-	CG30156	0.09	0.07	0.5	0.6	6.88	0.47	0.011566	0.05	0.06	0.56	0.66	11.09	0.555	0.008098	38.6	11.09	6.88	0.555	2R_6981686_6981742_FBgn0050156_-	GGAGTGAGA	CAAATTACTTCTGATTCCAGGGG	0.49	5.06	56
3R_29998207_29998270_FBgn0039733_+	CG11504	0.18	0.27	0.83	0.73	3.47	0.555	0.014374	0.24	0.31	0.81	0.74	2.82	0.5	0.009658	51.56	3.47	2.82	0.555	3R_29998207_29998270_FBgn0039733_+	GAGGTAACT	CGCGATCCCTTCCCCGACAGAAA	8.77	7.8	63
3R_5814850_5814938_FBgn0261561_+	CG42675	0.12	0.11	0.65	0.69	5.83	0.555	0.001377	0.14	0.13	0.66	0.7	5.04	0.545	0.001428	51.69	5.83	5.04	0.555	3R_5814850_5814938_FBgn0261561_+	TTGGTTTGT	GTTTCCACTTCCACTTCCAGATC	1.94	10.4	88
2L_123073_123139_FBgn0266304_+	CR44969	0.7	0.59	1.22	1.17	1.85	0.55	0.011852	0.5	0.48	0.8	0.78	1.61	0.3	0.002215	28.36	1.85	1.61	0.55	2L_123073_123139_FBgn0266304_+	AAAGTACGT	GTAATATGCTTATCGCACAGTCT	7.99	4.18	66
2L_1344516_1344569_FBgn0026141_+	Cdlc2	0.08	0.07	0.62	0.63	8.33	0.55	0.000165	0.15	0.16	0.48	0.49	3.13	0.33	0.000459	38.89	8.33	3.13	0.55	2L_1344516_1344569_FBgn0026141_+	AAAGTGAGT	ATACACAGGTAGCCCCAAAGCCT	8.4	-8.66	53
3L_2252197_2252247_FBgn0052305_+	CG32305	0.33	0.27	0.86	0.84	2.83	0.55	0.003289	0.3	0.29	0.83	0.77	2.71	0.505	0.003607	43.14	2.83	2.71	0.55	3L_2252197_2252247_FBgn0052305_+	TAGGTGGGC	TCCATCCAATGATATCTAAGGCA	5.26	1.93	50
3R_10950820_10950873_FBgn0037857_+	Tengl4	0.02	0.01	0.58	0.55	37.67	0.55	0.000825	0.02	0.01	0.5	0.52	34	0.495	0.00051	33.33	37.67	34	0.55	3R_10950820_10950873_FBgn0037857_+	GCAGTGAGT	GTGACTTTGGATCATTTAAGATA	7.39	4.12	53
3R_13718049_13718111_FBgn0267383_-	Ubc87F	0.04	0.03	0.57	0.6	16.71	0.55	0.000825	0.04	0.04	0.49	0.52	12.62	0.465	0.001039	42.86	16.71	12.62	0.55	3R_13718049_13718111_FBgn0267383_-	CCAGTAAGT	TGGTGCTTATCCCCCCCAAGTCC	9.09	3.27	62
3R_25619982_25620045_FBgn0039347_+	CG5071	0.17	0.19	0.73	0.73	4.06	0.55	0.00033	0.16	0.18	0.69	0.73	4.18	0.54	0.00171	46.88	4.18	4.06	0.55	3R_25619982_25620045_FBgn0039347_+	TCGGTAAGC	CTTTCTGGACATGGAAATAGCAG	9.86	-0.69	63
3R_25619982_25620048_FBgn0039347_+	CG5071	0.17	0.19	0.73	0.73	4.06	0.55	0.00033	0.7	0.64	0.86	0.9	1.31	0.21	0.028236	47.76	4.06	1.31	0.55	3R_25619982_25620048_FBgn0039347_+	TCGGTAAGC	TCTGGACATGGAAATAGCAGGAG	9.86	-4.2	66
2L_5553333_5553385_FBgn0031720_-	CG14013	0.05	0.05	0.59	0.6	11.9	0.545	8.4e-05	0.05	0.05	0.57	0.56	11.3	0.515	9.4e-05	37.74	11.9	11.3	0.545	2L_5553333_5553385_FBgn0031720_-	TCGGTAGGC	TTCTATTAATTGCATAACAGACC	7.75	4.84	52
2L_8134513_8134577_FBgn0031990_-	PAPLA1	0.4	0.33	0.89	0.86	2.4	0.51	0.005529	0.29	0.27	0.78	0.87	2.95	0.545	0.007078	23.08	2.95	2.4	0.545	2L_8134513_8134577_FBgn0031990_-	CACGTACCG	TTAGATATGTTATTTGTTAGCCG	3.44	0.07	64
2R_15423444_15423500_FBgn0050472_-	CG30472	0.03	0.02	0.45	0.5	19	0.45	0.003195	0.03	0.02	0.57	0.57	22.8	0.545	8.4e-05	31.58	22.8	19	0.545	2R_15423444_15423500_FBgn0050472_-	TGAGTAAGT	AACAATATAACCTCTAACAGCTC	8.82	4.34	56
2L_15895702_15895754_FBgn0051735_+	CG31735	0.11	0.09	0.63	0.65	6.4	0.54	0.000685	0.11	0.1	0.62	0.62	5.9	0.515	9.4e-05	37.74	6.4	5.9	0.54	2L_15895702_15895754_FBgn0051735_+	ATAGTAAGT	AGGCAGTTCTTTATCACAAGCTT	8.65	-1.07	52
2R_6879806_6879863_FBgn0033112_-	Spn42Db	0.2	0.21	0.81	0.68	3.63	0.54	0.014264	0.21	0.22	0.68	0.81	3.47	0.53	0.014795	36.21	3.63	3.47	0.54	2R_6879806_6879863_FBgn0033112_-	CTGGTTAGC	CGCAACCTGGCTACTCACAGATG	2.22	4.73	57
2R_9084602_9084661_FBgn0033371_+	CNT1	0.01	0.01	0.47	0.55	51	0.5	0.006339	0.03	0.02	0.51	0.62	22.6	0.54	0.010298	31.67	51	22.6	0.54	2R_9084602_9084661_FBgn0033371_+	CAGGTAAAC	TCGCACAACATCTTAATTAGGGA	7.82	2.34	59
3R_27260416_27260466_FBgn0264841_+	CR44049	0.36	0.28	0.82	0.79	2.52	0.485	0.007669	0.36	0.32	0.9	0.86	2.59	0.54	0.002732	52.94	2.59	2.52	0.54	3R_27260416_27260466_FBgn0264841_+	CAGGTGAGC	TCTGATAGATCATGTCAAAGTTG	9.6	-3.41	50
X_17068305_17068370_FBgn0262487_-	CG43077	0.02	0	0.55	0.55	55	0.54	0.000343	0.02	0	0.45	0.51	48	0.47	0.004496	37.88	55	48	0.54	X_17068305_17068370_FBgn0262487_-	AAAGTGAGT	ACTATTCAATTATAATGTAGCGA	8.4	3.89	65
X_4803619_4803689_FBgn0029728_-	CG2861	0.02	0.05	0.46	0.69	16.43	0.54	0.043161	0.01	0.01	0.1	0.1	10	0.09	0	33.8	16.43	10	0.54	X_4803619_4803689_FBgn0029728_-	CCGGTGGGT	TATTGACTACTTAATGACAGGAT	7.85	3.13	70
2R_16015506_16015559_FBgn0034065_+	Rrp42	0.18	0.09	0.65	0.69	4.96	0.535	0.008366	0.17	0.09	0.67	0.65	5.08	0.53	0.005998	40.74	5.08	4.96	0.535	2R_16015506_16015559_FBgn0034065_+	CTGGTTAGA	GCTAATCCCTGTTCTCGCAGATT	3.13	7.73	53
3L_10641982_10642048_FBgn0036093_+	CG14154	0.57	0.53	1.1	1.07	1.97	0.535	0.002176	0.43	0.38	0.73	0.72	1.79	0.32	0.006288	34.33	1.97	1.79	0.535	3L_10641982_10642048_FBgn0036093_+	AGGGTAAAT	TTGATTCGCACCGCTCGCAGAAA	5.83	6.4	66
3L_19954328_19954389_FBgn0261506_-	CG42654	0.06	0.01	0.55	0.59	16.29	0.535	0.003562	0.06	0.02	0.51	0.52	12.88	0.475	0.001878	19.35	16.29	12.88	0.535	3L_19954328_19954389_FBgn0261506_-	ATAGTAAAT	TAAATTTAATGTTTTGATAGGAA	0.5	4.98	61
3L_5932318_5932524_FBgn0002638_-	Rcc1	0.28	0.32	0.81	0.86	2.78	0.535	0.003562	0.12	0.11	0.21	0.19	1.74	0.085	0.016865	48.31	2.78	1.74	0.535	3L_5932318_5932524_FBgn0002638_-	CAGGTAGGT	CACAAACGCACTATTTCCAGTTT	10.28	3.9	206
3L_5932465_5932524_FBgn0002638_-	Rcc1	0.28	0.32	0.81	0.86	2.78	0.535	0.003562	0.28	0.33	0.79	0.82	2.64	0.5	0.003383	53.33	2.78	2.64	0.535	3L_5932465_5932524_FBgn0002638_-	CAGGTAGGT	TCGCCTCCAAACCGCCGTAGCAA	10.28	2.18	59
3R_20559837_20559897_FBgn0040575_-	CG15922	0.07	0.05	0.5	0.54	8.67	0.46	0.002355	0.07	0.05	0.55	0.64	9.92	0.535	0.007343	44.26	9.92	8.67	0.535	3R_20559837_20559897_FBgn0040575_-	ACGGTATGT	CAGCTCCTCTTTTTGTCCAGTTT	9.94	5.28	60
3R_27369681_27369790_FBgn0263453_-	CR43476	0.03	0.07	0.5	0.47	9.7	0.435	0.003287	0.15	0.11	0.62	0.71	5.12	0.535	0.008366	24.55	9.7	5.12	0.535	3R_27369681_27369790_FBgn0263453_-	CTGGTATGT	TTCAACTTTTGTCTTGTTAGCAC	8.14	5.52	109
3R_5512228_5512294_FBgn0010399_-	Nmdar1	0	0	0.33	0.5	NA	0.415	0.039483	0	0.1	0.5	0.67	11.7	0.535	0.032338	53.73	11.7	11.7	0.535	3R_5512228_5512294_FBgn0010399_-	CGAGTAAGC	TAATCCGGACTTCCATTTAGCAT	6.91	3.5	66
2L_15292679_15292735_FBgn0011239_+	ms(2)35Ci	0.02	0.01	0.54	0.55	36.33	0.53	0.000178	0.02	0.01	0.46	0.52	32.67	0.475	0.004075	31.58	36.33	32.67	0.53	2L_15292679_15292735_FBgn0011239_+	CACGTATGT	GAAATTCCTTCTGAACTCAGAAT	7.26	3.74	56
2L_20060725_20060828_FBgn0014127_-	barr	0.19	0.19	0.78	0.66	3.79	0.53	0.012575	0.23	0.22	0.65	0.65	2.89	0.425	0.000138	42.31	3.79	2.89	0.53	2L_20060725_20060828_FBgn0014127_-	AAAGTGAGT	TTTATCCACTTCCTTGAAAGGAT	8.4	6.61	103
2R_19662597_19662649_FBgn0034464_+	CG11018	0.02	0.02	0.54	0.56	27.5	0.53	0.000356	0.01	0.01	0.46	0.48	47	0.46	0.000472	45.28	47	27.5	0.53	2R_19662597_19662649_FBgn0034464_+	ATCGTGAGT	TGTATATTATAATCCATTAGATT	8.88	4.01	52
2R_23599821_23599879_FBgn0260761_-	CG42559	0.32	0.29	0.81	0.77	2.59	0.485	0.002646	0.31	0.28	0.84	0.81	2.8	0.53	0.001598	45.76	2.8	2.59	0.53	2R_23599821_23599879_FBgn0260761_-	CAAGTGAGT	AGATGCATCTCTGTATCCAGGAA	9.1	6.28	58
2R_23599821_23599879_FBgn0260762_-	CG42560	0.32	0.29	0.81	0.77	2.59	0.485	0.002646	0.31	0.28	0.84	0.81	2.8	0.53	0.001598	45.76	2.8	2.59	0.53	2R_23599821_23599879_FBgn0260762_-	CAAGTGAGT	AGATGCATCTCTGTATCCAGGAA	9.1	6.28	58
2R_7503029_7503171_FBgn0261397_+	didum	0.01	0.01	0.09	0.06	7.5	0.065	0.049346	0.3	0.25	0.83	0.78	2.93	0.53	0.00442	44.06	7.5	2.93	0.53	2R_7503029_7503171_FBgn0261397_+	CAGGTTTGT	TCCCTCGGATTGCCCAACAGCAA	7.44	6.61	142
3R_22704488_22704542_FBgn0039009_-	CG13842	0.24	0.25	0.73	0.82	3.16	0.53	0.007219	0.23	0.19	0.63	0.76	3.31	0.485	0.019101	36.36	3.31	3.16	0.53	3R_22704488_22704542_FBgn0039009_-	CGCGTAAGT	TTTTTCTGGTCTCCTTGTAGAGG	9.93	10	54
3R_27369685_27369790_FBgn0263453_-	CR43476	0.03	0.07	0.5	0.47	9.7	0.435	0.003287	0.15	0.11	0.62	0.7	5.08	0.53	0.007045	24.53	9.7	5.08	0.53	3R_27369685_27369790_FBgn0263453_-	CTGGTATGT	GGATTTCAACTTTTGTCTTGTTA	8.14	-5.69	105
2L_15784170_15784230_FBgn0028901_+	CG18109	0.01	0	0.52	0.54	106	0.525	0.000453	0.02	0.01	0.5	0.49	33	0.48	0.000217	27.87	106	33	0.525	2L_15784170_15784230_FBgn0028901_+	ACGGTAAGA	ATGATAACGATGTTCCTTAGAGT	10.65	3.77	60
2L_20297166_20297223_FBgn0263333_-	CR43414	1.01	1	1.56	1.5	1.52	0.525	0.003339	0.64	0.62	0.83	0.8	1.29	0.185	0.009363	50	1.52	1.29	0.525	2L_20297166_20297223_FBgn0263333_-	AGAGTGAGA	GTGCGCACTTTCATTTTCAGCTG	2.37	9.58	57
3L_18913743_18913805_FBgn0036830_-	CG14077	0.03	0.02	0.54	0.54	21.6	0.515	9.4e-05	0.04	0.04	0.56	0.57	14.12	0.525	9.1e-05	31.75	21.6	14.12	0.525	3L_18913743_18913805_FBgn0036830_-	AAGGTTAAA	TGCATGTTACATCCCCACAGCGA	2.7	7.95	62
3R_13383345_13383463_FBgn0038145_+	Droj2	0.25	0.21	0.74	0.77	3.28	0.525	0.00226	0.09	0.08	0.17	0.19	2.12	0.095	0.013569	37.82	3.28	2.12	0.525	3R_13383345_13383463_FBgn0038145_+	TCGGTATTA	ACTACTTCGTCTGTTCACAGTAA	3.12	6.85	118
3R_21885333_21885394_FBgn0038915_-	CG17819	0.06	0.08	0.62	0.57	8.5	0.525	0.00262	0.14	0.21	0.64	0.63	3.63	0.46	0.005856	35.48	8.5	3.63	0.525	3R_21885333_21885394_FBgn0038915_-	GAAGTAAGG	TTAGCATAAACTATTTGCAGTCC	6.38	2.57	61
3R_30039407_30039476_FBgn0001280_-	janA	0.83	0.8	1.31	1.37	1.64	0.525	0.004057	0.17	0.15	0.45	0.45	2.81	0.29	0.001187	37.14	2.81	1.64	0.525	3R_30039407_30039476_FBgn0001280_-	CCGGTTGGT	CCTCCAACTGCTTTCCAAAGGAC	5.21	5.92	69
2R_13515352_13515416_FBgn0033848_+	CG13330	0.04	0.05	0.53	0.6	12.56	0.52	0.004591	0.1	0.13	0.5	0.58	4.7	0.425	0.009953	47.69	12.56	4.7	0.52	2R_13515352_13515416_FBgn0033848_+	CGAGTGAGT	AGGGCCTTCTTTTGTCCCAGATC	8.49	7.8	64
2R_17007059_17007132_FBgn0034179_+	CG6805	0.28	0.29	0.5	0.53	1.81	0.23	0.004693	0.42	0.36	0.89	0.93	2.33	0.52	0.004773	36.49	2.33	1.81	0.52	2R_17007059_17007132_FBgn0034179_+	AATGTTAGT	TGATTTCGCTTCTTTTGTAGTTA	-1.83	6.73	73
2R_17732276_17732344_FBgn0034266_+	CG4975	0	0	0.26	0.31	NA	0.285	0.007607	0.12	0	0.6	0.56	9.67	0.52	0.014473	52.17	9.67	9.67	0.52	2R_17732276_17732344_FBgn0034266_+	TGGGTAGGT	CGCTTGGTACTCCCTTTCAGACT	6.86	7.75	68
2R_17732276_17732344_FBgn0034267_+	CG4984	0	0	0.26	0.31	NA	0.285	0.007607	0.12	0	0.6	0.56	9.67	0.52	0.014473	52.17	9.67	9.67	0.52	2R_17732276_17732344_FBgn0034267_+	TGGGTAGGT	CGCTTGGTACTCCCTTTCAGACT	6.86	7.75	68
2R_19260068_19260121_FBgn0034423_+	tbrd-2	0.05	0.05	0.54	0.6	11.4	0.52	0.003312	0.05	0.04	0.44	0.5	10.44	0.425	0.005082	40.74	11.4	10.44	0.52	2R_19260068_19260121_FBgn0034423_+	ATGGTGAGT	ACAAATCATTCTATTGGCAGGCA	10.13	5.34	53
2R_21583612_21583678_FBgn0050222_+	CG30222	0.71	0.71	0.88	0.94	1.28	0.2	0.021768	0.06	0.06	0.53	0.63	9.67	0.52	0.009119	32.84	9.67	1.28	0.52	2R_21583612_21583678_FBgn0050222_+	AAAGTCAGT	ATTATTCTTATTTCTCTTAGAAA	1.98	6.41	66
2R_21583616_21583678_FBgn0050222_+	CG30222	0.09	0.08	0.41	0.47	5.18	0.355	0.00726	0.06	0.06	0.53	0.63	9.67	0.52	0.009119	31.75	9.67	5.18	0.52	2R_21583616_21583678_FBgn0050222_+	TCAGTAAGT	ATTATTCTTATTTCTCTTAGAAA	9.14	6.41	62
3R_20042877_20042934_FBgn0064119_+	CG33934	0.04	0.05	0.52	0.61	12.56	0.52	0.007496	0.07	0.08	0.45	0.52	6.47	0.41	0.007354	37.93	12.56	6.47	0.52	3R_20042877_20042934_FBgn0064119_+	ACGGTGGGT	CATTTATTGAATTCCCTAAGAAA	8.27	2.2	57
3R_20042877_20042934_FBgn0260466_+	Indy-2	0.04	0.05	0.52	0.61	12.56	0.52	0.007496	0.07	0.08	0.45	0.52	6.47	0.41	0.007354	37.93	12.56	6.47	0.52	3R_20042877_20042934_FBgn0260466_+	ACGGTGGGT	CATTTATTGAATTCCCTAAGAAA	8.27	2.2	57
2R_11356266_11356326_FBgn0033623_-	CG13202	0.03	0.06	0.43	0.44	9.67	0.39	0.00164	0.06	0.08	0.59	0.58	8.36	0.515	0.000471	32.79	9.67	8.36	0.515	2R_11356266_11356326_FBgn0033623_-	CAAGTAAGC	TGTAAGCCAATTGCCATCAGGAA	7.47	1.71	60
2R_9892048_9892101_FBgn0050007_+	--	0.04	0	0.42	0.65	26.75	0.515	0.047724	0.03	0.04	0.29	0.34	9	0.28	0.008189	25.93	26.75	9	0.515	2R_9892048_9892101_FBgn0050007_+	GTCGTAAGG	TAAATATTGTTTGATTTCAGGAG	5	7.47	53
3R_10950591_10950642_FBgn0037857_+	Tengl4	0.02	0.02	0.49	0.53	25.5	0.49	0.001662	0.03	0.04	0.55	0.55	15.71	0.515	9.4e-05	19.23	25.5	15.71	0.515	3R_10950591_10950642_FBgn0037857_+	GCAGTATGT	TAAAAGCGTATATATTTTAGTTG	5.57	2.77	51
3R_9573596_9573802_FBgn0037715_-	CG9399	0.45	0.61	1.07	1.02	1.97	0.515	0.025479	0.38	0.38	0.55	0.65	1.58	0.22	0.047967	40.58	1.97	1.58	0.515	3R_9573596_9573802_FBgn0037715_-	CAAGTACGA	TTTTATTTTGTGATTGCCAGCCA	5.39	5.17	206
3R_9669478_9669540_FBgn0037726_-	CG9492	0.14	0.05	0.67	0.55	6.42	0.515	0.020557	0.14	0.05	0.62	0.45	5.63	0.44	0.044606	50.79	6.42	5.63	0.515	3R_9669478_9669540_FBgn0037726_-	CCGGTGCGT	TCTTGTCTTACCAACCGCAGCAA	9.74	5.89	62
2L_16549647_16549702_FBgn0032588_-	CG5968	0.02	0.01	0.52	0.53	35	0.51	0.000192	0.02	0.02	0.44	0.44	22	0.42	0	25	35	22	0.51	2L_16549647_16549702_FBgn0032588_-	ACGGTGAGA	AAAAAAGGTAAATTCAAAAGGTC	8.94	-1.4	55
2L_5070300_5070352_FBgn0028572_+	qtc	0.46	0.45	0.8	0.76	1.71	0.325	0.004	0.51	0.5	1.02	1.01	2.01	0.51	0.000192	41.51	2.01	1.71	0.51	2L_5070300_5070352_FBgn0028572_+	AAAGTGAGG	TACTTATTATTAACACTTAGATT	4.44	4.53	52
2R_16078644_16078714_FBgn0263334_-	CR43415	0.61	0.69	1.07	1.16	1.72	0.465	0.016355	0.77	0.87	1.36	1.3	1.62	0.51	0.012821	40.85	1.72	1.62	0.51	2R_16078644_16078714_FBgn0263334_-	AAGGTAACA	GTATGTGTCCACATGTCCAGTTC	8.92	4.45	70
2R_22885812_22885915_FBgn0034792_-	YME1L	0.03	0.04	0.48	0.47	13.57	0.44	0.000258	0.06	0.05	0.56	0.57	10.27	0.51	0.000192	50.96	13.57	10.27	0.51	2R_22885812_22885915_FBgn0034792_-	GTGGTAAGT	CGTGTGATGTGATGTGACAGCCC	10.36	4.27	103
2R_23284845_23284911_FBgn0034841_+	CG13541	0.49	0.45	0.78	0.78	1.66	0.31	0.004137	0.08	0.07	0.6	0.57	7.8	0.51	0.00096	35.82	7.8	1.66	0.51	2R_23284845_23284911_FBgn0034841_+	ATTGTAGGT	GAGTCCTACTTTATTTCTAGTTG	3.34	5.19	66
3L_22548753_22548805_FBgn0037169_+	CG11404	0.02	0.02	0.51	0.55	26.5	0.51	0.001534	0.03	0.03	0.46	0.51	16.17	0.455	0.003005	43.4	26.5	16.17	0.51	3L_22548753_22548805_FBgn0037169_+	CAGGTAAAA	TGTACCGAATTCACAACCAGATC	8.59	4.54	52
3R_19899328_19899613_FBgn0038745_-	CG4538	0.12	0.12	0.55	0.57	4.67	0.44	0.000516	0.08	0.06	0.56	0.6	8.29	0.51	0.001917	36.71	8.29	4.67	0.51	3R_19899328_19899613_FBgn0038745_-	AAAGTACGA	CTAACATGTATATTTTTTAGTCT	4.65	6.66	285
3R_27235985_27236059_FBgn0051068_+	CG31068	0.07	0.11	0.58	0.62	6.67	0.51	0.003062	0.11	0.12	0.56	0.56	4.87	0.445	0.000126	38.67	6.67	4.87	0.51	3R_27235985_27236059_FBgn0051068_+	TAGGTAAGT	TGATGCTGCCATCTTAAAAGCAA	9.66	3.47	74
3R_29027029_29027087_FBgn0039622_-	eIF4E6	0.67	0.74	1.03	0.96	1.41	0.29	0.027918	0.1	0.23	0.69	0.66	4.09	0.51	0.016682	25.42	4.09	1.41	0.51	3R_29027029_29027087_FBgn0039622_-	TCGGTAAAT	CTACGAATGCATTTTAAAAGGGG	6.8	1.96	58
3R_6630599_6630653_FBgn0037462_+	sunz	0.08	0.08	0.63	0.55	7.38	0.51	0.006095	0.07	0.05	0.56	0.44	8.33	0.44	0.018581	45.45	8.33	7.38	0.51	3R_6630599_6630653_FBgn0037462_+	GAGGTGGTT	AATTTCCCCATGGACTACAGGTT	0.77	3.26	54
3R_7391790_7391840_FBgn0261502_+	CG42650	0.02	0.05	0.46	0.53	14.14	0.46	0.006783	0.02	0.05	0.5	0.59	15.57	0.51	0.00854	27.45	15.57	14.14	0.51	3R_7391790_7391840_FBgn0261502_+	CATGTAAGA	AACAGAGTTTAAAACTCCAGGGA	5.58	0.74	50
2L_10579922_10579996_FBgn0250826_+	CG34160	0.01	0.01	0.5	0.53	51.5	0.505	0.000881	0.02	0.02	0.44	0.45	22.25	0.425	0.000138	33.33	51.5	22.25	0.505	2L_10579922_10579996_FBgn0250826_+	GGCGTAAGT	GTATATTTTTTCTTATGAAGATC	9.39	5.43	74
2L_8041699_8041758_FBgn0031979_+	CCDC53	0.18	0.19	0.62	0.63	3.38	0.44	0.000258	0.18	0.2	0.79	0.6	3.66	0.505	0.033968	45	3.66	3.38	0.505	2L_8041699_8041758_FBgn0031979_+	AGAGTAAGT	CAAGCTCATTTCCATTGCAGCAC	9.35	7.07	59
2R_12395975_12396032_FBgn0050048_+	CG30048	0.7	0.71	0.99	1.02	1.43	0.3	0.002766	0.04	0.04	0.54	0.55	13.62	0.505	9.8e-05	29.31	13.62	1.43	0.505	2R_12395975_12396032_FBgn0050048_+	ATCGTCGGG	TTATTATATTTTTTCAATAGTTT	-10.45	7.41	57
2R_13198160_13198212_FBgn0053182_-	Kdm4B	0.28	0.31	0.69	0.91	2.71	0.505	0.045085	0.29	0.27	0.67	0.73	2.5	0.42	0.005621	35.85	2.71	2.5	0.505	2R_13198160_13198212_FBgn0053182_-	TCGGTAAAT	TGACAAACTATTCCGTTTAGTGT	6.8	3.71	52
2R_16244083_16244148_FBgn0261612_-	CngA	0	0	0.44	0.57	NA	0.505	0.016166	0	0	0.44	0.57	NA	0.505	0.016166	40.91	0	0	0.505	2R_16244083_16244148_FBgn0261612_-	GAAGTGAGT	CCTTAAACCATCCATTACAGTGG	7.97	4.04	65
2R_17483741_17483821_FBgn0262570_-	CG43110	0.06	0.12	0.59	0.6	6.61	0.505	0.003607	0.08	0.13	0.56	0.57	5.38	0.46	0.003058	25.93	6.61	5.38	0.505	2R_17483741_17483821_FBgn0262570_-	AAGGTTCGT	TGAGCAAATACTCTTTCCAGATT	8.44	4.46	80
2R_22708977_22709030_FBgn0050275_+	CG30275	0.02	0.03	0.5	0.53	20.6	0.49	0.00104	0.01	0.02	0.5	0.54	34.67	0.505	0.001662	48.15	34.67	20.6	0.505	2R_22708977_22709030_FBgn0050275_+	GTCGTAAGT	CCTTACCGACTGTCCTGCAGATC	9.9	9.28	53
2R_22710937_22710994_FBgn0050275_+	CG30275	0.01	0.02	0.47	0.56	34.33	0.5	0.0081	0.03	0.03	0.46	0.61	17.83	0.505	0.021353	43.1	34.33	17.83	0.505	2R_22710937_22710994_FBgn0050275_+	TAGGTAGGG	AGTGCTCTCAATATGCGTAGAGA	6.53	3.52	57
3L_20963621_20963689_FBgn0037040_-	CG12983	0.15	0.18	0.69	0.65	4.06	0.505	0.002442	0.16	0.17	0.68	0.65	4.03	0.5	0.000999	31.88	4.06	4.03	0.505	3L_20963621_20963689_FBgn0037040_-	GAAGTAGGG	TTTTGAAATTGTCCTTGCAGCCA	1.74	8.9	68
3R_6127413_6127468_FBgn0263498_-	CR43487	0.13	0.18	0.67	0.54	3.9	0.45	0.023123	0.06	0.08	0.6	0.55	8.21	0.505	0.002831	26.79	8.21	3.9	0.505	3R_6127413_6127468_FBgn0263498_-	TATGTAAAT	TTGGGAAACGTTCTTTTTAGAAG	-0.49	2.26	55
3R_6549145_6549205_FBgn0046873_+	Pif2	0.01	0	0.51	0.51	102	0.505	9.8e-05	0.01	0.01	0.41	0.43	42	0.41	0.000594	50.82	102	42	0.505	3R_6549145_6549205_FBgn0046873_+	AAGGTGAGT	ATCCGTACTCTAACTAACAGCAC	10.47	4.78	60
X_15756513_15756573_FBgn0030684_+	CG8260	0.21	0.15	0.7	0.67	3.81	0.505	0.004382	0.35	0.29	0.71	0.75	2.28	0.41	0.007645	37.7	3.81	2.28	0.505	X_15756513_15756573_FBgn0030684_+	TAAGTAAGC	AATGTTAGGACACGCGAAAGGCT	5.66	-9.66	60
2L_11647390_11647449_FBgn0032369_-	CG6614	0.04	0.06	0.57	0.53	11	0.5	0.001994	0.04	0.07	0.59	0.5	9.91	0.49	0.009241	45	11	9.91	0.5	2L_11647390_11647449_FBgn0032369_-	GAGGTGAGG	TTCCGCATTACCTTCCCCAGTGA	8.41	5.22	59
2L_9571415_9571476_FBgn0032130_+	CG3838	0.07	0.2	0.61	0.66	4.7	0.5	0.018853	0.19	0.19	0.48	0.51	2.61	0.305	0.00241	24.19	4.7	2.61	0.5	2L_9571415_9571476_FBgn0032130_+	CTGGTAATC	ATTTAAAACGTATCTTTTAGTGG	3.45	4.37	61
2R_13210700_13210749_FBgn0085341_-	CG34312	0.21	0.11	0.68	0.64	4.12	0.5	0.011402	0.02	0.01	0.1	0.09	6.33	0.08	0.007722	36	6.33	4.12	0.5	2R_13210700_13210749_FBgn0085341_-	AATGTATGT	CTTCTTATCGCGACCCACAGTTA	5.87	5.15	49
2R_8707861_8707919_FBgn0033324_-	CG14744	0.26	0.28	0.69	0.71	2.59	0.43	0.00108	0.08	0.09	0.52	0.65	6.88	0.5	0.016578	49.15	6.88	2.59	0.5	2R_8707861_8707919_FBgn0033324_-	ACTGTAGGT	TAAACCTCGCTGACCCTCAGCTG	4.15	3.55	58
3L_11691250_11691307_FBgn0036192_-	Pldn	0.02	0.02	0.57	0.47	26	0.5	0.009852	0.02	0.02	0.45	0.48	23.25	0.445	0.001134	31.03	26	23.25	0.5	3L_11691250_11691307_FBgn0036192_-	TAGGTAAAC	TGTAAAATTGGCATTCCTAGTGT	5.88	3.26	57
3L_18919949_18920003_FBgn0036832_-	CG18223	0.08	0.04	0.48	0.56	8.67	0.46	0.00932	0.08	0.03	0.5	0.61	10.09	0.5	0.014288	25.45	10.09	8.67	0.5	3L_18919949_18920003_FBgn0036832_-	TAGGTATAG	TCCTTTAATCAATGCAAAAGTAA	5.16	-3.22	54
3L_18919949_18920007_FBgn0036832_-	CG18223	0.35	0.31	0.59	0.67	1.91	0.3	0.021508	0.08	0.03	0.5	0.61	10.09	0.5	0.014288	27.12	10.09	1.91	0.5	3L_18919949_18920007_FBgn0036832_-	GGAGTAGGT	TCCTTTAATCAATGCAAAAGTAA	3.34	-3.22	58
3L_22283150_22283202_FBgn0025702_+	Srpk79D	0.3	0.32	0.66	0.7	2.19	0.37	0.003632	0.4	0.42	0.88	0.94	2.22	0.5	0.003976	28.3	2.22	2.19	0.5	3L_22283150_22283202_FBgn0025702_+	ACAGTAAAA	TACTCGTATTGTATTTCTAGGCT	-1.7	6.19	52
3R_5522712_5522763_FBgn0264427_-	CG43845	0.39	0.39	0.86	0.9	2.26	0.49	0.001662	0.41	0.39	0.88	0.92	2.25	0.5	0.001994	51.92	2.26	2.25	0.5	3R_5522712_5522763_FBgn0264427_-	GAAGTAAAG	CCGCAAGTGACCCCAAATAGTTT	0.82	-1.47	51
X_17282845_17282903_FBgn0030838_+	CG5445	0	0.01	0.54	0.47	101	0.5	0.004963	0	0.01	0.53	0.45	98	0.485	0.006838	33.9	101	98	0.5	X_17282845_17282903_FBgn0030838_+	TATGTATGC	ATTTGACATTATCTATGCAGCGT	1.3	6.03	58
2L_15264096_15264150_FBgn0045842_-	yuri	0.61	0.64	1.09	1.15	1.79	0.495	0.00456	0.52	0.55	0.82	0.85	1.56	0.3	0.004963	43.64	1.79	1.56	0.495	2L_15264096_15264150_FBgn0045842_-	GTGGTAATT	CCAAGCCGGTTTCGTCCTAGACG	5.8	4.48	54
2L_16898378_16898440_FBgn0051805_-	CG31805	0.23	0.19	0.69	0.72	3.36	0.495	0.002541	0.42	0.39	0.85	0.89	2.15	0.465	0.002878	38.1	3.36	2.15	0.495	2L_16898378_16898440_FBgn0051805_-	GAGGTGAGT	ATGCAATTAGAACTCCAAAGAAA	10.03	-6.39	62
2L_6805543_6805593_FBgn0031861_-	CG17375	0.05	0.02	0.51	0.55	15.14	0.495	0.002541	0.04	0.02	0.51	0.54	17.5	0.495	0.001324	25.49	17.5	15.14	0.495	2L_6805543_6805593_FBgn0031861_-	CATGTATGG	TAAAATTGAAATATATGTAGGTA	3.93	3.23	50
2L_6805543_6805597_FBgn0031861_-	CG17375	0.27	0.23	0.59	0.62	2.42	0.355	0.004923	0.04	0.02	0.51	0.54	17.5	0.495	0.001324	27.27	17.5	2.42	0.495	2L_6805543_6805597_FBgn0031861_-	AAAGCATGT	TAAAATTGAAATATATGTAGGTA	-0.82	3.23	54
2R_15939258_15939309_FBgn0034051_-	Mlf	0.06	0.04	0.54	0.55	10.9	0.495	0.00051	0.04	0.03	0.29	0.3	8.43	0.26	0.000739	40.38	10.9	8.43	0.495	2R_15939258_15939309_FBgn0034051_-	CCAGTAACT	TACTCATCTTTCGTTTGCAGCAA	1.17	9.35	51
2R_24123683_24123736_FBgn0264297_-	CG43775	0.28	0.27	0.68	0.67	2.45	0.4	0.000312	0.29	0.26	0.77	0.77	2.8	0.495	0.000917	55.56	2.8	2.45	0.495	2R_24123683_24123736_FBgn0264297_-	CAGGTGAGC	CTGATCCCTCGCTTCTACAGGGA	9.6	10.25	53
2R_24123683_24123736_FBgn0264298_-	CG43776	0.28	0.27	0.68	0.67	2.45	0.4	0.000312	0.29	0.26	0.77	0.77	2.8	0.495	0.000917	55.56	2.8	2.45	0.495	2R_24123683_24123736_FBgn0264298_-	CAGGTGAGC	CTGATCCCTCGCTTCTACAGGGA	9.6	10.25	53
2R_24123683_24123736_FBgn0264299_-	CG43777	0.28	0.27	0.68	0.67	2.45	0.4	0.000312	0.29	0.26	0.77	0.77	2.8	0.495	0.000917	55.56	2.8	2.45	0.495	2R_24123683_24123736_FBgn0264299_-	CAGGTGAGC	CTGATCCCTCGCTTCTACAGGGA	9.6	10.25	53
2R_8898153_8898220_FBgn0266729_-	CR45202	0.33	0.21	0.77	0.76	2.83	0.495	0.014474	0.68	0.65	0.92	0.91	1.38	0.25	0.003976	36.76	2.83	1.38	0.495	2R_8898153_8898220_FBgn0266729_-	AAAGTAAGT	GGATCATTGGTTGCGCCCAGGCA	9.72	3.01	67
3R_22611200_22611251_FBgn0051156_-	CG31156	0.28	0.21	0.71	0.72	2.92	0.47	0.005611	0.32	0.2	0.75	0.76	2.9	0.495	0.014474	28.85	2.92	2.9	0.495	3R_22611200_22611251_FBgn0051156_-	CAGGTTTGG	AACAAACATATTTTGTATAGTGT	5.63	2.5	51
2R_10940439_10940506_FBgn0033574_-	Spn47C	0.01	0.01	0.46	0.54	50	0.49	0.006598	0.01	0.01	0.43	0.51	47	0.46	0.007477	27.94	50	47	0.49	2R_10940439_10940506_FBgn0033574_-	CAGGTGAGG	ATATATTCAATTACTATCAGAGG	10.07	3.16	67
3L_10885791_10885901_FBgn0027615_-	CG6404	0.05	0.06	0.58	0.51	9.91	0.49	0.005166	0.02	0.03	0.48	0.41	17.8	0.42	0.007012	42.34	17.8	9.91	0.49	3L_10885791_10885901_FBgn0027615_-	CAGGTGAGT	ATGAAAACTCTGTTTGCCAGGCA	10.67	4.03	110
3L_19951797_19951853_FBgn0085287_-	CG34258	0.02	0.02	0.52	0.5	25.5	0.49	0.000416	0.03	0.02	0.5	0.49	19.8	0.47	0.000226	21.05	25.5	19.8	0.49	3L_19951797_19951853_FBgn0085287_-	CAGGTAAAT	ATTTCTATTTGGTTGCATAGCCG	8.76	4.35	56
3L_2653907_2653969_FBgn0259199_+	Snup	0	0.06	0.51	0.53	17.33	0.49	0.004139	0	0.06	0.47	0.5	16.17	0.455	0.00539	38.1	17.33	16.17	0.49	3L_2653907_2653969_FBgn0259199_+	CAAGTAGGT	TCTTTCTTAACTTGACCCAGAAC	7.33	4.76	62
3L_2653907_2653969_FBgn0259200_+	CG42304	0	0.06	0.51	0.53	17.33	0.49	0.004139	0	0.06	0.47	0.5	16.17	0.455	0.00539	38.1	17.33	16.17	0.49	3L_2653907_2653969_FBgn0259200_+	CAAGTAGGT	TCTTTCTTAACTTGACCCAGAAC	7.33	4.76	62
3L_4418717_4418781_FBgn0035542_+	DOR	0.32	0.49	0.93	0.86	2.21	0.49	0.033438	0.14	0.22	0.37	0.37	2.06	0.19	0.041577	29.23	2.21	2.06	0.49	3L_4418717_4418781_FBgn0035542_+	ATAGTAACT	ACGGTTTATTCCTCTTGCAGACG	0.3	9.91	64
3R_14262228_14262299_FBgn0038218_-	CG14841	0.07	0.09	0.55	0.59	7.13	0.49	0.002076	0.07	0.06	0.45	0.48	7.15	0.4	0.001559	41.67	7.15	7.13	0.49	3R_14262228_14262299_FBgn0038218_-	TCGGTGAGT	TCTCATCGCCATTGAACAAGGAT	11.11	1.34	71
X_15664276_15664344_FBgn0262991_-	CR43299	0.13	0.16	0.29	0.32	2.1	0.16	0.017128	0.2	0.22	0.8	0.6	3.33	0.49	0.039585	49.28	3.33	2.1	0.49	X_15664276_15664344_FBgn0262991_-	GACGTGAGT	TCCATCTCGCTCTTTAAAAGGAG	9.22	5.86	68
2L_21758143_21758201_FBgn0032961_+	CG1416	0.4	0.35	0.84	0.88	2.29	0.485	0.004329	0.34	0.32	0.65	0.69	2.03	0.34	0.004297	30.51	2.29	2.03	0.485	2L_21758143_21758201_FBgn0032961_+	AAAGTAAAC	AGTTTCATACAATTCTACAGTAA	1.69	2.46	58
2R_13249332_13249400_FBgn0033818_-	CG4712	0.02	0.02	0.46	0.55	25.25	0.485	0.008499	0.03	0.03	0.38	0.5	14.67	0.41	0.020752	28.99	25.25	14.67	0.485	2R_13249332_13249400_FBgn0033818_-	AAGGTATAG	ATAATAATCATCTCCATCAGAGC	7.98	4.79	68
2R_16011839_16011954_FBgn0034063_+	CG8389	0.05	0.09	0.57	0.54	7.93	0.485	0.002646	0.12	0.11	0.49	0.4	3.87	0.33	0.018309	39.66	7.93	3.87	0.485	2R_16011839_16011954_FBgn0034063_+	TGGGTAAAT	CGCTGTTTACATATTTTTAGCCA	4.69	5.29	115
2R_18298477_18298542_FBgn0034325_+	CG18539	0.03	0.02	0.33	0.5	16.6	0.39	0.044508	0	0.02	0.46	0.53	49.5	0.485	0.005586	25.76	49.5	16.6	0.485	2R_18298477_18298542_FBgn0034325_+	ATGGTTGAG	GGTTATTAATCGCTGGACAGGTG	-5.53	4.96	65
2R_22713381_22713439_FBgn0050268_+	CG30268	0.01	0	0.41	0.57	98	0.485	0.026244	0.01	0	0.39	0.4	79	0.39	0.000329	42.37	98	79	0.485	2R_22713381_22713439_FBgn0050268_+	GCTGTAAGT	TTTCATTACTTCATTACCAGACC	8.56	6.35	58
3L_16861042_16861153_FBgn0036670_+	CG13029	0.08	0.06	0.44	0.54	7	0.42	0.014421	0.08	0.09	0.56	0.58	6.71	0.485	0.000531	29.46	7	6.71	0.485	3L_16861042_16861153_FBgn0036670_+	CCGGTAAAG	GTATGTGACACTTAATACAGCCC	6.84	2.62	111
3R_12111034_12111087_FBgn0051361_+	dpr17	0.24	0.27	0.66	0.71	2.69	0.43	0.004566	0.27	0.31	0.75	0.8	2.67	0.485	0.004329	35.19	2.69	2.67	0.485	3R_12111034_12111087_FBgn0051361_+	TTTGTAAGC	AGGTTAGAGATTAATTAAAGGCG	3.93	-7.58	53
3R_22362947_22363006_FBgn0083967_+	Muted	0.12	0.07	0.61	0.55	6.11	0.485	0.006421	0.15	0.12	0.47	0.47	3.48	0.335	0.001999	40	6.11	3.48	0.485	3R_22362947_22363006_FBgn0083967_+	GAGGTGGAG	GGTGCTACCAACTCTTCCAGAGC	-0.52	4.67	59
3R_22362947_22363006_FBgn0260467_+	CG7071	0.12	0.07	0.61	0.55	6.11	0.485	0.006421	0.15	0.12	0.47	0.47	3.48	0.335	0.001999	40	6.11	3.48	0.485	3R_22362947_22363006_FBgn0260467_+	GAGGTGGAG	GGTGCTACCAACTCTTCCAGAGC	-0.52	4.67	59
3R_7771152_7771210_FBgn0037516_-	CG11286	0.05	0.03	0.49	0.49	12.25	0.45	0.000493	0.04	0.03	0.53	0.51	14.86	0.485	0.000531	33.9	14.86	12.25	0.485	3R_7771152_7771210_FBgn0037516_-	GAAGTAAGC	GACTTTCGTGGCTTTTCTAGAAT	6.95	8.04	58
2L_10908230_10908281_FBgn0032314_-	CG7309	0.01	0.01	0.45	0.53	49	0.48	0.006873	0.02	0.01	0.42	0.49	30.33	0.44	0.006395	34.62	49	30.33	0.48	2L_10908230_10908281_FBgn0032314_-	ATTGTATGT	TTTAGAATATCGTTCTGTAGTCT	4.34	3.21	51
2L_14277401_14277461_FBgn0052971_+	CG32971	0.21	0.2	0.65	0.72	3.34	0.48	0.005382	0.31	0.29	0.74	0.77	2.52	0.455	0.001566	21.31	3.34	2.52	0.48	2L_14277401_14277461_FBgn0052971_+	AAGGTTTCT	AAAGAAAATTTTTTAAGTAGAAG	0.28	-1.53	60
2L_16337465_16337527_FBgn0028899_-	CG31817	0.17	0.14	0.66	0.6	4.06	0.475	0.004949	0.16	0.13	0.62	0.63	4.31	0.48	0.001083	36.51	4.31	4.06	0.48	2L_16337465_16337527_FBgn0028899_-	GTGGTATAT	ACCTACTCTACTCTTTTCAGAGG	2.63	7.88	62
2L_2000352_2000413_FBgn0263441_+	CR43464	0.02	0.02	0.37	0.36	18.25	0.345	0.00021	0	0	0.55	0.41	NA	0.48	0.020612	37.1	18.25	18.25	0.48	2L_2000352_2000413_FBgn0263441_+	CTTGTGAGT	AGTACACTTTGCTTCTGTAGCTC	7.15	5.77	61
2L_2992948_2993013_FBgn0025681_+	CG3558	0.2	0.08	0.68	0.56	4.43	0.48	0.029857	0.27	0.22	0.4	0.39	1.61	0.15	0.027694	36.36	4.43	1.61	0.48	2L_2992948_2993013_FBgn0025681_+	CAGGTATAA	AACTTTCTATTTCCGTGCAGATA	7.46	9.09	65
2L_6770271_6770334_FBgn0031857_-	LUBEL	0	0	0.41	0.55	NA	0.48	0.020612	0.08	0.08	0.57	0.45	6.38	0.43	0.018919	31.25	6.38	6.38	0.48	2L_6770271_6770334_FBgn0031857_-	CAGGTGGGC	GAGATAATTATCACTTGCAGATA	8.07	6.35	63
2R_15204176_15204234_FBgn0033996_+	CG11807	0.13	0.15	0.52	0.67	4.25	0.455	0.026557	0.11	0.14	0.6	0.61	4.84	0.48	0.001083	27.12	4.84	4.25	0.48	2R_15204176_15204234_FBgn0033996_+	TAAGTATTG	ACAAATATTATTTTCCTAAGGTT	-4.09	5.37	58
2R_16768480_16768541_FBgn0034156_+	CG5348	0	0.02	0.39	0.59	49	0.48	0.04115	0.02	0.01	0.39	0.59	32.67	0.475	0.041674	38.71	49	32.67	0.48	2R_16768480_16768541_FBgn0034156_+	TGGGTGAGC	TCATCAATACTCCTTTTCAGGTG	7.23	8.91	61
3L_2653658_2653717_FBgn0259199_+	Snup	0.13	0.06	0.61	0.51	5.89	0.465	0.016795	0.07	0.04	0.55	0.52	9.73	0.48	0.001947	38.33	9.73	5.89	0.48	3L_2653658_2653717_FBgn0259199_+	CAGGTGGAG	AATATTTATTTAACCCGCAGAAA	2.57	8.31	59
3L_2653658_2653717_FBgn0259200_+	CG42304	0.13	0.06	0.61	0.51	5.89	0.465	0.016795	0.07	0.04	0.55	0.52	9.73	0.48	0.001947	38.33	9.73	5.89	0.48	3L_2653658_2653717_FBgn0259200_+	CAGGTGGAG	AATATTTATTTAACCCGCAGAAA	2.57	8.31	59
3L_4242889_4242947_FBgn0011692_+	pav	0.09	0.07	0.62	0.5	7	0.48	0.015682	0.14	0.11	0.42	0.37	3.16	0.27	0.01146	40.68	7	3.16	0.48	3L_4242889_4242947_FBgn0011692_+	AGTGTAAGT	ATGAGAATACCCATTTGCAGACC	8.46	4.17	58
3R_15746046_15746105_FBgn0038355_+	CG4520	0.18	0.14	0.54	0.55	3.41	0.385	0.002855	0.21	0.15	0.65	0.67	3.67	0.48	0.004312	25	3.67	3.41	0.48	3R_15746046_15746105_FBgn0038355_+	AAGGTTTTA	AATTTTAATTTTTTCTCCAGTCT	0.84	6.41	59
3R_19841070_19841127_FBgn0051459_+	CG31459	0.26	0.26	0.77	0.67	2.77	0.46	0.011609	0.26	0.24	0.74	0.72	2.92	0.48	0.000867	27.59	2.92	2.77	0.48	3R_19841070_19841127_FBgn0051459_+	AAAGTAATT	ATTTTGATTTCTCTTCATAGTCA	3.64	7.85	57
3R_24129317_24129371_FBgn0039153_-	GatB	0	0	0.44	0.52	NA	0.48	0.006873	0	0	0.46	0.42	NA	0.44	0.00206	32.73	0	0	0.48	3R_24129317_24129371_FBgn0039153_-	AAGGTGAGT	CCGAGTATTTTTTATTGTAGAGG	10.47	4.07	54
2L_13265717_13265781_FBgn0051848_-	CG31848	0.02	0.01	0.56	0.42	32.67	0.475	0.021139	0.02	0.01	0.42	0.35	25.67	0.37	0.009008	41.54	32.67	25.67	0.475	2L_13265717_13265781_FBgn0051848_-	ATGGTAAGT	CATAAAATCTCAACCCCAAGTAC	11.01	0.36	64
2L_14548586_14548650_FBgn0250844_-	CG4218	0.04	0.04	0.27	0.27	6.75	0.23	0	0.02	0.02	0.49	0.5	24.75	0.475	0.000111	32.31	24.75	6.75	0.475	2L_14548586_14548650_FBgn0250844_-	CAGGTGGGT	CTAAACTACTACGTTCATAGCAA	8.56	2.49	64
2L_9579448_9579510_FBgn0051709_-	CG31709	0.02	0.01	0.43	0.44	29	0.42	0.000283	0.03	0.02	0.5	0.5	20	0.475	0.000111	26.98	29	20	0.475	2L_9579448_9579510_FBgn0051709_-	ATTGTGAGT	CCAAATTTTGTATTGAGAAGCGT	7.35	-0.96	62
2R_22176758_22176814_FBgn0034704_+	CG6758	0.02	0	0.48	0.49	48.5	0.475	0.000554	0.02	0.01	0.42	0.42	28	0.405	0.000152	36.84	48.5	28	0.475	2R_22176758_22176814_FBgn0034704_+	GAGGTGAGT	TTTATTTCCTGTTTCAAAAGGAT	10.03	7.49	56
2R_22917299_22917350_FBgn0050187_-	CG30187	0	0	0.44	0.33	NA	0.385	0.019804	0	0	0.57	0.38	NA	0.475	0.03775	34.62	0	0	0.475	2R_22917299_22917350_FBgn0050187_-	CAGGTAACT	ACTAAACTCTGGCTTTGCAGACG	8.63	6.64	51
3R_12111034_12111103_FBgn0051361_+	dpr17	0.24	0.27	0.66	0.71	2.69	0.43	0.004566	0.33	0.35	0.78	0.85	2.4	0.475	0.005821	38.57	2.69	2.4	0.475	3R_12111034_12111103_FBgn0051361_+	TTTGTAAGC	AAAGGCGGCCTTGTAAATAGCGG	3.93	1.31	69
3R_16203594_16203647_FBgn0051287_+	CG31287	0.02	0.03	0.51	0.49	20	0.475	0.000554	0.03	0.03	0.48	0.47	15.83	0.445	0.000126	38.89	20	15.83	0.475	3R_16203594_16203647_FBgn0051287_+	AATGTGAGA	AATTTTTCATACTCCAACAGGCA	3.37	7.43	53
2L_12165593_12165792_FBgn0051860_+	ZnT33D	0.26	0.25	0.72	0.73	2.84	0.47	0.000226	0.24	0.2	0.7	0.68	3.14	0.47	0.002256	30.5	3.14	2.84	0.47	2L_12165593_12165792_FBgn0051860_+	ACGGTAATT	AAACTAGAATTCCATACCAGGCA	7.31	0.63	199
2L_13382788_13382895_FBgn0032515_+	loqs	0.11	0.1	0.56	0.59	5.48	0.47	0.00113	0.08	0.09	0.46	0.48	5.53	0.385	0.000842	44.44	5.53	5.48	0.47	2L_13382788_13382895_FBgn0032515_+	AACGTGAGT	TACCCCGAAATTTTAAACAGATA	9.54	5.31	107
2R_14356951_14357135_FBgn0033925_-	CG8617	0.05	0.08	0.51	0.56	8.23	0.47	0.003826	0.09	0.07	0.53	0.51	6.5	0.44	0.001031	55.14	8.23	6.5	0.47	2R_14356951_14357135_FBgn0033925_-	CAGGTAAGT	CCACGCACACACATGCACAGGCC	10.86	2.4	184
3L_20963393_20963448_FBgn0037040_-	CG12983	0.57	0.47	0.89	0.93	1.75	0.39	0.018538	0.65	0.57	1.08	1.08	1.77	0.47	0.007165	37.5	1.77	1.75	0.47	3L_20963393_20963448_FBgn0037040_-	AAGGTTAAA	GTTTGTACGTCCCATTACAGCGC	2.7	7.14	55
2L_12841680_12841742_FBgn0266306_+	CR44971	0	0	0.46	0.4	NA	0.43	0.004832	0	0	0.47	0.46	NA	0.465	0.000116	46.03	0	0	0.465	2L_12841680_12841742_FBgn0266306_+	CCAGTTAAG	AACTTCCCCAACTCTCGCAGATG	-12.23	6.88	62
2L_21173843_21173898_FBgn0051627_+	CG31627	0.06	0.05	0.46	0.51	8.82	0.43	0.003497	0.06	0.04	0.49	0.54	10.3	0.465	0.003336	25	10.3	8.82	0.465	2L_21173843_21173898_FBgn0051627_+	ATTGTATGT	TTATTCTACTTTTTACTCAGCCA	4.34	4.7	55
2L_6663375_6663435_FBgn0031844_-	CG13771	0.11	0.11	0.48	0.67	5.23	0.465	0.039295	0.17	0.14	0.5	0.63	3.65	0.41	0.025465	49.18	5.23	3.65	0.465	2L_6663375_6663435_FBgn0031844_-	ATGGTAACC	ACTCCCAATACCAAGCACAGTGG	5.31	-4.31	60
2R_10354037_10354105_FBgn0250840_+	--	0.57	0.54	0.86	0.87	1.56	0.31	0.002591	0.59	0.56	1.04	1.04	1.81	0.465	0.001039	43.48	1.81	1.56	0.465	2R_10354037_10354105_FBgn0250840_+	TTGGTCAGT	GTCCACCCTTATAATTCCAGATC	5.07	6.74	68
2R_11651225_11651323_FBgn0033639_-	CG9003	0.47	0.45	0.94	0.82	1.91	0.42	0.020337	0.52	0.46	0.9	1.01	1.95	0.465	0.017673	29.29	1.95	1.91	0.465	2R_11651225_11651323_FBgn0033639_-	GATGTAGGC	ATAACAACAACTACTGACAGAAC	2.52	1.01	98
2R_13208194_13208252_FBgn0033806_+	FLASH	0.07	0.02	0.38	0.51	9.89	0.4	0.029	0.08	0.03	0.49	0.55	9.45	0.465	0.006979	37.29	9.89	9.45	0.465	2R_13208194_13208252_FBgn0033806_+	CAGGTCAGT	GCACCATCTGATTTTTGTAGCAA	8.94	4.98	58
3R_8677048_8677112_FBgn0037610_+	CG8043	0.01	0.01	0.48	0.47	47.5	0.465	0.000116	0.09	0.08	0.44	0.45	5.24	0.36	0.000386	47.69	47.5	5.24	0.465	3R_8677048_8677112_FBgn0037610_+	AAGGTAAGA	CAGATGCCTCCATTTTGCAGCAT	10.57	6.7	64
X_19612876_19612964_FBgn0031038_+	Tyler	0.53	0.52	0.87	0.85	1.64	0.335	0.001112	0.16	0.11	0.62	0.58	4.44	0.465	0.004707	55.06	4.44	1.64	0.465	X_19612876_19612964_FBgn0031038_+	GCGGTGGGT	CTGGAAACGTCATCCCGCAGGTG	6.6	5.85	88
X_19612876_19612964_FBgn0031039_+	Shawn	0.53	0.52	0.87	0.85	1.64	0.335	0.001112	0.16	0.11	0.62	0.58	4.44	0.465	0.004707	55.06	4.44	1.64	0.465	X_19612876_19612964_FBgn0031039_+	GCGGTGGGT	CTGGAAACGTCATCCCGCAGGTG	6.6	5.85	88
X_19612886_19612964_FBgn0031038_+	Tyler	0.16	0.12	0.59	0.56	4.11	0.435	0.003287	0.16	0.11	0.62	0.58	4.44	0.465	0.004707	53.16	4.44	4.11	0.465	X_19612886_19612964_FBgn0031038_+	AGGGTGAGC	CTGGAAACGTCATCCCGCAGGTG	7.75	5.85	78
X_19612886_19612964_FBgn0031039_+	Shawn	0.16	0.12	0.59	0.56	4.11	0.435	0.003287	0.16	0.11	0.62	0.58	4.44	0.465	0.004707	53.16	4.44	4.11	0.465	X_19612886_19612964_FBgn0031039_+	AGGGTGAGC	CTGGAAACGTCATCCCGCAGGTG	7.75	5.85	78
2L_21142013_21142238_FBgn0023388_-	Dap160	0.35	0.32	0.71	0.88	2.37	0.46	0.033451	0.42	0.44	0.68	0.79	1.71	0.305	0.03199	38.5	2.37	1.71	0.46	2L_21142013_21142238_FBgn0023388_-	AAAGTAAGC	TTTTTGGAAATGCTTTATAGGTA	7.31	5.33	225
2L_6770534_6770590_FBgn0031857_-	LUBEL	0	0	0.36	0.56	NA	0.46	0.044153	0	0	0.33	0.5	NA	0.415	0.039483	38.6	0	0	0.46	2L_6770534_6770590_FBgn0031857_-	GTGGTAAGC	GCACTAATTACCCATTTCAGATG	8.15	6.59	56
2R_11968480_11968546_FBgn0033669_-	PI31	0.61	0.56	1.03	1.06	1.79	0.46	0.003993	0.41	0.39	0.53	0.52	1.31	0.125	0.007905	32.84	1.79	1.31	0.46	2R_11968480_11968546_FBgn0033669_-	AATGTAAAC	TTCTGTTTACTCCCACCCAGATT	-0.1	6.49	66
3L_248622_248675_FBgn0052476_+	mthl14	0.04	0	0.35	0.38	18.25	0.345	0.00521	0.02	0.02	0.44	0.52	24	0.46	0.007477	27.78	24	18.25	0.46	3L_248622_248675_FBgn0052476_+	CAGGTATGA	AAATTCTTCTGCAAAATTAGTTC	9.46	0.43	53
3L_9417037_9417095_FBgn0035988_-	CG3982	0.02	0.02	0.47	0.49	24	0.46	0.000472	0.02	0.01	0.41	0.44	28.33	0.41	0.001484	40.68	28.33	24	0.46	3L_9417037_9417095_FBgn0035988_-	GCTGTAAGT	CTGAATAACTTGGTTTACAGTCA	8.56	3.63	58
X_15797372_15797436_FBgn0052581_-	CG32581	0.17	0.09	0.58	0.6	4.54	0.46	0.007938	0.13	0.1	0.55	0.52	4.65	0.42	0.002541	33.85	4.65	4.54	0.46	X_15797372_15797436_FBgn0052581_-	CTGGTAGGT	ACATTTGCCCATGTATTTAGCTG	8.37	5.7	64
X_7511929_7511992_FBgn0052719_-	CG32719	0.41	0.49	0.93	0.89	2.02	0.46	0.00932	0.22	0.26	0.46	0.48	1.96	0.23	0.00932	31.25	2.02	1.96	0.46	X_7511929_7511992_FBgn0052719_-	CCAGTGAGT	AGATCTTCTCGTCCCTGTAGAAA	8.28	9.36	63
2R_15227339_15227405_FBgn0265508_+	CR44370	0.16	0.17	0.41	0.51	2.79	0.295	0.02781	0.25	0.28	0.67	0.77	2.72	0.455	0.012908	29.85	2.79	2.72	0.455	2R_15227339_15227405_FBgn0265508_+	AAGGTGCAA	ACTAAATTATTCCACCCAAGCGA	2.22	0.2	66
2R_16774350_16774402_FBgn0011743_+	Arp53D	0.02	0.01	0.44	0.5	31.33	0.455	0.004438	0.03	0.02	0.4	0.44	16.8	0.395	0.002713	30.19	31.33	16.8	0.455	2R_16774350_16774402_FBgn0011743_+	TACGTAAGT	TTTGACCATGATTCGTTCAGCAA	9.27	2.17	52
3L_1554402_1554460_FBgn0035231_+	Pcyt2	0.06	0.03	0.48	0.52	11.11	0.455	0.003005	0.07	0.04	0.42	0.49	8.27	0.4	0.008941	33.9	11.11	8.27	0.455	3L_1554402_1554460_FBgn0035231_+	GAGGTAAGT	ACTTTTCGATCCATCACAAGATC	11.08	3.71	58
3L_20969864_20969917_FBgn0053287_-	CG33287	0.59	0.54	0.95	0.97	1.7	0.395	0.004615	0.55	0.54	1.03	0.97	1.83	0.455	0.004438	27.78	1.83	1.7	0.455	3L_20969864_20969917_FBgn0053287_-	GGAGTAGGT	TATTCAAAATCTCATTCAAGATC	3.34	3.21	53
3R_25038880_25038943_FBgn0039261_-	CG6422	0.15	0.19	0.65	0.6	3.68	0.455	0.004915	0.1	0.17	0.45	0.44	3.3	0.31	0.012759	50	3.68	3.3	0.455	3R_25038880_25038943_FBgn0039261_-	GGGGTAATA	AAGCCATTTCCTATTTGCAGGCA	4.06	6.76	63
3R_29933580_29933636_FBgn0260759_+	CG42557	0.04	0.04	0.52	0.47	12.38	0.455	0.003005	0.04	0.04	0.46	0.43	11.12	0.405	0.001369	45.61	12.38	11.12	0.455	3R_29933580_29933636_FBgn0260759_+	TTGGTACGG	CTAAATAGCATTCATTTCAGAGC	6.56	2.02	56
3R_29933580_29933636_FBgn0260760_+	CG42558	0.04	0.04	0.52	0.47	12.38	0.455	0.003005	0.04	0.04	0.46	0.43	11.12	0.405	0.001369	45.61	12.38	11.12	0.455	3R_29933580_29933636_FBgn0260760_+	TTGGTACGG	CTAAATAGCATTCATTTCAGAGC	6.56	2.02	56
X_3461196_3461246_FBgn0029660_+	CG10801	0.11	0.11	0.57	0.56	5.14	0.455	0.000121	0.11	0.1	0.56	0.56	5.33	0.455	0.000121	33.33	5.33	5.14	0.455	X_3461196_3461246_FBgn0029660_+	TGAGTAAGT	ATCGATTAATATATATTCAGATA	8.82	2.79	50
2L_13130761_13130820_FBgn0032471_+	CG5122	0.01	0.01	0.44	0.48	46	0.45	0.001969	0.01	0	0.38	0.41	79	0.39	0.00164	31.67	79	46	0.45	2L_13130761_13130820_FBgn0032471_+	CTCGTAAGT	CTAAATGTTATCACTGTTAGTGT	9.63	3.25	59
2L_14328719_14328774_FBgn0261529_+	ms(2)34Fe	0.03	0.04	0.41	0.43	12	0.385	0.000842	0.05	0.06	0.47	0.54	9.18	0.45	0.006116	39.29	12	9.18	0.45	2L_14328719_14328774_FBgn0261529_+	CTGGTGAGT	TTCAAAATGTTGCTTTCTAGGAT	10.1	9.33	55
2L_18683301_18683369_FBgn0086909_+	CG31751	0.53	0.46	0.85	1.03	1.9	0.445	0.044005	0.53	0.48	0.93	0.98	1.89	0.45	0.006116	28.99	1.9	1.89	0.45	2L_18683301_18683369_FBgn0086909_+	AAGGTATTT	TATGTTATGTTTTCCATTAGGTA	7.64	9.48	68
2R_5354046_5354108_FBgn0033020_+	COX4L	0.15	0.16	0.59	0.62	3.9	0.45	0.001232	0.15	0.17	0.53	0.56	3.41	0.385	0.002185	38.1	3.9	3.41	0.45	2R_5354046_5354108_FBgn0033020_+	AAAGCGAGT	GTGCTTGCGCATAATTACAGGTA	0.65	5.2	62
3L_1802754_1802803_FBgn0025820_-	JTBR	0.5	0.65	1.02	1.03	1.78	0.45	0.026785	0.44	0.49	0.75	0.76	1.62	0.29	0.00764	44	1.78	1.62	0.45	3L_1802754_1802803_FBgn0025820_-	CGAGTAATC	CACCTACTGAGCATGCATAGGTT	-1.56	-1.43	49
3L_20771609_20771667_FBgn0016696_+	Pitslre	0.64	0.51	1.01	1.04	1.78	0.45	0.021276	0.56	0.45	0.85	0.8	1.63	0.32	0.033845	42.37	1.78	1.63	0.45	3L_20771609_20771667_FBgn0016696_+	GAAGTGCGT	AAATGCTGATTAACCGCCAGCCA	4.88	0.15	58
3L_999683_1000377_FBgn0024277_-	trio	0.45	0.28	0.79	0.84	2.23	0.45	0.036648	0.12	0.15	0.27	0.24	1.89	0.12	0.029857	39.71	2.23	1.89	0.45	3L_999683_1000377_FBgn0024277_-	TTTGTAAGC	CGCTTTTCCCACTCTTTCAGGCC	3.93	11.11	694
3R_12061126_12061182_FBgn0037988_-	CG14740	0.03	0.03	0.29	0.3	9.83	0.265	0.000356	0.04	0.05	0.48	0.51	11	0.45	0.001232	24.56	11	9.83	0.45	3R_12061126_12061182_FBgn0037988_-	AAGGTGAAT	AATATTTTCTCTCTTAATAGATA	6.38	8.99	56
3R_18291504_18291654_FBgn0010877_-	l(3)05822	0.3	0.43	0.79	0.84	2.23	0.45	0.023123	0.22	0.26	0.58	0.56	2.38	0.33	0.00456	41.72	2.38	2.23	0.45	3R_18291504_18291654_FBgn0010877_-	GTCGTGAGT	CCCTTTTGGGCCAATTGCAGATA	7.82	7.45	150
3R_20554200_20554252_FBgn0067782_-	att-ORFB	0.01	0.02	0.45	0.48	31	0.45	0.001232	0.01	0.02	0.39	0.48	29	0.42	0.011423	26.42	31	29	0.45	3R_20554200_20554252_FBgn0067782_-	CGGGTATGA	TCTACCATTTACTATTTCAGTGC	7.63	8.12	52
3R_20554200_20554252_FBgn0067783_-	DPCoAC	0.01	0.02	0.45	0.48	31	0.45	0.001232	0.01	0.02	0.39	0.48	29	0.42	0.011423	26.42	31	29	0.45	3R_20554200_20554252_FBgn0067783_-	CGGGTATGA	TCTACCATTTACTATTTCAGTGC	7.63	8.12	52
3R_27465038_27465087_FBgn0039518_+	CG13978	0.04	0.04	0.41	0.45	10.75	0.39	0.00262	0.05	0.05	0.47	0.53	10	0.45	0.004415	26	10.75	10	0.45	3R_27465038_27465087_FBgn0039518_+	AAGGTAACT	AATCACAAAGTACTTTTCAGGAG	9.01	-0.99	49
3R_29499316_29499371_FBgn0039668_-	Trc8	0.24	0.16	0.7	0.6	3.25	0.45	0.019652	0.29	0.21	0.71	0.68	2.78	0.445	0.009091	30.36	3.25	2.78	0.45	3R_29499316_29499371_FBgn0039668_-	TACGTATGT	ATATACCATGCATATAATAGCTG	5.54	1.2	55
4_115203_115257_FBgn0011747_-	Ank	0	0	0.33	0.5	NA	0.415	0.039483	0	0	0.4	0.5	NA	0.45	0.012122	40	0	0	0.45	4_115203_115257_FBgn0011747_-	CTGGTAAGT	AAGTTATCCCTCTCAATCAGATC	10.65	5.17	54
X_20933264_20933320_FBgn0031139_-	CG11227	0.16	0.18	0.6	0.64	3.65	0.45	0.00246	0.08	0.09	0.39	0.4	4.65	0.31	0.00052	26.32	4.65	3.65	0.45	X_20933264_20933320_FBgn0031139_-	AGAGTATGT	ACTTTGTTTCAATAACTTAGAGT	5.66	5.55	56
X_5707311_5707372_FBgn0029791_+	CG4096	0	0	0.33	0.33	NA	0.33	0	0	0	0.5	0.4	NA	0.45	0.012122	43.55	0	0	0.45	X_5707311_5707372_FBgn0029791_+	AGAGTAAGT	TCGATATCTCCTCCACCTAGATA	9.35	6.76	61
2L_17048066_17048128_FBgn0032625_-	CG15136	0.09	0.04	0.48	0.54	7.85	0.445	0.007613	0.15	0.15	0.34	0.36	2.33	0.2	0.002491	36.51	7.85	2.33	0.445	2L_17048066_17048128_FBgn0032625_-	CCGGTAAGA	TCAACTGAGCATTTAAGCAGAAT	10.1	-3.17	62
2R_5702813_5702866_FBgn0259978_+	vlc	0.39	0.4	0.84	0.84	2.13	0.445	0.000126	0.31	0.34	0.73	0.74	2.26	0.41	0.001484	29.63	2.26	2.13	0.445	2R_5702813_5702866_FBgn0259978_+	ACGGTTAAG	CAATGCTTTTTATACAACAGGCT	-0.66	5.21	53
2R_9128311_9128370_FBgn0027561_-	CG18659	0.09	0.03	0.51	0.5	8.42	0.445	0.004639	0.07	0.03	0.45	0.5	9.5	0.425	0.005627	43.33	9.5	8.42	0.445	2R_9128311_9128370_FBgn0027561_-	AGTGTAAGT	ATCCACTTGTCCTTGAACAGCAC	8.46	5.96	59
3L_2245593_2245645_FBgn0052301_+	CG32301	0.03	0	0.35	0.4	25	0.36	0.006495	0.14	0.09	0.62	0.5	4.87	0.445	0.020676	33.96	25	4.87	0.445	3L_2245593_2245645_FBgn0052301_+	ACGGTGAGT	AAGCAATTAATTGCTCACAGACA	11.45	2.45	52
3R_13948999_13949082_FBgn0047199_+	CG31517	0.49	0.41	0.87	0.78	1.83	0.375	0.024822	0.4	0.39	0.88	0.8	2.13	0.445	0.008106	46.43	2.13	1.83	0.445	3R_13948999_13949082_FBgn0047199_+	GAGGTATGT	TACTTAACAATCTGGTCCAGACC	9.81	3.15	83
3R_30130405_30130457_FBgn0051029_-	CG31029	0.02	0.02	0.39	0.39	19.5	0.37	0	0.03	0.02	0.46	0.48	18.8	0.445	0.000631	39.62	19.5	18.8	0.445	3R_30130405_30130457_FBgn0051029_-	ATGGTGAGA	ATTAGACTCTCATCTTGCAGCTA	7.23	7.59	52
3R_5394103_5394230_FBgn0264712_+	CG1172	0.12	0.15	0.57	0.59	4.3	0.445	0.001637	0.13	0.16	0.37	0.38	2.59	0.23	0.004693	49.22	4.3	2.59	0.445	3R_5394103_5394230_FBgn0264712_+	GAGGTGAGT	ATATGTCGGTTTGCCCGTAGATC	10.03	9.01	127
3R_5600168_5600287_FBgn0250753_-	kra	0.05	0.05	0.52	0.47	9.9	0.445	0.003141	0.65	0.75	0.96	0.93	1.35	0.245	0.042523	42.5	9.9	1.35	0.445	3R_5600168_5600287_FBgn0250753_-	GAGGTAAGA	TATTCTCGCACGTTCGTTAGTTG	10.06	2.72	119
3R_9356326_9356423_FBgn0263750_+	CG43675	0.32	0.31	0.74	0.78	2.41	0.445	0.002139	0.23	0.23	0.6	0.6	2.61	0.37	0	53.06	2.61	2.41	0.445	3R_9356326_9356423_FBgn0263750_+	AGGGTACTG	ACTTCGATGCGATGTTGCAGCAC	4.5	4.53	97
3R_9356326_9356423_FBgn0266410_+	CG45050	0.32	0.31	0.74	0.78	2.41	0.445	0.002139	0.23	0.23	0.6	0.6	2.61	0.37	0	53.06	2.61	2.41	0.445	3R_9356326_9356423_FBgn0266410_+	AGGGTACTG	ACTTCGATGCGATGTTGCAGCAC	4.5	4.53	97
X_21146604_21146699_FBgn0266647_-	CG45154	0.29	0.27	0.65	0.6	2.23	0.345	0.006036	0.32	0.32	0.74	0.79	2.39	0.445	0.003141	31.25	2.39	2.23	0.445	X_21146604_21146699_FBgn0266647_-	GTGGTCAGT	CGTTTACATATTATTTACAGAAG	4.85	5.15	95
X_9264329_9264401_FBgn0052703_-	Erk7	0.03	0.05	0.45	0.4	10.63	0.385	0.004856	0.04	0.05	0.51	0.47	10.89	0.445	0.002139	42.47	10.89	10.63	0.445	X_9264329_9264401_FBgn0052703_-	CAAGTGGGT	TGCCTTTTACCTTTTACCAGCTA	4.82	7.24	72
2L_6118569_6118629_FBgn0051642_+	CG31642	0.01	0.03	0.5	0.42	23	0.44	0.008667	0.01	0.02	0.45	0.37	27.33	0.395	0.010255	36.07	27.33	23	0.44	2L_6118569_6118629_FBgn0051642_+	AGAGTAAGT	CACATTTCAATTTTAAATAGGGT	9.35	7.13	60
2R_10032126_10032213_FBgn0033474_-	CG1407	0.02	0.02	0.45	0.47	23	0.44	0.000516	0.01	0.02	0.43	0.45	29.33	0.425	0.000691	36.36	29.33	23	0.44	2R_10032126_10032213_FBgn0033474_-	CAAGTGAGT	TGCTTTTCTCCCGTTTTTAGTGG	9.1	10.15	87
3R_30696205_30696258_FBgn0000274_-	Pka-C2	0.02	0.02	0.48	0.44	23	0.44	0.00206	0.02	0.02	0.4	0.39	19.75	0.375	0.000178	38.89	23	19.75	0.44	3R_30696205_30696258_FBgn0000274_-	AAGGTGGGG	TCATCCTCAAATAATCACAGCGT	5.87	3.04	53
X_10821489_10821596_FBgn0262735_-	--	0.58	0.53	0.88	0.92	1.62	0.345	0.008502	0.65	0.62	1.07	1.08	1.69	0.44	0.001289	37.04	1.69	1.62	0.44	X_10821489_10821596_FBgn0262735_-	TAGGTAGAG	CTCACTTTCCAATTCTAAAGCCT	3.22	4.78	107
2L_15215543_15215613_FBgn0262875_+	CG43230	0.29	0.36	0.76	0.76	2.34	0.435	0.006412	0.31	0.44	0.76	0.71	1.96	0.36	0.035445	32.39	2.34	1.96	0.435	2L_15215543_15215613_FBgn0262875_+	ATGGTTTGT	TTCCCCCCCCATTTTGATAGGAA	4.88	7.51	70
2L_16177252_16177335_FBgn0001991_+	Ca-alpha1D	0.02	0.05	0.5	0.36	12.29	0.395	0.031313	0	0.08	0.54	0.41	11.88	0.435	0.029431	33.33	12.29	11.88	0.435	2L_16177252_16177335_FBgn0001991_+	AATGTATGG	GTAATCTTATGCCTTTATAGGGA	3.37	8.15	83
2R_23309523_23309578_FBgn0034842_-	Prosbeta5R1	0.02	0.01	0.43	0.47	30	0.435	0.002238	0.02	0.01	0.39	0.39	26	0.375	0.000178	32.14	30	26	0.435	2R_23309523_23309578_FBgn0034842_-	AGAGTTAGT	AGATTGAAACTCTTCTCAAGCCC	0.9	-0.14	55
3R_5556713_5556769_FBgn0037338_+	Snm1	0	0.12	0.45	0.43	7.33	0.38	0.024679	0	0.06	0.55	0.38	15.5	0.435	0.040357	21.05	15.5	7.33	0.435	3R_5556713_5556769_FBgn0037338_+	CCGGTAAGT	GCGATATTATTTTGTTTCAGAGC	10.91	8.13	56
4_481705_481810_FBgn0039908_-	Asator	0.02	0.02	0.39	0.52	22.75	0.435	0.021607	0.02	0.01	0.34	0.4	24.67	0.355	0.00726	34.91	24.67	22.75	0.435	4_481705_481810_FBgn0039908_-	TCCGTAAGT	ATGGATTTATTTTTTTTTAGAAA	10.27	6.83	105
X_10762435_10764169_FBgn0052675_-	Tango5	0.29	0.41	0.86	0.71	2.24	0.435	0.045453	0.76	0.75	0.81	0.83	1.09	0.065	0.028334	39.14	2.24	1.09	0.435	X_10762435_10764169_FBgn0052675_-	CAGGTAAAC	AAAAACCGTGAAAAACACAGCCG	7.82	-2.11	1734
X_19198782_19199272_FBgn0030997_-	CG7990	0.31	0.33	0.64	0.79	2.23	0.395	0.034789	0.14	0.25	0.58	0.68	3.23	0.435	0.027978	40.12	3.23	2.23	0.435	X_19198782_19199272_FBgn0030997_-	CGCGTGAGT	TGTATGGCATTCGTTACCAGGTC	8.4	6.6	490
2L_18676173_18676237_FBgn0086681_-	Mst36Fa	0.06	0.05	0.48	0.49	8.82	0.43	0.00027	0.04	0.04	0.38	0.43	10.12	0.365	0.004659	38.46	10.12	8.82	0.43	2L_18676173_18676237_FBgn0086681_-	AAAGTAAGG	ACATATGTGTTCTATTGCAGAAA	6.6	10.42	64
2R_10904100_10904157_FBgn0033572_+	polyph	0.02	0.02	0.41	0.49	22.5	0.43	0.008543	0.03	0.03	0.4	0.5	15	0.42	0.013878	46.55	22.5	15	0.43	2R_10904100_10904157_FBgn0033572_+	TCTGTAAGT	AATATCTATGGAACCAACAGATA	7.96	2.53	57
2R_14371450_14371503_FBgn0050072_+	Obp50c	0.02	0	0.37	0.39	38	0.37	0.001458	0.02	0	0.44	0.44	44	0.43	0.00054	38.89	44	38	0.43	2R_14371450_14371503_FBgn0050072_+	CCTGTGAGT	AAAAGAGAATCTTTTCGCAGTGC	7.21	1.16	53
2R_14371450_14371503_FBgn0050073_+	Obp50b	0.02	0	0.37	0.39	38	0.37	0.001458	0.02	0	0.44	0.44	44	0.43	0.00054	38.89	44	38	0.43	2R_14371450_14371503_FBgn0050073_+	CCTGTGAGT	AAAAGAGAATCTTTTCGCAGTGC	7.21	1.16	53
2R_8709233_8709293_FBgn0033324_-	CG14744	0.05	0.04	0.4	0.55	10.56	0.43	0.029224	0.03	0.03	0.35	0.47	13.67	0.38	0.024036	39.34	13.67	10.56	0.43	2R_8709233_8709293_FBgn0033324_-	AATGTAAGA	GCATTTGTTGGCTCTTACAGATG	5.55	9.41	60
3L_18869331_18869426_FBgn0036820_+	Grx1	0.24	0.2	0.63	0.67	2.95	0.43	0.004299	0.37	0.29	0.61	0.71	2	0.33	0.035648	38.54	2.95	2	0.43	3L_18869331_18869426_FBgn0036820_+	ATGGTAATT	TTAGAGATAATTCTCCGCAGCTT	6.49	1.91	95
3R_31463485_31463541_FBgn0039850_+	CG11333	0.15	0.17	0.54	0.64	3.69	0.43	0.013772	0.12	0.16	0.5	0.53	3.68	0.375	0.004415	47.37	3.69	3.68	0.43	3R_31463485_31463541_FBgn0039850_+	CTGGTGAGA	CTAATGGATTCACATTCCAGCTG	7.54	4.27	56
3R_5830348_5830394_FBgn0037385_+	glob3	0.03	0.03	0.39	0.41	13.33	0.37	0.00073	0.05	0.05	0.46	0.5	9.6	0.43	0.002156	36.17	13.33	9.6	0.43	3R_5830348_5830394_FBgn0037385_+	TAGGTGGGT	CTGAAAAAATTACTTGACAGCTT	5.56	2.94	46
3R_7907498_7907561_FBgn0024909_+	Taf7	0.2	0.19	0.5	0.63	2.9	0.37	0.02967	0.19	0.19	0.55	0.69	3.26	0.43	0.025492	32.81	3.26	2.9	0.43	3R_7907498_7907561_FBgn0024909_+	TTGGTAAAA	CAGGGCTTATATTTCTGCAGATG	3.23	7.5	63
X_12627145_12627215_FBgn0030409_+	CG15728	0.03	0.03	0.47	0.45	15.33	0.43	0.00054	0.03	0.01	0.13	0.12	6.25	0.105	0.011149	45.07	15.33	6.25	0.43	X_12627145_12627215_FBgn0030409_+	AAGGTGAAG	GCATAACTCCCTTTTTCCAGCTT	5.73	5.75	70
2L_123259_123324_FBgn0266304_+	CR44969	0.47	0.52	0.78	0.85	1.65	0.32	0.017591	0.55	0.57	0.98	0.99	1.76	0.425	0.000691	43.94	1.76	1.65	0.425	2L_123259_123324_FBgn0266304_+	GTGGTAATA	TCTCCCGTCCGTAACCGTAGGTG	3.78	8.52	65
2L_6624768_6624827_FBgn0085374_+	CG34345	0	0	0.35	0.4	NA	0.375	0.004415	0	0	0.35	0.5	NA	0.425	0.029759	30	0	0	0.425	2L_6624768_6624827_FBgn0085374_+	TACGTAAGT	AACCAATTTAACACTTCCAGATG	9.27	5.43	59
2R_11844673_11844818_FBgn0265363_-	CR44304	0.78	0.86	1.03	1.03	1.26	0.21	0.034419	0.14	0.09	0.57	0.51	4.7	0.425	0.008337	42.47	4.7	1.26	0.425	2R_11844673_11844818_FBgn0265363_-	CCGGTAGGT	CTCAATTAATTTTGCTTCAGGTT	9.39	7.08	145
2R_22819584_22819641_FBgn0050271_+	CG30271	0.03	0.02	0.42	0.46	17.6	0.415	0.002459	0.04	0.04	0.45	0.48	11.62	0.425	0.001243	53.45	17.6	11.62	0.425	2R_22819584_22819641_FBgn0050271_+	ATGGTGAGG	ACTTCCGACCATCCGCACAGAAT	7.61	4.96	57
3R_16267438_16267512_FBgn0020399_+	Mst89B	0.07	0.08	0.48	0.52	6.67	0.425	0.002345	0.08	0.09	0.48	0.51	5.82	0.41	0.001484	44	6.67	5.82	0.425	3R_16267438_16267512_FBgn0020399_+	AGGGTCTGT	ATACATGTCTTTTTCTACAGGAA	2.7	9.93	74
3R_25109913_25109979_FBgn0039277_-	CG13650	0.17	0	0.56	0.46	6	0.425	0.049849	0	0	0.31	0.36	NA	0.335	0.005523	28.36	6	6	0.425	3R_25109913_25109979_FBgn0039277_-	TCGGTCGGT	ATTTCCGTACATATTTGCAGTTG	3.52	5.89	66
3R_4330249_4331001_FBgn0027866_-	CG9776	0.01	0.01	0.47	0.4	43.5	0.425	0.006714	0.04	0.06	0.11	0.1	2.1	0.055	0.038926	36.79	43.5	2.1	0.425	3R_4330249_4331001_FBgn0027866_-	ATGGTAAGA	TTTGTACCCGTGCATTGCAGCAA	9.48	6.3	752
X_12087277_12087350_FBgn0052657_+	CR32657	0.01	0	0.43	0.43	86	0.425	0.000138	0.02	0.01	0.41	0.43	28	0.405	0.000761	29.73	86	28	0.425	X_12087277_12087350_FBgn0052657_+	TTGGTAAGC	TACAACATTTGTATTTCTAGAGT	8.72	6.52	73
2L_3269987_3270043_FBgn0031513_+	CG3347	0.07	0.02	0.38	0.44	9.11	0.365	0.011254	0.08	0.01	0.43	0.5	10.33	0.42	0.013606	42.11	10.33	9.11	0.42	2L_3269987_3270043_FBgn0031513_+	GATGTAGGT	AAGTATTTGATCCTATATAGATG	4.9	4.46	56
2L_3887557_3889430_FBgn0000256_-	capu	0.1	0.09	0.53	0.5	5.42	0.42	0.001414	0.04	0.05	0.23	0.2	4.78	0.17	0.00854	37.94	5.42	4.78	0.42	2L_3887557_3889430_FBgn0000256_-	CGGGTAAGC	CAATGATTCCCTATTCACAGATC	9.14	6.75	1873
2R_10904096_10904157_FBgn0033572_+	polyph	0.28	0.27	0.56	0.62	2.15	0.315	0.009194	0.03	0.03	0.4	0.5	15	0.42	0.013878	46.77	15	2.15	0.42	2R_10904096_10904157_FBgn0033572_+	CTGGTCTGT	AATATCTATGGAACCAACAGATA	3.05	2.53	61
2R_13433341_13433400_FBgn0050065_+	CG30065	0.01	0.01	0.41	0.45	43	0.42	0.00226	0.02	0.01	0.38	0.41	26.33	0.38	0.001727	46.67	43	26.33	0.42	2R_13433341_13433400_FBgn0050065_+	TTGGTAGGT	ACGGTCTGTGGGCTTTTCAGCGC	7.03	7.53	59
3L_11562738_11562860_FBgn0036173_+	CG7394	0.38	0.42	0.8	0.84	2.05	0.42	0.004505	0.36	0.41	0.59	0.63	1.58	0.225	0.019652	30.89	2.05	1.58	0.42	3L_11562738_11562860_FBgn0036173_+	ATGGTACTG	CGAATTATTCCATTCCGAAGGCG	4.16	3.15	122
3L_20299476_20299534_FBgn0264464_+	CR43872	0.19	0.11	0.55	0.59	3.8	0.42	0.011149	0.66	0.5	0.94	0.93	1.61	0.355	0.047387	37.29	3.8	1.61	0.42	3L_20299476_20299534_FBgn0264464_+	CAGGTAAGT	GTAGTATGGAGTTTCGCAAGTGG	10.86	-8.78	58
3L_317657_317719_FBgn0085293_+	--	0.41	0.37	0.62	0.63	1.6	0.235	0.007608	0.45	0.36	0.8	0.85	2.04	0.42	0.014692	34.92	2.04	1.6	0.42	3L_317657_317719_FBgn0085293_+	TAGGTGGCT	ACATTGTCCTTTGTTTTCAGTCG	-1.05	8.64	62
3R_12040736_12040793_FBgn0037986_+	CG14736	0.03	0.02	0.46	0.43	17.8	0.42	0.001414	0.03	0.02	0.39	0.37	15.2	0.355	0.00099	36.21	17.8	15.2	0.42	3R_12040736_12040793_FBgn0037986_+	CCTGTATGA	TAAGCCAGCATATTTTTCAGCTG	0.57	1.34	57
3R_18251279_18251343_FBgn0038589_+	CG18598	0.28	0.25	0.65	0.7	2.55	0.41	0.005018	0.31	0.28	0.7	0.73	2.42	0.42	0.002541	52.31	2.55	2.42	0.42	3R_18251279_18251343_FBgn0038589_+	GAGGTGAGT	CCATGCCATACTCCTTGCAGTCC	10.03	7.03	64
3R_19841489_19841552_FBgn0051459_+	CG31459	0.01	0.01	0.4	0.46	43	0.42	0.005063	0.02	0.01	0.4	0.47	29	0.42	0.007012	26.56	43	29	0.42	3R_19841489_19841552_FBgn0051459_+	CAGGTGAAT	TATACCAACCCTTAAAAAAGATG	6.6	-0.18	63
3R_20554200_20557406_FBgn0067783_-	DPCoAC	0.04	0.06	0.11	0.12	2.3	0.065	0.028334	0.01	0.02	0.39	0.48	29	0.42	0.011423	40.82	29	2.3	0.42	3R_20554200_20557406_FBgn0067783_-	AAGGTGCGT	TCTACCATTTACTATTTCAGTGC	9.49	8.12	3206
X_15755287_15755346_FBgn0030685_-	Graf	0.03	0.02	0.44	0.45	17.8	0.42	0.000283	0.05	0.02	0.38	0.38	10.86	0.345	0.001885	41.67	17.8	10.86	0.42	X_15755287_15755346_FBgn0030685_-	AAAGTAGGC	ACGCTCCCCATAACTTTTAGACT	5	6.5	59
2L_6008038_6008095_FBgn0031762_-	CG9098	0	0	0.33	0.5	NA	0.415	0.039483	0	0	0.25	0.4	NA	0.325	0.049346	37.93	0	0	0.415	2L_6008038_6008095_FBgn0031762_-	TCGGTAATA	AGTTTCCCATATCCTCACAGAAC	5.91	7.21	57
2L_8200281_8200345_FBgn0031997_+	PGAP5	0.31	0.34	0.63	0.74	2.11	0.36	0.024172	0.33	0.32	0.71	0.77	2.28	0.415	0.005328	41.54	2.28	2.11	0.415	2L_8200281_8200345_FBgn0031997_+	TTAGTATGT	TACGCCTGATTGGGGCTTAGTTT	2.85	2.46	64
2R_19945387_19945438_FBgn0261580_-	CG42690	0.1	0.1	0.46	0.54	5	0.4	0.009852	0.04	0.05	0.42	0.5	10.22	0.415	0.009304	36.54	10.22	5	0.415	2R_19945387_19945438_FBgn0261580_-	AAAGCAAGT	TTACCCATGTCCTGTTTTAGGAA	1.97	10.93	51
2R_19945387_19945438_FBgn0262824_-	CG43195	0.1	0.1	0.46	0.54	5	0.4	0.009852	0.04	0.05	0.42	0.5	10.22	0.415	0.009304	36.54	10.22	5	0.415	2R_19945387_19945438_FBgn0262824_-	AAAGCAAGT	TTACCCATGTCCTGTTTTAGGAA	1.97	10.93	51
3L_15809532_15809593_FBgn0036532_+	CG13445	0	0	0.33	0.5	NA	0.415	0.039483	0	0	0.33	0.33	NA	0.33	0	40.32	0	0	0.415	3L_15809532_15809593_FBgn0036532_+	TTGGTGAGT	TCCAAGTCTATCCAATTTAGGTA	9.27	6.47	61
3L_2595976_2596031_FBgn0062517_+	CG16984	0.04	0.02	0.42	0.43	14.17	0.395	0.0008	0.04	0.03	0.45	0.45	12.86	0.415	0.000145	39.29	14.17	12.86	0.415	3L_2595976_2596031_FBgn0062517_+	ATCGTAGGG	AACTTTAAGCAATTTTGCAGCTG	-0.34	0.56	55
3L_2662749_2662818_FBgn0053234_+	CG33234	0.09	0.05	0.57	0.4	6.93	0.415	0.041535	0.08	0.06	0.44	0.31	5.36	0.305	0.043483	34.29	6.93	5.36	0.415	3L_2662749_2662818_FBgn0053234_+	ACTGTAAGC	CTATCACTTTCCCTTTTAAGAGG	4.95	7.78	69
3R_15348443_15348501_FBgn0261679_+	CG42726	0	0	0.33	0.5	NA	0.415	0.039483	0	0	0.33	0.29	NA	0.31	0.004137	42.37	0	0	0.415	3R_15348443_15348501_FBgn0261679_+	CGCGTGAGT	TGACTGAGATTTCCTTCCAGAGA	8.4	4.82	58
3R_15348443_15348501_FBgn0261680_+	CG42727	0	0	0.33	0.5	NA	0.415	0.039483	0	0	0.33	0.29	NA	0.31	0.004137	42.37	0	0	0.415	3R_15348443_15348501_FBgn0261680_+	CGCGTGAGT	TGACTGAGATTTCCTTCCAGAGA	8.4	4.82	58
3R_15793152_15793209_FBgn0038363_+	Acyp2	0.03	0.03	0.38	0.43	13.5	0.375	0.004415	0.03	0.02	0.41	0.47	17.6	0.415	0.005328	43.1	17.6	13.5	0.415	3R_15793152_15793209_FBgn0038363_+	AATGTAGGT	CATCGCCCACTAATTTGAAGGAA	5.12	5.15	57
2L_12808057_12808110_FBgn0264366_-	CR43818	0.45	0.46	0.73	0.7	1.57	0.26	0.003678	0.62	0.63	1.05	1.02	1.66	0.41	0.001484	35.19	1.66	1.57	0.41	2L_12808057_12808110_FBgn0264366_-	AAAGTAGGT	AAGCCCAAACAACCCAAAAGCCA	6.84	-6.86	53
2L_17704911_17704972_FBgn0262876_+	CG43231	0.04	0	0.44	0.42	21.5	0.41	0.002961	0.07	0.01	0.32	0.4	9	0.32	0.023555	43.55	21.5	9	0.41	2L_17704911_17704972_FBgn0262876_+	GTGGTACGT	AAAAAGAGCACGTTTCACAGATA	8.61	-1.45	61
2L_6154883_6154948_FBgn0051639_-	CG31639	0	0	0.4	0.42	NA	0.41	0.000594	0.08	0.08	0.43	0.44	5.44	0.355	0.000198	36.36	5.44	5.44	0.41	2L_6154883_6154948_FBgn0051639_-	TAGGTGAGT	AAAGTAGCCTCTGCCCGAAGCAA	8.83	-0.27	65
2L_6154896_6154948_FBgn0051639_-	CG31639	0	0	0.4	0.42	NA	0.41	0.000594	0	0	0.35	0.36	NA	0.355	0.000198	28.3	0	0	0.41	2L_6154896_6154948_FBgn0051639_-	TAGGTGAGT	GGTGTGTTTCTATAAAGTAGCCT	8.83	0.46	52
2L_9923301_9923365_FBgn0032163_-	TbCMF46	0.33	0.33	0.5	0.53	1.56	0.185	0.00651	0.02	0.04	0.5	0.38	14.67	0.41	0.02131	27.69	14.67	1.56	0.41	2L_9923301_9923365_FBgn0032163_-	GAGGTGAAT	TATATTGTTCATGCCACCAGGAT	5.37	6.69	64
2R_16825678_16825735_FBgn0085488_+	CG34459	0.06	0.05	0.49	0.44	8.45	0.41	0.003844	0.04	0.04	0.42	0.36	9.75	0.35	0.007267	39.66	9.75	8.45	0.41	2R_16825678_16825735_FBgn0085488_+	TTGGTTAGG	ACTGGTTGTTCGTCTTTCAGCCT	1.27	7.83	57
3L_4755702_4755820_FBgn0264473_+	CR43881	0.57	0.58	0.98	0.99	1.71	0.41	0.000297	0.58	0.54	0.94	0.89	1.63	0.355	0.008035	41.18	1.71	1.63	0.41	3L_4755702_4755820_FBgn0264473_+	TGGGTAAGG	TCATTGTGCACTCTGCTAAGCCT	9.08	1.8	118
3R_29593205_29593271_FBgn0086361_+	alph	0.6	0.61	1	1.03	1.68	0.41	0.001484	0.23	0.23	0.34	0.35	1.5	0.115	0.001885	46.27	1.68	1.5	0.41	3R_29593205_29593271_FBgn0086361_+	AAGGTCTTG	CTTGTGTCCTCGATCCGTAGATT	0.24	9.31	66
3R_9008906_9008963_FBgn0037654_+	CG11983	0.11	0.12	0.5	0.55	4.57	0.41	0.003844	0.11	0.14	0.47	0.5	3.88	0.36	0.003454	36.21	4.57	3.88	0.41	3R_9008906_9008963_FBgn0037654_+	ACGGTACAA	TATAAGTTGTATACCGACAGATA	4.76	4.72	57
2L_15258106_15258172_FBgn0045842_-	yuri	0.06	0.05	0.45	0.45	8.18	0.395	0.00016	0.24	0.25	0.64	0.66	2.65	0.405	0.000761	47.76	8.18	2.65	0.405	2L_15258106_15258172_FBgn0045842_-	AAAGTAGGT	ATGTTCTCTCTTCCCGCCAGTCA	6.84	9.27	66
2L_17528667_17528718_FBgn0032648_-	CG15144	0.05	0.05	0.46	0.45	9.1	0.405	0.000152	0.03	0.05	0.46	0.41	10.88	0.395	0.004615	44.23	10.88	9.1	0.405	2L_17528667_17528718_FBgn0032648_-	GCGGTGGGT	TTAGACATCCGTTTTTCCAGGAG	6.6	5.83	51
2L_21311033_21311192_FBgn0000370_+	crc	0.06	0.06	0.12	0.14	2.17	0.07	0.019804	0.31	0.28	0.63	0.77	2.37	0.405	0.029853	45.62	2.37	2.17	0.405	2L_21311033_21311192_FBgn0000370_+	AAAGTGAGT	CGTGGCAAATCAAAACTCAGTGG	8.4	-0.08	159
2L_8213024_8213108_FBgn0032001_+	CG8360	0.21	0.18	0.56	0.64	3.08	0.405	0.010944	0.32	0.29	0.56	0.51	1.75	0.23	0.015691	40	3.08	1.75	0.405	2L_8213024_8213108_FBgn0032001_+	TAGGTATGT	TTCTGTGTACGCCCCTGCAGCGA	7.76	8.71	84
2R_6600873_6600926_FBgn0033076_-	CG15233	0.05	0.04	0.29	0.43	8	0.315	0.046221	0.03	0.03	0.35	0.52	14.5	0.405	0.041336	40.74	14.5	8	0.405	2R_6600873_6600926_FBgn0033076_-	CAGGTAAGT	ACCTTTGGCTGATCCATCAGGTA	10.86	6.03	53
3L_10266953_10267026_FBgn0011569_-	can	0.02	0.07	0.39	0.45	9.33	0.375	0.010671	0.01	0.06	0.36	0.52	12.57	0.405	0.04026	36.49	12.57	9.33	0.405	3L_10266953_10267026_FBgn0011569_-	GATGTGAGT	CTCTTCATGCGCTCAATCAGGAA	7.77	6.68	73
3L_11522507_11522557_FBgn0036169_-	--	0.02	0.01	0.41	0.43	28	0.405	0.000761	0.01	0.01	0.39	0.41	40	0.39	0.000657	29.41	40	28	0.405	3L_11522507_11522557_FBgn0036169_-	CTGGTAAGA	ACTGTATTATTAAATCGTAGGCC	9.45	6.34	50
3L_11522507_11522557_FBgn0036170_-	CG11714	0.02	0.01	0.41	0.43	28	0.405	0.000761	0.01	0.01	0.39	0.41	40	0.39	0.000657	29.41	40	28	0.405	3L_11522507_11522557_FBgn0036170_-	CTGGTAAGA	ACTGTATTATTAAATCGTAGGCC	9.45	6.34	50
3L_19598094_19598155_FBgn0005386_-	ash1	0.08	0.02	0.42	0.49	9.1	0.405	0.012709	0.04	0.04	0.36	0.45	10.12	0.365	0.014862	38.71	10.12	9.1	0.405	3L_19598094_19598155_FBgn0005386_-	GAGGCAAGT	AAGTGTGTTGTTCTCCTCAGGAA	3.32	8.95	61
3L_19598257_19598370_FBgn0005386_-	ash1	0.32	0.21	0.62	0.72	2.53	0.405	0.032072	0.27	0.25	0.56	0.68	2.38	0.36	0.027382	40.35	2.53	2.38	0.405	3L_19598257_19598370_FBgn0005386_-	TAGGTAATG	ACAAAAGCGAACCTTTGCAGCTC	7.57	1.21	113
3L_3219345_3219430_FBgn0035421_+	CG12034	0.08	0.03	0.46	0.43	8.09	0.39	0.005542	0.1	0.06	0.5	0.47	6.06	0.405	0.003789	54.65	8.09	6.06	0.405	3L_3219345_3219430_FBgn0035421_+	ATGGTGAGA	CTAATCATGTGCACTTTCAGGGG	7.23	7.78	85
3R_17082508_17082663_FBgn0038476_+	kuk	0.09	0.14	0.48	0.56	4.52	0.405	0.013295	0.07	0.08	0.3	0.32	4.13	0.235	0.002256	39.74	4.52	4.13	0.405	3R_17082508_17082663_FBgn0038476_+	GTGGTAATT	TTGTTTGTGCTCCCTTGCAGAGA	5.8	11.28	155
3R_23507259_23507328_FBgn0085318_-	CG34289	0.6	0.67	1.03	1.05	1.64	0.405	0.007981	0.43	0.47	0.85	0.85	1.89	0.4	0.002491	40	1.89	1.64	0.405	3R_23507259_23507328_FBgn0085318_-	ACAGTACGC	CCCGTGCATTTTCTGTTTAGATG	4.43	8.75	69
3R_27264676_27264728_FBgn0039503_-	CG14262	0.01	0.01	0.38	0.45	41.5	0.405	0.007386	0.03	0.04	0.38	0.45	11.86	0.38	0.008546	28.3	41.5	11.86	0.405	3R_27264676_27264728_FBgn0039503_-	GAGGTTAGT	TTTAGTTAGTTATCCTTTAGAAA	7.15	1.16	52
3R_29723357_29723437_FBgn0024841_+	Pcd	0.05	0.06	0.42	0.46	8	0.385	0.002855	0.07	0.07	0.45	0.5	6.79	0.405	0.003789	44.44	8	6.79	0.405	3R_29723357_29723437_FBgn0024841_+	AAGGTATTC	GAGCTTTATTTTTCGCGCAGCCT	6.8	4.82	80
4_108373_108426_FBgn0085432_+	pan	0.34	0.37	0.79	0.73	2.14	0.405	0.006789	0.33	0.43	0.6	0.62	1.61	0.23	0.045799	35.19	2.14	1.61	0.405	4_108373_108426_FBgn0085432_+	TCCGTAAGT	ATAAAGAATCTGATTCGCAGGCT	10.27	2.27	53
2L_14291235_14291300_FBgn0263648_+	CR43639	0.82	0.8	1.15	1.27	1.49	0.4	0.022353	0.63	0.64	0.84	0.82	1.31	0.195	0.003271	39.39	1.49	1.31	0.4	2L_14291235_14291300_FBgn0263648_+	ATTGTAAGT	AAAAATTGCCATGAAAAAAGCAT	8.54	-3.76	65
2L_2264043_2264096_FBgn0031407_+	CG4270	0.02	0.02	0.3	0.34	16	0.3	0.004415	0.03	0.02	0.4	0.45	17	0.4	0.004038	38.89	17	16	0.4	2L_2264043_2264096_FBgn0031407_+	AAAGTGAGT	TCATACATGTCTTCCAATAGAGC	8.4	7.31	53
2L_6656142_6656195_FBgn0051633_-	CG31633	0.11	0.16	0.48	0.59	3.96	0.4	0.02206	0.11	0.16	0.43	0.51	3.48	0.335	0.019255	38.89	3.96	3.48	0.4	2L_6656142_6656195_FBgn0051633_-	GCTGTAAGT	TCGGCATAATCGTTGAATAGTAA	8.56	-0.44	53
2R_11258298_11258354_FBgn0033599_+	CG13223	0.1	0.1	0.5	0.5	5	0.4	0	0.14	0.14	0.5	0.5	3.57	0.36	0	31.58	5	3.57	0.4	2R_11258298_11258354_FBgn0033599_+	TTGGTAGGT	AGATTTACATTCCCCAAAAGCAT	7.03	1.42	56
2R_11281151_11281273_FBgn0033607_-	CG9062	0.22	0.15	0.57	0.57	3.08	0.385	0.008163	0.19	0.12	0.56	0.55	3.58	0.4	0.007722	41.46	3.58	3.08	0.4	2R_11281151_11281273_FBgn0033607_-	ATGGTAAAT	TATATATATCCGCCCCATAGGTT	6.41	8.99	122
2R_23138778_23138843_FBgn0050192_+	CG30192	0.01	0	0.36	0.36	72	0.355	0.000198	0.05	0.04	0.44	0.45	9.89	0.4	0.000312	37.88	72	9.89	0.4	2R_23138778_23138843_FBgn0050192_+	TAGGTGAGA	CTCGATAAATTCCAAAACAGATC	6.95	3.16	65
2R_24123312_24123364_FBgn0264297_-	CG43775	0.07	0.09	0.45	0.46	5.69	0.375	0.000888	0.1	0.13	0.52	0.51	4.48	0.4	0.001559	56.6	5.69	4.48	0.4	2R_24123312_24123364_FBgn0264297_-	CATGTGAGT	CCTGACACCCCTTTCCGCAGGAT	7.83	8.45	52
2R_24123312_24123364_FBgn0264298_-	CG43776	0.07	0.09	0.45	0.46	5.69	0.375	0.000888	0.1	0.13	0.52	0.51	4.48	0.4	0.001559	56.6	5.69	4.48	0.4	2R_24123312_24123364_FBgn0264298_-	CATGTGAGT	CCTGACACCCCTTTCCGCAGGAT	7.83	8.45	52
2R_24123312_24123364_FBgn0264299_-	CG43777	0.07	0.09	0.45	0.46	5.69	0.375	0.000888	0.1	0.13	0.52	0.51	4.48	0.4	0.001559	56.6	5.69	4.48	0.4	2R_24123312_24123364_FBgn0264299_-	CATGTGAGT	CCTGACACCCCTTTCCGCAGGAT	7.83	8.45	52
2R_6669233_6669329_FBgn0033086_+	CG9410	0.75	0.81	1.13	1.23	1.51	0.4	0.020596	0.64	0.67	0.81	0.82	1.24	0.16	0.009625	44.33	1.51	1.24	0.4	2R_6669233_6669329_FBgn0033086_+	CAGGTAAAT	TTGCTCTTATCCTGTTGCAGTGG	8.76	8.25	96
3L_17243766_17243813_FBgn0036703_+	CG7707	0.15	0.12	0.51	0.54	3.89	0.39	0.002946	0.15	0.15	0.55	0.55	3.67	0.4	0	47.92	3.89	3.67	0.4	3L_17243766_17243813_FBgn0036703_+	CAGGTGGGC	GATCCAACCGCCTTTCGCAGGTC	8.07	6.7	47
3L_18909885_18909980_FBgn0036829_-	Ir75d	0.29	0.37	0.72	0.74	2.21	0.4	0.010459	0.39	0.45	0.78	0.75	1.82	0.345	0.00932	32.29	2.21	1.82	0.4	3L_18909885_18909980_FBgn0036829_-	GAGGTTAGA	CGAACACTTTCCATTTCCAGCTA	4.15	7.94	95
3L_18909908_18909980_FBgn0036830_-	CG14077	0.29	0.37	0.72	0.74	2.21	0.4	0.010459	0.29	0.38	0.68	0.7	2.06	0.355	0.016447	28.77	2.21	2.06	0.4	3L_18909908_18909980_FBgn0036830_-	GAGGTTAGA	GAGTATATATAAATACACAGGAT	4.15	2.82	72
3L_2774494_2774567_FBgn0044452_+	Atg2	0.01	0.08	0.38	0.51	9.89	0.4	0.032415	0.05	0.07	0.33	0.45	6.5	0.33	0.032337	44.59	9.89	6.5	0.4	3L_2774494_2774567_FBgn0044452_+	GTGGTAAGC	TTCCGTGATTCGCCACCCAGAAA	8.15	4.76	73
3R_19327224_19327277_FBgn0265064_-	CR44175	0.07	0.05	0.17	0.14	2.58	0.095	0.034176	0.23	0.22	0.65	0.6	2.78	0.4	0.004038	27.78	2.78	2.58	0.4	3R_19327224_19327277_FBgn0265064_-	GAGGCTTGT	ATGAGATTCCAAACCTTTAGCTA	-1.39	1.84	53
2L_10989591_10989655_FBgn0026147_+	CG16833	0.01	0.01	0.41	0.4	40.5	0.395	0.00016	0.01	0.01	0.41	0.4	40.5	0.395	0.00016	36.92	40.5	40.5	0.395	2L_10989591_10989655_FBgn0026147_+	ATTGTAGGT	GTGTTCGATTTGCATTTCAGTTT	3.34	7.89	64
2L_6798517_6798678_FBgn0015777_-	nrv2	0.02	0.01	0.39	0.43	27.33	0.395	0.002713	0.24	0.2	0.38	0.37	1.7	0.155	0.017234	23.46	27.33	1.7	0.395	2L_6798517_6798678_FBgn0015777_-	CCGGTATGA	AATTATACACAATTTTCCAGGAT	8.14	5.64	161
2R_11308098_11308155_FBgn0033616_+	CG7745	0.09	0.15	0.45	0.52	4.04	0.365	0.015579	0.12	0.16	0.55	0.52	3.82	0.395	0.003982	53.45	4.04	3.82	0.395	2R_11308098_11308155_FBgn0033616_+	ATGGTGAGG	AATGTTGCCCTCCTTTCCAGTGG	7.61	8.79	57
3L_11079763_11080426_FBgn0020412_-	JIL-1	0.27	0.24	0.62	0.68	2.55	0.395	0.007133	0.08	0.05	0.31	0.4	5.46	0.29	0.025726	33.43	5.46	2.55	0.395	3L_11079763_11080426_FBgn0020412_-	AGGGTAAAG	TTGCATTCAATTAATTTCAGTTA	5.2	5.25	663
3L_7467664_7467723_FBgn0035786_+	Tsp66A	0.48	0.48	0.91	0.84	1.82	0.395	0.00776	0.47	0.47	0.69	0.66	1.44	0.205	0.005311	25	1.82	1.44	0.395	3L_7467664_7467723_FBgn0035786_+	ATTGTTTGT	ATTGTATTTAAATTTTACAGTAT	-7.13	5.31	59
3R_14641963_14642019_FBgn0038248_-	CG7886	0.02	0.01	0.42	0.4	27.33	0.395	0.0008	0.02	0.01	0.42	0.39	27	0.39	0.00164	61.4	27.33	27	0.395	3R_14641963_14642019_FBgn0038248_-	GTGGTAAGT	AACCGACTCCTCACCACCAGTTG	10.36	4.82	56
3R_16274876_16274953_FBgn0250823_+	gish	0.78	0.78	0.88	0.87	1.12	0.095	0.002759	0.1	0.08	0.48	0.49	5.39	0.395	0.0008	56.41	5.39	1.12	0.395	3R_16274876_16274953_FBgn0250823_+	TAAGTGAGT	AATTCGCACGCATCCCACAGATC	6.43	6.65	77
3R_16274882_16274953_FBgn0250823_+	gish	0.18	0.17	0.54	0.54	3.09	0.365	0.000188	0.1	0.08	0.48	0.49	5.39	0.395	0.0008	56.94	5.39	3.09	0.395	3R_16274882_16274953_FBgn0250823_+	AGTGTGAGT	AATTCGCACGCATCCCACAGATC	6.96	6.65	71
3R_23928554_23928610_FBgn0264740_-	CG43998	0.06	0.09	0.48	0.45	6.2	0.39	0.002946	0.04	0.08	0.43	0.48	7.58	0.395	0.006505	33.33	7.58	6.2	0.395	3R_23928554_23928610_FBgn0264740_-	AAGGTATGC	TATTTCAAATATGCTTTTAGGCA	9.55	5.61	56
3R_23928554_23928610_FBgn0264741_-	CG43999	0.06	0.09	0.48	0.45	6.2	0.39	0.002946	0.04	0.08	0.43	0.48	7.58	0.395	0.006505	33.33	7.58	6.2	0.395	3R_23928554_23928610_FBgn0264741_-	AAGGTATGC	TATTTCAAATATGCTTTTAGGCA	9.55	5.61	56
3R_30694348_30694400_FBgn0039796_-	CG12069	0.09	0.07	0.47	0.48	5.94	0.395	0.0008	0.09	0.07	0.44	0.47	5.69	0.375	0.002303	35.85	5.94	5.69	0.395	3R_30694348_30694400_FBgn0039796_-	GCGGTAAAT	GTGACGGGTTTCTTGTCCAGTTT	6.76	5.88	52
2L_10454194_10454250_FBgn0032253_-	LManI	0	0	0.4	0.38	NA	0.39	0.000657	0	0	0.31	0.27	NA	0.29	0.004723	26.32	0	0	0.39	2L_10454194_10454250_FBgn0032253_-	AAGGTATAT	TTTCTAAAACTTCAAATCAGGTC	7.84	5.62	56
2L_11343046_11343099_FBgn0032360_-	CG14926	0.05	0.05	0.41	0.47	8.8	0.39	0.005865	0.03	0.03	0.29	0.32	10.17	0.275	0.002962	50	10.17	8.8	0.39	2L_11343046_11343099_FBgn0032360_-	CAGGTGAGT	AAACCATGGAATGGTTTCAGATG	10.67	3.73	53
2L_15879507_15879559_FBgn0028935_-	CG7653	0.11	0.11	0.45	0.52	4.41	0.375	0.008599	0.1	0.12	0.48	0.52	4.55	0.39	0.003271	33.96	4.55	4.41	0.39	2L_15879507_15879559_FBgn0028935_-	AATGTAAAG	GTAATATTAACGCTTTTCAGTTG	0.58	5.22	52
2L_9176381_9177121_FBgn0041092_+	tai	0.25	0.25	0.71	0.57	2.56	0.39	0.030738	0.2	0.11	0.4	0.4	2.58	0.245	0.032119	41.97	2.58	2.56	0.39	2L_9176381_9177121_FBgn0041092_+	TTGGTGAGG	ACATTCTTCTCGTCCCCCAGCAG	6.9	7.69	740
2R_18972939_18972997_FBgn0267351_+	Topors	0.33	0.46	0.74	0.83	1.99	0.39	0.03872	0.32	0.4	0.68	0.73	1.96	0.345	0.018185	44.07	1.99	1.96	0.39	2R_18972939_18972997_FBgn0267351_+	ACTGTACGC	CAAGTTTCCTGCATTTTCAGGTG	3.13	8.73	58
2R_21669694_21669754_FBgn0034649_-	PIG-M	0.08	0.09	0.44	0.46	5.29	0.365	0.000937	0.09	0.09	0.49	0.47	5.33	0.39	0.000657	49.18	5.33	5.29	0.39	2R_21669694_21669754_FBgn0034649_-	CCAGTAAGC	TGACTTGCACTCGGTTACAGAGA	5.34	6.19	60
2R_21669694_21669754_FBgn0259725_-	CG42379	0.08	0.09	0.44	0.46	5.29	0.365	0.000937	0.09	0.09	0.49	0.47	5.33	0.39	0.000657	49.18	5.33	5.29	0.39	2R_21669694_21669754_FBgn0259725_-	CCAGTAAGC	TGACTTGCACTCGGTTACAGAGA	5.34	6.19	60
2R_21669694_21669754_FBgn0259726_-	CG42380	0.08	0.09	0.44	0.46	5.29	0.365	0.000937	0.09	0.09	0.49	0.47	5.33	0.39	0.000657	49.18	5.33	5.29	0.39	2R_21669694_21669754_FBgn0259726_-	CCAGTAAGC	TGACTTGCACTCGGTTACAGAGA	5.34	6.19	60
2R_21669694_21669754_FBgn0259727_-	CG42381	0.08	0.09	0.44	0.46	5.29	0.365	0.000937	0.09	0.09	0.49	0.47	5.33	0.39	0.000657	49.18	5.33	5.29	0.39	2R_21669694_21669754_FBgn0259727_-	CCAGTAAGC	TGACTTGCACTCGGTTACAGAGA	5.34	6.19	60
2R_22655082_22655173_FBgn0050196_-	CG30196	0.17	0.24	0.37	0.41	1.9	0.185	0.044346	0.09	0.18	0.58	0.47	3.89	0.39	0.031635	38.04	3.89	1.9	0.39	2R_22655082_22655173_FBgn0050196_-	CTGGTGCGT	ATCTGTCCTTTATCCTCTAGTAA	8.29	8.35	91
2R_5796327_5796384_FBgn0033042_+	Tsp42A	0.34	0.36	0.68	0.66	1.91	0.32	0.001947	0.02	0.09	0.42	0.47	8.09	0.39	0.011946	29.31	8.09	1.91	0.39	2R_5796327_5796384_FBgn0033042_+	AAGGTAAAT	TCCTGAAATCTGAATTTCAGGTC	8.88	7.25	57
2R_8133076_8133140_FBgn0005648_+	Pabp2	0.11	0.03	0.45	0.47	6.57	0.39	0.010993	0.17	0.07	0.49	0.48	4.04	0.365	0.018431	50.77	6.57	4.04	0.39	2R_8133076_8133140_FBgn0005648_+	TATGTAAGT	TCTGTCTTTCGTTCCAGAAGGGG	6.69	4.45	64
3L_184261_184317_FBgn0083976_-	CG34140	0	0	0.4	0.38	NA	0.39	0.000657	0.07	0	0.38	0.34	10.29	0.325	0.015038	42.11	10.29	10.29	0.39	3L_184261_184317_FBgn0083976_-	TCGGTAAGT	AAGACTTACCACCCCTACAGTGG	11.78	3.88	56
3L_184261_184317_FBgn0083992_-	Mkp	0	0	0.4	0.38	NA	0.39	0.000657	0.07	0	0.38	0.34	10.29	0.325	0.015038	42.11	10.29	10.29	0.39	3L_184261_184317_FBgn0083992_-	TCGGTAAGT	AAGACTTACCACCCCTACAGTGG	11.78	3.88	56
3L_19598257_19598385_FBgn0005386_-	ash1	0.29	0.15	0.56	0.66	2.77	0.39	0.045367	0.27	0.25	0.56	0.68	2.38	0.36	0.027382	41.09	2.77	2.38	0.39	3L_19598257_19598385_FBgn0005386_-	AGCGTAAGT	ACAAAAGCGAACCTTTGCAGCTC	10.07	1.21	128
3L_4883829_4883952_FBgn0035581_+	Dnah3	0.13	0.11	0.54	0.48	4.25	0.39	0.00651	0.15	0.1	0.46	0.49	3.8	0.35	0.006867	46.77	4.25	3.8	0.39	3L_4883829_4883952_FBgn0035581_+	ATGGTAGGT	GAACTCCAATCGTTCGACAGACT	8.6	5.29	123
3L_6530920_6530971_FBgn0052396_+	CG32396	0.02	0.01	0.37	0.39	25.33	0.365	0.000937	0.02	0.01	0.4	0.41	27	0.39	0.000329	40.38	27	25.33	0.39	3L_6530920_6530971_FBgn0052396_+	TCTGTGGGT	AAGTGTTCAACTTTTTCTAGTTC	0	4.61	51
3R_10349608_10349667_FBgn0051406_+	CG31406	0.03	0.02	0.35	0.41	15.2	0.355	0.00726	0.02	0.02	0.38	0.44	20.5	0.39	0.005865	11.67	20.5	15.2	0.39	3R_10349608_10349667_FBgn0051406_+	GAAGTAAGA	AAAATATATAATATATTTAGAAA	6.42	2.31	59
3R_13049642_13049710_FBgn0038115_-	CG7966	0	0	0.33	0.25	NA	0.29	0.018499	0	0	0.45	0.33	NA	0.39	0.02286	24.64	0	0	0.39	3R_13049642_13049710_FBgn0038115_-	CAGGTAAGA	TTAACTCCCAATCTCTTTAGTTC	10.77	7.11	68
3R_4241920_4241977_FBgn0037222_-	CG14642	0.07	0.09	0.48	0.41	5.56	0.365	0.0098	0.01	0.04	0.43	0.4	16.6	0.39	0.002946	55.17	16.6	5.56	0.39	3R_4241920_4241977_FBgn0037222_-	CGAGTGAGC	GACTGTAATTTTCCTCTTAGGGC	5.16	8.55	57
X_17077468_17077680_FBgn0030812_-	wcy	0.26	0.25	0.6	0.51	2.18	0.3	0.022028	0.25	0.26	0.68	0.61	2.53	0.39	0.008118	44.6	2.53	2.18	0.39	X_17077468_17077680_FBgn0030812_-	GCGGTAAGG	AAAAAGGAAGCTGTCTAAAGGAT	9.63	-6.73	212
X_20169417_20169473_FBgn0031093_-	CG9581	0.06	0.05	0.43	0.45	8	0.385	0.000842	0.07	0.05	0.45	0.45	7.5	0.39	0.000657	40.35	8	7.5	0.39	X_20169417_20169473_FBgn0031093_-	ATGGTGAGG	TAAACTTGAATCTCTGACAGCTC	7.61	5.51	56
X_6350239_6350292_FBgn0029868_-	ND-B16.6	0.14	0.2	0.55	0.57	3.29	0.39	0.00651	0.09	0.09	0.28	0.29	3.17	0.195	0.000657	46.3	3.29	3.17	0.39	X_6350239_6350292_FBgn0029868_-	AGCGTAAGT	ATATATACTTTGTACCACAGGAG	10.07	5.88	53
2L_17528493_17528558_FBgn0032648_-	CG15144	0.02	0	0.37	0.42	39.5	0.385	0.004856	0.01	0	0.32	0.37	69	0.34	0.005576	27.27	69	39.5	0.385	2L_17528493_17528558_FBgn0032648_-	CTGGTGGGT	TATATTTAAAAAATGTCCAGGTA	6.29	3.41	65
2L_6686500_6686562_FBgn0031849_-	CG11327	0.02	0.01	0.38	0.42	26.67	0.385	0.002855	0.01	0.01	0.28	0.3	29	0.28	0.001273	42.86	29	26.67	0.385	2L_6686500_6686562_FBgn0031849_-	AGGGTAAGT	TCATTTATGCGTCCAAATAGCCA	10.45	6.62	62
2R_7073144_7073200_FBgn0033141_-	CG12831	0.02	0.01	0.31	0.37	22.67	0.325	0.008644	0.03	0.01	0.37	0.44	20.25	0.385	0.008821	47.37	22.67	20.25	0.385	2R_7073144_7073200_FBgn0033141_-	TAAGTGGGT	TAGTCCTCACTTCGTTTCAGCTT	0.99	4.53	56
2R_8090718_8090779_FBgn0028561_+	sut3	0.03	0.01	0.38	0.43	20.25	0.385	0.004856	0.04	0.02	0.39	0.39	13	0.36	0.000771	40.32	20.25	13	0.385	2R_8090718_8090779_FBgn0028561_+	ATGGTGACA	TCCTTCTAATCCACCCATAGTCG	0.78	6.26	61
3L_20465352_20465411_FBgn0261832_-	CG42764	0.27	0.26	0.67	0.63	2.45	0.385	0.002855	0.33	0.3	0.63	0.73	2.16	0.365	0.019847	38.33	2.45	2.16	0.385	3L_20465352_20465411_FBgn0261832_-	ATTGTATGA	TGAAAACTGATCATACACAGCAT	-0.09	1.72	59
3R_10895119_10895175_FBgn0037856_+	Leash	0.17	0.04	0.5	0.48	4.67	0.385	0.027961	0.17	0.04	0.48	0.41	4.24	0.34	0.044053	26.32	4.67	4.24	0.385	3R_10895119_10895175_FBgn0037856_+	TGCGTAAGT	TCTTGTATCTATTTTTTTAGCAC	9.73	7.75	56
3R_15837681_15837737_FBgn0003483_+	spn-E	0.09	0	0.43	0.35	8.67	0.345	0.029132	0.08	0	0.43	0.42	10.62	0.385	0.010786	43.86	10.62	8.67	0.385	3R_15837681_15837737_FBgn0003483_+	GGGGTGAGA	TTATGTGTAATTCGATCCAGACG	4.74	5.48	56
3R_18598853_18598913_FBgn0038630_+	CG14305	0.76	0.76	1.1	1.09	1.44	0.335	0.000223	0.45	0.43	0.82	0.83	1.88	0.385	0.000842	37.7	1.88	1.44	0.385	3R_18598853_18598913_FBgn0038630_+	AGGGTAATT	GCCATTACCAAATCACCTAGTTG	6.62	1.52	60
3R_22212022_22212084_FBgn0038934_+	Gld2	0.12	0.08	0.46	0.51	4.85	0.385	0.006844	0.14	0.09	0.48	0.51	4.3	0.38	0.005835	42.86	4.85	4.3	0.385	3R_22212022_22212084_FBgn0038934_+	AAGGTATGA	TGGGTCTCTGGCTTTTCCAGAGC	9.11	8.59	62
3R_4878426_4878476_FBgn0020280_-	laf	0.01	0	0.38	0.4	78	0.385	0.000842	0.02	0	0.31	0.36	33.5	0.325	0.006794	43.14	78	33.5	0.385	3R_4878426_4878476_FBgn0020280_-	ATGGTAAGT	AATTGTAAAGCCCTCCCAAGTCC	11.01	-5.07	50
3R_7062510_7062575_FBgn0037464_+	CG1988	0.02	0.03	0.42	0.38	16	0.375	0.003009	0.04	0.04	0.43	0.42	10.62	0.385	0.000169	36.36	16	10.62	0.385	3R_7062510_7062575_FBgn0037464_+	AAGGCCGGT	TTCTCGTCTTTTGTCTTCAGGTA	-0.62	11.31	65
X_11092719_11092780_FBgn0027498_+	CG2061	0.56	0.53	0.97	0.89	1.71	0.385	0.01209	0.41	0.38	0.62	0.6	1.54	0.215	0.006958	32.26	1.71	1.54	0.385	X_11092719_11092780_FBgn0027498_+	TCGGTGATA	ATTTTCTGGTCAATCCGCAGCTT	1.46	7.26	61
X_11920338_11920409_FBgn0030357_-	Sclp	0.01	0	0.38	0.4	78	0.385	0.000842	0.01	0	0.32	0.34	66	0.325	0.001181	31.94	78	66	0.385	X_11920338_11920409_FBgn0030357_-	TTGGTAAGC	TACAACATTTGTATTTCTAGAGT	8.72	6.52	71
X_11920338_11920409_FBgn0052660_-	CR32660	0.01	0	0.38	0.4	78	0.385	0.000842	0.01	0	0.32	0.34	66	0.325	0.001181	31.94	78	66	0.385	X_11920338_11920409_FBgn0052660_-	TTGGTAAGC	TACAACATTTGTATTTCTAGAGT	8.72	6.52	71
Y_702654_702712_FBgn0058064_+	ARY	0	0	0.46	0.31	NA	0.385	0.035917	0	0.03	0.3	0.25	18.33	0.26	0.012342	23.73	18.33	18.33	0.385	Y_702654_702712_FBgn0058064_+	AAGGCAATA	AACTAACTTAATTTGAACAGCTT	0.73	2.66	58
2L_12917000_12917046_FBgn0040509_+	ACXB	0.03	0.02	0.43	0.38	16.2	0.38	0.004471	0.04	0.02	0.4	0.33	12.17	0.335	0.011602	40.43	16.2	12.17	0.38	2L_12917000_12917046_FBgn0040509_+	AAGGTGAAA	ACTTAATGGTTTCCTTGCAGGCC	4.51	9.66	46
2L_17528200_17528257_FBgn0032648_-	CG15144	0.05	0.04	0.43	0.42	9.44	0.38	0.000346	0.05	0.07	0.43	0.41	7	0.36	0.00154	34.48	9.44	7	0.38	2L_17528200_17528257_FBgn0032648_-	TAGGTAGCA	TATCAACTTGTCGTATTTAGGGA	2.58	8.95	57
2L_18007494_18007547_FBgn0261531_+	CG42659	0.01	0.01	0.39	0.39	39	0.38	0	0.02	0.02	0.33	0.33	16.5	0.31	0	31.48	39	16.5	0.38	2L_18007494_18007547_FBgn0261531_+	CCGGTGAGT	TTATAAAATAAGATTTGCAGACT	10.9	-2.21	53
2R_10246853_10246903_FBgn0033498_-	CG12209	0.04	0.03	0.42	0.41	11.86	0.38	0.000346	0.04	0.03	0.4	0.38	11.14	0.355	0.00099	33.33	11.86	11.14	0.38	2R_10246853_10246903_FBgn0033498_-	CCAGTAAGG	GCTTGAATTTGTATTCCCAGCAC	5.74	4	50
2R_13252424_13252497_FBgn0033819_-	CG4714	0.03	0.02	0.27	0.29	11.2	0.255	0.001917	0.04	0.03	0.4	0.43	11.86	0.38	0.001727	41.89	11.86	11.2	0.38	2R_13252424_13252497_FBgn0033819_-	GGGGTAAGT	TTCTTCTGTGACTTGAGCAGAAA	9.65	5	73
2R_24574216_24574283_FBgn0035027_+	CG3511	0.1	0	0.43	0.43	8.6	0.38	0.016876	0.14	0.1	0.54	0.44	4.08	0.37	0.020533	38.24	8.6	4.08	0.38	2R_24574216_24574283_FBgn0035027_+	ACGGTAAGG	GTACCAATCTCTAATTGCAGCCC	10.38	6.95	67
2R_9865228_9865289_FBgn0011241_-	cbx	0.04	0.06	0.45	0.41	8.6	0.38	0.003445	0.03	0.05	0.33	0.38	8.88	0.315	0.007228	37.1	8.88	8.6	0.38	2R_9865228_9865289_FBgn0011241_-	TGCGTTAGT	ATTTTATCTTTTGTTAATAGAGT	-4.28	6.39	61
3L_16705047_16705109_FBgn0036654_+	CG9692	0.1	0.07	0.49	0.44	5.47	0.38	0.005835	0.09	0.07	0.34	0.33	4.19	0.255	0.001917	39.68	5.47	4.19	0.38	3L_16705047_16705109_FBgn0036654_+	AAAGTAAGT	GATTCGAATTCCGATGTAAGCCA	9.72	-3.35	62
3L_16705047_16705113_FBgn0036654_+	CG9692	0.1	0.07	0.49	0.44	5.47	0.38	0.005835	0.43	0.45	0.62	0.65	1.44	0.195	0.008439	41.79	5.47	1.44	0.38	3L_16705047_16705113_FBgn0036654_+	AAAGTAAGT	CGAATTCCGATGTAAGCCAGAGC	9.72	-4.23	66
3L_17793542_17793612_FBgn0261998_-	CG42816	0.03	0.04	0.35	0.48	11.86	0.38	0.028193	0.03	0.03	0.36	0.4	12.67	0.35	0.003249	19.72	12.67	11.86	0.38	3L_17793542_17793612_FBgn0261998_-	TTAGTGAGT	TATTTATTTATTTATAATAGATC	5.79	6.16	70
3R_13632098_13632174_FBgn0038163_+	CG10841	0.01	0.01	0.38	0.4	39	0.38	0.000692	0.01	0.01	0.3	0.33	31.5	0.305	0.00241	38.96	39	31.5	0.38	3R_13632098_13632174_FBgn0038163_+	AGAGTGAGT	ATTTGAATGCCACCGTTTAGGAG	7.36	3	76
3R_13632098_13632177_FBgn0038163_+	CG10841	0.01	0.01	0.38	0.4	39	0.38	0.000692	0.74	0.75	0.82	0.83	1.11	0.08	0.007722	40	39	1.11	0.38	3R_13632098_13632177_FBgn0038163_+	AGAGTGAGT	TGAATGCCACCGTTTAGGAGGAG	7.36	-9.4	79
3R_30628667_30628720_FBgn0039792_-	CG2267	0.05	0.05	0.42	0.44	8.6	0.38	0.000692	0.03	0.03	0.38	0.4	13	0.36	0.000771	29.63	13	8.6	0.38	3R_30628667_30628720_FBgn0039792_-	GTGGTTGGT	GTATTATATATCCCTAATAGATG	2.44	6	53
X_16084020_16084073_FBgn0030725_+	CG8958	0.02	0	0.33	0.35	34	0.33	0.001832	0.02	0	0.39	0.39	39	0.38	0.000692	27.78	39	34	0.38	X_16084020_16084073_FBgn0030725_+	TGTGTAAGA	GAACCAATAATTTCCTCTAGCTA	3.68	4.23	53
X_1889295_1889357_FBgn0023518_-	trr	0	0	0.41	0.35	NA	0.38	0.006175	0	0	0.32	0.28	NA	0.3	0.004415	46.03	0	0	0.38	X_1889295_1889357_FBgn0023518_-	AGAGTGAGT	TTTGCTACACCGAAACACAGCCT	7.36	-1.43	62
X_479510_479629_FBgn0052817_+	CG32817	0.05	0.12	0.38	0.4	4.59	0.305	0.013946	0.12	0.08	0.54	0.42	4.8	0.38	0.026601	40	4.8	4.59	0.38	X_479510_479629_FBgn0052817_+	CAAGTAAAT	TTTTGCTATTTATTTTGCAGAGA	4.44	10.33	119
2L_10581441_10581501_FBgn0085190_-	CG34161	0.06	0.04	0.36	0.31	6.7	0.285	0.008808	0.02	0.01	0.41	0.37	26	0.375	0.003009	27.87	26	6.7	0.375	2L_10581441_10581501_FBgn0085190_-	AAGGTAAAT	TTAAATACATCACTTTTCAGGTG	8.88	8.34	60
2L_12043582_12044099_FBgn0032399_-	CG6785	0.11	0	0.44	0.42	7.82	0.375	0.021508	0.33	0.39	0.69	0.75	2	0.36	0.013606	30.69	7.82	2	0.375	2L_12043582_12044099_FBgn0032399_-	AAGGTAAGA	AAATATGGGCATGTATGCAGCTT	10.57	0.84	517
2R_20897755_20897830_FBgn0262690_+	CR43160	0.14	0.2	0.4	0.34	2.18	0.2	0.042174	0.21	0.21	0.56	0.61	2.79	0.375	0.004415	40.79	2.79	2.18	0.375	2R_20897755_20897830_FBgn0262690_+	CAGGTAAAG	AACCCCTTTTCTACCTTCAGGCC	9.65	9.73	75
2R_21501548_21501624_FBgn0034631_-	TAF1C-like	0.04	0.02	0.37	0.44	13.5	0.375	0.009291	0.06	0.1	0.41	0.4	5.06	0.325	0.004	41.56	13.5	5.06	0.375	2R_21501548_21501624_FBgn0034631_-	TCCGTAAGC	TATTTATACTCCAATTACAGACA	5.75	5.21	76
2R_21584327_21584386_FBgn0050222_+	CG30222	0.36	0.32	0.72	0.69	2.07	0.365	0.004659	0.35	0.33	0.72	0.71	2.1	0.375	0.000888	40	2.1	2.07	0.375	2R_21584327_21584386_FBgn0050222_+	AAGGTGGGA	TGCTTAACCCAACCCATCAGTTA	6.03	1.62	59
3L_1492230_1492313_FBgn0043458_-	CG12084	0.34	0.25	0.7	0.64	2.27	0.375	0.020173	0.39	0.31	0.71	0.65	1.94	0.33	0.022195	61.9	2.27	1.94	0.375	3L_1492230_1492313_FBgn0043458_-	GAGGTGGGT	ATGCCTACCTGCGCTTCCAGGTC	7.07	8.99	83
3R_12350466_12350543_FBgn0038013_-	CG10038	0.14	0.07	0.5	0.46	4.57	0.375	0.011359	0.14	0.09	0.42	0.43	3.7	0.31	0.006696	50	4.57	3.7	0.375	3R_12350466_12350543_FBgn0038013_-	TACGTAAGT	CAAATATTTCGACCCCTCAGAAG	9.27	4.91	77
3R_23093776_23093829_FBgn0039049_+	CG6726	0.01	0.02	0.33	0.34	22.33	0.32	0.000488	0	0	0.39	0.36	NA	0.375	0.001596	40.74	22.33	22.33	0.375	3R_23093776_23093829_FBgn0039049_+	ACAGTAAGG	TATCCCTATTTCCCTTGCAGCTG	5.42	12.01	53
3R_23093776_23093829_FBgn0039050_+	CG17110	0.01	0.02	0.33	0.34	22.33	0.32	0.000488	0	0	0.39	0.36	NA	0.375	0.001596	40.74	22.33	22.33	0.375	3R_23093776_23093829_FBgn0039050_+	ACAGTAAGG	TATCCCTATTTCCCTTGCAGCTG	5.42	12.01	53
3R_24939805_24939872_FBgn0029157_-	ssh	0.46	0.45	0.73	0.71	1.58	0.265	0.001775	0.52	0.49	0.89	0.87	1.74	0.375	0.002303	36.76	1.74	1.58	0.375	3R_24939805_24939872_FBgn0029157_-	AGCGTAAGC	CAAACCACTACTTCCTGCAGTAG	6.06	2.21	67
3R_25171695_25171758_FBgn0083946_-	lobo	0.04	0.04	0.38	0.45	10.38	0.375	0.008599	0.02	0.03	0.34	0.4	14.8	0.345	0.007682	46.88	14.8	10.38	0.375	3R_25171695_25171758_FBgn0083946_-	GAGGTGAGG	TACTGGCTAATCCCGAACAGGAT	8.41	3.86	63
2L_3447090_3447143_FBgn0031533_+	CG2772	0.01	0.01	0.37	0.33	35	0.34	0.003442	0.02	0.01	0.4	0.37	25.67	0.37	0.001821	38.89	35	25.67	0.37	2L_3447090_3447143_FBgn0031533_+	CAGGTGAGT	ATGAATCCAACTAATTGCAGACT	10.67	4.75	53
2L_7824352_7824427_FBgn0027515_+	CG7115	0.02	0.01	0.33	0.44	25.67	0.37	0.021561	0.04	0.03	0.36	0.41	11	0.35	0.005264	42.11	25.67	11	0.37	2L_7824352_7824427_FBgn0027515_+	AAGGTGGGA	TTTTAACCACACGCTTACAGAAT	6.03	4.64	75
2R_16027987_16028104_FBgn0034068_-	casp	0.46	0.52	0.88	0.84	1.76	0.37	0.009363	0.51	0.56	0.77	0.77	1.44	0.235	0.011129	38.98	1.76	1.44	0.37	2R_16027987_16028104_FBgn0034068_-	AAGGTTTGA	CTTTGTGTAATTTTTTGTAGTGA	5.13	6.69	117
2R_17565104_17565163_FBgn0034242_+	CG14480	0.01	0	0.35	0.38	73	0.36	0.001923	0.01	0	0.36	0.39	75	0.37	0.001821	38.33	75	73	0.37	2R_17565104_17565163_FBgn0034242_+	TGAGTAAGA	CATGCGTAATATACGTATAGAAA	5.11	0.99	59
2R_23272977_23273039_FBgn0003009_-	ord	0.17	0.14	0.47	0.52	3.19	0.34	0.007273	0.14	0.1	0.44	0.54	4.08	0.37	0.020533	46.03	4.08	3.19	0.37	2R_23272977_23273039_FBgn0003009_-	CAAGTAGGT	AACCAACATGTTTGCTGCAGAGA	7.33	5.04	62
2R_24125788_24125841_FBgn0264297_-	CG43775	0.16	0.16	0.51	0.55	3.31	0.37	0.002909	0.15	0.13	0.48	0.47	3.39	0.335	0.001112	61.11	3.39	3.31	0.37	2R_24125788_24125841_FBgn0264297_-	CGGGTGAGA	CTGATCATCTGCTCCTCCAGCTT	7.62	6.85	53
2R_24125788_24125841_FBgn0264298_-	CG43776	0.16	0.16	0.51	0.55	3.31	0.37	0.002909	0.15	0.13	0.48	0.47	3.39	0.335	0.001112	61.11	3.39	3.31	0.37	2R_24125788_24125841_FBgn0264298_-	CGGGTGAGA	CTGATCATCTGCTCCTCCAGCTT	7.62	6.85	53
2R_24125788_24125841_FBgn0264299_-	CG43777	0.16	0.16	0.51	0.55	3.31	0.37	0.002909	0.15	0.13	0.48	0.47	3.39	0.335	0.001112	61.11	3.39	3.31	0.37	2R_24125788_24125841_FBgn0264299_-	CGGGTGAGA	CTGATCATCTGCTCCTCCAGCTT	7.62	6.85	53
2R_9083977_9084032_FBgn0033371_+	CNT1	0.04	0.06	0.41	0.42	8.3	0.365	0.000937	0.11	0.1	0.45	0.5	4.52	0.37	0.004714	42.86	8.3	4.52	0.37	2R_9083977_9084032_FBgn0033371_+	CTCGTAAGT	CGCCCAGACACCTTGCCAAGGAC	9.63	-0.81	55
3L_20265807_20265865_FBgn0264468_-	CR43876	0.75	0.69	0.91	0.97	1.31	0.22	0.035236	0.81	0.78	1.18	1.15	1.47	0.37	0.003271	37.29	1.47	1.31	0.37	3L_20265807_20265865_FBgn0264468_-	TGGGTAGGT	GTAGCCTCTCCATAAACGAGCAA	6.86	-11.74	58
3L_20970446_20970500_FBgn0053287_-	CG33287	0.02	0.01	0.34	0.42	25.33	0.365	0.011979	0.01	0.01	0.34	0.42	38	0.37	0.011486	30.91	38	25.33	0.37	3L_20970446_20970500_FBgn0053287_-	GAAGTAAAG	AATTGCGATCCGTTTTATAGAGT	0.82	6.14	54
3R_20107525_20107572_FBgn0051206_-	CG31206	0.01	0.01	0.36	0.37	36.5	0.355	0.000198	0.01	0.01	0.38	0.38	38	0.37	0	39.58	38	36.5	0.37	3R_20107525_20107572_FBgn0051206_-	TCAGTAAGT	GATATCTAAAATCAAGTCAGTCA	9.14	-4.2	47
3R_20827339_20827925_FBgn0264839_+	CR44047	0.14	0	0.44	0.44	6.29	0.37	0.033979	0.06	0.04	0.26	0.22	4.8	0.19	0.013569	33.22	6.29	4.8	0.37	3R_20827339_20827925_FBgn0264839_+	CAGGTAATA	GACTTATTTTTCTTCATTAGTCT	8.55	6.03	586
3R_24129688_24129751_FBgn0039153_-	GatB	0.04	0	0.33	0.44	19.25	0.365	0.024758	0	0	0.38	0.36	NA	0.37	0.00073	37.5	19.25	19.25	0.37	3R_24129688_24129751_FBgn0039153_-	CCTGTAAGA	AATAAACTTCTCCTCCCCAGAAT	4.07	7.46	63
3R_29296994_29297054_FBgn0039659_-	CG14506	0.1	0.07	0.51	0.4	5.35	0.37	0.022927	0.1	0.13	0.47	0.41	3.83	0.325	0.010484	45.9	5.35	3.83	0.37	3R_29296994_29297054_FBgn0039659_-	CAGGTGAGA	TGAATTATCCACAATCCTAGCAA	9.22	2.18	60
3R_4946508_4946571_FBgn0266698_+	CR45188	0.14	0.13	0.43	0.5	3.44	0.33	0.011284	0.15	0.1	0.45	0.54	3.96	0.37	0.018813	25	3.96	3.44	0.37	3R_4946508_4946571_FBgn0266698_+	GTGGTGAAG	TATGCCTTCTTACTTTTTAGCGC	-0.37	10.67	63
3R_9632342_9632446_FBgn0266413_-	CR45053	0.42	0.49	0.83	0.82	1.81	0.37	0.009008	0.3	0.36	0.59	0.71	1.97	0.32	0.041246	42.86	1.97	1.81	0.37	3R_9632342_9632446_FBgn0266413_-	CTGGTACGA	CGAATTATTGATTTTTTCAGCGG	7.84	5.64	104
2L_11948035_11948104_FBgn0032385_+	CG16964	0.02	0.02	0.4	0.37	19.25	0.365	0.001685	0.03	0.02	0.33	0.31	12.8	0.295	0.001433	40	19.25	12.8	0.365	2L_11948035_11948104_FBgn0032385_+	CTAGTAAGT	CTTCCTGTCTCCGATTTTAGCAA	8.78	9.58	69
2L_13903932_13904397_FBgn0019890_-	Smg5	0.58	0.45	0.93	0.83	1.71	0.365	0.046952	0.56	0.6	0.71	0.71	1.22	0.13	0.02286	39.27	1.71	1.22	0.365	2L_13903932_13904397_FBgn0019890_-	AAGGTAATG	TGGTAATTTGTATGTTTCAGTAC	8.99	6.32	465
2L_14879189_14879237_FBgn0013300_-	ProtA	0.02	0.02	0.28	0.31	14.75	0.275	0.002962	0.01	0.01	0.36	0.39	37.5	0.365	0.001685	30.61	37.5	14.75	0.365	2L_14879189_14879237_FBgn0013300_-	ATGGTACGT	ATTCATTGGTGTCCTTTCAGGCA	9.89	7.86	48
2R_10731527_10731658_FBgn0033544_+	CG7220	0.65	0.61	0.96	1.03	1.58	0.365	0.011979	0.52	0.49	0.58	0.57	1.14	0.07	0.047421	37.88	1.58	1.14	0.365	2R_10731527_10731658_FBgn0033544_+	GCGGTATTT	TAAAAGCAGACTTTACGCAGAGC	4.94	-3.17	131
2R_15820818_15820886_FBgn0053465_-	CG33465	0	0	0.33	0.4	NA	0.365	0.00907	0	0	0.33	0.25	NA	0.29	0.018499	21.74	0	0	0.365	2R_15820818_15820886_FBgn0053465_-	AATGTTAGT	CTAATACTATCTGATTTTAGTGT	-1.83	6.6	68
2R_17732276_17732323_FBgn0034267_+	CG4984	0	0	0.26	0.31	NA	0.285	0.007607	0	0	0.29	0.44	NA	0.365	0.039723	52.08	0	0	0.365	2R_17732276_17732323_FBgn0034267_+	TGGGTAGGT	CGACGGCTCCTAATTGGCAGTCG	6.86	2.86	47
2R_22925485_22925548_FBgn0261564_+	Reep1	0.72	0.63	1.05	1.03	1.54	0.365	0.015579	0.79	0.67	1.06	1	1.41	0.3	0.046537	45.31	1.54	1.41	0.365	2R_22925485_22925548_FBgn0261564_+	CAGGTGAAA	TCTAATTAAATACCCTACAGTTT	5.07	4.45	63
3L_16602490_16602548_FBgn0036646_-	CR18217	0.03	0.04	0.45	0.35	11.43	0.365	0.018431	0.04	0.02	0.37	0.27	10.67	0.29	0.029552	54.24	11.43	10.67	0.365	3L_16602490_16602548_FBgn0036646_-	AAGGTAAGC	AAGTAATCCGCATTTCCTAGAGT	10.22	2.09	58
3L_21950401_21950455_FBgn0037143_+	CR7448	0.2	0.26	0.59	0.5	2.37	0.315	0.028236	0.22	0.24	0.66	0.53	2.59	0.365	0.030964	43.64	2.59	2.37	0.365	3L_21950401_21950455_FBgn0037143_+	CAGGTGGGT	ACGCCGGAAATTCTTCATAGGTG	8.56	4.23	54
3L_3042773_3043044_FBgn0040308_+	Jafrac2	0.28	0.29	0.64	0.66	2.28	0.365	0.000937	0.23	0.22	0.58	0.57	2.56	0.35	0.000408	34.56	2.56	2.28	0.365	3L_3042773_3043044_FBgn0040308_+	TGGGTATGT	GTACGTGGATCTCGTTTCAGCCC	7.43	5.48	271
3L_9441967_9442123_FBgn0035993_-	Nf-YA	0.08	0.08	0.47	0.42	5.56	0.365	0.004659	0.21	0.21	0.46	0.43	2.12	0.235	0.00405	43.95	5.56	2.12	0.365	3L_9441967_9442123_FBgn0035993_-	GTGGTAAGT	GGCTTCATTCACTTTTCCAGTAA	10.36	6.07	156
3R_27259798_27259856_FBgn0010328_-	woc	0.05	0	0.36	0.42	15.6	0.365	0.011254	0.01	0	0.13	0.16	29	0.14	0.012516	28.81	29	15.6	0.365	3R_27259798_27259856_FBgn0010328_-	AACGTAAAT	AATGTCCCCGATAATTGCAGACT	0.44	5.5	58
3R_29995079_29995149_FBgn0039730_-	CG7903	0.09	0.13	0.42	0.41	3.77	0.305	0.004538	0.08	0.07	0.45	0.43	5.87	0.365	0.000937	50.7	5.87	3.77	0.365	3R_29995079_29995149_FBgn0039730_-	ACTGTACGT	ATGCTAGCTTTATCCTGCAGACC	6.33	6.98	70
3R_31463752_31463813_FBgn0039850_+	CG11333	0.2	0.21	0.53	0.61	2.78	0.365	0.011979	0.2	0.21	0.49	0.49	2.39	0.285	0.000308	45.16	2.78	2.39	0.365	3R_31463752_31463813_FBgn0039850_+	GAGGTGGGT	CCCGCTTCCACATGATTTAGACA	7.07	5.36	61
3R_4252243_4252297_FBgn0250821_-	CG14644	0	0	0.29	0.35	NA	0.32	0.008675	0	0.01	0.32	0.42	74	0.365	0.018431	32.73	74	74	0.365	3R_4252243_4252297_FBgn0250821_-	GATGTAAGT	CGTTATGATATATTCGGCAGCAA	9.11	2.16	54
2L_1110424_1110479_FBgn0031301_+	CG14339	0.02	0.08	0.26	0.24	5	0.2	0.0241	0.05	0.13	0.39	0.51	5	0.36	0.03786	41.07	5	5	0.36	2L_1110424_1110479_FBgn0031301_+	GCGGTGCGT	GTTGCTTCTCCAATCTCCAGAAT	8.66	6.85	55
2L_8200281_8200350_FBgn0031997_+	PGAP5	0.31	0.34	0.63	0.74	2.11	0.36	0.024172	0.85	0.87	0.95	0.94	1.1	0.085	0.016865	40	2.11	1.1	0.36	2L_8200281_8200350_FBgn0031997_+	TTAGTATGT	CTGATTGGGGCTTAGTTTAGACT	2.85	-1.54	69
2R_13249498_13250008_FBgn0033818_-	CG4712	0.02	0.03	0.37	0.4	15.4	0.36	0.001923	0.01	0	0.16	0.2	36	0.175	0.013595	35.81	36	15.4	0.36	2R_13249498_13250008_FBgn0033818_-	GAAGTAGGT	TCTGAAACATCTCCATTTAGAAA	6.22	4.75	510
2R_14669924_14669973_FBgn0033955_+	CG12866	0.01	0	0.38	0.3	68	0.335	0.014173	0.02	0	0.41	0.33	37	0.36	0.012865	34	68	37	0.36	2R_14669924_14669973_FBgn0033955_+	TTGGTAGGT	TCGATGAATAATAGTACTAGCCT	7.03	-8.78	49
2R_22659978_22660035_FBgn0034758_+	CG13510	0.34	0.37	0.66	0.69	1.9	0.32	0.004366	0.33	0.32	0.68	0.69	2.11	0.36	0.000386	53.45	2.11	1.9	0.36	2R_22659978_22660035_FBgn0034758_+	CTGGTGAGT	TTGCTAACCTGATTCTCCAGCTG	10.1	6	57
2R_22659978_22660035_FBgn0034759_+	CG13511	0.34	0.37	0.66	0.69	1.9	0.32	0.004366	0.33	0.32	0.68	0.69	2.11	0.36	0.000386	53.45	2.11	1.9	0.36	2R_22659978_22660035_FBgn0034759_+	CTGGTGAGT	TTGCTAACCTGATTCTCCAGCTG	10.1	6	57
2R_22659978_22660035_FBgn0260767_+	CG42565	0.34	0.37	0.66	0.69	1.9	0.32	0.004366	0.33	0.32	0.68	0.69	2.11	0.36	0.000386	53.45	2.11	1.9	0.36	2R_22659978_22660035_FBgn0260767_+	CTGGTGAGT	TTGCTAACCTGATTCTCCAGCTG	10.1	6	57
2R_24602912_24602968_FBgn0035034_+	CG3565	0.06	0.04	0.38	0.42	8	0.35	0.004057	0.08	0.07	0.42	0.45	5.8	0.36	0.001923	36.84	8	5.8	0.36	2R_24602912_24602968_FBgn0035034_+	TCGGTGGGC	ACCATTTGCTTACATTGCAGGTC	5.46	8.79	56
3L_10898445_10898735_FBgn0036111_-	Aps	0.78	0.69	1	0.97	1.34	0.25	0.034166	0.68	0.63	1.01	1.02	1.55	0.36	0.004978	39.86	1.55	1.34	0.36	3L_10898445_10898735_FBgn0036111_-	CGAGTGAGA	CCACACAAACAAACAATCAGTTC	3.85	-2.36	290
3L_19951572_19951625_FBgn0085287_-	CG34258	0.07	0.09	0.36	0.41	4.81	0.305	0.007704	0.02	0.03	0.35	0.42	15.4	0.36	0.009508	40.74	15.4	4.81	0.36	3L_19951572_19951625_FBgn0085287_-	CTCGTGAGT	TTACCACTATCGTCTAATAGGGA	8.41	7.99	53
3R_12062755_12062801_FBgn0037988_-	CG14740	0.01	0	0.37	0.36	73	0.36	0.000386	0.01	0.01	0.32	0.31	31.5	0.305	0.000269	29.79	73	31.5	0.36	3R_12062755_12062801_FBgn0037988_-	AAGGTAATT	CGTTGATTTTATTGTTTCAGAAC	8.83	8.82	46
3R_21878072_21878171_FBgn0053092_+	P5CDh2	0.07	0.09	0.32	0.32	4	0.24	0.001732	0.15	0.16	0.51	0.52	3.32	0.36	0.000386	38	4	3.32	0.36	3R_21878072_21878171_FBgn0053092_+	TTGGTAAGC	CATTTCGGGATTCATTACAGGGC	8.72	5.99	99
3R_21884846_21884902_FBgn0038915_-	CG17819	0.04	0.01	0.29	0.29	11.6	0.265	0.003189	0.02	0	0.34	0.4	37	0.36	0.007628	28.07	37	11.6	0.36	3R_21884846_21884902_FBgn0038915_-	CAGGTATAT	AACTTATACTATCTGGGTAGGAG	7.88	3.97	56
3R_30628667_30628723_FBgn0039792_-	CG2267	0.83	0.84	0.94	0.95	1.13	0.11	0.004107	0.03	0.03	0.38	0.4	13	0.36	0.000771	31.58	13	1.13	0.36	3R_30628667_30628723_FBgn0039792_-	CCAGTGGTT	GTATTATATATCCCTAATAGATG	-9.58	6	56
2L_10907951_10908012_FBgn0032314_-	CG7309	0.01	0	0.34	0.35	69	0.34	0.000432	0.01	0	0.34	0.38	72	0.355	0.003355	40.32	72	69	0.355	2L_10907951_10908012_FBgn0032314_-	ATCGTGAGT	TTTTATAATCCGCCTCCTAGCAA	8.88	5.03	61
2L_15957976_15958030_FBgn0028856_+	CG18063	0.01	0	0.36	0.36	72	0.355	0.000198	0.01	0	0.31	0.28	59	0.29	0.002959	27.27	72	59	0.355	2L_15957976_15958030_FBgn0028856_+	GTTGTAAGA	TAGTATTGTTTATGTTTTAGAAA	3.54	6.65	54
2L_22043194_22043246_FBgn0051601_-	CG31601	0.09	0.04	0.38	0.46	6.46	0.355	0.017201	0.09	0.04	0.38	0.43	6.23	0.34	0.010641	37.74	6.46	6.23	0.355	2L_22043194_22043246_FBgn0051601_-	AAGGTCTGT	AAAAACTTGATGTATTTTAGTGT	6.43	5.99	52
2R_11778841_11778904_FBgn0260007_+	CG42493	0.01	0.01	0.38	0.35	36.5	0.355	0.001781	0.01	0.01	0.35	0.34	34.5	0.335	0.000223	35.94	36.5	34.5	0.355	2R_11778841_11778904_FBgn0260007_+	TACGTGAGT	AAAAATCCTTCTAAACTCAGCAC	7.77	1.72	63
2R_12321651_12321711_FBgn0033712_+	mIF3	0.08	0.06	0.37	0.36	5.21	0.295	0.001433	0.12	0.04	0.45	0.42	5.44	0.355	0.014174	42.62	5.44	5.21	0.355	2R_12321651_12321711_FBgn0033712_+	CAAGTGGGT	GAAGTTGCTATACTTTGCAGACT	4.82	5.15	60
2R_14933597_14933666_FBgn0040747_+	CG12853	0.04	0.03	0.38	0.4	11.14	0.355	0.00099	0.05	0.04	0.37	0.38	8.33	0.33	0.000459	22.86	11.14	8.33	0.355	2R_14933597_14933666_FBgn0040747_+	GAAGTTAGT	TTTCCGGATTTTTCTTTTAGAAT	2.87	9.54	69
2R_16276537_16276589_FBgn0053017_+	CG33017	0.52	0.48	0.82	0.81	1.63	0.315	0.004256	0.5	0.48	0.86	0.83	1.72	0.355	0.002569	39.62	1.72	1.63	0.355	2R_16276537_16276589_FBgn0053017_+	ACAGCAAGT	ATTTTATTTGCAAGTTACAGGAT	1.74	-0.22	52
2R_22714012_22714087_FBgn0050268_+	CG30268	0.01	0.02	0.41	0.33	24.67	0.355	0.01265	0.04	0.09	0.46	0.35	6.23	0.34	0.030154	34.21	24.67	6.23	0.355	2R_22714012_22714087_FBgn0050268_+	AGGGTGAGT	ATAATCATTAATATTTCCAGAAC	9.25	4.66	75
2R_9100837_9100892_FBgn0033376_+	CG8777	0	0	0.17	0.2	NA	0.185	0.00651	0	0	0.33	0.38	NA	0.355	0.004923	26.79	0	0	0.355	2R_9100837_9100892_FBgn0033376_+	ACGGTGCCA	ATTTTTACCCCATTTAATAGACA	1.16	4.99	55
3L_12213298_12213353_FBgn0260941_-	app	0.58	0.68	1	0.97	1.56	0.355	0.020946	0.57	0.58	0.84	0.84	1.46	0.265	0.000356	46.43	1.56	1.46	0.355	3L_12213298_12213353_FBgn0260941_-	TAGGTAAGT	CTAATTGGATTAACCGGCAGACG	9.66	2.96	55
3L_152299_152340_FBgn0263988_-	Dic61B	0.06	0.09	0.47	0.36	5.53	0.34	0.026982	0.08	0.1	0.52	0.37	4.94	0.355	0.042549	30.95	5.53	4.94	0.355	3L_152299_152340_FBgn0263988_-	AAAGTAAGT	AATTTGCACTTCTTACATAGAAC	9.72	4.77	41
3L_17793871_17793937_FBgn0261998_-	CG42816	0.06	0.06	0.45	0.38	6.92	0.355	0.009581	0.04	0.03	0.34	0.39	10.43	0.33	0.005916	31.34	10.43	6.92	0.355	3L_17793871_17793937_FBgn0261998_-	CTGGTATAA	ATCTTCTAACCTCCTATTAGTTA	2.2	4.84	66
3L_3185423_3185480_FBgn0260026_+	CG42494	0.06	0.11	0.47	0.41	5.18	0.355	0.011885	0.06	0.12	0.46	0.4	4.78	0.34	0.015216	34.48	5.18	4.78	0.355	3L_3185423_3185480_FBgn0260026_+	CTGGTAACT	CACTTTTTAATAAACTTAAGCTT	5.45	2.53	57
3R_20107501_20107572_FBgn0051206_-	CG31206	0.01	0.01	0.36	0.37	36.5	0.355	0.000198	0.33	0.32	0.57	0.57	1.75	0.245	0.000416	41.67	36.5	1.75	0.355	3R_20107501_20107572_FBgn0051206_-	TCAGTAAGT	CACTCGAACAATCTTTCCAGTAA	9.14	3.22	71
3R_22546032_22546086_FBgn0038984_-	AdipoR	0.59	0.53	0.94	0.89	1.63	0.355	0.011885	0.6	0.56	0.9	0.94	1.59	0.34	0.006849	50.91	1.63	1.59	0.355	3R_22546032_22546086_FBgn0038984_-	TGAGTATGC	TCATTGCCTCGCACATTTAGTTC	1.94	6.11	54
2L_11791213_11791267_FBgn0032376_-	Tsp33B	0.01	0.01	0.28	0.3	29	0.28	0.001273	0.02	0.01	0.35	0.38	24.33	0.35	0.002035	43.64	29	24.33	0.35	2L_11791213_11791267_FBgn0032376_-	GTGGTGGGT	TAAATCAGTCCATTCCCCAGAAA	4.29	2.02	54
2L_13708896_13708948_FBgn0028848_+	CG7311	0.01	0.01	0.35	0.36	35.5	0.345	0.00021	0.01	0.01	0.35	0.37	36	0.35	0.000815	39.62	36	35.5	0.35	2L_13708896_13708948_FBgn0028848_+	AAGGTAGGT	TATGAAATATATATTCCAAGGTT	10.29	3.44	52
2L_14802972_14803022_FBgn0250834_+	CG33308	0.01	0	0.33	0.37	70	0.345	0.003552	0.01	0.01	0.35	0.37	36	0.35	0.000815	25.49	70	36	0.35	2L_14802972_14803022_FBgn0250834_+	AAGGTACGT	AAATAATAATCCCTATCAAGGAG	10.75	1.33	50
2L_20814919_20814985_FBgn0053322_-	CG33322	0.05	0.04	0.37	0.42	8.78	0.35	0.005264	0.06	0.04	0.36	0.42	7.8	0.34	0.00854	43.28	8.78	7.8	0.35	2L_20814919_20814985_FBgn0053322_-	AAGGTTTCT	CCTTTCAACTTTTTGCTTAGGTC	0.28	8.2	66
2L_22043467_22043536_FBgn0051601_-	CG31601	0.03	0.05	0.4	0.38	9.75	0.35	0.001629	0.04	0.06	0.39	0.38	7.7	0.335	0.001112	31.43	9.75	7.7	0.35	2L_22043467_22043536_FBgn0051601_-	TGGGTGACA	ATATTTGGTGCAAACCTTAGCCG	-1.36	0.87	69
2L_6802655_6802707_FBgn0031859_-	CG17377	0	0	0.36	0.34	NA	0.35	0.000815	0	0	0.28	0.27	NA	0.275	0.00033	35.85	0	0	0.35	2L_6802655_6802707_FBgn0031859_-	AGAGTAAGT	TTAAATCCTTTGTCCTGTAGCGC	9.35	7.73	52
2R_12395570_12395619_FBgn0050048_+	CG30048	0	0.05	0.44	0.31	15	0.35	0.037386	0	0.05	0.37	0.26	12.6	0.29	0.040765	42	15	12.6	0.35	2R_12395570_12395619_FBgn0050048_+	TAAGTGAGT	TCTATCCATCCTTTCCACAGCAC	6.43	9.25	49
2R_24123525_24123583_FBgn0264297_-	CG43775	0.1	0.09	0.43	0.44	4.58	0.34	0.000432	0.09	0.08	0.42	0.45	5.12	0.35	0.002035	62.71	5.12	4.58	0.35	2R_24123525_24123583_FBgn0264297_-	CAAGTGAGT	CGAACCCGCTGCTCCACCAGGTT	9.1	5.86	58
2R_24123525_24123583_FBgn0264298_-	CG43776	0.1	0.09	0.43	0.44	4.58	0.34	0.000432	0.09	0.08	0.42	0.45	5.12	0.35	0.002035	62.71	5.12	4.58	0.35	2R_24123525_24123583_FBgn0264298_-	CAAGTGAGT	CGAACCCGCTGCTCCACCAGGTT	9.1	5.86	58
2R_24123525_24123583_FBgn0264299_-	CG43777	0.1	0.09	0.43	0.44	4.58	0.34	0.000432	0.09	0.08	0.42	0.45	5.12	0.35	0.002035	62.71	5.12	4.58	0.35	2R_24123525_24123583_FBgn0264299_-	CAAGTGAGT	CGAACCCGCTGCTCCACCAGGTT	9.1	5.86	58
3L_1554011_1554077_FBgn0035231_+	Pcyt2	0.04	0.02	0.32	0.33	10.83	0.295	0.001433	0.06	0.03	0.39	0.4	8.78	0.35	0.002035	49.25	10.83	8.78	0.35	3L_1554011_1554077_FBgn0035231_+	TTTGTAAGG	CTACCCCAAAACGCCTCCAGAGC	3.89	3.35	66
3L_1616763_1616819_FBgn0035240_+	CG33791	0.37	0.4	0.65	0.73	1.79	0.305	0.019059	0.43	0.45	0.76	0.82	1.8	0.35	0.008065	47.37	1.8	1.79	0.35	3L_1616763_1616819_FBgn0035240_+	CAGGTAAGG	GTCTCCATCTGCGTCTATAGCTC	11.08	7.22	56
3R_24876000_24876246_FBgn0039240_-	CG3744	0.73	0.61	1.02	1.02	1.52	0.35	0.028153	0.59	0.68	0.9	0.89	1.41	0.26	0.029012	52.63	1.52	1.41	0.35	3R_24876000_24876246_FBgn0039240_-	TCGGTGGGT	CGAATTGGGTCAATTCGCAGAAA	6.9	3.99	246
3R_26568671_26573423_FBgn0263289_+	scrib	0.2	0.2	0.6	0.5	2.75	0.35	0.019804	0.4	0.38	0.67	0.6	1.63	0.245	0.021369	41.64	2.75	1.63	0.35	3R_26568671_26573423_FBgn0263289_+	AACGTATAT	TGCAGTCAAATAAAAAATAGGTT	-2.43	1.68	4752
4_222599_222653_FBgn0051999_-	CG31999	0	0	0.3	0.3	NA	0.3	0	0	0	0.37	0.33	NA	0.35	0.003249	27.27	0	0	0.35	4_222599_222653_FBgn0051999_-	ACGGTATAT	ACAACCTGTATTCTATATAGCGC	6.07	6.77	54
X_2330356_2330412_FBgn0053218_+	CR33218	0	0	0.33	0.29	NA	0.31	0.004137	0.02	0.02	0.39	0.35	18.5	0.35	0.003249	43.86	18.5	18.5	0.35	X_2330356_2330412_FBgn0053218_+	CAGGTGAGT	ATCCATCGTCTCTCCAATAGAGC	10.67	6.35	56
2L_11646446_11646557_FBgn0032369_-	CG6614	0.01	0.01	0.12	0.17	14.5	0.135	0.032625	0.2	0.21	0.58	0.52	2.68	0.345	0.007682	33.93	14.5	2.68	0.345	2L_11646446_11646557_FBgn0032369_-	TACGTGAGT	ATTTTACTTCTATAGCGCAGTCT	7.77	0.72	111
2L_1183472_1183528_FBgn0031320_-	CG5126	0.12	0.14	0.38	0.43	3.12	0.275	0.009451	0.07	0.11	0.47	0.4	4.83	0.345	0.013379	42.11	4.83	3.12	0.345	2L_1183472_1183528_FBgn0031320_-	AAGGTGCGC	GAATGTTTACTTTTCTGCAGGTT	9.05	8.46	56
2L_4434057_4434114_FBgn0085206_+	CG34177	0.13	0.16	0.47	0.47	3.24	0.325	0.002123	0.11	0.15	0.47	0.48	3.65	0.345	0.003552	53.45	3.65	3.24	0.345	2L_4434057_4434114_FBgn0085206_+	CGAGTGAGT	GCTTCAATTTCCATCCGCAGACC	8.49	10.47	57
2L_4434057_4434114_FBgn0085207_+	CG34178	0.13	0.16	0.47	0.47	3.24	0.325	0.002123	0.11	0.15	0.47	0.48	3.65	0.345	0.003552	53.45	3.65	3.24	0.345	2L_4434057_4434114_FBgn0085207_+	CGAGTGAGT	GCTTCAATTTCCATCCGCAGACC	8.49	10.47	57
2R_12641984_12642039_FBgn0033760_-	CG8785	0	0	0.29	0.38	NA	0.335	0.01757	0	0	0.29	0.4	NA	0.345	0.024485	35.71	0	0	0.345	2R_12641984_12642039_FBgn0033760_-	CAAGTGAGT	ATCTATTTAAAAATCTCCAGGCA	9.1	5.07	55
2R_22933319_22933383_FBgn0034800_-	CG3788	0.03	0.02	0.37	0.37	14.8	0.345	0.00021	0.03	0.03	0.33	0.33	11	0.3	0	46.15	14.8	11	0.345	2R_22933319_22933383_FBgn0034800_-	AGGGTGACT	ACACAGACCGCATCCCATAGCCA	2.76	0.98	64
3R_25593532_25593585_FBgn0261287_-	ymp	0.01	0	0.34	0.33	67	0.33	0.000459	0.01	0.01	0.36	0.35	35.5	0.345	0.00021	50	67	35.5	0.345	3R_25593532_25593585_FBgn0261287_-	AAGGTGAGT	CAAACCATTCTGCCTAACAGTTC	10.47	5.68	53
X_12091493_12091569_FBgn0040859_+	CR32658	0.73	0.71	0.83	0.85	1.17	0.12	0.013606	0.09	0.08	0.4	0.46	5.06	0.345	0.007682	35.06	5.06	1.17	0.345	X_12091493_12091569_FBgn0040859_+	TTGGTAAGT	GAATATACAGATTCTTGTAGATA	10.47	-1.34	76
X_12091519_12091569_FBgn0040859_+	CR32658	0.03	0.02	0.36	0.36	14.4	0.335	0.000223	0.09	0.08	0.4	0.46	5.06	0.345	0.007682	33.33	14.4	5.06	0.345	X_12091519_12091569_FBgn0040859_+	CTTGTAAGC	GAATATACAGATTCTTGTAGATA	4.33	-1.34	50
X_15294267_15294336_FBgn0030625_+	CG5877	0.03	0.02	0.35	0.39	14.8	0.345	0.003552	0.01	0.01	0.21	0.22	21.5	0.205	0.000594	22.86	21.5	14.8	0.345	X_15294267_15294336_FBgn0030625_+	ATTGTATGT	CACGATATTCTTTTATTCAGGTT	4.34	7.87	69
X_476293_476393_FBgn0266572_-	ebo	0.06	0.03	0.35	0.43	8.67	0.345	0.014989	0.07	0.03	0.33	0.4	7.3	0.315	0.015985	57.43	8.67	7.3	0.345	X_476293_476393_FBgn0266572_-	ATGGTGAGG	CCCACCCACTGTCTGTGCAGCAC	7.61	8.18	100
2L_7476712_7476773_FBgn0031920_+	CG6441	0.03	0.01	0.33	0.39	18	0.34	0.00854	0.03	0.01	0.29	0.39	17	0.32	0.024463	29.03	18	17	0.34	2L_7476712_7476773_FBgn0031920_+	CGGGTAAAC	ATATATATACTCCATTGTAGCGC	4.58	6.33	61
2R_13210408_13210458_FBgn0050058_-	CG30058	0.02	0.02	0.33	0.37	17.5	0.33	0.003653	0.02	0.02	0.34	0.38	18	0.34	0.003442	31.37	18	17.5	0.34	2R_13210408_13210458_FBgn0050058_-	AGTGTATGT	GAATATAAAGTGTCGCACAGATC	4.8	-1.76	50
2R_13210408_13210458_FBgn0085264_-	CG34235	0.02	0.02	0.33	0.37	17.5	0.33	0.003653	0.02	0.02	0.34	0.38	18	0.34	0.003442	31.37	18	17.5	0.34	2R_13210408_13210458_FBgn0085264_-	AGTGTATGT	GAATATAAAGTGTCGCACAGATC	4.8	-1.76	50
2R_13210408_13210458_FBgn0085341_-	CG34312	0.02	0.02	0.33	0.37	17.5	0.33	0.003653	0.02	0.02	0.34	0.38	18	0.34	0.003442	31.37	18	17.5	0.34	2R_13210408_13210458_FBgn0085341_-	AGTGTATGT	GAATATAAAGTGTCGCACAGATC	4.8	-1.76	50
3L_11606472_11606535_FBgn0036180_-	Duba	0.14	0.12	0.47	0.46	3.58	0.335	0.001112	0.14	0.12	0.47	0.47	3.62	0.34	0.000864	50	3.62	3.58	0.34	3L_11606472_11606535_FBgn0036180_-	GAGGTTGGT	AGTTCCTTCCTACCTTGCAGCGC	6.36	9.3	63
3L_152273_152340_FBgn0263988_-	Dic61B	0.06	0.09	0.47	0.36	5.53	0.34	0.026982	0.11	0.15	0.33	0.41	2.85	0.24	0.033012	39.71	5.53	2.85	0.34	3L_152273_152340_FBgn0263988_-	AAAGTAAGT	GTTCCCCACGCGTCAAAAAGCGG	9.72	0.47	67
3L_300774_300894_FBgn0264707_+	RhoGEF3	0.25	0.22	0.55	0.6	2.45	0.34	0.007273	0.15	0.16	0.46	0.44	2.9	0.295	0.001433	45.45	2.9	2.45	0.34	3L_300774_300894_FBgn0264707_+	AAGGCGAGT	TTATTTTATCTTATTTACAGTCA	2.72	7.79	120
3L_7467658_7467723_FBgn0035786_+	Tsp66A	0.5	0.5	0.86	0.82	1.68	0.34	0.003442	0.47	0.47	0.69	0.66	1.44	0.205	0.005311	24.24	1.68	1.44	0.34	3L_7467658_7467723_FBgn0035786_+	ATTGTAATT	ATTGTATTTAAATTTTACAGTAT	-0.94	5.31	65
3L_7467658_7467723_FBgn0261536_+	CG42660	0.5	0.5	0.86	0.82	1.68	0.34	0.003442	0.47	0.47	0.69	0.66	1.44	0.205	0.005311	24.24	1.68	1.44	0.34	3L_7467658_7467723_FBgn0261536_+	ATTGTAATT	ATTGTATTTAAATTTTACAGTAT	-0.94	5.31	65
3L_7467658_7467723_FBgn0261537_+	CG42661	0.5	0.5	0.86	0.82	1.68	0.34	0.003442	0.47	0.47	0.69	0.66	1.44	0.205	0.005311	24.24	1.68	1.44	0.34	3L_7467658_7467723_FBgn0261537_+	ATTGTAATT	ATTGTATTTAAATTTTACAGTAT	-0.94	5.31	65
3R_19841667_19841726_FBgn0051459_+	CG31459	0.01	0.01	0.35	0.32	33.5	0.325	0.002123	0.02	0.02	0.35	0.37	18	0.34	0.000864	36.67	33.5	18	0.34	3R_19841667_19841726_FBgn0051459_+	AAGGTATGA	GTGTCTGTTACGACCCTTAGCTT	9.11	3.88	59
3R_6641566_6641621_FBgn0051286_+	CG31286	0.44	0.42	0.78	0.72	1.74	0.32	0.009625	0.42	0.41	0.78	0.73	1.82	0.34	0.005576	48.21	1.82	1.74	0.34	3R_6641566_6641621_FBgn0051286_+	TGGGTATGA	TAAGAGGTTGAACTACACAGAAA	5.85	-1.81	55
3R_8563330_8563408_FBgn0265318_-	CR44291	1.13	1.18	1.55	1.44	1.29	0.34	0.030154	0.4	0.46	0.65	0.59	1.44	0.19	0.046417	39.24	1.44	1.29	0.34	3R_8563330_8563408_FBgn0265318_-	TAGGTATTC	TCCGCCCTTTCTCGTCGTAGGAG	4.57	9.37	78
X_15334675_15334989_FBgn0026428_+	HDAC6	0.21	0.2	0.59	0.5	2.66	0.34	0.017275	0.06	0.08	0.2	0.23	3.07	0.145	0.015108	43.81	3.07	2.66	0.34	X_15334675_15334989_FBgn0026428_+	CAGGTTTTA	ATTTAAATTCGTTTTCGCAGAGC	0.68	8.1	314
X_20672047_20672119_FBgn0031128_-	hydra	0.01	0.01	0.35	0.35	35	0.34	0	0.06	0.06	0.29	0.3	4.92	0.235	0.000452	35.62	35	4.92	0.34	X_20672047_20672119_FBgn0031128_-	CAGGTGTGT	CTTAATAATCCGGAAAGCAGAAA	6.99	-3.06	72
X_6362836_6362900_FBgn0016974_-	swaPsi	0	0	0.32	0.36	NA	0.34	0.003442	0	0	0.24	0.25	NA	0.245	0.000416	44.62	0	0	0.34	X_6362836_6362900_FBgn0016974_-	TGGGTACTT	ATCCTTTCTTCTTCAACCAGGTG	3.47	9.92	64
2L_11532180_11532235_FBgn0085191_+	CG34162	0.16	0.14	0.53	0.44	3.23	0.335	0.018414	0.09	0.17	0.48	0.44	3.54	0.33	0.017875	32.14	3.54	3.23	0.335	2L_11532180_11532235_FBgn0085191_+	CTTGTGGGT	TTAGTTTAAGCCACTTTTAGTTT	0.56	-1.39	55
2L_12713376_12713442_FBgn0032455_-	Pih1D1	0.02	0.02	0.29	0.29	14.5	0.27	0	0.05	0.04	0.37	0.39	8.44	0.335	0.001112	37.31	14.5	8.44	0.335	2L_12713376_12713442_FBgn0032455_-	AAGGTGATG	TCTTTCTTCCCATTTTTCAGATG	5.22	11.41	66
2L_2061908_2061974_FBgn0053516_-	dpr3	0.02	0	0.21	0.25	23	0.22	0.010173	0	0.02	0.32	0.37	34.5	0.335	0.006398	55.22	34.5	23	0.335	2L_2061908_2061974_FBgn0053516_-	CAGGTGGGT	CGCTGCTTAATCCTCCGCAGGCT	8.56	8.68	66
2R_14669924_14669982_FBgn0033955_+	CG12866	0.01	0	0.38	0.3	68	0.335	0.014173	0.24	0.17	0.48	0.46	2.29	0.265	0.01835	40.68	68	2.29	0.335	2R_14669924_14669982_FBgn0033955_+	TTGGTAGGT	AATAGTACTAGCCTGCGCAGGTG	7.03	-1.48	58
3L_1540958_1541655_FBgn0035229_+	pns	0.55	0.62	0.92	0.92	1.57	0.335	0.01074	0.12	0.1	0.39	0.35	3.36	0.26	0.007315	45.56	3.36	1.57	0.335	3L_1540958_1541655_FBgn0035229_+	GAGGTAGTT	CGCATCCGAATCCCAAACAGAGG	5.77	4.07	697
3L_19879955_19880010_FBgn0036913_+	Usp32	0.01	0.01	0.37	0.32	34.5	0.335	0.005523	0.01	0.02	0.31	0.36	22.33	0.32	0.006288	33.93	34.5	22.33	0.335	3L_19879955_19880010_FBgn0036913_+	CGTGTATGT	TTATATTTGTAATTGTTTAGCTG	5.08	5.4	55
3L_23339370_23339429_FBgn0052230_+	ND-MLRQ	0.18	0.16	0.5	0.51	2.97	0.335	0.001112	0.14	0.13	0.28	0.31	2.19	0.16	0.009625	16.67	2.97	2.19	0.335	3L_23339370_23339429_FBgn0052230_+	TAGGTAATT	ACATTTTAATTATAACGTAGACA	7.27	4.5	59
3R_19376759_19376824_FBgn0051245_-	CG31245	0.08	0.06	0.41	0.4	5.79	0.335	0.001112	0.1	0.09	0.4	0.4	4.21	0.305	0.000269	37.88	5.79	4.21	0.335	3R_19376759_19376824_FBgn0051245_-	TAGGTAAAA	ATAACTCGATCCTTTCTTAGCAA	6.02	4.23	65
3R_5370424_5370485_FBgn0051542_+	CG31542	0.03	0.03	0.34	0.34	11.33	0.31	0	0.05	0.04	0.39	0.37	8.44	0.335	0.001112	43.55	11.33	8.44	0.335	3R_5370424_5370485_FBgn0051542_+	TGGGTAAAG	CAGCGTCTCCTTCCGGACAGGGA	4.2	6.98	61
3R_5370424_5370485_FBgn0085306_+	CG34277	0.03	0.03	0.34	0.34	11.33	0.31	0	0.05	0.04	0.39	0.37	8.44	0.335	0.001112	43.55	11.33	8.44	0.335	3R_5370424_5370485_FBgn0085306_+	TGGGTAAAG	CAGCGTCTCCTTCCGGACAGGGA	4.2	6.98	61
3R_5622689_5622747_FBgn0037350_-	CG2911	0.25	0.33	0.6	0.65	2.16	0.335	0.019255	0.07	0.11	0.35	0.35	3.89	0.26	0.005865	28.81	3.89	2.16	0.335	3R_5622689_5622747_FBgn0037350_-	AACGTAAGT	CACGAATATCCCTTTTCCAGATG	10.74	8.15	58
X_21102052_21102130_FBgn0031155_-	CG15446	0.56	0.58	0.91	0.9	1.59	0.335	0.001112	0.65	0.7	0.98	0.93	1.41	0.28	0.015572	29.11	1.59	1.41	0.335	X_21102052_21102130_FBgn0031155_-	CTGGTTTGT	TCGGATCGTTACAACAATAGGCG	4.29	2.33	78
2L_14875698_14875756_FBgn0032554_-	CG15278	0.1	0.11	0.34	0.42	3.62	0.275	0.020819	0.09	0.09	0.37	0.47	4.67	0.33	0.022195	42.37	4.67	3.62	0.33	2L_14875698_14875756_FBgn0032554_-	CCCGTAAGA	CTTCTTCGATTTCATTGCAGCGC	5.66	8.85	58
2R_13507659_13507714_FBgn0024556_+	mEFTu1	0.15	0.07	0.4	0.48	4	0.33	0.02815	0.13	0.07	0.31	0.39	3.5	0.25	0.03775	44.64	4	3.5	0.33	2R_13507659_13507714_FBgn0024556_+	CTCGTAAGT	ATTCTAATCCACACATTTAGTTA	9.63	2.7	55
2R_19947251_19947323_FBgn0050447_+	CG30447	0.02	0.02	0.36	0.34	17.5	0.33	0.000917	0.04	0.03	0.26	0.24	7.14	0.215	0.002693	23.29	17.5	7.14	0.33	2R_19947251_19947323_FBgn0050447_+	AAGGTATAT	TATTATTTTCCTTCTGAAAGTAA	7.84	3.59	72
2R_22710273_22710322_FBgn0050275_+	CG30275	0.07	0.04	0.38	0.39	7	0.33	0.002288	0.06	0.04	0.33	0.34	6.7	0.285	0.001535	28	7	6.7	0.33	2R_22710273_22710322_FBgn0050275_+	GACGTAAGT	TTGATAAAATTACTCTTTAGGGC	10.93	6.56	49
3L_150297_150348_FBgn0263988_-	Dic61B	0.08	0.08	0.48	0.34	5.12	0.33	0.04217	0.07	0.06	0.36	0.27	4.85	0.25	0.03127	44.23	5.12	4.85	0.33	3L_150297_150348_FBgn0263988_-	TTGGTAGGA	AGATAGTATCTATTCTGCAGGTT	5	4.21	51
3L_16566933_16567051_FBgn0262842_+	CG43206	0.06	0.05	0.37	0.4	7	0.33	0.002288	0.06	0.04	0.33	0.35	6.8	0.29	0.00237	46.22	7	6.8	0.33	3L_16566933_16567051_FBgn0262842_+	CTTGTAAGT	ACATTTTCTTATGTTCACAGCGC	8	9.13	118
3L_17556420_17556495_FBgn0025455_-	CycT	0.06	0.06	0.45	0.33	6.5	0.33	0.031504	0.05	0.06	0.35	0.29	5.82	0.265	0.012917	47.37	6.5	5.82	0.33	3L_17556420_17556495_FBgn0025455_-	AAGGTATGC	ATTACTGTGGTATATTTTAGCAT	9.55	7.11	75
3L_22879431_22879483_FBgn0037202_+	Ssl1	0.09	0.14	0.49	0.4	3.87	0.33	0.023481	0.19	0.19	0.31	0.3	1.61	0.115	0.001885	45.28	3.87	1.61	0.33	3L_22879431_22879483_FBgn0037202_+	ATGGTGCGA	CTTACTTTTAATCCTATTAGGGA	4.84	6.84	52
3L_2774487_2774567_FBgn0044452_+	Atg2	0.3	0.3	0.62	0.62	2.07	0.32	0	0.05	0.07	0.33	0.45	6.5	0.33	0.032337	45.68	6.5	2.07	0.33	3L_2774487_2774567_FBgn0044452_+	AATGTGAGT	TTCCGTGATTCGCCACCCAGAAA	7.8	4.76	80
3R_13188887_13188950_FBgn0038124_+	CG14380	0.54	0.56	0.89	0.87	1.6	0.33	0.001832	0.43	0.44	0.71	0.75	1.68	0.295	0.004848	42.19	1.68	1.6	0.33	3R_13188887_13188950_FBgn0038124_+	GTGGTGGGT	TAAATATCCCATTTTTGCAGCTG	4.29	7.98	63
3R_15370264_15370318_FBgn0038332_-	CG6136	0.02	0.03	0.36	0.35	14.2	0.33	0.000459	0.02	0.03	0.37	0.33	14	0.325	0.004	32.73	14.2	14	0.33	3R_15370264_15370318_FBgn0038332_-	AAGGTAGGT	AAATCCAAGTATATCCCAAGTGA	10.29	-5.26	54
3R_16430942_16430997_FBgn0051279_+	CG31279	0	0.05	0.3	0.41	14.2	0.33	0.031921	0.01	0.04	0.26	0.35	12.2	0.28	0.02752	44.64	14.2	12.2	0.33	3R_16430942_16430997_FBgn0051279_+	TCGGTGAGC	TGAGAATCAGATCCCAACAGATC	9.1	-1.62	55
3R_17391886_17391959_FBgn0265043_-	CR44160	0.72	0.71	0.83	0.84	1.17	0.12	0.003454	0.84	0.86	1.19	1.17	1.39	0.33	0.001832	39.19	1.39	1.17	0.33	3R_17391886_17391959_FBgn0265043_-	CTGGTTCGT	TTCTTTTTTTTTAATTCAAGTTG	5.4	5.86	73
3R_17606330_17606377_FBgn0038524_+	sll	0.07	0.02	0.43	0.32	8.33	0.33	0.031921	0.07	0.05	0.38	0.32	5.83	0.29	0.011683	39.58	8.33	5.83	0.33	3R_17606330_17606377_FBgn0038524_+	ATGGTAATT	GCGAATCATGCAAAAACTAGTTT	6.49	-1.73	47
3R_17606330_17606384_FBgn0038524_+	sll	0.07	0.02	0.43	0.32	8.33	0.33	0.031921	0.21	0.21	0.52	0.42	2.24	0.26	0.035049	38.18	8.33	2.24	0.33	3R_17606330_17606384_FBgn0038524_+	ATGGTAATT	ATGCAAAAACTAGTTTTCAGAGC	6.49	-2.97	54
3R_24280011_24280069_FBgn0039177_+	CG13611	0.03	0.02	0.39	0.32	14.2	0.33	0.011284	0.02	0.02	0.36	0.33	17.25	0.325	0.002123	35.59	17.25	14.2	0.33	3R_24280011_24280069_FBgn0039177_+	CAAGTGGGT	GCTTATGACTCATTTTCTAGTCT	4.82	5.88	58
3R_24532602_24532678_FBgn0262167_+	ana1	0.14	0.07	0.39	0.48	4.14	0.33	0.028571	0.17	0.1	0.36	0.43	2.93	0.26	0.034384	28.57	4.14	2.93	0.33	3R_24532602_24532678_FBgn0262167_+	GAGGTAGTA	TCAATAACGTATTTCAATAGGAA	4.45	6.55	76
X_11919453_11919524_FBgn0262687_-	CR43157	0.01	0	0.33	0.34	67	0.33	0.000459	0.01	0	0.26	0.27	53	0.26	0.000739	31.94	67	53	0.33	X_11919453_11919524_FBgn0262687_-	TTGGTAAGC	TACAACATTTGTATTTCTAGAGT	8.72	6.52	71
2L_18378853_18378905_FBgn0085200_+	CG34171	0.08	0.04	0.33	0.29	5.17	0.25	0.012559	0.08	0.02	0.41	0.34	7.5	0.325	0.019531	26.42	7.5	5.17	0.325	2L_18378853_18378905_FBgn0085200_+	AGAGTGGGT	ATTTTCGAATCTATAATTAGTAA	1.31	3.01	52
2R_10027644_10027707_FBgn0033473_+	CG12128	0.06	0.09	0.38	0.42	5.33	0.325	0.005865	0.26	0.25	0.39	0.34	1.43	0.11	0.049745	42.19	5.33	1.43	0.325	2R_10027644_10027707_FBgn0033473_+	GTGGTAGGC	TGAACTATTCGTCCTAACAGAGA	5.59	7.51	63
2R_23138925_23138982_FBgn0050192_+	CG30192	0.01	0	0.28	0.29	57	0.28	0.000637	0.01	0.01	0.32	0.35	33.5	0.325	0.002123	36.21	57	33.5	0.325	2R_23138925_23138982_FBgn0050192_+	TTGGTGAGA	ATATACTAATTTCTCCGCAGTCG	6.29	7.4	57
2R_5254466_5254520_FBgn0084008_+	CR41443	0.4	0.42	0.75	0.72	1.79	0.325	0.003063	0.43	0.47	0.76	0.79	1.72	0.325	0.005865	40	1.79	1.72	0.325	2R_5254466_5254520_FBgn0084008_+	CAAGTAAGT	ACGAAGACAGCATTTGGAAGTTG	10.08	-10.76	54
2R_5254466_5254528_FBgn0084008_+	CR41443	0.4	0.42	0.75	0.72	1.79	0.325	0.003063	0.82	0.83	0.93	0.93	1.13	0.105	0.00226	39.68	1.79	1.13	0.325	2R_5254466_5254528_FBgn0084008_+	CAAGTAAGT	AGCATTTGGAAGTTGTTCAGGAG	10.08	-4.41	62
2R_6673818_6673873_FBgn0033088_+	PGAP3	0.03	0.04	0.28	0.32	8.57	0.265	0.005998	0.04	0.04	0.31	0.42	9.12	0.325	0.027465	42.86	9.12	8.57	0.325	2R_6673818_6673873_FBgn0033088_+	CAGGTGAGA	GAGCAAGCTTCCATTGGCAGATG	9.22	3.25	55
2R_9896105_9896167_FBgn0050007_+	--	0	0	0.34	0.25	NA	0.295	0.022487	0.02	0	0.38	0.29	33.5	0.325	0.019531	30.16	33.5	33.5	0.325	2R_9896105_9896167_FBgn0050007_+	AAGGTAAGC	CCAAATCTCATTTCAAATAGGAT	10.22	6.19	62
3L_17760661_17760720_FBgn0052181_+	CG32181	0.03	0.02	0.29	0.33	12.4	0.285	0.005192	0.04	0.04	0.33	0.4	9.12	0.325	0.0114	20	12.4	9.12	0.325	3L_17760661_17760720_FBgn0052181_+	CCGGTATGT	TTAAATACTTATACCGAAAGTGC	9.2	-0.28	59
3L_18299014_18299073_FBgn0036785_-	CG13700	0.01	0.01	0.29	0.38	33.5	0.325	0.018637	0.01	0.01	0.21	0.31	26	0.25	0.03775	28.33	33.5	26	0.325	3L_18299014_18299073_FBgn0036785_-	GAGGTAAGA	TTTGTTTTTACCTGCGTCAGTTA	10.06	2.99	59
3L_6984280_6984342_FBgn0250849_-	CG32388	0.01	0.01	0.33	0.34	33.5	0.325	0.000237	0.01	0.01	0.31	0.32	31.5	0.305	0.000269	30.16	33.5	31.5	0.325	3L_6984280_6984342_FBgn0250849_-	GAAGTGGGT	TTTTATTTTTTTTTGCAAAGCTG	2.85	5.83	62
3L_6984280_6984342_FBgn0263387_-	CG43439	0.01	0.01	0.33	0.34	33.5	0.325	0.000237	0.01	0.01	0.31	0.32	31.5	0.305	0.000269	30.16	33.5	31.5	0.325	3L_6984280_6984342_FBgn0263387_-	GAAGTGGGT	TTTTATTTTTTTTTGCAAAGCTG	2.85	5.83	62
3L_8908935_8908987_FBgn0266757_-	mfr	0.03	0.04	0.31	0.4	10.14	0.32	0.019438	0.04	0.02	0.33	0.38	11.83	0.325	0.006794	41.51	11.83	10.14	0.325	3L_8908935_8908987_FBgn0266757_-	GTTGTAAGT	CTATATAGTACCCCGATCAGAGT	8.3	-1.44	52
3R_12387638_12387704_FBgn0053098_+	CG33098	0.09	0.16	0.5	0.4	3.6	0.325	0.033504	0.12	0.15	0.5	0.42	3.41	0.325	0.016843	40.3	3.6	3.41	0.325	3R_12387638_12387704_FBgn0053098_+	CGAGTGAGT	CAATACAATTTTCAATACAGCGT	8.49	3.96	66
3R_14327184_14327252_FBgn0038224_+	ATPsynE	0.49	0.62	0.86	0.9	1.59	0.325	0.041106	0.08	0.08	0.17	0.18	2.19	0.095	0.002759	44.93	2.19	1.59	0.325	3R_14327184_14327252_FBgn0038224_+	TCTGTAAAG	AGTACATCCTTTTCTTGCAGTTC	-3.75	7.49	68
3R_24188608_24188669_FBgn0039163_-	CG5515	0.48	0.51	0.75	0.89	1.66	0.325	0.045253	0.42	0.4	0.54	0.6	1.39	0.16	0.036913	41.94	1.66	1.39	0.325	3R_24188608_24188669_FBgn0039163_-	GCTGTAAGT	GTTTGTTGAAATTGTTAAAGCTA	8.56	2.36	61
X_1709776_1709840_FBgn0025378_-	CG3795	0.49	0.44	0.75	0.73	1.59	0.275	0.009451	0.54	0.44	0.86	0.77	1.66	0.325	0.04027	55.38	1.66	1.59	0.325	X_1709776_1709840_FBgn0025378_-	CAAGTGAGT	TGATCAGTGGACTCCACCAGTCG	9.1	-0.84	64
2L_1177862_1177947_FBgn0031319_+	CG4896	0.63	0.64	0.83	0.87	1.34	0.215	0.009069	0.64	0.58	0.91	0.95	1.52	0.32	0.012459	39.53	1.52	1.34	0.32	2L_1177862_1177947_FBgn0031319_+	CAAGTAAGA	TTACAATCGATTCGCATTAGATA	7.61	2.48	85
2L_1177869_1177947_FBgn0031319_+	CG4896	0.56	0.62	0.79	0.84	1.38	0.225	0.028827	0.64	0.58	0.91	0.95	1.52	0.32	0.012459	40.51	1.52	1.38	0.32	2L_1177869_1177947_FBgn0031319_+	GATGTGCGC	TTACAATCGATTCGCATTAGATA	1.75	2.48	78
2L_18672287_18672339_FBgn0263078_-	CG43339	0.02	0.02	0.32	0.36	17	0.32	0.003884	0.02	0.02	0.34	0.27	15.25	0.285	0.014749	20.75	17	15.25	0.32	2L_18672287_18672339_FBgn0263078_-	GTTGTGAGT	TCTTTTGTACATTTTCATAGTGA	6.59	6.02	52
2L_22105068_22105115_FBgn0040519_-	CG15219	0.01	0.01	0.16	0.16	16	0.15	0	0.01	0.01	0.34	0.32	33	0.32	0.000975	29.17	33	16	0.32	2L_22105068_22105115_FBgn0040519_-	TTAGTATGT	ATTCGTGTAGCTCTTTTTAGCTC	2.85	2.16	47
2R_12051555_12051606_FBgn0050039_-	CG30039	0.01	0	0.31	0.34	65	0.32	0.002433	0.01	0	0.28	0.3	58	0.285	0.001535	38.46	65	58	0.32	2R_12051555_12051606_FBgn0050039_-	CCGGTGAGT	AATTTCACGCAATTGAATAGCTT	10.9	-0.2	51
2R_17565325_17565387_FBgn0034242_+	CG14480	0.01	0.01	0.34	0.32	33	0.32	0.000975	0.08	0.08	0.34	0.34	4.25	0.26	0	42.86	33	4.25	0.32	2R_17565325_17565387_FBgn0034242_+	AAGGTGGGT	CGAACTTCCGCAACCCTCAGAAA	8.23	5.18	62
2R_23599695_23599756_FBgn0260761_-	CG42559	0.04	0.02	0.32	0.38	11.67	0.32	0.009625	0.02	0.02	0.31	0.36	16.75	0.315	0.00624	27.42	16.75	11.67	0.32	2R_23599695_23599756_FBgn0260761_-	CTGGTTGGT	TTAATTGCAAATTTACCCAGCAA	4.67	1.56	61
2R_23599695_23599756_FBgn0260762_-	CG42560	0.04	0.02	0.32	0.38	11.67	0.32	0.009625	0.02	0.02	0.31	0.36	16.75	0.315	0.00624	27.42	16.75	11.67	0.32	2R_23599695_23599756_FBgn0260762_-	CTGGTTGGT	TTAATTGCAAATTTACCCAGCAA	4.67	1.56	61
2R_6600625_6600683_FBgn0033076_-	CG15233	0.1	0.08	0.42	0.4	4.56	0.32	0.001947	0.07	0.06	0.37	0.29	5.08	0.265	0.022366	44.07	5.08	4.56	0.32	2R_6600625_6600683_FBgn0033076_-	TAAGTTCAG	TCAATACTTTCCTCCTGCAGGTT	-14.84	11.37	58
2R_8157718_8157759_FBgn0264877_+	CR44068	0.33	0.36	0.51	0.58	1.58	0.2	0.034391	0.36	0.36	0.69	0.67	1.89	0.32	0.000975	35.71	1.89	1.58	0.32	2R_8157718_8157759_FBgn0264877_+	GAGGTAAGC	ATTTTTAAATGCAAATGTAGACT	9.85	2.41	41
3L_17244048_17244109_FBgn0036703_+	CG7707	0.04	0.05	0.32	0.41	8.11	0.32	0.019438	0.05	0.06	0.33	0.42	6.82	0.32	0.019438	48.39	8.11	6.82	0.32	3L_17244048_17244109_FBgn0036703_+	CGAGTGAGT	CTGTGCACATATCTCTGCAGCAA	8.49	7.88	61
3L_19494422_19494819_FBgn0036875_-	CG9449	0.06	0.07	0.38	0.39	5.92	0.32	0.000488	0.06	0.08	0.33	0.24	4.07	0.215	0.043026	47.99	5.92	4.07	0.32	3L_19494422_19494819_FBgn0036875_-	AATGTGAGT	GCAATAAATCAACGCTGCAGAAT	7.8	1.57	397
3L_2490848_2490979_FBgn0035346_+	CG1146	0.27	0.26	0.59	0.58	2.21	0.32	0.000488	0.21	0.19	0.51	0.52	2.57	0.315	0.001257	34.09	2.57	2.21	0.32	3L_2490848_2490979_FBgn0035346_+	TAAGTAAAT	TTTAACCAATCCCCTTGCAGAGT	1.48	9.94	131
3L_300849_300894_FBgn0264707_+	RhoGEF3	0.58	0.63	0.95	0.9	1.53	0.32	0.011988	0.15	0.16	0.46	0.44	2.9	0.295	0.001433	36.96	2.9	1.53	0.32	3L_300849_300894_FBgn0264707_+	TCCGTATGC	TTATTTTATCTTATTTACAGTCA	1.9	7.79	45
3L_3962670_3962750_FBgn0035481_-	CG12605	0.01	0	0.33	0.32	65	0.32	0.000488	0.01	0.01	0.33	0.31	32	0.31	0.001039	43.21	65	32	0.32	3L_3962670_3962750_FBgn0035481_-	CATGTAAAT	CGCCTTTCCATTACTTGCAGAAA	2.07	9.27	80
3R_20016758_20016821_FBgn0038762_+	--	0.04	0.03	0.35	0.36	10.14	0.32	0.000488	0.04	0.03	0.32	0.33	9.29	0.29	0.000594	46.88	10.14	9.29	0.32	3R_20016758_20016821_FBgn0038762_+	ATGGTGCGT	TCAATCATCCTGTTCCCAAGACA	8.27	2.8	63
3R_20016758_20016825_FBgn0038762_+	--	0.04	0.03	0.35	0.36	10.14	0.32	0.000488	0.09	0.09	0.35	0.36	3.94	0.265	0.000356	47.06	10.14	3.94	0.32	3R_20016758_20016825_FBgn0038762_+	ATGGTGCGT	TCATCCTGTTCCCAAGACAGAAT	8.27	1.93	67
3R_22613285_22613342_FBgn0051156_-	CG31156	0	0	0.21	0.2	NA	0.205	0.000594	0.06	0	0.37	0.33	11.67	0.32	0.012459	32.76	11.67	11.67	0.32	3R_22613285_22613342_FBgn0051156_-	CGTGTAAGT	TTTACCCGATATCCTTCCAGGAC	8.58	9.45	57
3R_24530915_24530991_FBgn0262167_+	ana1	0.07	0.06	0.33	0.35	5.23	0.275	0.001649	0.04	0.02	0.29	0.41	11.67	0.32	0.034285	44.16	11.67	5.23	0.32	3R_24530915_24530991_FBgn0262167_+	CAGGTAACT	CCACTTAATTTTATAACCAGGTG	8.63	7.33	76
3R_8345024_8345092_FBgn0037580_+	DppIII	0.01	0.01	0.33	0.33	33	0.32	0	0.02	0.02	0.31	0.3	15.25	0.285	0.000308	42.03	33	15.25	0.32	3R_8345024_8345092_FBgn0037580_+	CAGGTATTT	GCCATATGATATCTTTGCAGCTG	7.51	7.97	68
3R_9015520_9015568_FBgn0037656_+	CG11986	0.06	0.06	0.4	0.36	6.33	0.32	0.003884	0.03	0.04	0.39	0.32	10.14	0.32	0.011988	30.61	10.14	6.33	0.32	3R_9015520_9015568_FBgn0037656_+	TCTGTAGGT	TCTATTAAACGCCTCTTCAGAAC	2.49	5	48
X_21117405_21117458_FBgn0031161_+	CG15445	0.49	0.48	0.62	0.67	1.33	0.16	0.024463	0.23	0.24	0.55	0.56	2.36	0.32	0.000488	42.59	2.36	1.33	0.32	X_21117405_21117458_FBgn0031161_+	CTCGTAAAT	TTGTGACGCGTCAGTTTCAGCCA	-3.14	-0.77	53
X_21117412_21117458_FBgn0031161_+	CG15445	0.22	0.23	0.49	0.51	2.22	0.275	0.001649	0.23	0.24	0.55	0.56	2.36	0.32	0.000488	46.81	2.36	2.22	0.32	X_21117412_21117458_FBgn0031161_+	ATAGTAAAT	TTGTGACGCGTCAGTTTCAGCCA	0.5	-0.77	46
2L_16680277_16680705_FBgn0267347_+	squ	0.09	0.05	0.24	0.33	4.07	0.215	0.048663	0.12	0.1	0.4	0.45	3.86	0.315	0.007228	40.09	4.07	3.86	0.315	2L_16680277_16680705_FBgn0267347_+	CTGGTGAGT	ACAAATAAATTTCGCCTAAGACA	10.1	-0.53	428
2L_16898679_16898745_FBgn0051805_-	CG31805	0.01	0	0.3	0.34	64	0.315	0.004256	0.03	0.02	0.28	0.36	12.8	0.295	0.018166	31.34	64	12.8	0.315	2L_16898679_16898745_FBgn0051805_-	AAGGTAAGA	TAATCAATTTCTTGCTCAAGTTT	10.57	1.99	66
2L_18257774_18257833_FBgn0051788_-	CG31788	0.01	0.01	0.32	0.33	32.5	0.315	0.000252	0.03	0.02	0.3	0.32	12.4	0.285	0.001535	33.33	32.5	12.4	0.315	2L_18257774_18257833_FBgn0051788_-	GTTGTGAGT	GTAGCAACGCCTCTTGTCAGTGA	6.59	-0.04	59
2L_21658855_21659094_FBgn0032956_+	Cul2	0.14	0.12	0.43	0.46	3.42	0.315	0.003259	0.2	0.2	0.27	0.29	1.4	0.08	0.015268	54.58	3.42	1.4	0.315	2L_21658855_21659094_FBgn0032956_+	CAGGTGAGT	CGTGCACCCTGTCCCATCAGAAA	10.67	7.87	239
2L_3362719_3362998_FBgn0085423_-	CG34394	0.06	0.04	0.14	0.14	2.8	0.09	0.012122	0.12	0.19	0.52	0.42	3.03	0.315	0.035551	37.5	3.03	2.8	0.315	2L_3362719_3362998_FBgn0085423_-	GAGGTAAGC	ACAATCAACATACATCTCAGGCA	9.85	2.94	279
2L_5554305_5554366_FBgn0031721_+	CG14017	0.22	0.25	0.54	0.46	2.13	0.265	0.025017	0.31	0.33	0.66	0.61	1.98	0.315	0.007228	25.81	2.13	1.98	0.315	2L_5554305_5554366_FBgn0031721_+	TCAGTATGA	TTTAGTGCATTTACTCATAGACC	1.13	4.93	61
2R_14372394_14372456_FBgn0050072_+	Obp50c	0.01	0	0.33	0.31	64	0.315	0.001257	0	0	0.32	0.3	NA	0.31	0.001039	33.33	64	64	0.315	2R_14372394_14372456_FBgn0050072_+	AATGTGAGC	GTTACAACTTATTCTTTTAGATT	5.2	7.22	62
2R_14372394_14372456_FBgn0050073_+	Obp50b	0.01	0	0.33	0.31	64	0.315	0.001257	0	0	0.32	0.3	NA	0.31	0.001039	33.33	64	64	0.315	2R_14372394_14372456_FBgn0050073_+	AATGTGAGC	GTTACAACTTATTCTTTTAGATT	5.2	7.22	62
3L_150019_150083_FBgn0263988_-	Dic61B	0.01	0.02	0.25	0.21	15.33	0.215	0.009069	0	0.02	0.32	0.33	32.5	0.315	0.001257	33.85	32.5	15.33	0.315	3L_150019_150083_FBgn0263988_-	CAGGTAAGC	TTTCCTTTACCAATTCTTAGGTT	9.88	8.24	64
3L_17793190_17793252_FBgn0261998_-	CG42816	0.02	0.04	0.39	0.3	11.5	0.315	0.020752	0.02	0.01	0.28	0.27	18.33	0.26	0.000739	39.68	18.33	11.5	0.315	3L_17793190_17793252_FBgn0261998_-	ACCGTGAGT	GGCCTTAAAAACGGAAACAGGAG	9.4	-1.24	62
3L_22262697_22262753_FBgn0028500_-	Rich	0.1	0.11	0.41	0.43	4	0.315	0.001257	0.1	0.1	0.37	0.36	3.65	0.265	0.000356	47.37	4	3.65	0.315	3L_22262697_22262753_FBgn0028500_-	CAGGTTGAA	GAACTTTTCCGTTTGCGCAGTAA	1.26	5.14	56
3L_584410_584478_FBgn0035144_-	Kah	0	0	0.33	0.25	NA	0.29	0.018499	0	0	0.25	0.38	NA	0.315	0.04004	37.68	0	0	0.315	3L_584410_584478_FBgn0035144_-	GTGGTGAGT	ATTTACGGTGGTGATTTCAGTGT	8.95	3.96	68
3R_14080464_14080710_FBgn0038197_+	foxo	0	0.07	0.38	0.31	9.86	0.31	0.024559	0.03	0.03	0.41	0.28	11.5	0.315	0.04004	39.27	11.5	9.86	0.315	3R_14080464_14080710_FBgn0038197_+	AGGGTCAGT	CGATCGTACGGTTGGAGCAGGTT	5.85	0.45	246
3R_19877283_19877341_FBgn0038741_-	CG17186	0	0.03	0.33	0.33	22	0.315	0.00226	0	0.02	0.33	0.26	29.5	0.285	0.015924	40.68	29.5	22	0.315	3R_19877283_19877341_FBgn0038741_-	AATGTGAGT	ATTGATTTCGCTTTTTACAGACT	7.8	7.02	58
3R_5606274_5606329_FBgn0261004_-	asl	0.01	0.01	0.37	0.28	32.5	0.315	0.019804	0.02	0.01	0.28	0.21	16.33	0.23	0.022824	44.64	32.5	16.33	0.315	3R_5606274_5606329_FBgn0261004_-	GAGGTAAGC	CGATTCCAATTCTACGCAAGCTT	9.85	-1.05	55
2L_15895812_15895868_FBgn0051735_+	CG31735	0.2	0.18	0.47	0.53	2.63	0.31	0.010246	0.22	0.2	0.48	0.49	2.31	0.275	0.001649	31.58	2.63	2.31	0.31	2L_15895812_15895868_FBgn0051735_+	CTGGTAATA	AAGACTTCTTCACCAAAAAGGAC	4.88	2.59	56
2L_16481552_16483807_FBgn0005677_-	dac	0.33	0.35	0.61	0.69	1.91	0.31	0.017234	0	0	0.08	0.11	NA	0.095	0.024036	38.48	1.91	1.91	0.31	2L_16481552_16483807_FBgn0005677_-	CAGGTACGA	TCTTCTCTTTTTAATTGCAGATG	10.03	10.87	2255
2L_16889126_16891457_FBgn0261671_+	tweek	0.03	0.07	0.26	0.31	5.7	0.235	0.018059	0.05	0	0.39	0.28	13.4	0.31	0.035946	39.54	13.4	5.7	0.31	2L_16889126_16891457_FBgn0261671_+	ATGGTGAGA	CCGATTTGAAATCTTTTTAGATA	7.23	6.41	2331
2L_2225358_2225409_FBgn0031401_+	papi	0.67	0.64	0.91	0.9	1.38	0.25	0.003976	0.9	0.85	1.18	1.19	1.35	0.31	0.006696	38.46	1.38	1.35	0.31	2L_2225358_2225409_FBgn0031401_+	TAGGTACGA	GACTGATCGACATATCCTAGATC	7.12	2.82	51
2L_2976555_2976818_FBgn0031483_-	CG9641	0.82	0.72	1.05	1.11	1.4	0.31	0.033606	0.79	0.72	0.97	0.99	1.3	0.225	0.025188	53.03	1.4	1.3	0.31	2L_2976555_2976818_FBgn0031483_-	TGTGTGAGT	AATCCCCTGCTGCCCCGCAGGCC	5.84	9.38	263
2R_18680074_18680129_FBgn0265626_-	CG44434	0.05	0.04	0.34	0.37	7.89	0.31	0.002591	0	0	0.26	0.31	NA	0.285	0.007607	28.57	7.89	7.89	0.31	2R_18680074_18680129_FBgn0265626_-	ATGGTAAGT	CTATAGCATATTATGTTTAGGCT	11.01	0.59	55
2R_18680074_18680129_FBgn0265627_-	CG44435	0.05	0.04	0.34	0.37	7.89	0.31	0.002591	0	0	0.26	0.31	NA	0.285	0.007607	28.57	7.89	7.89	0.31	2R_18680074_18680129_FBgn0265627_-	ATGGTAAGT	CTATAGCATATTATGTTTAGGCT	11.01	0.59	55
2R_8125474_8125532_FBgn0033265_-	coil	0.03	0	0.26	0.29	18.33	0.26	0.006591	0.02	0.01	0.27	0.38	21.67	0.31	0.030303	40.68	21.67	18.33	0.31	2R_8125474_8125532_FBgn0033265_-	CAGGTGAGA	GAGTGCCCTTGACATCTTAGTAG	9.22	0.84	58
3L_7239986_7240043_FBgn0261111_+	BHD	0	0.02	0.22	0.29	25.5	0.245	0.021369	0	0.04	0.3	0.36	16.5	0.31	0.013259	44.83	25.5	16.5	0.31	3L_7239986_7240043_FBgn0261111_+	AAAGTGAGT	CAATTGAATTCCATCTACAGCAA	8.4	5.53	57
3R_14080464_14080692_FBgn0038197_+	foxo	0	0.07	0.38	0.31	9.86	0.31	0.024559	0.03	0.08	0.41	0.29	6.36	0.295	0.045277	37.99	9.86	6.36	0.31	3R_14080464_14080692_FBgn0038197_+	AGGGTCAGT	CTCGTTTTTGCCACCCAACGATC	5.85	-3.08	228
3R_26415953_26416013_FBgn0039425_+	CG5432	0.7	0.74	0.89	0.86	1.22	0.155	0.025042	0.89	0.94	1.2	1.25	1.34	0.31	0.012759	37.7	1.34	1.22	0.31	3R_26415953_26416013_FBgn0039425_+	AAGGTGAGG	AAGCAGCCACTAACTTATAGCCT	9.16	-0.71	60
3R_5470460_5470511_FBgn0037330_-	mRpL44	0.02	0	0.34	0.3	32	0.31	0.005163	0.02	0	0.28	0.19	23.5	0.225	0.039505	48.08	32	23.5	0.31	3R_5470460_5470511_FBgn0037330_-	CTGGTGAGT	GTAATCGTGATTTTCGGCAGTGC	10.1	4.34	51
X_12235126_12235191_FBgn0052655_-	CG32655	0.04	0.04	0.35	0.34	8.62	0.305	0.000269	0.03	0.03	0.34	0.34	11.33	0.31	0	28.79	11.33	8.62	0.31	X_12235126_12235191_FBgn0052655_-	TGGGTAATA	AAACGGTATTAAATTTCTAGATA	4.95	4.78	65
X_15763126_15763180_FBgn0030687_+	CG17209	0	0	0.33	0.29	NA	0.31	0.004137	0	0	0.3	0.27	NA	0.285	0.002759	41.82	0	0	0.31	X_15763126_15763180_FBgn0030687_+	GATGTGAGT	ATTAACCGAAACAACTTCAGTTC	7.77	2	54
X_20933264_20933353_FBgn0031139_-	CG11227	0.54	0.52	0.77	0.72	1.41	0.215	0.015325	0.08	0.09	0.39	0.4	4.65	0.31	0.00052	36.67	4.65	1.41	0.31	X_20933264_20933353_FBgn0031139_-	GCGGTAAGG	ACTTTGTTTCAATAACTTAGAGT	9.63	5.55	89
2L_13723476_13723531_FBgn0028847_-	CG9014	0.02	0.01	0.32	0.32	21.33	0.305	0.000269	0.06	0.06	0.32	0.32	5.33	0.26	0	41.07	21.33	5.33	0.305	2L_13723476_13723531_FBgn0028847_-	GTGGTAAGT	TAACATCTCAGATTCTCCAGCGA	10.36	-0.61	55
2L_13723485_13723531_FBgn0028847_-	CG9014	0.02	0.01	0.32	0.32	21.33	0.305	0.000269	0.01	0.01	0.27	0.27	27	0.26	0	40.43	27	21.33	0.305	2L_13723485_13723531_FBgn0028847_-	GTGGTAAGT	AAAAAAAAATAACATCTCAGATT	10.36	1.62	46
2L_22042348_22042401_FBgn0051601_-	CG31601	0.03	0.02	0.31	0.35	13.2	0.305	0.004538	0.03	0.02	0.27	0.32	11.8	0.27	0.008799	42.59	13.2	11.8	0.305	2L_22042348_22042401_FBgn0051601_-	AAAGTAAGT	ACACTTTTTCCACACCGCAGCAT	9.72	5.71	53
2L_2886134_2946708_FBgn0041111_+	lilli	0.43	0.31	0.67	0.68	1.82	0.305	0.036829	0.1	0.07	0.41	0.32	4.29	0.28	0.02752	40.74	4.29	1.82	0.305	2L_2886134_2946708_FBgn0041111_+	TTCGTAAGC	ACTTTTCGTCCTTTTTGCAGCAT	5.42	10	60574
2R_12337269_12337337_FBgn0054021_+	CG34021	0.05	0.05	0.3	0.32	6.2	0.26	0.001476	0.04	0.05	0.33	0.37	7.78	0.305	0.004538	20.29	7.78	6.2	0.305	2R_12337269_12337337_FBgn0054021_+	AAGGCAATA	AAAGAATTGTAATTTTCTAGATA	0.73	4.08	68
2R_13252270_13252326_FBgn0033819_-	CG4714	0.02	0.01	0.27	0.24	17	0.24	0.004312	0.03	0.01	0.33	0.32	16.25	0.305	0.001341	38.6	17	16.25	0.305	2R_13252270_13252326_FBgn0033819_-	AGGGTGAGC	AATGAACAAATTTCCCGCAGAAC	7.75	7.26	56
2R_23368425_23368481_FBgn0034853_+	Ice1	0.05	0	0.29	0.37	13.2	0.305	0.023093	0.12	0.16	0.29	0.32	2.18	0.165	0.022195	42.11	13.2	2.18	0.305	2R_23368425_23368481_FBgn0034853_+	GAGGTAAAC	TACGTCCACATTCTTTCTAGATT	7.2	7.97	56
2R_7844973_7845033_FBgn0085390_-	Dgk	0.07	0.05	0.4	0.29	5.75	0.285	0.036386	0.05	0.03	0.39	0.3	8.62	0.305	0.022089	52.46	8.62	5.75	0.305	2R_7844973_7845033_FBgn0085390_-	AGGGTGTGT	ATTTCCGCTCTCGTTGCCAGGAC	4.51	8.8	60
3L_1616763_1616828_FBgn0035239_+	CG18170	0.37	0.4	0.65	0.73	1.79	0.305	0.019059	0.93	0.94	1.02	0.99	1.07	0.07	0.047421	48.48	1.79	1.07	0.305	3L_1616763_1616828_FBgn0035239_+	CAGGTAAGG	TGCGTCTATAGCTCCTACAGGTC	11.08	3.57	65
3L_1616763_1616828_FBgn0035240_+	CG33791	0.37	0.4	0.65	0.73	1.79	0.305	0.019059	0.93	0.94	1.02	0.99	1.07	0.07	0.047421	48.48	1.79	1.07	0.305	3L_1616763_1616828_FBgn0035240_+	CAGGTAAGG	TGCGTCTATAGCTCCTACAGGTC	11.08	3.57	65
3L_20965756_20966128_FBgn0037040_-	CG12983	0.07	0.05	0.39	0.34	6.08	0.305	0.007704	0.01	0.01	0.14	0.15	14.5	0.135	0.001369	37.27	14.5	6.08	0.305	3L_20965756_20966128_FBgn0037040_-	AAGGTAAAA	ACATTAATTAATATTTTCAGGCT	8.38	5.85	372
3L_20965912_20966128_FBgn0037040_-	CG12983	0.07	0.05	0.39	0.34	6.08	0.305	0.007704	0.49	0.46	0.67	0.73	1.47	0.225	0.021508	37.79	6.08	1.47	0.305	3L_20965912_20966128_FBgn0037040_-	AAGGTAAAA	ACCTTGCATATTTCTCGTAGGAA	8.38	7.19	216
3L_20966064_20966128_FBgn0037040_-	CG12983	0.07	0.05	0.39	0.34	6.08	0.305	0.007704	0.5	0.46	0.77	0.74	1.57	0.275	0.008163	36.92	6.08	1.57	0.305	3L_20966064_20966128_FBgn0037040_-	AAGGTAAAA	TGTTTTAGTTTTCCGTCTAGATT	8.38	4.98	64
3L_2951441_2951495_FBgn0052846_-	CG32846	0.02	0.01	0.29	0.34	21	0.3	0.007145	0.03	0.02	0.31	0.35	13.2	0.305	0.004538	40	21	13.2	0.305	3L_2951441_2951495_FBgn0052846_-	TCGGTGAGT	TTGATACGATGTACCAGCAGTTC	11.11	2.75	54
3R_12434179_12434239_FBgn0038049_+	CG5844	0.03	0.03	0.3	0.37	11.17	0.305	0.012914	0.1	0.07	0.29	0.33	3.65	0.225	0.012122	36.07	11.17	3.65	0.305	3R_12434179_12434239_FBgn0038049_+	CCGGTAAGT	TGATTGCCATTTTGGCTTAGATC	10.91	5.42	60
3R_23933411_23933476_FBgn0039129_-	RpS19b	0.07	0.07	0.41	0.34	5.36	0.305	0.012914	0.09	0.1	0.35	0.3	3.42	0.23	0.012065	33.33	5.36	3.42	0.305	3R_23933411_23933476_FBgn0039129_-	AAGGTAAGA	CTTAAAAACGTGCTTTCAAGAAC	10.57	1.46	65
3R_24943522_24943589_FBgn0029157_-	ssh	0.07	0.05	0.37	0.36	6.08	0.305	0.001341	0.01	0	0.09	0.1	19	0.09	0.006116	39.71	19	6.08	0.305	3R_24943522_24943589_FBgn0029157_-	CGGGTGAGG	TCCTTTCTCTATAACATCAGGAT	8.48	6.94	67
3R_30694913_30694968_FBgn0039796_-	CG12069	0.09	0.11	0.35	0.46	4.05	0.305	0.03199	0.08	0.1	0.33	0.38	3.94	0.265	0.010167	35.71	4.05	3.94	0.305	3R_30694913_30694968_FBgn0039796_-	AAAGTGAGT	CCATTTTCCGACTGTTAAAGAGT	8.4	3.87	55
3R_30817125_30817197_FBgn0027598_+	cindr	0.13	0.13	0.43	0.44	3.35	0.305	0.000269	0.13	0.16	0.37	0.34	2.45	0.21	0.010051	41.1	3.35	2.45	0.305	3R_30817125_30817197_FBgn0027598_+	GAGGTTCGT	TTTCGCTTCTCCAAATTCAGGGA	6.43	8.46	72
3R_5384859_5384937_FBgn0001311_-	kkv	0.06	0	0.25	0.22	7.83	0.205	0.025741	0	0.1	0.33	0.38	7.1	0.305	0.03199	36.71	7.83	7.1	0.305	3R_5384859_5384937_FBgn0001311_-	TTGGTAAGA	TTTTTATGCATTTTTCCAAGGGT	8.85	6.48	78
3R_7219122_7219181_FBgn0037486_-	CG14605	0.01	0.01	0.26	0.37	31.5	0.305	0.031013	0	0.01	0.21	0.3	51	0.25	0.03127	36.67	51	31.5	0.305	3R_7219122_7219181_FBgn0037486_-	ATCGTAAAT	AGCACTGCAATTCTTTACAGCTT	-2.35	5.76	59
X_2715281_2715337_FBgn0024991_+	CG2694	0.03	0	0.34	0.27	20.33	0.29	0.016808	0.03	0	0.38	0.26	21.33	0.305	0.038744	33.33	21.33	20.33	0.305	X_2715281_2715337_FBgn0024991_+	GCAGTGAGT	TAACACTGCGAATGCAATAGATC	7.39	1.21	56
2L_13119936_13119995_FBgn0262352_+	CG43050	0.27	0.39	0.65	0.61	1.91	0.3	0.041685	0.28	0.31	0.43	0.44	1.47	0.14	0.012516	20	1.91	1.47	0.3	2L_13119936_13119995_FBgn0262352_+	GTAGTAAGT	ATATATATACATTTTTTAAGCCT	8.01	3.5	59
2R_16867247_16867325_FBgn0014870_-	Psi	0.02	0.01	0.31	0.32	21	0.3	0.000555	0.02	0.02	0.28	0.3	14.5	0.27	0.001369	53.16	21	14.5	0.3	2R_16867247_16867325_FBgn0014870_-	CAGGTGAGT	TGCCCCAATCCCCAAACCAGATC	10.67	4.64	78
2R_16958193_16958260_FBgn0034172_+	CG6665	0.02	0	0.21	0.17	19	0.18	0.015084	0.05	0.02	0.32	0.35	9.57	0.3	0.004963	33.82	19	9.57	0.3	2R_16958193_16958260_FBgn0034172_+	GGCGTATGT	ACTTTGCTTTTACCTTACAGATC	5.39	11.1	67
2R_20620751_20620816_FBgn0034527_+	CG9945	0.44	0.45	0.67	0.73	1.57	0.255	0.013929	0.35	0.37	0.64	0.68	1.83	0.3	0.00551	33.33	1.83	1.57	0.3	2R_20620751_20620816_FBgn0034527_+	GTTGTAAGG	TTCGTTACATTCATTCATAGTGG	4.34	4.79	65
2R_24051973_24052029_FBgn0003353_+	sei	0	0	0.25	0.35	NA	0.3	0.026671	0.04	0	0.22	0.29	12.75	0.235	0.028187	43.86	12.75	12.75	0.3	2R_24051973_24052029_FBgn0003353_+	ACGGTGAGT	ACGAGTACTTGAACTTGCAGAGC	11.45	4.84	56
2R_24124813_24124870_FBgn0264297_-	CG43775	0.02	0.02	0.34	0.3	16	0.3	0.004415	0.01	0.01	0.31	0.29	30	0.29	0.001187	55.17	30	16	0.3	2R_24124813_24124870_FBgn0264297_-	CAGGTGAGC	ACCACGGAATGCTCCCACAGGGA	9.6	5.68	57
2R_24124813_24124870_FBgn0264298_-	CG43776	0.02	0.02	0.34	0.3	16	0.3	0.004415	0.01	0.01	0.31	0.29	30	0.29	0.001187	55.17	30	16	0.3	2R_24124813_24124870_FBgn0264298_-	CAGGTGAGC	ACCACGGAATGCTCCCACAGGGA	9.6	5.68	57
2R_24124813_24124870_FBgn0264299_-	CG43777	0.02	0.02	0.34	0.3	16	0.3	0.004415	0.01	0.01	0.31	0.29	30	0.29	0.001187	55.17	30	16	0.3	2R_24124813_24124870_FBgn0264299_-	CAGGTGAGC	ACCACGGAATGCTCCCACAGGGA	9.6	5.68	57
2R_6744778_6744837_FBgn0028579_+	phtf	0.05	0.04	0.34	0.33	7.44	0.29	0.000594	0.05	0.05	0.35	0.35	7	0.3	0	46.67	7.44	7	0.3	2R_6744778_6744837_FBgn0028579_+	GAGGTATGT	TACTGGTCAAATGCACTCAGGTC	9.81	2.35	59
3L_844684_844740_FBgn0035168_+	cep290	0.05	0.01	0.27	0.38	10.83	0.295	0.037176	0.07	0.02	0.29	0.4	7.67	0.3	0.038244	42.11	10.83	7.67	0.3	3L_844684_844740_FBgn0035168_+	GAGGTGAGC	ATACGCTTTTTTCTCACTAGTTG	8.7	8.28	56
3R_6559905_6560149_FBgn0037454_-	CG1137	0.1	0.11	0.4	0.41	3.86	0.3	0.000555	0.09	0.09	0.28	0.3	3.22	0.2	0.002491	29.39	3.86	3.22	0.3	3R_6559905_6560149_FBgn0037454_-	ATGGTGAGG	ATTACACCTTCTGCGCCTAGAAT	7.61	6.14	244
3R_9257167_9257286_FBgn0037668_-	CG16736	0.09	0.1	0.43	0.36	4.16	0.3	0.013606	0.03	0.03	0.26	0.27	8.83	0.235	0.000452	30.83	8.83	4.16	0.3	3R_9257167_9257286_FBgn0037668_-	CAAGTAAGA	AAGTTAACCCTTTTTTGTAGCTA	7.61	3.43	119
X_17077441_17077680_FBgn0030812_-	wcy	0.26	0.25	0.6	0.51	2.18	0.3	0.022028	0.26	0.21	0.56	0.49	2.23	0.29	0.021297	42.92	2.23	2.18	0.3	X_17077441_17077680_FBgn0030812_-	GCGGTAAGG	ATGAATGTTTGTACTTTTAGGAG	9.63	7.74	239
2L_2412027_2414808_FBgn0031426_-	CG18641	0.26	0.31	0.53	0.63	2.04	0.295	0.034084	0.09	0.08	0.18	0.22	2.35	0.115	0.030666	40.55	2.35	2.04	0.295	2L_2412027_2414808_FBgn0031426_-	CCGGTTCGT	ATCTCACATCCTCCATACAGCGG	5.83	7.82	2781
2R_13221377_13221439_FBgn0043010_-	Fsn	0.02	0.01	0.3	0.27	19	0.27	0.003412	0.01	0	0.29	0.31	60	0.295	0.001433	44.44	60	19	0.295	2R_13221377_13221439_FBgn0043010_-	GGGGTAAGG	TATGCACTTTCACCTTGCAGGCC	8.05	10.24	62
2R_14240114_14240210_FBgn0033916_+	Usp20-33	0.1	0.1	0.38	0.41	3.95	0.295	0.002575	0.08	0.11	0.37	0.39	4	0.285	0.003977	46.39	4	3.95	0.295	2R_14240114_14240210_FBgn0033916_+	ACGGTAAGG	TTCGATTTTTTCTCGGTCAGCTG	10.38	5.07	96
2R_19059487_19059595_FBgn0034416_+	CG15109	0.01	0.01	0.3	0.29	29.5	0.285	0.000308	0.02	0.01	0.31	0.31	20.67	0.295	0.000287	31.19	29.5	20.67	0.295	2R_19059487_19059595_FBgn0034416_+	AAAGTAAGT	AACTCAACTGTCTTCCACAGCGC	9.72	8.2	108
3L_15108959_15109337_FBgn0266441_+	CG45071	0.1	0.08	0.41	0.36	4.28	0.295	0.008228	0.03	0.04	0.18	0.21	5.57	0.16	0.009625	29.55	5.57	4.28	0.295	3L_15108959_15109337_FBgn0266441_+	CAAGTAAGT	TATCCCACTCTCTCTCCCAGAGA	10.08	8.76	378
3L_184682_184774_FBgn0027786_+	Mtch	0.31	0.31	0.56	0.65	1.95	0.295	0.022487	0.42	0.42	0.56	0.57	1.35	0.145	0.001187	37.63	1.95	1.35	0.295	3L_184682_184774_FBgn0027786_+	TTTGTAATA	TTTTTCTGTCTTTTGCACAGCAG	-6.47	7.77	92
3L_184682_184777_FBgn0027786_+	Mtch	0.31	0.31	0.56	0.65	1.95	0.295	0.022487	0.64	0.64	0.75	0.74	1.16	0.105	0.00226	38.54	1.95	1.16	0.295	3L_184682_184777_FBgn0027786_+	TTTGTAATA	TTCTGTCTTTTGCACAGCAGTCC	-6.47	3.67	95
3L_21554181_21554553_FBgn0037098_-	Wnk	0.25	0.38	0.61	0.61	1.94	0.295	0.045277	0.11	0.09	0.34	0.33	3.35	0.235	0.002256	54.42	3.35	1.94	0.295	3L_21554181_21554553_FBgn0037098_-	TATGTATGT	CGCCTTGCCTCTCGCTTCAGATT	3.25	9.86	372
3R_10349483_10349544_FBgn0051406_+	CG31406	0.01	0	0.29	0.31	60	0.295	0.001433	0.01	0	0.28	0.32	60	0.295	0.004848	16.13	60	60	0.295	3R_10349483_10349544_FBgn0051406_+	GAAGTAAGA	ACAAAATATAAAATATTTAGAAA	6.42	1.05	61
3R_12627562_12627639_FBgn0005671_-	Vha55	0.04	0.08	0.33	0.38	5.92	0.295	0.011574	0.8	0.82	0.87	0.87	1.07	0.06	0.026671	39.74	5.92	1.07	0.295	3R_12627562_12627639_FBgn0005671_-	ATTGTATGT	TTGCAGCTCGAAATTTGCAGTGC	4.34	2.38	77
3R_12627576_12627639_FBgn0005671_-	Vha55	0.04	0.08	0.33	0.38	5.92	0.295	0.011574	0.05	0.08	0.31	0.35	5.08	0.265	0.008783	39.06	5.92	5.08	0.295	3R_12627576_12627639_FBgn0005671_-	ATTGTATGT	AAAATCGTATCTAATTGCAGCTC	4.34	6.46	63
4_129443_129554_FBgn0011747_-	Ank	0.51	0.52	0.83	0.79	1.57	0.295	0.004848	0.23	0.18	0.37	0.35	1.76	0.155	0.028876	19.64	1.76	1.57	0.295	4_129443_129554_FBgn0011747_-	ATTGTAGGC	ACTTTTTTTTTAATATTTAGGCC	0.43	9.3	111
X_2739233_2739296_FBgn0024980_-	Syx4	0.17	0.17	0.41	0.46	2.56	0.265	0.008783	0.2	0.18	0.54	0.43	2.55	0.295	0.034084	51.56	2.56	2.55	0.295	X_2739233_2739296_FBgn0024980_-	AAGGTGGGC	ATTTTCCCTTGTATTTGCAGAAA	7.93	10.27	63
2L_15957973_15958030_FBgn0028856_+	CG18063	0.87	0.86	0.98	1.03	1.16	0.14	0.0316	0.01	0	0.31	0.28	59	0.29	0.002959	27.59	59	1.16	0.29	2L_15957973_15958030_FBgn0028856_+	CTCGTTGTA	TAGTATTGTTTATGTTTTAGAAA	-24.13	6.65	57
2L_2046219_2046427_FBgn0028952_+	Kebab	0.3	0.26	0.56	0.58	2.04	0.29	0.005893	0.03	0.04	0.19	0.17	5.14	0.145	0.005893	32.06	5.14	2.04	0.29	2L_2046219_2046427_FBgn0028952_+	GAGGTGTGT	TGTTTTCTGCTATTTAACAGCCA	6.14	7.25	208
2L_2718775_2718839_FBgn0051690_+	CG31690	0	0	0.25	0.33	NA	0.29	0.018499	0	0	0.25	0.33	NA	0.29	0.018499	38.46	0	0	0.29	2L_2718775_2718839_FBgn0051690_+	AATGTAAGA	ATATTTTATTGGACTTGCAGGGC	5.55	6.64	64
2L_7709702_7709761_FBgn0041181_+	Tep3	0.09	0.08	0.35	0.4	4.41	0.29	0.00764	0.09	0.07	0.35	0.35	4.38	0.27	0.001369	26.67	4.41	4.38	0.29	2L_7709702_7709761_FBgn0041181_+	GAGGTGAGT	TTAATTGGCCCACTTTCTAGCTG	10.03	5.39	59
2R_10138334_10138391_FBgn0033490_+	CG12917	0.02	0.03	0.29	0.34	12.6	0.29	0.00764	0.02	0.02	0.25	0.29	13.5	0.25	0.006339	37.93	13.5	12.6	0.29	2R_10138334_10138391_FBgn0033490_+	TTTGTGAGT	TATAGTGTAAGGAGTTATAGTTC	5.91	-12.12	57
2R_16418965_16419018_FBgn0029153_-	Menl-2	0.02	0.03	0.31	0.32	12.6	0.29	0.000594	0.05	0.07	0.32	0.32	5.33	0.26	0.001476	37.04	12.6	5.33	0.29	2R_16418965_16419018_FBgn0029153_-	AAGGTAACT	ATGACAATAGATCCTGATAGGCC	9.01	-2.29	53
2R_16418965_16419018_FBgn0029154_-	Menl-1	0.02	0.03	0.31	0.32	12.6	0.29	0.000594	0.05	0.07	0.32	0.32	5.33	0.26	0.001476	37.04	12.6	5.33	0.29	2R_16418965_16419018_FBgn0029154_-	AAGGTAACT	ATGACAATAGATCCTGATAGGCC	9.01	-2.29	53
2R_22711570_22711619_FBgn0050275_+	CG30275	0.03	0.03	0.32	0.31	10.5	0.285	0.000308	0.02	0.03	0.35	0.28	12.6	0.29	0.01454	30	12.6	10.5	0.29	2R_22711570_22711619_FBgn0050275_+	AATGTAAGT	TAAAAGTTGAAACTTCTTAGGGC	8.62	2.06	49
2R_22784397_22784452_FBgn0061435_+	CG30270	0.01	0.01	0.28	0.32	30	0.29	0.004723	0.01	0.01	0.26	0.3	28	0.27	0.005442	33.93	30	28	0.29	2R_22784397_22784452_FBgn0061435_+	CTGGTAAGA	TAAGCACGTGTAAACCTAAGATA	9.45	-1.57	55
3L_17368584_17368643_FBgn0036715_-	Cad74A	0	0	0.25	0.33	NA	0.29	0.018499	0	0	0.25	0.33	NA	0.29	0.018499	36.67	0	0	0.29	3L_17368584_17368643_FBgn0036715_-	AAAGTAAGT	TCATTATTAACCTTTTCCAGGCT	9.72	7.59	59
3L_21680233_21680299_FBgn0037117_+	CG11248	0.04	0.03	0.35	0.3	9.29	0.29	0.00764	0.07	0.07	0.33	0.26	4.21	0.225	0.023353	35.82	9.29	4.21	0.29	3L_21680233_21680299_FBgn0037117_+	CTGGTTTGC	CTAAAATAAAATTTTTTCAGCTC	0.72	4.45	66
3L_4222361_4222411_FBgn0052252_-	CR32252	0.01	0.02	0.21	0.17	12.67	0.175	0.013595	0.07	0.07	0.41	0.31	5.14	0.29	0.028463	31.37	12.67	5.14	0.29	3L_4222361_4222411_FBgn0052252_-	AAGGTAAAA	TACAATTCTTACCCGTGTAGTCT	8.38	5.63	50
X_13107900_13107961_FBgn0030449_-	Fer3HCH	0.02	0.02	0.3	0.32	15.5	0.29	0.001187	0.02	0.01	0.29	0.31	20	0.285	0.001535	35.48	20	15.5	0.29	X_13107900_13107961_FBgn0030449_-	ATGGTAAGG	AGTACGTTCAATACACGTAGGCC	9.33	2.95	61
X_18089925_18089982_FBgn0030892_-	CG7206	0.05	0.04	0.26	0.32	6.44	0.245	0.015063	0.08	0.05	0.3	0.41	5.46	0.29	0.03654	48.28	6.44	5.46	0.29	X_18089925_18089982_FBgn0030892_-	CTGGTGAGT	TCTCCTTATCGTCTCCCTAGCCT	10.1	9.26	57
X_9568572_9568637_FBgn0052702_-	Cubn	0	0	0.25	0.25	NA	0.25	0	0	0	0.33	0.25	NA	0.29	0.018499	31.82	0	0	0.29	X_9568572_9568637_FBgn0052702_-	CTGGTGAGT	AAGCACAATACTTCATGAAGATC	10.1	-3.02	65
2L_13782946_13782996_FBgn0028932_-	CG16890	0.04	0.03	0.36	0.27	9	0.28	0.025165	0.04	0.03	0.36	0.28	9.14	0.285	0.019425	47.06	9.14	9	0.285	2L_13782946_13782996_FBgn0028932_-	AAGGTGGGT	CACTAATGGGAATTCCATAGGTG	8.23	3.78	50
2L_18674061_18674113_FBgn0261349_-	Mst36Fb	0.07	0.09	0.32	0.3	3.88	0.23	0.003759	0.1	0.12	0.42	0.37	3.59	0.285	0.008808	52.83	3.88	3.59	0.285	2L_18674061_18674113_FBgn0261349_-	CAGGTGAGT	ATACTCACCTCCGTCCGCAGCCC	10.67	9.12	52
2L_18675509_18675565_FBgn0086681_-	Mst36Fa	0.03	0.04	0.31	0.27	8.29	0.255	0.006473	0.02	0.02	0.35	0.26	15.25	0.285	0.024036	36.84	15.25	8.29	0.285	2L_18675509_18675565_FBgn0086681_-	AGGGTAAGT	ATTAGATGAAATGTCACTAGGAA	10.45	2.48	56
2L_21914749_21914801_FBgn0051600_-	--	0.03	0.06	0.25	0.27	5.78	0.215	0.006958	0.02	0.02	0.3	0.31	15.25	0.285	0.000308	41.51	15.25	5.78	0.285	2L_21914749_21914801_FBgn0051600_-	GCGGTATGT	AAGGGTTTTGCTTTTCACAGGTT	9.45	7.06	52
2R_11864455_11864518_FBgn0260436_+	CG42531	0.59	0.61	0.89	0.88	1.48	0.285	0.001535	0.7	0.8	0.99	1.01	1.33	0.25	0.039172	53.12	1.48	1.33	0.285	2R_11864455_11864518_FBgn0260436_+	ATCGTAAGT	TCCAAGCTAAACCACTATAGAGA	10.44	-0.73	63
2R_6754845_6754898_FBgn0027066_+	Eb1	0.44	0.41	0.72	0.7	1.67	0.285	0.003977	0.41	0.39	0.66	0.63	1.61	0.245	0.005371	35.19	1.67	1.61	0.285	2R_6754845_6754898_FBgn0027066_+	CAGGTGGGT	GTACTAATATTATGGATCAGGTG	8.56	4.73	53
2R_6993061_6993120_FBgn0050159_+	CG30159	0.53	0.56	0.82	0.84	1.52	0.285	0.003977	0.5	0.46	0.7	0.78	1.54	0.26	0.028334	60	1.54	1.52	0.285	2R_6993061_6993120_FBgn0050159_+	AAAGTGAGA	AACCAGCGACCACTTTCCAGTTA	4.23	0.58	59
3L_12137296_12137352_FBgn0036255_+	Atg12	0.06	0.1	0.31	0.42	4.56	0.285	0.039674	0.08	0.13	0.34	0.37	3.38	0.25	0.013329	35.09	4.56	3.38	0.285	3L_12137296_12137352_FBgn0036255_+	ATTGCACGT	TGTGTCATCTTAATTTTTAGTTC	-2.12	9.18	56
3L_1608068_1608133_FBgn0035239_+	CG18170	0.01	0.01	0.29	0.3	29.5	0.285	0.000308	0.02	0.02	0.3	0.28	14.5	0.27	0.001369	54.55	29.5	14.5	0.285	3L_1608068_1608133_FBgn0035239_+	CAGGTGAGA	TGATTGGGCGCATCCTCCAGCTC	9.22	3.93	65
3L_1608068_1608133_FBgn0035240_+	CG33791	0.01	0.01	0.29	0.3	29.5	0.285	0.000308	0.02	0.02	0.3	0.28	14.5	0.27	0.001369	54.55	29.5	14.5	0.285	3L_1608068_1608133_FBgn0035240_+	CAGGTGAGA	TGATTGGGCGCATCCTCCAGCTC	9.22	3.93	65
3L_20965912_20965977_FBgn0037040_-	CG12983	0.6	0.61	0.87	0.91	1.47	0.285	0.005192	0.49	0.46	0.67	0.73	1.47	0.225	0.021508	36.36	1.47	1.47	0.285	3L_20965912_20965977_FBgn0037040_-	GATGTAGGG	ACCTTGCATATTTCTCGTAGGAA	1.09	7.19	65
3R_20046471_20046523_FBgn0064119_+	CG33934	0.02	0.01	0.29	0.31	20	0.285	0.001535	0.03	0.03	0.27	0.31	9.67	0.26	0.005865	43.4	20	9.67	0.285	3R_20046471_20046523_FBgn0064119_+	GCGGTAAGG	AGGCAGCTCTCTTCGACCAGCTT	9.63	1.03	52
3R_20046471_20046523_FBgn0260466_+	Indy-2	0.02	0.01	0.29	0.31	20	0.285	0.001535	0.03	0.03	0.27	0.31	9.67	0.26	0.005865	43.4	20	9.67	0.285	3R_20046471_20046523_FBgn0260466_+	GCGGTAAGG	AGGCAGCTCTCTTCGACCAGCTT	9.63	1.03	52
3R_24058800_24058854_FBgn0040283_+	SMC1	0	0	0.28	0.23	NA	0.255	0.009475	0.02	0	0.35	0.24	29.5	0.285	0.036386	36.36	29.5	29.5	0.285	3R_24058800_24058854_FBgn0040283_+	GAGGTTCGT	TAATCATATCCCCCATTTAGAGC	6.43	6.45	54
3R_31590737_31590792_FBgn0039855_+	CG1638	0	0.01	0.31	0.27	58	0.285	0.005192	0.02	0.03	0.31	0.25	11.2	0.255	0.013929	39.29	58	11.2	0.285	3R_31590737_31590792_FBgn0039855_+	CAGGTGAAG	ATAGGCCACATTTCTTCTAGCTC	6.66	4.72	55
3R_5375217_5375277_FBgn0037317_+	CG14667	0.02	0.08	0.31	0.36	6.7	0.285	0.018262	0.04	0.06	0.18	0.22	4	0.15	0.021508	45.9	6.7	4	0.285	3R_5375217_5375277_FBgn0037317_+	GAGGTAGGT	ATTACCTGGAATTTGTTCAGCTG	9.65	3.98	60
3R_6559031_6559097_FBgn0037454_-	CG1137	0	0	0.27	0.27	NA	0.27	0	0	0	0.29	0.28	NA	0.285	0.000308	32.84	0	0	0.285	3R_6559031_6559097_FBgn0037454_-	AAAGTAAGT	CAATTGGCCAAAATCCTTAGAAA	9.72	1.59	66
X_22540887_22540939_FBgn0031195_+	CG17600	0.28	0.3	0.57	0.58	1.98	0.285	0.001535	0.28	0.28	0.35	0.35	1.25	0.07	0	45.28	1.98	1.25	0.285	X_22540887_22540939_FBgn0031195_+	AAGGTGCTG	TCCAGCTTCATTTCGTGCAGGTG	4.05	7.05	52
X_4213063_4213117_FBgn0262980_+	CG43288	0.03	0.04	0.31	0.33	9.14	0.285	0.001535	0.03	0.04	0.27	0.24	7.29	0.22	0.005126	25.45	9.14	7.29	0.285	X_4213063_4213117_FBgn0262980_+	TTTGTAAGC	ATACGATTGCCTTTTTTTAGTAT	3.93	6.35	54
2L_7032840_7032903_FBgn0031883_+	Caper	0.38	0.46	0.74	0.66	1.67	0.28	0.038476	0.39	0.41	0.64	0.6	1.55	0.22	0.010173	51.56	1.67	1.55	0.28	2L_7032840_7032903_FBgn0031883_+	TTCGTAAGT	GATTTCTCCAAACGTGCCAGACA	9.77	2.33	63
2R_10083494_10083573_FBgn0033483_+	egr	0	0	0.24	0.19	NA	0.215	0.013253	0	0	0.25	0.31	NA	0.28	0.011286	43.75	0	0	0.28	2R_10083494_10083573_FBgn0033483_+	TGGGTAAGG	TCACTTCTTGAATTTCTCAGGCT	9.08	6.84	79
2R_11988297_11988361_FBgn0033672_-	rho-7	0.01	0	0.3	0.27	57	0.28	0.003174	0.01	0	0.26	0.22	48	0.235	0.007608	43.08	57	48	0.28	2R_11988297_11988361_FBgn0033672_-	GCAGTAAGA	TCCCTGATTCACGCTTGTAGTTT	4.95	5.98	64
2R_22712360_22712416_FBgn0050275_+	CG30275	0.03	0.03	0.28	0.31	9.83	0.265	0.003189	0.03	0.03	0.29	0.33	10.33	0.28	0.005063	35.09	10.33	9.83	0.28	2R_22712360_22712416_FBgn0050275_+	TCAGTGGGT	TGCTATTTGAACCTTTACAGCGT	1.3	7.37	56
2R_22716320_22716374_FBgn0050268_+	CG30268	0	0	0.29	0.27	NA	0.28	0.001273	0.04	0.04	0.23	0.34	7.13	0.245	0.04688	30.91	7.13	7.13	0.28	2R_22716320_22716374_FBgn0050268_+	ACGGTACGG	AATTCTTTGTTCTTTTCCAGTTC	9.91	9.94	54
2R_24429959_24430011_FBgn0035003_-	CG15873	0.01	0.02	0.3	0.29	19.67	0.28	0.000637	0.1	0.12	0.35	0.31	3	0.22	0.010173	56.6	19.67	3	0.28	2R_24429959_24430011_FBgn0035003_-	CAGGTGAGC	AGTAATGCCACTCTCCCCAGCAC	9.6	3.95	52
2R_7837475_7837587_FBgn0085390_-	Dgk	0.01	0.01	0.33	0.23	28	0.27	0.032625	0.01	0.01	0.29	0.29	29	0.28	0	55.75	29	28	0.28	2R_7837475_7837587_FBgn0085390_-	GTGGTGAGT	CCTTCGCTCCGTATTTGCAGTGC	8.95	7.74	112
3L_11880677_11880727_FBgn0036218_+	Sprn	0.4	0.41	0.68	0.69	1.69	0.28	0.000637	0.37	0.35	0.62	0.59	1.68	0.245	0.005371	50.98	1.69	1.68	0.28	3L_11880677_11880727_FBgn0036218_+	AAGGTAAAG	CCGTTCCCCCTCCTTCTCAGGCG	9.06	8.79	50
3L_20388568_20388668_FBgn0011205_+	fbl	0.02	0.05	0.33	0.3	9	0.28	0.005691	0.06	0.05	0.15	0.14	2.64	0.09	0.006116	35.64	9	2.64	0.28	3L_20388568_20388668_FBgn0011205_+	TGGGTGGGT	TCAATACTCTGCCATTGCAGCGA	3.82	6.44	100
3L_236502_236553_FBgn0000541_-	E(bx)	0.04	0.01	0.28	0.24	10.4	0.235	0.011129	0.09	0.15	0.4	0.4	3.33	0.28	0.011286	23.08	10.4	3.33	0.28	3L_236502_236553_FBgn0000541_-	ATTGTAAGC	AATTTATAATCTAGTTCTAGTTG	5.06	-0.99	51
3L_3244080_3244146_FBgn0035426_-	CG12078	0.02	0.02	0.3	0.3	15	0.28	0	0.02	0.01	0.27	0.25	17.33	0.245	0.002076	35.82	17.33	15	0.28	3L_3244080_3244146_FBgn0035426_-	TTAGTAAGT	CACCTAACGCATTTATGCAGCGT	7.79	3.29	66
3L_3322843_3322909_FBgn0035437_-	Strip	0.04	0.04	0.32	0.31	7.88	0.275	0.00033	0.04	0.04	0.33	0.31	8	0.28	0.001273	43.28	8	7.88	0.28	3L_3322843_3322909_FBgn0035437_-	TCGGTGAGC	GATTCCTTTTTGAATTACAGCTG	9.1	7.08	66
3L_8407467_8407521_FBgn0265102_-	Oseg1	0.3	0.21	0.48	0.53	1.98	0.25	0.039881	0.35	0.25	0.54	0.62	1.93	0.28	0.048521	29.09	1.98	1.93	0.28	3L_8407467_8407521_FBgn0265102_-	CTGGTAAGG	TATTAAGTAACCCTTTTTAGCTT	9.68	3.36	54
3R_21882883_21882940_FBgn0051465_+	CG31465	0.06	0.09	0.28	0.36	4.27	0.245	0.029084	0.04	0.14	0.36	0.38	4.11	0.28	0.0316	29.31	4.27	4.11	0.28	3R_21882883_21882940_FBgn0051465_+	CAGGTAAGT	TTATGAATATCGTGTAAAAGCAA	10.86	0.77	57
3R_27265949_27265996_FBgn0039504_+	CG14260	0.07	0.06	0.33	0.29	4.77	0.245	0.007006	0.07	0.05	0.36	0.32	5.67	0.28	0.006317	41.67	5.67	4.77	0.28	3R_27265949_27265996_FBgn0039504_+	AAAGTATGA	TAATCCCCATACCATTCCAGAAA	3.87	4.64	47
3R_8087713_8087785_FBgn0037547_+	CG7910	0.13	0.22	0.43	0.48	2.6	0.28	0.032178	0.15	0.19	0.41	0.42	2.44	0.245	0.007006	49.32	2.6	2.44	0.28	3R_8087713_8087785_FBgn0037547_+	GAGGTGAGT	ATGTCGGGGTTCGATTCCAGATC	10.03	6.16	72
3R_8721562_8721622_FBgn0037616_+	CG8136	0.01	0.01	0.27	0.31	29	0.28	0.005063	0.01	0.01	0.23	0.26	24.5	0.235	0.00405	44.26	29	24.5	0.28	3R_8721562_8721622_FBgn0037616_+	CGGGTGAGT	ATGTGTGTTCTTTGCTCCAGAAG	9.89	9.45	60
X_21309273_21309330_FBgn0031171_-	CG1801	0.01	0.01	0.21	0.25	23	0.22	0.008163	0.02	0.02	0.28	0.32	15	0.28	0.005063	39.66	23	15	0.28	X_21309273_21309330_FBgn0031171_-	AGAGTGAGT	AGAATTCAACACTCCGGCAGTCT	7.36	0.24	57
2L_18709482_18709543_FBgn0032705_+	Grip71	0.02	0.02	0.34	0.23	14.25	0.265	0.040478	0.02	0.02	0.35	0.24	14.75	0.275	0.03775	35.48	14.75	14.25	0.275	2L_18709482_18709543_FBgn0032705_+	CGAGTAAGT	CGCTATCCTGTTAATATCAGCTC	10.15	4.09	61
2L_18838796_18838882_FBgn0032717_-	CG10600	0.01	0.01	0.21	0.24	22.5	0.215	0.004832	0.02	0.01	0.28	0.3	19.33	0.275	0.001649	49.43	22.5	19.33	0.275	2L_18838796_18838882_FBgn0032717_-	CAGGTAAAG	CTCGCCAACGCCGCCCACAGAAG	9.65	4.38	86
2R_23599957_23600046_FBgn0260761_-	CG42559	0.16	0.19	0.46	0.44	2.57	0.275	0.00427	0.47	0.47	0.56	0.56	1.19	0.09	0	33.33	2.57	1.19	0.275	2R_23599957_23600046_FBgn0260761_-	ACGGTAGGC	AAATTATCTTCCTCCGTAAGGAT	8.81	2.97	89
2R_23599957_23600046_FBgn0260762_-	CG42560	0.16	0.19	0.46	0.44	2.57	0.275	0.00427	0.47	0.47	0.56	0.56	1.19	0.09	0	33.33	2.57	1.19	0.275	2R_23599957_23600046_FBgn0260762_-	ACGGTAGGC	AAATTATCTTCCTCCGTAAGGAT	8.81	2.97	89
2R_7707307_7707362_FBgn0003733_-	tor	0	0	0.25	0.18	NA	0.215	0.025492	0	0	0.33	0.22	NA	0.275	0.03775	35.71	0	0	0.275	2R_7707307_7707362_FBgn0003733_-	GCGGTACGT	CATTTCCATCCATTGAACAGAGG	10.27	4.13	55
2R_8125210_8125266_FBgn0033265_-	coil	0	0	0.29	0.26	NA	0.275	0.002962	0	0	0.28	0.27	NA	0.275	0.00033	29.82	0	0	0.275	2R_8125210_8125266_FBgn0033265_-	TAAGTAAGC	GATCTCGTTAAAATTTTTAGCTT	5.66	3.74	56
3L_20000673_20000990_FBgn0036928_+	Tom20	0.33	0.34	0.63	0.59	1.82	0.275	0.005573	0.01	0.02	0.09	0.08	5.67	0.07	0.010051	22.64	5.67	1.82	0.275	3L_20000673_20000990_FBgn0036928_+	GTGGTAAAT	ATTAAATAAATATCCCTTAGCAA	5.18	2.22	317
3L_7467076_7467128_FBgn0035786_+	Tsp66A	0	0	0.19	0.14	NA	0.165	0.022195	0	0	0.22	0.33	NA	0.275	0.03775	32.08	0	0	0.275	3L_7467076_7467128_FBgn0035786_+	ATTGTAAGT	AACATCTTGTCTTTTGTAAGCAA	8.54	2.26	52
3L_7467076_7467128_FBgn0261536_+	CG42660	0	0	0.19	0.14	NA	0.165	0.022195	0	0	0.22	0.33	NA	0.275	0.03775	32.08	0	0	0.275	3L_7467076_7467128_FBgn0261536_+	ATTGTAAGT	AACATCTTGTCTTTTGTAAGCAA	8.54	2.26	52
3L_7467076_7467128_FBgn0261537_+	CG42661	0	0	0.19	0.14	NA	0.165	0.022195	0	0	0.22	0.33	NA	0.275	0.03775	32.08	0	0	0.275	3L_7467076_7467128_FBgn0261537_+	ATTGTAAGT	AACATCTTGTCTTTTGTAAGCAA	8.54	2.26	52
3R_30127850_30127900_FBgn0051025_-	Ppi1	0.05	0.04	0.25	0.25	5.56	0.205	0.000594	0.02	0.02	0.29	0.3	14.75	0.275	0.00033	35.29	14.75	5.56	0.275	3R_30127850_30127900_FBgn0051025_-	CAGGTGAAA	TTCTAAATGGTTTCCCTTAGGAT	5.07	8.43	50
3R_30306292_30306347_FBgn0085329_-	CG34300	0.04	0.02	0.27	0.34	10.17	0.275	0.017073	0.17	0.14	0.33	0.41	2.39	0.215	0.037287	46.43	10.17	2.39	0.275	3R_30306292_30306347_FBgn0085329_-	TTGGTATGT	CATATCATCTCTTACAGCAGATC	7.12	4.62	55
3R_30306295_30306347_FBgn0085329_-	CG34300	0.04	0.02	0.27	0.34	10.17	0.275	0.017073	0.04	0.01	0.26	0.31	11.4	0.26	0.012342	45.28	11.4	10.17	0.275	3R_30306295_30306347_FBgn0085329_-	TTGGTATGT	TCCCATATCATCTCTTACAGCAG	7.12	7.89	52
3R_7539502_7539562_FBgn0015571_-	alpha-Est3	0.03	0.02	0.3	0.3	12	0.275	0.00033	0.03	0.02	0.26	0.27	10.6	0.24	0.000867	32.79	12	10.6	0.275	3R_7539502_7539562_FBgn0015571_-	GAGGTGGGA	TTCTTAACAACTTCTTTCAGTAC	4.3	5.35	60
X_21117412_21117462_FBgn0031161_+	CG15445	0.22	0.23	0.49	0.51	2.22	0.275	0.001649	0.58	0.63	0.8	0.79	1.31	0.19	0.017533	49.02	2.22	1.31	0.275	X_21117412_21117462_FBgn0031161_+	ATAGTAAAT	GACGCGTCAGTTTCAGCCAGTTC	0.5	-5.83	50
X_4798042_4798098_FBgn0029728_-	CG2861	0.51	0.45	0.78	0.72	1.56	0.27	0.023813	0.5	0.47	0.74	0.78	1.57	0.275	0.008163	40.35	1.57	1.56	0.275	X_4798042_4798098_FBgn0029728_-	CCTGTAAGA	ATCCACCAAATTATCCACAGAAT	4.07	6.02	56
2L_22054118_22054171_FBgn0085202_-	CG34173	0.01	0.02	0.25	0.32	19	0.27	0.016718	0.01	0.01	0.24	0.27	25.5	0.245	0.003727	38.89	25.5	19	0.27	2L_22054118_22054171_FBgn0085202_-	TATGTAAGT	AGCTCTGCGTACATCTGCAGTCA	6.69	4.06	53
2L_8212693_8212766_FBgn0032000_-	CG8372	0.26	0.28	0.6	0.48	2	0.27	0.047191	0.26	0.23	0.49	0.45	1.92	0.225	0.012122	43.24	2	1.92	0.27	2L_8212693_8212766_FBgn0032000_-	ACCGTGAGT	ATAATGTCGACAAACCCAAGTCC	9.4	-3.47	73
2R_14244070_14244127_FBgn0033917_+	SmydA-1	0	0	0.25	0.2	NA	0.225	0.012122	0	0	0.25	0.29	NA	0.27	0.005442	48.28	0	0	0.27	2R_14244070_14244127_FBgn0033917_+	AAGGTACTG	TAACCTCAACCCTCTTACAGATC	8.56	9.55	57
2R_23247726_23247777_FBgn0034837_-	RpL22-like	0.12	0.15	0.37	0.44	3	0.27	0.019316	0.1	0.12	0.28	0.33	2.77	0.195	0.018538	32.69	3	2.77	0.27	2R_23247726_23247777_FBgn0034837_-	GGAGTAAGT	GCTCATGTTTTGCCATATAGGAA	8.57	7.23	51
2R_24603077_24603137_FBgn0035034_+	CG3565	0.02	0.02	0.26	0.27	13.25	0.245	0.000416	0.03	0.03	0.3	0.3	10	0.27	0	47.54	13.25	10	0.27	2R_24603077_24603137_FBgn0035034_+	TTGGTGAGG	CACATTTCGCATTCCTTCAGGAC	6.9	9.13	60
3L_17755574_17755632_FBgn0043025_-	Adgf-A2	0	0	0.26	0.28	NA	0.27	0.001369	0.01	0.01	0.26	0.27	26.5	0.255	0.000384	32.2	26.5	26.5	0.27	3L_17755574_17755632_FBgn0043025_-	AAGGTAGTC	TTAAACTTCATCATCGACAGTTG	5.64	5.66	58
3L_20970004_20970053_FBgn0053287_-	CG33287	0.04	0.02	0.3	0.3	10	0.27	0.001369	0.03	0.01	0.24	0.26	12.5	0.23	0.003759	42	12.5	10	0.27	3L_20970004_20970053_FBgn0053287_-	GAAGTGGGT	ATCCAATGAGCTACTCACAGGTC	2.85	-1.28	49
3L_3198867_3198992_FBgn0047135_-	CG32276	0.07	0.07	0.34	0.34	4.86	0.27	0	0.08	0.06	0.25	0.25	3.57	0.18	0.003072	42.86	4.86	3.57	0.27	3L_3198867_3198992_FBgn0047135_-	AAGGTACGC	AATTCATTTGCGAATTTCAGTGA	10.4	3.83	125
3L_74392_74453_FBgn0035097_-	CG13405	0.29	0.29	0.43	0.44	1.5	0.145	0.001187	0.48	0.55	0.8	0.77	1.52	0.27	0.019316	29.03	1.52	1.5	0.27	3L_74392_74453_FBgn0035097_-	CAAGTAAAT	CTGCCTAGCACTTCTTTTAGCTG	4.44	2.96	61
3R_11629721_11629783_FBgn0037924_+	CG14712	0	0	0.22	0.32	NA	0.27	0.032625	0	0	0.18	0.26	NA	0.22	0.031504	42.86	0	0	0.27	3R_11629721_11629783_FBgn0037924_+	GAAGTAAGT	TACACTTGGCTTGCTTTCAGGAT	9.82	8.08	62
3R_14791253_14793442_FBgn0263929_+	jvl	0.34	0.29	0.48	0.52	1.59	0.185	0.028667	0.13	0.11	0.45	0.33	3.25	0.27	0.047191	32.28	3.25	1.59	0.27	3R_14791253_14793442_FBgn0263929_+	AAGGTACGC	TAAAACCATTGTGAAAACAGATA	10.4	1.66	2189
3R_9256016_9256071_FBgn0037667_+	CG16734	0.05	0.07	0.27	0.39	5.5	0.27	0.047191	0.08	0.14	0.32	0.36	3.09	0.23	0.023704	33.93	5.5	3.09	0.27	3R_9256016_9256071_FBgn0037667_+	ACGGTGTGT	AAATATGATGGCAACTTTAGTGG	6.96	-0.86	55
X_16741858_16741903_FBgn0052568_+	CG32568	0.03	0.01	0.23	0.35	14.5	0.27	0.047191	0.04	0.03	0.23	0.34	8.14	0.25	0.045496	30.43	14.5	8.14	0.27	X_16741858_16741903_FBgn0052568_+	AAGGTAAGA	TATTAATAATTACCTTTCAGATA	10.57	7.19	45
X_18652788_18652863_FBgn0030945_-	Ing3	0.01	0	0.25	0.3	55	0.27	0.008799	0.01	0.01	0.21	0.29	25	0.24	0.026671	50	55	25	0.27	X_18652788_18652863_FBgn0030945_-	AGAGTAAGT	CTGCTCCTTGCGGTGCACAGACA	9.35	5.8	75
X_2599719_2599778_FBgn0011606_-	Klp3A	0.17	0.14	0.37	0.42	2.55	0.24	0.014438	0.18	0.14	0.41	0.45	2.69	0.27	0.010797	41.67	2.69	2.55	0.27	X_2599719_2599778_FBgn0011606_-	TAAGTGGGC	CATTCGATTTCATTTCGCAGGAT	-0.93	8.45	59
X_3435663_3435712_FBgn0029658_-	CG14269	1.21	1.23	1.45	1.53	1.22	0.27	0.022534	0.75	0.74	0.82	0.83	1.11	0.08	0.007722	34	1.22	1.11	0.27	X_3435663_3435712_FBgn0029658_-	AGGGTCAGT	CTAATTGAATTGAAAACTAGTTA	5.85	-0.31	49
2R_7428092_7428150_FBgn0033168_-	CG11145	0.64	0.67	0.86	0.89	1.34	0.22	0.00917	0.8	0.85	1.1	1.08	1.32	0.265	0.010167	47.46	1.34	1.32	0.265	2R_7428092_7428150_FBgn0033168_-	CCTGTTCGT	AACCGCCATATCTTCGACAGTCG	-7.34	4.46	58
3L_147884_147935_FBgn0035099_+	CG6845	0	0	0.25	0.23	NA	0.24	0.001732	0.02	0	0.22	0.33	27.5	0.265	0.041734	36.54	27.5	27.5	0.265	3L_147884_147935_FBgn0035099_+	AAGGTAAGG	TTACAATGATTTCATTGCAGCTT	10.51	6.72	51
3L_15144536_15144668_FBgn0036484_+	Pex3	0.17	0.19	0.44	0.45	2.47	0.265	0.001775	0.02	0.03	0.15	0.17	6.4	0.135	0.006789	53.38	6.4	2.47	0.265	3L_15144536_15144668_FBgn0036484_+	TAGGTGAGC	TATTTATTAACCTCGAACAGGTC	7.96	6.12	132
3L_22850373_22852410_FBgn0263345_+	CR43426	0.26	0.25	0.52	0.52	2.04	0.265	0.000356	0.65	0.66	0.75	0.77	1.16	0.105	0.011149	40.68	2.04	1.16	0.265	3L_22850373_22852410_FBgn0263345_+	CAAGCAAGT	TTATCATTTTTCGCCTTCAGATT	2.32	11.46	2037
3L_7068999_7069050_FBgn0052391_-	CG32391	0.04	0.06	0.32	0.28	6	0.25	0.007905	0.02	0.06	0.32	0.29	7.62	0.265	0.008783	21.15	7.62	6	0.265	3L_7068999_7069050_FBgn0052391_-	GCAGTAAGA	ATTTATGTAATTACTACTAGCGA	4.95	3.18	51
3L_9893655_9893708_FBgn0036056_-	CG6709	0.02	0.02	0.3	0.27	14.25	0.265	0.003189	0.02	0.01	0.28	0.25	17.67	0.25	0.003976	35.19	17.67	14.25	0.265	3L_9893655_9893708_FBgn0036056_-	CAGGTATGA	TTTCATCTAAATGATGCCAGGTC	9.46	4.8	53
3L_9893655_9893708_FBgn0036057_-	CG14164	0.02	0.02	0.3	0.27	14.25	0.265	0.003189	0.02	0.01	0.28	0.25	17.67	0.25	0.003976	35.19	17.67	14.25	0.265	3L_9893655_9893708_FBgn0036057_-	CAGGTATGA	TTTCATCTAAATGATGCCAGGTC	9.46	4.8	53
3R_11953056_11953112_FBgn0051211_+	CG31211	0.19	0.18	0.4	0.5	2.43	0.265	0.034126	0.27	0.24	0.46	0.54	1.96	0.245	0.029084	36.84	2.43	1.96	0.265	3R_11953056_11953112_FBgn0051211_+	ATGGTATAG	CATACATTGCCATCATTTAGGCA	2.86	5.61	56
3R_23260042_23260101_FBgn0039068_+	CG13827	0	0	0.22	0.31	NA	0.265	0.027646	0	0	0.2	0.25	NA	0.225	0.012122	30	0	0	0.265	3R_23260042_23260101_FBgn0039068_+	GAGGTACAG	AATTAAATTGCATCTTCTAGGAC	6.62	6.81	59
3R_30695865_30695926_FBgn0000274_-	Pka-C2	0.02	0	0.26	0.25	25.5	0.245	0.002076	0.01	0	0.29	0.25	54	0.265	0.005998	58.06	54	25.5	0.265	3R_30695865_30695926_FBgn0000274_-	GCGGTGAGT	CTCATGCCACCCCTTCTCAGTTT	10.49	6.32	61
X_15889965_15890031_FBgn0030703_-	MSBP	0.88	0.81	1.08	1.14	1.31	0.265	0.028952	0.56	0.54	0.64	0.66	1.18	0.1	0.019419	40.3	1.31	1.18	0.265	X_15889965_15890031_FBgn0030703_-	ACAGTAAGT	ATGAAATCATTGTTGCGCAGCAA	9.49	2.6	66
X_7586011_7586070_FBgn0029952_-	CG12689	0	0	0.26	0.27	NA	0.265	0.000356	0	0	0.23	0.24	NA	0.235	0.000452	21.67	0	0	0.265	X_7586011_7586070_FBgn0029952_-	TCGGTAAGT	TATTATATTTGAAATTCAAGAGT	11.78	0.91	59
2L_12923706_12923765_FBgn0040510_+	ACXA	0.07	0.06	0.31	0.32	4.85	0.25	0.000799	0	0	0.26	0.26	NA	0.26	0	25	4.85	4.85	0.26	2L_12923706_12923765_FBgn0040510_+	TTAGTGAGT	ATTTTTTTGTATGCCCAAAGATG	5.79	5.88	59
2L_15258442_15258503_FBgn0045842_-	yuri	0.01	0.01	0.24	0.3	27	0.26	0.013053	0.02	0.02	0.27	0.28	13.75	0.255	0.000384	43.55	27	13.75	0.26	2L_15258442_15258503_FBgn0045842_-	GAGGTGGCG	TGAGGTATTATGAATTTCAGCGC	0.4	3.28	61
2L_6745108_6745162_FBgn0051910_-	CG31910	0.01	0.01	0.2	0.24	22	0.21	0.008949	0.01	0.01	0.25	0.29	27	0.26	0.005865	36.36	27	22	0.26	2L_6745108_6745162_FBgn0051910_-	AAAGTGAGT	ACATTGCGCTTCTCTTTTAGCAA	8.4	8.53	54
2R_6993056_6993120_FBgn0050159_+	CG30159	0.59	0.67	0.84	0.84	1.33	0.21	0.034419	0.5	0.46	0.7	0.78	1.54	0.26	0.028334	56.92	1.54	1.33	0.26	2R_6993056_6993120_FBgn0050159_+	GTGGTAAAG	AACCAGCGACCACTTTCCAGTTA	3.86	0.58	64
3L_2139943_2140057_FBgn0052311_-	zormin	0	0	0.31	0.21	NA	0.26	0.035049	0	0.03	0.12	0.16	9.33	0.125	0.03775	37.39	9.33	9.33	0.26	3L_2139943_2140057_FBgn0052311_-	CAGGTGGGT	TCACCTTGATTACCCCTTAGATA	8.56	5.97	114
3L_3460629_3460706_FBgn0026259_-	eIF5B	0.36	0.36	0.6	0.64	1.72	0.26	0.005865	0.46	0.43	0.68	0.72	1.57	0.255	0.009475	28.21	1.72	1.57	0.26	3L_3460629_3460706_FBgn0026259_-	AAGGTGTAT	CGCTCAACTGGATATTACAGGGT	2.71	3.4	77
3R_10240314_10240375_FBgn0261928_+	CG42795	0.01	0.03	0.3	0.26	14	0.26	0.007315	0.04	0.03	0.26	0.32	8.29	0.255	0.013929	50	14	8.29	0.26	3R_10240314_10240375_FBgn0261928_+	AAGGTGAGC	AATGACTCGTCTTCGTTTAGGAC	9.6	7.43	61
3R_11115534_11115586_FBgn0037860_-	CG6629	0.03	0.03	0.28	0.3	9.67	0.26	0.001476	0.01	0.01	0.22	0.26	24	0.23	0.007477	41.51	24	9.67	0.26	3R_11115534_11115586_FBgn0037860_-	TTGGTGAGT	GCTCATTTCGTCCTTTTTAGTCG	9.27	7.44	52
3R_16203951_16204007_FBgn0051287_+	CG31287	0.02	0.01	0.26	0.25	17	0.24	0.000867	0.03	0.01	0.28	0.28	14	0.26	0.001476	29.82	17	14	0.26	3R_16203951_16204007_FBgn0051287_+	TTGGTATGA	TAAAGTGAGTGTATCAACAGGTA	5.24	1.12	56
3R_18667158_18667221_FBgn0051231_+	CG31231	0.01	0	0.24	0.29	53	0.26	0.009479	0.05	0.03	0.26	0.3	7	0.24	0.008569	29.69	53	7	0.26	3R_18667158_18667221_FBgn0051231_+	AGGGTAAAT	CCTGCGTATAAATTGTATAGAAA	5.83	3.3	63
3R_24856900_24856954_FBgn0039235_-	CG10899	0.02	0.01	0.29	0.26	18.33	0.26	0.003678	0.03	0.02	0.26	0.25	10.2	0.23	0.000944	41.82	18.33	10.2	0.26	3R_24856900_24856954_FBgn0039235_-	GAGGTAGGA	CCATCTTATTTCCATTGAAGGAT	8.24	7.95	54
2L_10729103_10729180_FBgn0032290_+	CG6443	0.02	0.04	0.27	0.3	9.5	0.255	0.004961	0.03	0.06	0.3	0.28	6.44	0.245	0.005371	25.64	9.5	6.44	0.255	2L_10729103_10729180_FBgn0032290_+	AAAGTAAGT	TTGTAAATCGCATATTATAGTTT	9.72	2.77	77
2L_11518953_11519009_FBgn0032364_+	CG4970	0.05	0.06	0.33	0.29	5.64	0.255	0.006473	0.04	0.04	0.32	0.25	7.13	0.245	0.019804	22.81	7.13	5.64	0.255	2L_11518953_11519009_FBgn0032364_+	TTTGTGAGT	CACTTTTATTGTTTAATTAGGTA	5.91	7.3	56
2L_14352346_14352397_FBgn0262354_+	CG43052	0.09	0.04	0.32	0.29	4.69	0.24	0.014438	0.1	0.07	0.35	0.33	4	0.255	0.004961	32.69	4.69	4	0.255	2L_14352346_14352397_FBgn0262354_+	ATGGTAATA	TAAAATGTGTACTCTTGAAGCTG	5.05	4.57	51
2L_17524883_17524947_FBgn0013810_+	Dhc36C	0.02	0	0.25	0.28	26.5	0.255	0.004961	0.03	0.01	0.21	0.23	11	0.2	0.004963	26.15	26.5	11	0.255	2L_17524883_17524947_FBgn0013810_+	CAGGTAAGT	GTTTTTAACTTTTATTGTAGCAC	10.86	6.81	64
2L_2770192_2770258_FBgn0031459_+	CG2862	0.19	0.15	0.39	0.46	2.5	0.255	0.024091	0.19	0.19	0.38	0.4	2.05	0.2	0.002491	40.3	2.5	2.05	0.255	2L_2770192_2770258_FBgn0031459_+	CAGGTGAGT	ATACTGTATTTACGCTGCAGCTC	10.67	5.78	66
2L_3318910_3318969_FBgn0031519_-	Fign	0.02	0	0.22	0.28	25	0.24	0.016922	0.02	0	0.26	0.27	26.5	0.255	0.001917	38.33	26.5	25	0.255	2L_3318910_3318969_FBgn0031519_-	CTCGTGAGA	TTGTATCCAATTCCCTACAGACG	3.24	7.96	59
2L_4883588_4883645_FBgn0031643_+	CG3008	0.06	0.04	0.27	0.34	6.1	0.255	0.019774	0.05	0.04	0.26	0.27	5.89	0.22	0.001031	39.66	6.1	5.89	0.255	2L_4883588_4883645_FBgn0031643_+	TAGGTTTGT	ACTCTCTTTCGATTGTGCAGAAT	4.07	7.74	57
2R_15368434_15368485_FBgn0011660_-	Pms2	0	0	0.23	0.2	NA	0.215	0.004832	0.01	0.01	0.28	0.25	26.5	0.255	0.003442	25	26.5	26.5	0.255	2R_15368434_15368485_FBgn0011660_-	TGGGTATGT	GCAAATTCTCAGTTTTATAGAAC	7.43	-0.11	51
2R_24874301_24874359_FBgn0035073_-	CG16896	0.04	0.03	0.32	0.26	8.29	0.255	0.013929	0.03	0.02	0.28	0.22	10	0.225	0.017786	50.85	10	8.29	0.255	2R_24874301_24874359_FBgn0035073_-	TGGGTGAGT	ACGAAGTTTGCGAATTCCAGGAA	8.73	2.62	58
3L_6603894_6603962_FBgn0035707_+	CG8368	0.01	0.01	0.25	0.28	26.5	0.255	0.003442	0.02	0.01	0.25	0.29	18	0.255	0.006473	50.72	26.5	18	0.255	3L_6603894_6603962_FBgn0035707_+	AATGTAAGT	GTTTTCCCATGAACCCACAGAAC	8.62	8.75	68
3R_22611804_22611862_FBgn0051156_-	CG31156	0.02	0.04	0.22	0.2	7	0.18	0.006116	0.02	0.02	0.32	0.23	13.75	0.255	0.029759	25.42	13.75	7	0.255	3R_22611804_22611862_FBgn0051156_-	AGTGTAAGA	TAATTAATTACTTATTACAGTGC	4.57	3.46	58
X_11581041_11581104_FBgn0002948_+	nod	0	0	0.27	0.2	NA	0.235	0.02147	0	0	0.31	0.2	NA	0.255	0.043507	51.56	0	0	0.255	X_11581041_11581104_FBgn0002948_+	AAGGTATGT	ACCGCCATCTCGCTTTGTAGTCG	9.79	7.24	63
X_8077681_8077743_FBgn0029993_+	CG1571	0.04	0.06	0.31	0.27	5.8	0.24	0.008569	0.04	0.05	0.31	0.29	6.67	0.255	0.001917	33.33	6.67	5.8	0.255	X_8077681_8077743_FBgn0029993_+	GCCGTAAGA	AACACTATATCTTCTGGAAGATG	5.75	2.3	62
X_8169421_8169489_FBgn0030017_-	CG2278	0	0	0.22	0.29	NA	0.255	0.018323	0	0	0.21	0.14	NA	0.175	0.03775	42.03	0	0	0.255	X_8169421_8169489_FBgn0030017_-	AAGGTAAGT	ACTCTATTCCTGCCCCCCAGATT	11	9.05	68
2L_10381111_10381162_FBgn0032234_+	gny	0.03	0	0.24	0.21	15	0.21	0.010051	0.03	0	0.29	0.24	17.67	0.25	0.013329	26.92	17.67	15	0.25	2L_10381111_10381162_FBgn0032234_+	AAAGTAAGA	TGTAATGTAACAAATTGTAGGAA	6.91	4.95	51
2L_9328355_9328412_FBgn0032109_+	CG17005	0.01	0	0.25	0.24	49	0.24	0.000867	0.01	0	0.26	0.25	51	0.25	0.000799	34.48	51	49	0.25	2L_9328355_9328412_FBgn0032109_+	TCAGTAAGT	AATATGATTCCATTATTCAGCAC	9.14	3.32	57
2R_11861466_11861515_FBgn0085259_+	CG34230	0.03	0.02	0.26	0.29	11	0.25	0.003976	0.02	0.01	0.22	0.22	14.67	0.205	0.000594	42	14.67	11	0.25	2R_11861466_11861515_FBgn0085259_+	ATCGTGAGT	GATATAACTGGCTTTCTTAGGTG	8.88	6.23	49
2R_21677857_21677924_FBgn0050263_+	stum	0	0	0.25	0.25	NA	0.25	0	0	0	0.2	0.18	NA	0.19	0.002759	32.35	0	0	0.25	2R_21677857_21677924_FBgn0050263_+	TAGGTAAGG	AGTTTTTCTGTCCCCTCTAGAGT	9.31	9.05	67
3L_11991085_11991141_FBgn0036236_+	CG6931	0.01	0	0.24	0.27	51	0.25	0.003976	0.01	0	0.24	0.19	43	0.21	0.014421	45.61	51	43	0.25	3L_11991085_11991141_FBgn0036236_+	CTCGTGAGT	ATATATCGCTTTGATTCCAGCCA	8.41	3.47	56
3L_1805459_1805530_FBgn0261562_+	CG42676	0	0	0.27	0.23	NA	0.25	0.006339	0.08	0	0.25	0.25	6.25	0.21	0.034419	40.28	6.25	6.25	0.25	3L_1805459_1805530_FBgn0261562_+	GAGGTGTGT	GACCTGCCTTATTATTTCAGGAG	6.14	8.21	71
3L_19817550_19817616_FBgn0036911_-	Fibp	0	0.04	0.28	0.26	13.5	0.25	0.007905	0	0.02	0.21	0.21	21	0.2	0.002491	35.82	21	13.5	0.25	3L_19817550_19817616_FBgn0036911_-	CCTGTAAGT	CCATCGATTTACAATTATAGCCA	7.52	4.62	66
3L_19950937_19951002_FBgn0052219_-	CG32219	0	0	0.26	0.24	NA	0.25	0.001596	0.01	0.01	0.21	0.21	21	0.2	0	21.21	21	21	0.25	3L_19950937_19951002_FBgn0052219_-	ATTGTAAGT	TTTTTTTATTGATTTTAAAGCGG	8.54	6.44	65
3L_20242668_20242784_FBgn0024814_+	Clc	0.05	0.04	0.31	0.28	6.56	0.25	0.003976	0.06	0.05	0.28	0.25	4.82	0.21	0.005621	52.99	6.56	4.82	0.25	3L_20242668_20242784_FBgn0024814_+	GAGGTGCGT	AGCAATCACAACATTTCCAGAGA	8.42	1.58	116
3R_24658605_24658660_FBgn0039215_+	CG6695	0.01	0.01	0.2	0.27	23.5	0.225	0.023353	0.01	0.02	0.23	0.3	17.67	0.25	0.019419	50	23.5	17.67	0.25	3R_24658605_24658660_FBgn0039215_+	AAGGTGGGT	TCACATTTACATATTCACAGGCG	8.23	6.2	55
3R_24856697_24856748_FBgn0039235_-	CG10899	0.01	0.01	0.24	0.24	24	0.23	0	0.01	0.01	0.27	0.25	26	0.25	0.001596	30.77	26	24	0.25	3R_24856697_24856748_FBgn0039235_-	AAGGTGAGA	TTCATACATATATGTTTTAGGTT	8.68	9.01	51
3R_29942698_29942759_FBgn0039727_+	Vps13B	0.01	0	0.24	0.23	47	0.23	0.000944	0	0	0.24	0.26	NA	0.25	0.001596	27.42	47	47	0.25	3R_29942698_29942759_FBgn0039727_+	CCAGTAAGT	ATGTCGTTGTATGCGAAAAGGTA	9.09	2.37	61
3R_30128329_30128388_FBgn0051025_-	Ppi1	0	0	0.24	0.26	NA	0.25	0.001596	0	0	0.22	0.25	NA	0.235	0.00405	45	0	0	0.25	3R_30128329_30128388_FBgn0051025_-	TCGGTAAGT	ACTCACATAATCCTCTCCAGCAC	11.78	4.55	59
X_19615106_19615183_FBgn0031038_+	Tyler	0.67	0.74	0.95	0.96	1.35	0.25	0.019419	0.69	0.68	0.87	0.86	1.26	0.18	0.00154	52.56	1.35	1.26	0.25	X_19615106_19615183_FBgn0031038_+	CAGGTAGGC	TTCGGTTTGCATTACGGCAGATA	9.88	5.15	77
X_19615106_19615183_FBgn0031039_+	Shawn	0.67	0.74	0.95	0.96	1.35	0.25	0.019419	0.69	0.68	0.87	0.86	1.26	0.18	0.00154	52.56	1.35	1.26	0.25	X_19615106_19615183_FBgn0031039_+	CAGGTAGGC	TTCGGTTTGCATTACGGCAGATA	9.88	5.15	77
X_2181348_2181415_FBgn0003116_+	pn	0.04	0.05	0.3	0.29	6.56	0.25	0.000799	0.05	0.03	0.23	0.21	5.5	0.18	0.006116	47.06	6.56	5.5	0.25	X_2181348_2181415_FBgn0003116_+	CGGGTGAGA	GGGTTTCTCTTCTCGCGCAGCAT	7.62	7.29	67
2L_3269850_3269912_FBgn0031513_+	CG3347	0.01	0.08	0.29	0.29	6.44	0.245	0.019804	0.02	0.07	0.31	0.26	6.33	0.24	0.02102	28.57	6.44	6.33	0.245	2L_3269850_3269912_FBgn0031513_+	GGTGTAAGT	CACATAATAATAATAATCAGGAA	8.07	2.48	62
2R_13443693_13443752_FBgn0013765_-	cnn	0.2	0.17	0.47	0.39	2.32	0.245	0.029084	0.2	0.17	0.46	0.39	2.3	0.24	0.024261	53.33	2.32	2.3	0.245	2R_13443693_13443752_FBgn0013765_-	CAGGTGAAG	TAAAACGTCGTCGTCCACAGCTG	6.66	8.84	59
2R_17669633_17669686_FBgn0050108_+	CG30108	0.04	0.06	0.25	0.34	5.9	0.245	0.033626	0.06	0.06	0.28	0.3	4.83	0.23	0.001885	51.85	5.9	4.83	0.245	2R_17669633_17669686_FBgn0050108_+	AAGGTGAGC	GACCAACCTGTAATCCCCAGCGC	9.6	4.93	53
2R_18288389_18289534_FBgn0010575_-	--	0	0.03	0.3	0.22	17.33	0.245	0.029084	0	0	0.05	0.08	NA	0.065	0.049346	37.43	17.33	17.33	0.245	2R_18288389_18289534_FBgn0010575_-	AAGGTAAGC	TTTTTTTTGTGCAATCGCAGGTG	10.22	7.99	1145
2R_19446140_19446217_FBgn0266711_-	EloC	0.14	0.11	0.39	0.35	2.96	0.245	0.010252	0.15	0.13	0.36	0.33	2.46	0.205	0.007645	43.59	2.96	2.46	0.245	2R_19446140_19446217_FBgn0266711_-	CAAGTAAGA	ATTTGCCGCCCCCAACTCAGATG	7.61	5.72	77
2R_23283854_23283911_FBgn0034840_-	CG3124	0	0	0.16	0.17	NA	0.165	0.000917	0.01	0.01	0.25	0.26	25.5	0.245	0.000416	34.48	25.5	25.5	0.245	2R_23283854_23283911_FBgn0034840_-	AAGGTACAC	AGTCTAAGTCTATATTTCAGATG	7.56	3.23	57
2R_23969533_23969595_FBgn0034945_-	CG10904	0.1	0.05	0.28	0.34	4.13	0.235	0.026521	0.1	0.04	0.28	0.35	4.5	0.245	0.033626	39.68	4.5	4.13	0.245	2R_23969533_23969595_FBgn0034945_-	AAGGTGGGC	TCTATCCTGGTTTTTGGTAGAAA	7.93	5.05	62
2R_23976088_23976147_FBgn0034948_-	PPP1R15	0.01	0.02	0.23	0.29	17.33	0.245	0.015063	0.01	0.02	0.22	0.27	16.33	0.23	0.012065	40	17.33	16.33	0.245	2R_23976088_23976147_FBgn0034948_-	AAGGTGAAG	TTTCCTATTTATGCGCACAGGTT	5.73	7.43	59
2R_7151853_7151918_FBgn0024293_-	Spn43Ab	0.04	0.01	0.26	0.28	10.8	0.245	0.005371	0.01	0	0.22	0.25	47	0.23	0.004693	46.97	47	10.8	0.245	2R_7151853_7151918_FBgn0024293_-	GATGTGAGT	ACCTTTCTTCCGAAATCCAGTGC	7.77	4.9	65
2R_8708571_8708626_FBgn0033324_-	CG14744	0.04	0.02	0.31	0.24	9.17	0.245	0.021369	0.09	0.04	0.29	0.24	4.08	0.2	0.029857	35.71	9.17	4.08	0.245	2R_8708571_8708626_FBgn0033324_-	TAGGTAGGA	TCTTTAAAACCTACTTTCAGTGC	7	6.74	55
3L_1254325_1254397_FBgn0035197_+	CG9130	0.02	0.02	0.25	0.27	13	0.24	0.001732	0.02	0.02	0.25	0.28	13.25	0.245	0.003727	52.05	13.25	13	0.245	3L_1254325_1254397_FBgn0035197_+	AGAGTAAGT	CTTCCAATTGGTATCCTCAGATG	9.35	6.99	72
3L_1254325_1254397_FBgn0035198_+	CG9133	0.02	0.02	0.25	0.27	13	0.24	0.001732	0.02	0.02	0.25	0.28	13.25	0.245	0.003727	52.05	13.25	13	0.245	3L_1254325_1254397_FBgn0035198_+	AGAGTAAGT	CTTCCAATTGGTATCCTCAGATG	9.35	6.99	72
3L_17759883_17759967_FBgn0052181_+	CG32181	0	0.01	0.2	0.2	40	0.195	0.000657	0.06	0.05	0.29	0.31	5.45	0.245	0.002076	32.94	40	5.45	0.245	3L_17759883_17759967_FBgn0052181_+	TTTGTAAGT	ATGGATGGATGGATTGTTAGGAA	7.4	-0.47	84
3L_8416524_8416584_FBgn0052354_-	CG32354	0	0	0.29	0.2	NA	0.245	0.032119	0	0	0.17	0.25	NA	0.21	0.034419	40.98	0	0	0.245	3L_8416524_8416584_FBgn0052354_-	CCTGTGAGT	GCTCTTCAACTTCTTTTCAGACG	7.21	7.27	60
3L_9006297_9006363_FBgn0035954_+	Doc3	0	0	0.2	0.29	NA	0.245	0.032119	0	0	0.18	0.25	NA	0.215	0.025492	44.78	0	0	0.245	3L_9006297_9006363_FBgn0035954_+	CAGGTGCGT	CCTCTTGTTTGCATTTGCAGAAT	9.73	9.85	66
3L_9888457_9888519_FBgn0011836_-	Taf2	0.02	0.05	0.28	0.28	8	0.245	0.003727	0.02	0.04	0.26	0.24	8.33	0.22	0.004107	36.51	8.33	8	0.245	3L_9888457_9888519_FBgn0011836_-	ATTATAAGT	TTCTCCCTTTTGAATAGCACGGC	0.36	-3.39	62
3R_13076306_13076393_FBgn0004666_+	sim	0	0	0.2	0.29	NA	0.245	0.032119	0	0	0.14	0.2	NA	0.17	0.029759	35.23	0	0	0.245	3R_13076306_13076393_FBgn0004666_+	TCCGTAAGT	TCTTCTCTCCCTATCAATAGTGC	10.27	8.66	87
3R_18666993_18667060_FBgn0051231_+	CG31231	0.01	0.01	0.21	0.3	25.5	0.245	0.032119	0.02	0.01	0.21	0.3	17	0.24	0.033796	38.24	25.5	17	0.245	3R_18666993_18667060_FBgn0051231_+	GAGGTAAGG	AGTATATTCTTCTCTCGCAGAAA	10.28	8.26	67
3R_20139543_20139623_FBgn0262025_-	CR42836	0.02	0	0.3	0.21	25.5	0.245	0.033626	0.01	0.01	0.28	0.19	23.5	0.225	0.03775	25.93	25.5	23.5	0.245	3R_20139543_20139623_FBgn0262025_-	AAGGTACTA	ATGTCATATTCGATTTTCAGTAT	7.52	6.56	80
3R_22378155_22378216_FBgn0038953_+	CG18596	0.05	0.03	0.29	0.23	6.5	0.22	0.020042	0.11	0.07	0.34	0.33	3.72	0.245	0.007006	27.42	6.5	3.72	0.245	3R_22378155_22378216_FBgn0038953_+	ACGGCAAGA	CGTTAATAATAACTCCGCAGCAT	2.9	3.51	61
3R_31591142_31591201_FBgn0039855_+	CG1638	0.03	0.02	0.24	0.21	9	0.2	0.006192	0.05	0.04	0.29	0.29	6.44	0.245	0.000416	38.33	9	6.44	0.245	3R_31591142_31591201_FBgn0039855_+	CCGGTACCA	GTCTGCTTAATTCTTCGTAGCTT	4.7	6	59
3R_4318289_4318347_FBgn0261086_-	Syt14	0.03	0	0.19	0.28	15.67	0.22	0.043478	0.03	0	0.21	0.31	17.33	0.245	0.042523	52.54	17.33	15.67	0.245	3R_4318289_4318347_FBgn0261086_-	TCAGTGAGT	AACTTTTAAGTATCCCGCAGCCC	7.68	2.45	58
3R_9246943_9247244_FBgn0037664_+	CG8420	0.13	0.11	0.26	0.24	2.08	0.13	0.011628	0.09	0.1	0.3	0.38	3.58	0.245	0.02602	31.79	3.58	2.08	0.245	3R_9246943_9247244_FBgn0037664_+	TAGGTGGGT	TCTCGTTTTTTTTTCTGAAGACG	5.56	5.93	301
2L_20735091_20735252_FBgn0262743_+	Fs(2)Ket	0.02	0.02	0.26	0.24	12.5	0.23	0.001885	0.05	0.04	0.24	0.33	6.33	0.24	0.033796	43.21	12.5	6.33	0.24	2L_20735091_20735252_FBgn0262743_+	AATGTGAGT	TTTGTCTCCACCATTTGCAGCCG	7.8	8.31	161
2L_2882834_2882919_FBgn0024947_-	NTPase	0.45	0.4	0.61	0.64	1.47	0.2	0.020596	0.09	0.11	0.29	0.39	3.4	0.24	0.042296	40.7	3.4	1.47	0.24	2L_2882834_2882919_FBgn0024947_-	CTGGTAGAC	TTTGTCTTTCGCCTTTTCAGCTG	1.51	11.22	85
2R_10143671_10143729_FBgn0033491_+	CG18011	0.08	0.05	0.28	0.33	4.69	0.24	0.014438	0.06	0.04	0.25	0.31	5.6	0.23	0.018384	22.03	5.6	4.69	0.24	2R_10143671_10143729_FBgn0033491_+	TGAGTAATT	ATGATGCTTGTATTACCTAGAAT	0.85	5.08	58
2R_24881402_24881476_FBgn0263443_-	CR43466	0.1	0.13	0.34	0.37	3.09	0.24	0.007722	0.06	0.02	0.2	0.23	5.38	0.175	0.019804	22.67	5.38	3.09	0.24	2R_24881402_24881476_FBgn0263443_-	ATGGTATTT	CAACTTAAATATTTTCGCAGGCC	3.85	6.02	74
2R_8707652_8707720_FBgn0033324_-	CG14744	0.02	0.05	0.21	0.21	6	0.175	0.007267	0.03	0.04	0.26	0.29	7.86	0.24	0.004312	47.83	7.86	6	0.24	2R_8707652_8707720_FBgn0033324_-	CACGTAAGA	GTATCAACCTTCCTTCCTAGCTG	7.45	7.16	68
3L_12743978_12744036_FBgn0052112_+	CG32112	0.05	0.02	0.3	0.25	7.86	0.24	0.014438	0.04	0.02	0.26	0.23	8.17	0.215	0.006958	35.59	8.17	7.86	0.24	3L_12743978_12744036_FBgn0052112_+	ACTGTAGGT	CATTATTCCATGTGTTACAGGGT	4.15	7.24	58
3L_148414_148461_FBgn0035099_+	CG6845	0.12	0.1	0.25	0.3	2.5	0.165	0.025611	0.1	0.1	0.33	0.35	3.4	0.24	0.001732	31.25	3.4	2.5	0.24	3L_148414_148461_FBgn0035099_+	GAAGTAAGA	TTCTAATGTATTCTCTCCAGCAA	6.42	6.93	47
3L_19910433_19910501_FBgn0036915_+	Prp3	1	1.05	1.24	1.29	1.23	0.24	0.02102	0.85	0.81	1.02	1.05	1.25	0.205	0.014548	36.23	1.25	1.23	0.24	3L_19910433_19910501_FBgn0036915_+	TTGGTAAAT	CGTCCATTATCACGCGCAAGGAT	4.94	-0.95	68
3L_361700_361752_FBgn0035137_+	CG1233	0.43	0.41	0.71	0.61	1.57	0.24	0.042296	0.4	0.42	0.6	0.55	1.4	0.165	0.025611	56.6	1.57	1.4	0.24	3L_361700_361752_FBgn0035137_+	CAGGTGAGC	ACACGCCGTGTGTCTTCCAGCTG	9.6	9.89	52
3L_7068407_7068470_FBgn0052391_-	CG32391	0.06	0.07	0.22	0.27	3.77	0.18	0.019478	0.06	0.07	0.28	0.33	4.69	0.24	0.011097	45.31	4.69	3.77	0.24	3L_7068407_7068470_FBgn0052391_-	ATGGTAAGC	TAACCACAAATCACTTGCAGTTC	9.26	5.05	63
3R_15363098_15363151_FBgn0026737_-	CG6171	0.48	0.49	0.7	0.75	1.49	0.24	0.011097	0.49	0.49	0.72	0.69	1.44	0.215	0.004832	44.44	1.49	1.44	0.24	3R_15363098_15363151_FBgn0026737_-	ATTGTAAGT	TTGGCTAAAGCCCATTGTAGTCA	8.54	-4.06	53
3R_22379605_22379665_FBgn0038953_+	CG18596	0.01	0.01	0.21	0.29	25	0.24	0.026671	0.02	0.02	0.18	0.24	10.5	0.19	0.024036	39.34	25	10.5	0.24	3R_22379605_22379665_FBgn0038953_+	GGGGTTCGT	TGTTCTGCATCCCTCCTCAGGCA	0.98	9.28	60
3R_23927935_23927995_FBgn0264740_-	CG43998	0.16	0.14	0.32	0.35	2.23	0.185	0.009363	0.08	0.06	0.29	0.33	4.43	0.24	0.008569	21.31	4.43	2.23	0.24	3R_23927935_23927995_FBgn0264740_-	AAAGTGTGA	ACAATTATTTGTTTTTATAGAAC	-1.44	7.62	60
3R_23927935_23927995_FBgn0264741_-	CG43999	0.16	0.14	0.32	0.35	2.23	0.185	0.009363	0.08	0.06	0.29	0.33	4.43	0.24	0.008569	21.31	4.43	2.23	0.24	3R_23927935_23927995_FBgn0264741_-	AAAGTGTGA	ACAATTATTTGTTTTTATAGAAC	-1.44	7.62	60
X_19193870_19193947_FBgn0030996_+	CG14194	0.13	0.11	0.32	0.35	2.79	0.215	0.006958	0.14	0.13	0.36	0.39	2.78	0.24	0.004312	51.28	2.79	2.78	0.24	X_19193870_19193947_FBgn0030996_+	CTGGTGAGA	TCGACCATGTTCCCTTTCAGCAA	7.54	7.34	77
X_22496314_22496367_FBgn0027279_+	l(1)G0196	0.01	0	0.21	0.28	49	0.24	0.02102	0.01	0	0.21	0.25	46	0.225	0.008291	44.44	49	46	0.24	X_22496314_22496367_FBgn0027279_+	ATAGTAAGT	TTCGATTAACCAAAGTGAAGCCA	8.65	-7.32	53
2L_1182105_1182169_FBgn0031319_+	CG4896	0.04	0.03	0.24	0.3	7.71	0.235	0.01634	0.06	0.04	0.25	0.28	5.3	0.215	0.006958	44.62	7.71	5.3	0.235	2L_1182105_1182169_FBgn0031319_+	GAGGTAGGA	ATGTCAATGTGTATCCACAGGCT	8.24	8.55	64
2L_13387114_13387176_FBgn0032516_-	Ing5	0.05	0.03	0.3	0.25	6.88	0.235	0.012875	0.03	0.02	0.27	0.23	10	0.225	0.008291	30.16	10	6.88	0.235	2L_13387114_13387176_FBgn0032516_-	ACGGTAAGA	TATTCACGATTTACAAACAGGAT	10.65	5.88	62
2L_19183462_19183511_FBgn0267726_-	CG46059	0	0	0.23	0.24	NA	0.235	0.000452	0	0	0.19	0.2	NA	0.195	0.000657	30	0	0	0.235	2L_19183462_19183511_FBgn0267726_-	AATGTAAGT	CAATCTAATTTGGTTTAAAGTCC	8.62	2.27	49
2R_13212933_13213022_FBgn0033807_-	AQP	0.14	0.15	0.32	0.34	2.28	0.185	0.003632	0.14	0.1	0.36	0.35	2.96	0.235	0.007608	55.56	2.96	2.28	0.235	2R_13212933_13213022_FBgn0033807_-	CAGGTGAGT	TAACTATGTCCTGCTTGCAGCCT	10.67	8.19	89
2R_21147971_21148029_FBgn0034595_-	CG15657	0.01	0.01	0.24	0.25	24.5	0.235	0.000452	0.01	0.01	0.23	0.26	24.5	0.235	0.00405	54.24	24.5	24.5	0.235	2R_21147971_21148029_FBgn0034595_-	AACGTAAGT	CGGCACGACCCGATCCACAGAGG	10.74	2.64	58
3L_18682378_18682438_FBgn0052202_+	CG32202	0.05	0.11	0.33	0.3	3.94	0.235	0.019769	0.09	0.08	0.25	0.29	3.18	0.185	0.012191	37.7	3.94	3.18	0.235	3L_18682378_18682438_FBgn0052202_+	GAGGTAACC	GTGCAGTACCTTTTATCCAGAGT	8.55	2.25	60
3L_20972994_20973189_FBgn0053286_-	CG33286	0.05	0.02	0.31	0.23	7.71	0.235	0.031494	0.03	0.01	0.2	0.27	11.75	0.215	0.027488	28.06	11.75	7.71	0.235	3L_20972994_20973189_FBgn0053286_-	GAAGTGAGT	TGTCCTTGCACCTCCTTTAGATA	7.97	8.66	195
3L_21554181_21554380_FBgn0037098_-	Wnk	0.4	0.43	0.6	0.63	1.48	0.2	0.011064	0.11	0.09	0.34	0.33	3.35	0.235	0.002256	53.5	3.35	1.48	0.235	3L_21554181_21554380_FBgn0037098_-	GCTGTAAGC	CGCCTTGCCTCTCGCTTCAGATT	4.47	9.86	199
3L_8197703_8197778_FBgn0035853_-	UbcE2M	0.06	0.05	0.29	0.29	5.27	0.235	0.000452	0.12	0.11	0.25	0.27	2.26	0.145	0.005893	43.42	5.27	2.26	0.235	3L_8197703_8197778_FBgn0035853_-	ACGGTAGGC	GCAACCTGTCCCTCAAGCAGCAA	8.81	2.72	75
3L_8197706_8197778_FBgn0035853_-	UbcE2M	0.06	0.05	0.29	0.29	5.27	0.235	0.000452	0.06	0.04	0.21	0.22	4.3	0.165	0.00456	42.47	5.27	4.3	0.235	3L_8197706_8197778_FBgn0035853_-	ACGGTAGGC	AATGCAACCTGTCCCTCAAGCAG	8.81	2.33	72
3L_8279210_8279275_FBgn0263219_+	Dscam4	0	0	0.22	0.25	NA	0.235	0.00405	0	0	0.14	0.2	NA	0.17	0.029759	24.24	0	0	0.235	3L_8279210_8279275_FBgn0263219_+	GAGGTAGGT	ATTAAAATTATATATTTTAGTGA	9.65	4.9	65
3R_24761329_24761389_FBgn0015591_-	AstA	0	0	0.19	0.25	NA	0.22	0.018092	0	0	0.19	0.28	NA	0.235	0.034767	44.26	0	0	0.235	3R_24761329_24761389_FBgn0015591_-	CTGGTAAGT	TTTAATCCTTGGGCTTGCAGTGC	10.65	6.28	60
3R_25482384_25482703_FBgn0039338_-	XNP	0.18	0.18	0.38	0.44	2.28	0.23	0.016591	0.54	0.44	0.73	0.72	1.48	0.235	0.042808	39.38	2.28	1.48	0.235	3R_25482384_25482703_FBgn0039338_-	CAGGTGAAC	CAAAATCGCATTTCTTGCAGATC	5.56	7.49	319
3R_27686407_27686466_FBgn0051055_-	CG31055	0.04	0.04	0.27	0.26	6.62	0.225	0.000493	0.04	0.02	0.26	0.27	8.83	0.235	0.002256	46.67	8.83	6.62	0.235	3R_27686407_27686466_FBgn0051055_-	CGAGTAGGT	ACATATTGTATGTCCCGCAGAAA	5.76	8.89	59
3R_29836833_29836888_FBgn0039707_+	Prtl99C	0.01	0	0.24	0.24	48	0.235	0.000452	0.01	0.01	0.24	0.23	23.5	0.225	0.000493	28.57	48	23.5	0.235	3R_29836833_29836888_FBgn0039707_+	AAGGTAAAT	CCAAAACGTATATTTAAAAGAAA	8.88	-0.38	55
3R_9752631_9752679_FBgn0037741_-	CG16908	0	0	0.24	0.18	NA	0.21	0.019804	0	0	0.22	0.25	NA	0.235	0.00405	24.49	0	0	0.235	3R_9752631_9752679_FBgn0037741_-	AAGGTGAGA	TGTACTATAATTTTTTTTAGCCC	8.68	5.78	48
X_13212393_13212449_FBgn0029133_+	REG	0.09	0.12	0.32	0.36	3.24	0.235	0.011129	0.07	0.1	0.21	0.24	2.65	0.14	0.022198	47.37	3.24	2.65	0.235	X_13212393_13212449_FBgn0029133_+	TCGGTAAGT	CCGACACAAGTCCCTAAAAGTCC	11.78	-5.91	56
X_13212393_13212463_FBgn0029133_+	REG	0.09	0.12	0.32	0.36	3.24	0.235	0.011129	0.22	0.23	0.33	0.36	1.53	0.12	0.016922	49.3	3.24	1.53	0.235	X_13212393_13212463_FBgn0029133_+	TCGGTAAGT	TAAAAGTCCGCCGATTTCAGACG	11.78	2.97	70
2L_2137927_2137983_FBgn0031390_-	tho2	0.21	0.26	0.46	0.39	1.81	0.19	0.047616	0.2	0.23	0.48	0.41	2.07	0.23	0.026332	36.84	2.07	1.81	0.23	2L_2137927_2137983_FBgn0031390_-	AAGGTGAGA	CAAAAGCCAACGATTTACAGGAC	8.68	0.5	56
2L_2245495_2245544_FBgn0262106_+	CR42859	0	0	0.2	0.24	NA	0.22	0.008163	0.01	0.01	0.22	0.26	24	0.23	0.007477	42	24	24	0.23	2L_2245495_2245544_FBgn0262106_+	AAGGTGAGC	ATCTTGATGAAACGTTTTAGTTA	9.6	1.62	49
3L_13024881_13024937_FBgn0266709_-	Zmynd10	0.02	0	0.22	0.25	23.5	0.225	0.006359	0.03	0	0.22	0.27	16.33	0.23	0.015691	40.35	23.5	16.33	0.23	3L_13024881_13024937_FBgn0266709_-	CCGGTGGGT	TATAATATTTTTTCTTTCAGTGA	7.85	9.53	56
3L_20234869_20234928_FBgn0036958_-	CG17233	0	0	0.25	0.21	NA	0.23	0.007477	0.1	0.08	0.25	0.25	2.78	0.16	0.003884	45	2.78	2.78	0.23	3L_20234869_20234928_FBgn0036958_-	AAGGTGGGT	CACACTTTCTTGGATTTCAGTAC	8.23	6.58	59
3L_21566268_21566325_FBgn0037101_+	CG7634	0.01	0.01	0.19	0.24	21.5	0.205	0.014548	0.02	0.02	0.24	0.26	12.5	0.23	0.001885	37.93	21.5	12.5	0.23	3L_21566268_21566325_FBgn0037101_+	GAAGTGGGT	GTTATAGGCCGTCTTACTAGGAA	2.85	3.13	57
3L_3905540_3905601_FBgn0041147_+	ida	0.09	0.08	0.27	0.21	2.82	0.155	0.036412	0.07	0.04	0.29	0.28	5.18	0.23	0.004693	33.87	5.18	2.82	0.23	3L_3905540_3905601_FBgn0041147_+	ATTGTAGGT	ACATTTATCAATTTTTAAAGAAC	3.34	4.44	61
3L_5796062_5796129_FBgn0035638_-	Tektin-C	0.04	0.03	0.25	0.28	7.57	0.23	0.004693	0.03	0.03	0.2	0.26	7.67	0.2	0.021768	52.94	7.67	7.57	0.23	3L_5796062_5796129_FBgn0035638_-	GGAGTGAGT	GGTGACCCTATTCTATGCAGGGA	6.05	5.13	67
3R_21878078_21878232_FBgn0083984_-	CG34148	0.4	0.43	0.55	0.58	1.36	0.15	0.019419	0.05	0.08	0.3	0.29	4.54	0.23	0.004693	40	4.54	1.36	0.23	3R_21878078_21878232_FBgn0083984_-	TGGGTAAGT	TATCCTTAAATTCTACACAGGCT	10.24	6.81	154
3R_21878078_21878245_FBgn0083984_-	CG34148	0.42	0.44	0.58	0.65	1.43	0.185	0.036602	0.05	0.08	0.3	0.29	4.54	0.23	0.004693	39.29	4.54	1.43	0.23	3R_21878078_21878245_FBgn0083984_-	AAGGTGATT	TATCCTTAAATTCTACACAGGCT	5.88	6.81	167
3R_22373014_22373065_FBgn0038952_+	CG7069	0.01	0	0.2	0.21	41	0.2	0.001248	0.02	0.01	0.24	0.25	16.33	0.23	0.000944	44.23	41	16.33	0.23	3R_22373014_22373065_FBgn0038952_+	AAGGTAGGA	CGCTTATGAATTCTTTCCAGAAA	9.45	7.29	51
3R_24130069_24130121_FBgn0039153_-	GatB	0	0	0.25	0.21	NA	0.23	0.007477	0.04	0	0.19	0.17	9	0.16	0.018977	28.3	9	9	0.23	3R_24130069_24130121_FBgn0039153_-	AAGGTAATT	TCCAACGCTCTGAATTTCAGGAA	8.83	8.11	52
4_369745_369809_FBgn0039904_+	Hcf	0.01	0.01	0.22	0.26	24	0.23	0.007477	0.01	0	0.19	0.25	44	0.215	0.01943	23.08	44	24	0.23	4_369745_369809_FBgn0039904_+	ATGGTTTGT	TATGTTATATATTCATATAGTGG	4.88	4.04	64
X_3172988_3173044_FBgn0028746_-	CG18508	0.01	0	0.21	0.26	47	0.23	0.012065	0.02	0.02	0.18	0.21	9.75	0.175	0.007267	36.84	47	9.75	0.23	X_3172988_3173044_FBgn0028746_-	TAGGTACGT	ATAACTAACCATTTTTAAAGCCC	8.17	3.44	56
2L_12912889_12912944_FBgn0040508_+	ACXC	0.04	0.05	0.28	0.25	5.89	0.22	0.005126	0.04	0.05	0.3	0.24	6	0.225	0.017786	32.14	6	5.89	0.225	2L_12912889_12912944_FBgn0040508_+	CAGGTGATA	CTAAATAAACTATTATGCAGCAC	4.58	1.54	55
2L_13369324_13369385_FBgn0051855_+	CG31855	0.11	0.13	0.37	0.32	2.88	0.225	0.014021	0.12	0.17	0.31	0.31	2.14	0.165	0.022195	38.71	2.88	2.14	0.225	2L_13369324_13369385_FBgn0051855_+	GAGGTGTGT	ACACTTTTCGTACTCTGCAGCAA	6.14	8.52	61
2L_19515108_19515167_FBgn0032797_-	Hasp	0	0	0.18	0.27	NA	0.225	0.03775	0	0	0.13	0.18	NA	0.155	0.025042	46.67	0	0	0.225	2L_19515108_19515167_FBgn0032797_-	AACGTGAGT	TAGCTATTTGATGATTCCAGCTC	9.54	2.4	59
2L_9893070_9893127_FBgn0032154_-	mtDNA-helicase	0	0	0.17	0.18	NA	0.175	0.000815	0	0	0.25	0.2	NA	0.225	0.012122	32.76	0	0	0.225	2L_9893070_9893127_FBgn0032154_-	CGGGTGAGA	TATATTCAATTTTCCTTTAGGAG	7.62	8.9	57
2R_1367714_1367771_FBgn0262123_+	l(2)41Ab	0.77	0.75	0.98	0.99	1.3	0.225	0.00246	0.77	0.79	0.92	0.96	1.21	0.16	0.018977	34.48	1.3	1.21	0.225	2R_1367714_1367771_FBgn0262123_+	CAGGTCTGC	AATAGAAAATGAAATTGCAGAAA	5.61	0.07	57
2R_16272642_16272704_FBgn0053017_+	CG33017	0	0	0.21	0.24	NA	0.225	0.004415	0.01	0	0.17	0.23	40	0.195	0.023473	34.92	40	40	0.225	2R_16272642_16272704_FBgn0053017_+	GAGGTGAGT	TATCTTCTATTTTTACACAGGAG	10.03	8.58	62
2R_16359903_16359970_FBgn0034121_+	CG6262	0.01	0	0.24	0.22	46	0.225	0.00246	0.02	0.02	0.24	0.19	10.75	0.195	0.016042	47.06	46	10.75	0.225	2R_16359903_16359970_FBgn0034121_+	CAGGTGAGT	TTATATTCCGCCTGAGATAGAGG	10.67	-2.16	67
2R_5604651_5604709_FBgn0039969_-	Fis1	0.07	0.04	0.27	0.29	5.09	0.225	0.006359	0.07	0.04	0.26	0.28	4.91	0.215	0.006958	20.34	5.09	4.91	0.225	2R_5604651_5604709_FBgn0039969_-	GAAGTAAAA	ATATTTTGCATTTGCTCCAGAGA	0.12	6.39	58
3L_21635562_21635617_FBgn0037110_+	ORMDL	0.09	0.03	0.31	0.26	4.75	0.225	0.028827	0.07	0.03	0.29	0.22	5.1	0.205	0.03656	55.36	5.1	4.75	0.225	3L_21635562_21635617_FBgn0037110_+	GCAGTGAGT	ATCCTAATCCCTCTTGCCAGGCC	7.39	6.83	55
3R_11972029_11972083_FBgn0037970_+	GC2	0.01	0.01	0.2	0.24	22	0.21	0.008949	0.01	0.01	0.22	0.25	23.5	0.225	0.004415	41.82	23.5	22	0.225	3R_11972029_11972083_FBgn0037970_+	CATGTGAGT	TTATTATCCGCCTAATGGAGAAC	7.83	-6.62	54
3R_14742592_14788056_FBgn0263929_+	jvl	0	0	0.12	0.11	NA	0.115	0.001885	0.01	0.04	0.28	0.22	10	0.225	0.021508	39.14	10	10	0.225	3R_14742592_14788056_FBgn0263929_+	AAGGTGAGT	TTCCAATTGTCATCTTACAGAAT	10.47	8.28	45464
3R_19156547_19156658_FBgn0038683_-	CG11779	0.05	0.04	0.24	0.3	6	0.225	0.017786	0.01	0.01	0.08	0.09	8.5	0.075	0.004415	46.43	8.5	6	0.225	3R_19156547_19156658_FBgn0038683_-	ATGGTAGGT	ATGATTTTTTCTCCTTGCAGTAC	8.6	9.61	111
3R_23189130_23190839_FBgn0262975_-	cnc	0.04	0.08	0.33	0.24	4.75	0.225	0.044713	0	0	0.09	0.09	NA	0.09	0	40.53	4.75	4.75	0.225	3R_23189130_23190839_FBgn0262975_-	CAGGTGAGA	CCTATTATTTTTCATTGCAGGCT	9.22	8.63	1709
3R_27122941_27122998_FBgn0039491_-	CG6059	0	0	0.2	0.23	NA	0.215	0.004832	0	0	0.21	0.24	NA	0.225	0.004415	36.21	0	0	0.225	3R_27122941_27122998_FBgn0039491_-	AGGGTGAGC	TTCGAGGTGGATTTCTACAGAGA	7.75	0.46	57
3R_28694925_28694983_FBgn0039594_+	CG9990	0	0	0.09	0.11	NA	0.1	0.009852	0.09	0	0.25	0.29	6	0.225	0.044713	35.59	6	6	0.225	3R_28694925_28694983_FBgn0039594_+	GAGGTGAGT	TAAAAAATCTTATCCCCCAGATA	10.03	8.6	58
3R_29942982_29943041_FBgn0039727_+	Vps13B	0.01	0	0.24	0.22	46	0.225	0.00246	0.02	0.01	0.24	0.23	15.67	0.22	0.001031	25	46	15.67	0.225	3R_29942982_29943041_FBgn0039727_+	TCGGTAGGG	TAATTAATTATTATTTTAAGATC	6.76	4.59	59
X_11904977_11905034_FBgn0030354_-	Upf1	0.03	0.06	0.26	0.28	6	0.225	0.006359	0.04	0.08	0.27	0.3	4.75	0.225	0.012122	50	6	4.75	0.225	X_11904977_11905034_FBgn0030354_-	TAGGTGAGC	CAATGCACATTGCTAACTAGATC	7.96	2.84	57
X_1455950_1456022_FBgn0027795_-	CG14785	0.01	0.01	0.25	0.22	23.5	0.225	0.004415	0.02	0.01	0.23	0.23	15.33	0.215	0.00054	45.21	23.5	15.33	0.225	X_1455950_1456022_FBgn0027795_-	GAGGTGAGA	CAAACGATAACCATCGGCAGATA	7.66	0.75	72
X_19618188_19618249_FBgn0027358_-	Tim9b	0.06	0.03	0.24	0.3	6	0.225	0.021508	0.08	0.06	0.19	0.25	3.14	0.15	0.041685	50	6	3.14	0.225	X_19618188_19618249_FBgn0027358_-	GAGGTATGT	AATGCCGCTTCACACGACAGGAC	9.81	5.11	61
X_19618188_19618249_FBgn0031041_-	CG12788	0.06	0.03	0.24	0.3	6	0.225	0.021508	0.08	0.06	0.19	0.25	3.14	0.15	0.041685	50	6	3.14	0.225	X_19618188_19618249_FBgn0031041_-	GAGGTATGT	AATGCCGCTTCACACGACAGGAC	9.81	5.11	61
2L_15879293_15879350_FBgn0028935_-	CG7653	0.01	0	0.22	0.22	44	0.215	0.00054	0.01	0	0.21	0.24	45	0.22	0.005126	36.21	45	44	0.22	2L_15879293_15879350_FBgn0028935_-	CAAGTGAGT	CCGCATCTATATATTTCTAGCCG	9.1	4.96	57
2L_19792452_19792509_FBgn0032822_+	CG10466	0.01	0	0.21	0.19	40	0.195	0.003271	0.04	0.02	0.28	0.22	8.33	0.22	0.020042	34.48	40	8.33	0.22	2L_19792452_19792509_FBgn0032822_+	AAGGTAATG	CATTGTTTAAACTTGTCCAGGGC	8.99	5.84	57
2L_2245495_2245550_FBgn0262106_+	CR42859	0	0	0.2	0.24	NA	0.22	0.008163	0.88	0.89	0.97	0.98	1.1	0.09	0.006116	41.07	1.1	1.1	0.22	2L_2245495_2245550_FBgn0262106_+	AAGGTGAGC	ATGAAACGTTTTAGTTACAGGAT	9.6	1.51	55
2R_10940652_10940709_FBgn0033574_-	Spn47C	0.01	0.01	0.24	0.22	23	0.22	0.00206	0.01	0.01	0.21	0.19	20	0.19	0.002759	31.03	23	20	0.22	2R_10940652_10940709_FBgn0033574_-	AAGGTAGGT	ACATTCTATGTTTATTTAAGATG	10.29	6.37	57
2R_15688714_15688764_FBgn0266708_-	Cep89	0.03	0	0.18	0.25	14.33	0.2	0.034391	0.02	0	0.2	0.26	23	0.22	0.020042	45.1	23	14.33	0.22	2R_15688714_15688764_FBgn0266708_-	CTGGTAAGC	AAATAACCATCCTGAAACAGTTG	8.69	2.35	50
2R_22127205_22127305_FBgn0034697_-	GM130	0.06	0.06	0.2	0.22	3.5	0.15	0.004415	0.06	0.05	0.29	0.26	5	0.22	0.005126	44.55	5	3.5	0.22	2R_22127205_22127305_FBgn0034697_-	AAGGTGCGA	ACACGCTTCTGTGGACACAGCTG	7.16	4.15	100
3L_17761142_17761201_FBgn0052181_+	CG32181	0.01	0	0.22	0.22	44	0.215	0.00054	0.01	0	0.23	0.22	45	0.22	0.001031	13.33	45	44	0.22	3L_17761142_17761201_FBgn0052181_+	AGTGTATGT	TTTTGTATACTTTCAAAAAGGCG	4.8	4.25	59
3L_2390186_2390268_FBgn0052298_-	CG32298	0.12	0.13	0.34	0.35	2.76	0.22	0.001031	0.45	0.45	0.5	0.52	1.13	0.06	0.026671	36.14	2.76	1.13	0.22	3L_2390186_2390268_FBgn0052298_-	CAGGTAAGC	GAAAATTAAACCTTTCCAAGATG	9.88	1	82
3L_2390186_2390268_FBgn0052299_-	CG32299	0.12	0.13	0.34	0.35	2.76	0.22	0.001031	0.45	0.45	0.5	0.52	1.13	0.06	0.026671	36.14	2.76	1.13	0.22	3L_2390186_2390268_FBgn0052299_-	CAGGTAAGC	GAAAATTAAACCTTTCCAAGATG	9.88	1	82
3R_11432941_11432994_FBgn0037900_+	CG5276	0	0	0.22	0.22	NA	0.22	0	0.01	0	0.2	0.2	40	0.195	0.000657	38.89	40	40	0.22	3R_11432941_11432994_FBgn0037900_+	GAAGTGAGT	CATCGATCTATCTTTGAAAGATA	7.97	4.1	53
3R_11972029_11972099_FBgn0037970_+	GC2	0.01	0.01	0.2	0.24	22	0.21	0.008949	0.18	0.18	0.39	0.41	2.22	0.22	0.00206	40.85	22	2.22	0.22	3R_11972029_11972099_FBgn0037970_+	CATGTGAGT	GGAGAACTCTATTGCCTTAGCGC	7.83	0.6	70
3R_14097911_14097984_FBgn0038200_-	CG9920	0	0	0.2	0.24	NA	0.22	0.008163	0.01	0.01	0.21	0.25	23	0.22	0.008163	28.38	23	23	0.22	3R_14097911_14097984_FBgn0038200_-	AAGGTAACA	ATTTTTTCTGCTTCCTTAAGAAA	8.92	5.23	73
3R_15792902_15792956_FBgn0038363_+	Acyp2	0.11	0.1	0.28	0.37	3.1	0.22	0.039841	0.09	0.1	0.27	0.34	3.21	0.21	0.027194	34.55	3.21	3.1	0.22	3R_15792902_15792956_FBgn0038363_+	AAGGTATGC	CAGCGTATTAAATTTTGCAGGTG	9.55	5.78	54
3R_8008662_8008775_FBgn0040524_-	CG11052	0.16	0.12	0.39	0.33	2.57	0.22	0.025824	0.12	0.09	0.3	0.25	2.62	0.17	0.028175	36.84	2.62	2.57	0.22	3R_8008662_8008775_FBgn0040524_-	ATGGTAAGA	ATCCAATTACCATGTTTTAGTAC	9.48	3.02	113
3R_9332626_9332682_FBgn0037679_-	Aduk	0.03	0.02	0.23	0.24	9.4	0.21	0.001132	0.03	0.02	0.24	0.25	9.8	0.22	0.001031	24.56	9.8	9.4	0.22	3R_9332626_9332682_FBgn0037679_-	CAGGTTAGC	AATAAGAAACAATATTTAAGCTG	4.9	-1.98	56
X_19614144_19614212_FBgn0031038_+	Tyler	0.03	0.03	0.23	0.26	8.17	0.215	0.004832	0.06	0.05	0.26	0.29	5	0.22	0.005126	52.17	8.17	5	0.22	X_19614144_19614212_FBgn0031038_+	TTAGTATGT	TGATAGGTTTACCATTGCAGTGA	2.85	3.81	68
X_19614144_19614212_FBgn0031039_+	Shawn	0.03	0.03	0.23	0.26	8.17	0.215	0.004832	0.06	0.05	0.26	0.29	5	0.22	0.005126	52.17	8.17	5	0.22	X_19614144_19614212_FBgn0031039_+	TTAGTATGT	TGATAGGTTTACCATTGCAGTGA	2.85	3.81	68
X_622359_622433_FBgn0016038_+	Vsp37A	0.04	0.05	0.19	0.24	4.78	0.17	0.02176	0.06	0.07	0.25	0.32	4.38	0.22	0.024867	48	4.78	4.38	0.22	X_622359_622433_FBgn0016038_+	AGGGTGAGT	GCATTCCATTTCCCCTGAAGGAG	9.25	5.46	74
X_6384279_6384337_FBgn0053664_+	CG33664	0	0	0.21	0.23	NA	0.22	0.00206	0	0.03	0.2	0.22	14	0.195	0.008439	35.59	14	14	0.22	X_6384279_6384337_FBgn0053664_+	TTGGTACGT	TAAGCTCATACCGTTGACAGACT	8.11	2.15	58
2L_10401595_10401661_FBgn0051716_+	Cnot4	0.04	0.03	0.21	0.29	7.14	0.215	0.033403	0.04	0.04	0.24	0.26	6.25	0.21	0.00226	38.81	7.14	6.25	0.215	2L_10401595_10401661_FBgn0051716_+	ATGGTGGGA	TATTTACGTTGTTATCCTAGGAC	2.88	6.68	66
2L_18838793_18838882_FBgn0032717_-	CG10600	0.01	0.01	0.21	0.24	22.5	0.215	0.004832	0.87	0.87	0.95	0.94	1.09	0.075	0.004415	48.89	22.5	1.09	0.215	2L_18838793_18838882_FBgn0032717_-	CAGGTAAAG	GCCAACGCCGCCCACAGAAGAGC	9.65	-5.12	89
2L_2665199_2665255_FBgn0031444_+	CG9879	0.01	0.01	0.25	0.2	22.5	0.215	0.013253	0.01	0.01	0.22	0.19	20.5	0.195	0.005865	36.84	22.5	20.5	0.215	2L_2665199_2665255_FBgn0031444_+	GGAGTAGGT	TGTTATTGTGCCACTTACAGAAA	3.34	8.1	56
2L_306390_317742_FBgn0004611_+	Plc21C	0	0	0.18	0.25	NA	0.215	0.025492	0	0	0.07	0.08	NA	0.075	0.004415	42.9	0	0	0.215	2L_306390_317742_FBgn0004611_+	CAGGTAATC	CAATTTTTTTGTGCTTGCAGAAA	6.99	8.62	11352
2L_3363196_3363306_FBgn0085423_-	CG34394	0	0	0.2	0.23	NA	0.215	0.004832	0	0	0.18	0.23	NA	0.205	0.014548	45.05	0	0	0.215	2L_3363196_3363306_FBgn0085423_-	CAGGTGAGT	ATTCTAATTCCGTTTCATAGAAC	10.67	6.52	110
2R_17494183_17494234_FBgn0050103_+	CG30103	0.03	0.07	0.23	0.3	5.3	0.215	0.033403	0.04	0.08	0.22	0.29	4.25	0.195	0.040177	34.62	5.3	4.25	0.215	2R_17494183_17494234_FBgn0050103_+	ATGGTACTG	TTGCAATGATCCCTTTGCAGGCC	4.16	8.04	51
2R_24906443_24906498_FBgn0085434_+	NaCP60E	0	0	0.25	0.18	NA	0.215	0.025492	0	0	0.2	0.15	NA	0.175	0.019804	41.07	0	0	0.215	2R_24906443_24906498_FBgn0085434_+	AAAGTGAGT	ATTTTTTCTTGCCCTCAAAGGTC	8.4	9.22	55
2R_9582074_9582128_FBgn0033427_-	Smyd4-1	0.06	0.04	0.25	0.22	4.7	0.185	0.009363	0.02	0.02	0.26	0.21	11.75	0.215	0.013253	38.18	11.75	4.7	0.215	2R_9582074_9582128_FBgn0033427_-	ATGGTAGGC	ATAAACCTCTACTTAAACAGGAG	7.42	5.58	54
3L_12134660_12134724_FBgn0036254_-	CG5645	0.01	0	0.22	0.22	44	0.215	0.00054	0.01	0.02	0.2	0.19	13	0.18	0.00154	35.38	44	13	0.215	3L_12134660_12134724_FBgn0036254_-	AGGGTGAGT	AAAACTTGACTCTCATGCAGTTC	9.25	3.79	64
3L_22855739_22855791_FBgn0052459_-	CG32459	0.04	0.04	0.25	0.26	6.38	0.215	0.00054	0.05	0.05	0.26	0.26	5.2	0.21	0	54.72	6.38	5.2	0.215	3L_22855739_22855791_FBgn0052459_-	GAGGTTAGT	ACAAAAGTCTGACCCCGCAGAAG	7.15	4.39	52
3R_20043878_20043933_FBgn0064119_+	CG33934	0.01	0	0.18	0.25	43	0.21	0.027194	0.01	0	0.19	0.25	44	0.215	0.01943	25	44	43	0.215	3R_20043878_20043933_FBgn0064119_+	AGAGTAAGA	TCAATTTTAATCATGTGCAGACC	5.73	6.71	55
3R_20043878_20043933_FBgn0260466_+	Indy-2	0.01	0	0.18	0.25	43	0.21	0.027194	0.01	0	0.19	0.25	44	0.215	0.01943	25	44	43	0.215	3R_20043878_20043933_FBgn0260466_+	AGAGTAAGA	TCAATTTTAATCATGTGCAGACC	5.73	6.71	55
3R_21885140_21885197_FBgn0038915_-	CG17819	0.01	0.01	0.21	0.24	22.5	0.215	0.004832	0.01	0.02	0.22	0.24	15.33	0.215	0.002693	39.66	22.5	15.33	0.215	3R_21885140_21885197_FBgn0038915_-	TTGGTGAGA	CTACAATCCCTGAACCGTAGATT	6.29	4.05	57
3R_25074286_25074358_FBgn0039273_-	shams	0	0	0.16	0.18	NA	0.17	0.003442	0	0	0.24	0.19	NA	0.215	0.013253	28.77	0	0	0.215	3R_25074286_25074358_FBgn0039273_-	ATGGTAAAT	CTATTTTGGCACCATTTTAGCAA	6.41	4.86	72
3R_30039886_30039938_FBgn0003511_+	Sry-beta	0.01	0.03	0.19	0.28	11.75	0.215	0.043026	0	0.03	0.14	0.2	11.33	0.155	0.043774	50.94	11.75	11.33	0.215	3R_30039886_30039938_FBgn0003511_+	AAGGTAACG	GATAGCCGACTTTTTCACAGGCT	10.19	4.46	52
3R_6641843_6641906_FBgn0051286_+	CG31286	0.01	0	0.21	0.22	43	0.21	0.001132	0	0	0.22	0.21	NA	0.215	0.00054	35.94	43	43	0.215	3R_6641843_6641906_FBgn0051286_+	AAAGTAAGT	AATTGATCCCCGTTCCTTAGTGC	9.72	4.64	63
3R_7094402_7094470_FBgn0040670_+	e(y)2b	0.02	0.01	0.24	0.22	15.33	0.215	0.002693	0.01	0.01	0.22	0.21	21.5	0.205	0.000594	31.88	21.5	15.33	0.215	3R_7094402_7094470_FBgn0040670_+	CAAGTAGGT	ATCAATTGAAATCTTAACAGGCT	7.33	4.94	68
X_15774103_15774171_FBgn0263747_+	CG43672	0	0	0.22	0.21	NA	0.215	0.00054	0	0	0.22	0.16	NA	0.19	0.024036	40.58	0	0	0.215	X_15774103_15774171_FBgn0263747_+	AAGGTATGT	GTCCGGTTCGGCATTTTCAGATC	9.79	7.04	68
X_19653263_19653321_FBgn0031052_+	CG14215	0.01	0.01	0.17	0.24	20.5	0.195	0.030738	0.02	0.02	0.21	0.26	11.75	0.215	0.013253	47.46	20.5	11.75	0.215	X_19653263_19653321_FBgn0031052_+	ACGGTGAGT	AACCTTCAATTTACCAACAGTGG	11.45	6.15	58
X_20486273_20486349_FBgn0040649_+	CG15461	0.01	0.01	0.21	0.24	22.5	0.215	0.004832	0.01	0.02	0.21	0.22	14.33	0.2	0.001248	49.35	22.5	14.33	0.215	X_20486273_20486349_FBgn0040649_+	CAGGTAAGC	AATTCACAATTCATGGACAGTTT	9.88	2.79	76
2L_14871767_14871819_FBgn0032553_-	CG4480	0.01	0.01	0.2	0.21	20.5	0.195	0.000657	0.01	0.01	0.21	0.23	22	0.21	0.00226	28.3	22	20.5	0.21	2L_14871767_14871819_FBgn0032553_-	CAAGTTGGT	CTGAAAAATTGTACTTGTAGTGG	2.11	2.73	52
2L_2224686_2224743_FBgn0031401_+	papi	0	0	0.2	0.21	NA	0.205	0.000594	0	0.01	0.22	0.21	43	0.21	0.001132	32.76	43	43	0.21	2L_2224686_2224743_FBgn0031401_+	AGGGTATGA	TAAACACCGAACATTTGTAGTGG	6.84	-0.13	57
2L_7232646_7232704_FBgn0264344_-	CG43800	0.01	0	0.25	0.18	43	0.21	0.027194	0.01	0	0.24	0.18	42	0.205	0.02131	35.59	43	42	0.21	2L_7232646_7232704_FBgn0264344_-	TTGGTACGT	TAAGCTCATATAATTGCCAGACA	8.11	0.72	58
2L_8216344_8216402_FBgn0032003_+	CG8349	0.06	0.06	0.28	0.26	4.5	0.21	0.00226	0.07	0.08	0.27	0.25	3.47	0.185	0.003632	44.07	4.5	3.47	0.21	2L_8216344_8216402_FBgn0032003_+	TTGGTAAGG	AATCAAACCGTAATCTCCAGGTG	8.92	5.36	58
2R_14090793_14090855_FBgn0259183_+	CG42287	0	0.01	0.23	0.18	41	0.2	0.015864	0.01	0.02	0.25	0.2	15	0.21	0.014421	38.1	41	15	0.21	2R_14090793_14090855_FBgn0259183_+	TAGGTGGGT	TTGATTTTCATACCCCCTAGTTG	5.56	7.39	62
2R_18823174_18823236_FBgn0034396_-	CG15097	0	0	0.14	0.16	NA	0.15	0.004415	0	0	0.21	0.21	NA	0.21	0	33.33	0	0	0.21	2R_18823174_18823236_FBgn0034396_-	AAGGTAAGG	ATAATTCGGTTCTTTTCCAGATC	10.51	9.06	62
2R_20343998_20344055_FBgn0034506_+	CG13870	0.02	0.03	0.21	0.26	9.4	0.21	0.014421	0.01	0.02	0.16	0.22	12.67	0.175	0.028901	29.31	12.67	9.4	0.21	2R_20343998_20344055_FBgn0034506_+	CCCGTAAGA	TTAATAAACCTTCTATTCAGGCA	5.66	6.23	57
2R_8127010_8127064_FBgn0033265_-	coil	0.01	0.03	0.25	0.21	11.5	0.21	0.011149	0.01	0.02	0.22	0.17	13	0.18	0.019478	27.27	13	11.5	0.21	2R_8127010_8127064_FBgn0033265_-	TTGGCAAGA	AATAAATTGCATTCAAACAGAAG	1.09	4.04	54
3L_15301838_15301888_FBgn0036492_-	Best3	0.08	0.06	0.28	0.25	3.79	0.195	0.008439	0.05	0.01	0.25	0.23	8	0.21	0.011149	29.41	8	3.79	0.21	3L_15301838_15301888_FBgn0036492_-	CAGGTTAGT	TTACGATAGATTATTCTCAGGTC	8.02	1.46	50
3L_16783246_16783307_FBgn0036662_+	CG9706	0.01	0.01	0.21	0.23	22	0.21	0.00226	0.03	0.02	0.2	0.23	8.6	0.19	0.006854	41.94	22	8.6	0.21	3L_16783246_16783307_FBgn0036662_+	CAGGTGAGC	ACCTATCGCTATTTGATCAGCAT	9.6	3.33	61
3L_7895389_7895445_FBgn0035823_+	eIF4E5	0.05	0.05	0.25	0.27	5.2	0.21	0.00226	0.04	0.04	0.23	0.24	5.87	0.195	0.000657	35.09	5.87	5.2	0.21	3L_7895389_7895445_FBgn0035823_+	AAAGTACGA	TAAATCCTCTACTCCCAAAGACC	4.65	3.13	56
3R_12049073_12049131_FBgn0037987_-	CG14739	0.01	0.01	0.22	0.22	22	0.21	0	0.04	0.04	0.21	0.23	5.5	0.18	0.003072	33.9	22	5.5	0.21	3R_12049073_12049131_FBgn0037987_-	TATGTAAGC	TTAACTAACCTATCCACCAGCTG	4.2	4.87	58
3R_16468676_16468832_FBgn0250754_-	CG42232	0.03	0.05	0.14	0.14	3.5	0.1	0.009852	0.06	0.05	0.29	0.24	4.82	0.21	0.014421	43.95	4.82	3.5	0.21	3R_16468676_16468832_FBgn0250754_-	CAAGTAAGT	CTCTGCTTATACCTTTTCAGTTT	10.08	9.06	156
3R_18253793_18253852_FBgn0263738_-	Ada2a	0.07	0.09	0.25	0.33	3.63	0.21	0.036454	0.09	0.09	0.2	0.23	2.39	0.125	0.014096	38.33	3.63	2.39	0.21	3R_18253793_18253852_FBgn0263738_-	GAGGTGGGA	TAATTTTTCTTTGATCCCAGATC	4.3	7.15	59
3R_19327379_19327482_FBgn0265064_-	CR44175	0.02	0.01	0.13	0.19	10.67	0.145	0.04129	0.21	0.24	0.41	0.46	1.93	0.21	0.018734	19.23	10.67	1.93	0.21	3R_19327379_19327482_FBgn0265064_-	AATGCAAGT	TTTATCGTTTATTTCAATAGAGA	0.87	6.83	103
3R_4440324_4440392_FBgn0037252_+	CG14650	0.03	0	0.2	0.25	15	0.21	0.018734	0.02	0	0.2	0.24	22	0.21	0.011149	34.78	22	15	0.21	3R_4440324_4440392_FBgn0037252_+	GATGTAAGG	TGTTTTTGTTTTCGCAATAGGGT	6.35	9.02	68
3R_5649238_5649329_FBgn0262125_+	Sec23	0.32	0.4	0.57	0.57	1.58	0.21	0.034419	0.42	0.41	0.6	0.55	1.39	0.16	0.024463	55.43	1.58	1.39	0.21	3R_5649238_5649329_FBgn0262125_+	CGCGTGAGT	CCGATTTTTCCAATTGGCAGAGG	8.4	3.87	91
3R_5649238_5649358_FBgn0262125_+	Sec23	0.32	0.4	0.57	0.57	1.58	0.21	0.034419	0.48	0.48	0.63	0.59	1.27	0.13	0.02286	51.24	1.58	1.27	0.21	3R_5649238_5649358_FBgn0262125_+	CGCGTGAGT	AGAGGTTTTTCCGATTTAAGTAT	8.4	2.16	120
3R_9510017_9510162_FBgn0267790_-	rump	0.01	0.01	0.18	0.22	20	0.19	0.0109	0.04	0.02	0.22	0.26	8	0.21	0.011149	47.26	20	8	0.21	3R_9510017_9510162_FBgn0267790_-	AAGGTAAGC	GCATTGCGAATCCCTTGCAGACA	10.22	6.27	145
2L_7806923_7806989_FBgn0031952_-	cdc14	0	0	0.19	0.22	NA	0.205	0.005311	0.01	0	0.17	0.2	37	0.18	0.007628	38.81	37	37	0.205	2L_7806923_7806989_FBgn0031952_-	AAGGTGAGA	TAATTCTATACTGTTTGCAGACC	8.68	5.88	66
2R_6669225_6669329_FBgn0033086_+	CG9410	1.35	1.34	1.51	1.59	1.15	0.205	0.03656	0.64	0.67	0.81	0.82	1.24	0.16	0.009625	45.71	1.24	1.15	0.205	2R_6669225_6669329_FBgn0033086_+	AAGGTCAGC	TTGCTCTTATCCTGTTGCAGTGG	7.09	8.25	104
3L_13247938_13247991_FBgn0052119_-	CG32119	0.1	0.08	0.31	0.28	3.28	0.205	0.007645	0.03	0.02	0.21	0.19	8	0.175	0.004057	33.33	8	3.28	0.205	3L_13247938_13247991_FBgn0052119_-	TAGGTCAGA	TCTACTTTCTGTCACTTTAGGCG	4.42	8.27	53
3L_21822320_21822395_FBgn0022936_+	CycH	0.04	0.05	0.21	0.22	4.78	0.17	0.001726	0.02	0.05	0.26	0.22	6.86	0.205	0.014548	40.79	6.86	4.78	0.205	3L_21822320_21822395_FBgn0022936_+	TCTGTAGGA	AAATGTATAAACCTTTTCAGAGC	-1.79	4.96	75
3L_7696725_7696779_FBgn0261788_-	Ank2	0.02	0	0.17	0.13	15	0.14	0.024574	0.03	0	0.2	0.24	14.67	0.205	0.014548	32.73	15	14.67	0.205	3L_7696725_7696779_FBgn0261788_-	GTGGTAAGT	ATACAACAATTTGAAAATAGATT	10.36	0.42	54
3R_10248970_10250927_FBgn0261928_+	CG42795	0.02	0.01	0.25	0.19	14.67	0.205	0.02131	0.04	0.01	0.22	0.19	8.2	0.18	0.013606	43.36	14.67	8.2	0.205	3R_10248970_10250927_FBgn0261928_+	AGGGTAAGA	TAATTAAATACCAATTGCAGTTG	9.21	3.27	1957
3R_11217566_11217623_FBgn0037876_+	CG4820	0.03	0.04	0.21	0.27	6.86	0.205	0.02131	0.06	0.1	0.22	0.27	3.06	0.165	0.035648	34.48	6.86	3.06	0.205	3R_11217566_11217623_FBgn0037876_+	AAGGTGCGT	TGATTATAATCATTTTACAGGGA	9.49	7.82	57
3R_12219415_12219470_FBgn0037998_-	CG4848	0.02	0.01	0.18	0.26	14.67	0.205	0.03656	0.01	0.02	0.13	0.16	9.67	0.13	0.014473	37.5	14.67	9.67	0.205	3R_12219415_12219470_FBgn0037998_-	CGGGTGAGT	AAACATTCTAAATCTTTAAGGGA	9.89	4.51	55
3R_12422871_12422932_FBgn0038043_+	CG17202	0.01	0.02	0.22	0.22	14.67	0.205	0.000594	0.06	0.05	0.24	0.24	4.36	0.185	0.00073	45.16	14.67	4.36	0.205	3R_12422871_12422932_FBgn0038043_+	AAGGTGAGC	AGTCTCCCGCAATGACACAGCCC	9.6	0.59	61
3R_20047078_20047139_FBgn0064119_+	CG33934	0.01	0.01	0.18	0.25	21.5	0.205	0.027934	0.02	0.02	0.16	0.21	9.25	0.165	0.022195	41.94	21.5	9.25	0.205	3R_20047078_20047139_FBgn0064119_+	TACGTAAGG	GCAGCTGATAAAACCCATAGACG	6.01	0.24	61
3R_20047078_20047139_FBgn0260466_+	Indy-2	0.01	0.01	0.18	0.25	21.5	0.205	0.027934	0.02	0.02	0.16	0.21	9.25	0.165	0.022195	41.94	21.5	9.25	0.205	3R_20047078_20047139_FBgn0260466_+	TACGTAAGG	GCAGCTGATAAAACCCATAGACG	6.01	0.24	61
3R_28921270_28921340_FBgn0265998_+	Doa	0.22	0.19	0.42	0.4	2	0.205	0.007645	0.22	0.21	0.37	0.39	1.77	0.165	0.00456	42.25	2	1.77	0.205	3R_28921270_28921340_FBgn0265998_+	ACGGTAATA	CGAAATCGTTTAACGTGTAGCAA	6.25	1.6	70
3R_7094201_7094262_FBgn0040670_+	e(y)2b	0	0	0.22	0.18	NA	0.2	0.009852	0.01	0	0.22	0.2	42	0.205	0.002961	41.94	42	42	0.205	3R_7094201_7094262_FBgn0040670_+	CGCGTAAGT	CGTTCTCGTTAACTCAACAGCCT	9.93	4.75	61
3R_8652683_8652736_FBgn0000447_-	Dhod	0.02	0.02	0.22	0.23	11.25	0.205	0.000594	0.01	0.01	0.18	0.19	18.5	0.175	0.000815	50	18.5	11.25	0.205	3R_8652683_8652736_FBgn0000447_-	GTTGTGAGT	CAGAATGATTCCGCCCACAGGGT	6.59	6.75	53
X_18075505_18075555_FBgn0013809_+	--	0.01	0	0.22	0.19	41	0.2	0.006192	0.03	0.02	0.25	0.21	9.2	0.205	0.009962	45.1	41	9.2	0.205	X_18075505_18075555_FBgn0013809_+	AAGGTGGGT	TCCATCATACTCCCATATAGGAA	8.23	7.26	50
2L_11519115_11519171_FBgn0032364_+	CG4970	0.01	0	0.18	0.2	38	0.185	0.003632	0.04	0.03	0.22	0.25	6.71	0.2	0.006192	31.58	38	6.71	0.2	2L_11519115_11519171_FBgn0032364_+	AAGGTCGAA	AAAAAAGGGTTTACCCACAGAAA	-1.06	4.34	56
2L_12914114_12914172_FBgn0040508_+	ACXC	0.08	0.09	0.23	0.28	3	0.17	0.02176	0.14	0.11	0.29	0.36	2.6	0.2	0.034391	32.2	3	2.6	0.2	2L_12914114_12914172_FBgn0040508_+	GGGGTACTC	TTGATCGATATCTTTGTCAGGAA	1.67	4.77	58
2L_13776035_13776097_FBgn0028540_-	CG9008	0.01	0	0.17	0.18	35	0.17	0.001726	0.01	0	0.21	0.2	41	0.2	0.001248	44.44	41	35	0.2	2L_13776035_13776097_FBgn0028540_-	TCCGTAAGT	ATTTTTGGCCACCATTTTAGCTC	10.27	5.97	62
2L_16891738_16891792_FBgn0261671_+	tweek	0	0	0.21	0.19	NA	0.2	0.002491	0.05	0	0.19	0.21	8	0.175	0.022865	29.09	8	8	0.2	2L_16891738_16891792_FBgn0261671_+	AAGGTGAGT	ATGACAATCATTTTTCATAGATC	10.47	6.38	54
2L_16900047_16900100_FBgn0051805_-	CG31805	0.01	0.01	0.18	0.21	19.5	0.185	0.00651	0.02	0.02	0.2	0.24	11	0.2	0.009852	38.89	19.5	11	0.2	2L_16900047_16900100_FBgn0051805_-	ACGGTAAGT	CCGGCTGAAACTTTTCAAAGAAA	11.81	1.65	53
2L_16900300_16900353_FBgn0051805_-	CG31805	0.01	0	0.2	0.21	41	0.2	0.001248	0.01	0	0.16	0.18	34	0.165	0.00456	33.33	41	34	0.2	2L_16900300_16900353_FBgn0051805_-	GTGGTAAGT	TTGTGCAATCGGTGCTCTAGGAA	10.36	6.79	53
2L_17511349_17511425_FBgn0013810_+	Dhc36C	0.02	0.02	0.13	0.19	8	0.14	0.04298	0.02	0.02	0.22	0.22	11	0.2	0	50.65	11	8	0.2	2L_17511349_17511425_FBgn0013810_+	CAGGTGGGG	ACTCTTTTAGACTCTTACAGATC	6.92	4.66	76
2L_2080124_2080207_FBgn0031388_+	CG12674	0.04	0.01	0.19	0.26	9	0.2	0.034391	0.02	0.01	0.18	0.23	13.67	0.19	0.017533	36.9	13.67	9	0.2	2L_2080124_2080207_FBgn0031388_+	GCAGTAAGT	AAAACACACACACTTCTCAGCAA	9.07	1.99	83
2L_2816662_2816717_FBgn0031464_-	--	0	0	0.2	0.2	NA	0.2	0	0	0	0.17	0.2	NA	0.185	0.00651	33.93	0	0	0.2	2L_2816662_2816717_FBgn0031464_-	CTGGTATGT	AGAATTATTCTGGCTTTCAGTAC	8.14	4.14	55
2L_4981285_4981383_FBgn0031664_-	CG8892	1.19	1.19	1.4	1.38	1.17	0.2	0.002491	0.81	0.81	0.87	0.89	1.09	0.07	0.019804	43.43	1.17	1.09	0.2	2L_4981285_4981383_FBgn0031664_-	ATTGTAGGT	GCTAACAATTTTTCCCACAGCTG	3.34	7.93	98
2L_5013612_5013674_FBgn0016075_-	vkg	0	0	0.21	0.19	NA	0.2	0.002491	0	0	0.16	0.11	NA	0.135	0.032625	44.44	0	0	0.2	2L_5013612_5013674_FBgn0016075_-	GCGGTAAGT	TGACATGTCTTGTTCCTCAGTTG	11.37	7.86	62
2L_5923480_5923533_FBgn0031751_-	CG9016	0.13	0.13	0.3	0.36	2.54	0.2	0.021768	0.01	0.01	0.18	0.2	19	0.18	0.003072	25.93	19	2.54	0.2	2L_5923480_5923533_FBgn0031751_-	CAGGTGTGC	TTTTAACACTACGATTTCAGTGA	6.46	3.62	53
2L_884653_884721_FBgn0031292_-	CG15824	0.01	0.03	0.2	0.24	11	0.2	0.01227	0.01	0.06	0.21	0.21	6	0.175	0.019804	42.03	11	6	0.2	2L_884653_884721_FBgn0031292_-	CTGGTGAGT	TTAATGGAACTGGTCTGCAGTTC	10.1	2.59	68
2R_10248672_10248720_FBgn0033499_+	CG12914	0.03	0.04	0.23	0.2	6.14	0.18	0.007628	0.02	0.03	0.24	0.21	9	0.2	0.006192	48.98	9	6.14	0.2	2R_10248672_10248720_FBgn0033499_+	TTCGTAAGT	ACTTACCTCCTTTACCACAGACT	9.77	7.45	48
2R_14161092_14161150_FBgn0033900_-	CysRS-m	0	0	0.21	0.19	NA	0.2	0.002491	0	0.01	0.15	0.14	29	0.14	0.002541	37.29	29	29	0.2	2R_14161092_14161150_FBgn0033900_-	CCTGTGAGT	AGCCCAAATGTTTCCCACAGCAA	7.21	5.61	58
2R_23365388_23365446_FBgn0003977_-	vir	0	0	0.17	0.16	NA	0.165	0.000917	0	0	0.22	0.18	NA	0.2	0.009852	30.51	0	0	0.2	2R_23365388_23365446_FBgn0003977_-	GTGGTAAGT	TCACAGACCTTTCATTGCAGTTC	10.36	5.4	58
2R_24066178_24066260_FBgn0034970_-	yki	0.01	0.01	0.19	0.23	21	0.2	0.009852	0.01	0.01	0.16	0.22	19	0.18	0.026671	56.63	21	19	0.2	2R_24066178_24066260_FBgn0034970_-	CAGGTAAGC	TGCCCACTTTACGCTTTCAGATT	9.88	9.63	82
2R_24475545_24475615_FBgn0035009_+	CG16837	0	0.01	0.19	0.22	41	0.2	0.006192	0.01	0.01	0.13	0.16	14.5	0.135	0.012122	50.7	41	14.5	0.2	2R_24475545_24475615_FBgn0035009_+	TATGTAAGT	GCATTTGTCCATCTCCCTAGTCG	6.69	8.15	70
2R_8417538_8417623_FBgn0262988_-	CG43296	0.01	0	0.16	0.23	39	0.19	0.032925	0	0	0.18	0.22	NA	0.2	0.009852	46.51	39	39	0.2	2R_8417538_8417623_FBgn0262988_-	CTGGTAAGC	TCTTTGTTTATATGCACCAGCGA	8.69	3.13	85
3L_20817535_20817596_FBgn0086915_-	Mst77F	0.03	0.03	0.23	0.23	7.67	0.2	0	0.01	0	0.2	0.2	40	0.195	0.000657	41.94	40	7.67	0.2	3L_20817535_20817596_FBgn0086915_-	GCGGTAAGT	ATCGTAATGCACTTCCGCAGGAA	11.37	6.16	61
3L_21446024_21446197_FBgn0086377_+	--	0.13	0.09	0.32	0.3	2.82	0.2	0.01227	0.29	0.28	0.4	0.44	1.47	0.135	0.022534	43.68	2.82	1.47	0.2	3L_21446024_21446197_FBgn0086377_+	AAGGTGTGT	TCGATTGTCTGTCTCTCCAGGAA	6.64	10.03	173
3L_4381127_4381189_FBgn0052240_-	CG32240	0	0	0.18	0.22	NA	0.2	0.009852	0	0	0.17	0.21	NA	0.19	0.0109	19.05	0	0	0.2	3L_4381127_4381189_FBgn0052240_-	GCGGTATAA	TCATTTATACACCATTTAAGACC	2.94	3.61	62
3L_6753238_6753317_FBgn0035714_+	CG8549	0.05	0.05	0.25	0.25	5	0.2	0	0.07	0.05	0.21	0.22	3.58	0.155	0.005163	35	5	3.58	0.2	3L_6753238_6753317_FBgn0035714_+	CAGGTAACA	ACTTTATTGTATATGCTTAGCGA	8.88	4.13	79
3L_8974348_8974656_FBgn0086706_-	pix	0.21	0.23	0.39	0.45	1.91	0.2	0.0241	0.4	0.37	0.49	0.51	1.3	0.115	0.023704	42.07	1.91	1.3	0.2	3L_8974348_8974656_FBgn0086706_-	CAGGTAAAT	CATTTGAAAACTATCAACAGCAT	8.76	2.28	308
3R_25309946_25310006_FBgn0051099_-	CG31099	0.03	0.04	0.23	0.23	6.57	0.195	0.000657	0.01	0	0.2	0.21	41	0.2	0.001248	39.34	41	6.57	0.2	3R_25309946_25310006_FBgn0051099_-	CCTGTAGGT	TACTCATTAACATTTTCCAGGCC	3.22	5.86	60
3R_27700526_27700598_FBgn0045862_+	btz	0.18	0.21	0.4	0.39	2.03	0.2	0.006192	0.1	0.16	0.29	0.29	2.23	0.16	0.033405	50.68	2.23	2.03	0.2	3R_27700526_27700598_FBgn0045862_+	CACGTGAGT	CGTTCTATGTCATTCCGCAGAAG	9.3	9.03	72
3R_27929897_27929980_FBgn0027579_+	mino	0.03	0.02	0.21	0.24	9	0.2	0.006192	0.05	0.05	0.18	0.2	3.8	0.14	0.005063	46.43	9	3.8	0.2	3R_27929897_27929980_FBgn0027579_+	GAGGTACCA	TTCCGATCGTTTCATTGCAGGAG	6.43	7.62	83
3R_5758851_5760160_FBgn0027608_-	CG2082	0.04	0.03	0.19	0.16	5	0.14	0.012516	0.07	0.04	0.26	0.25	4.64	0.2	0.006192	36.26	5	4.64	0.2	3R_5758851_5760160_FBgn0027608_-	ACAGTGAGT	ACCCGTCGCCCACCAACCAGCCA	8.34	2.28	1309
3R_9255599_9255662_FBgn0037667_+	CG16734	0	0	0.18	0.2	NA	0.19	0.002759	0	0	0.19	0.21	NA	0.2	0.002491	35.94	0	0	0.2	3R_9255599_9255662_FBgn0037667_+	GAGGTATAC	TCACTTACTTTATCCCGCAGCTT	6.64	9.57	63
3R_9567557_9567610_FBgn0037712_+	CG16789	0	0	0.18	0.22	NA	0.2	0.009852	0	0	0.11	0.12	NA	0.115	0.001885	22.22	0	0	0.2	3R_9567557_9567610_FBgn0037712_+	TCTGTGAGT	TAATCTTTTTACAACTTCAGGTT	7	7.58	53
3R_9683882_9683949_FBgn0037730_-	CG9444	0	0	0.2	0.17	NA	0.185	0.00651	0	0	0.2	0.2	NA	0.2	0	44.12	0	0	0.2	3R_9683882_9683949_FBgn0037730_-	AAAGTGAGT	TCTCTCCCTATTACATGTAGCCC	8.4	5.77	67
X_15338705_15338836_FBgn0026428_+	HDAC6	0.42	0.44	0.6	0.62	1.42	0.18	0.006116	0.54	0.48	0.68	0.74	1.39	0.2	0.042174	56.06	1.42	1.39	0.2	X_15338705_15338836_FBgn0026428_+	GAGGTACGA	GATCCCCATTCGCGTGTCAGGCC	8.65	6.15	131
2L_20734730_20734928_FBgn0262743_+	Fs(2)Ket	0.05	0.07	0.21	0.21	3.5	0.15	0.004415	0.15	0.16	0.37	0.33	2.26	0.195	0.010993	29.65	3.5	2.26	0.195	2L_20734730_20734928_FBgn0262743_+	GTAGTAAGT	AAAATCGACATTCGTTTCAGCTC	8.01	5.03	198
2L_5040028_5040119_FBgn0260451_+	CG14042	0.05	0.07	0.23	0.28	4.25	0.195	0.018538	0.08	0.07	0.22	0.25	3.13	0.16	0.009625	47.83	4.25	3.13	0.195	2L_5040028_5040119_FBgn0260451_+	CAGGTAGAC	GAGTACGTCCTCGCCCCCAGGTG	6.89	8.9	91
2L_5040028_5040119_FBgn0260470_+	SP555	0.05	0.07	0.23	0.28	4.25	0.195	0.018538	0.08	0.07	0.22	0.25	3.13	0.16	0.009625	47.83	4.25	3.13	0.195	2L_5040028_5040119_FBgn0260470_+	CAGGTAGAC	GAGTACGTCCTCGCCCCCAGGTG	6.89	8.9	91
2R_24502022_24502085_FBgn0017556_-	Prosalpha4T2	0.02	0.01	0.19	0.23	14	0.195	0.010993	0.01	0.01	0.16	0.18	17	0.16	0.003884	46.88	17	14	0.195	2R_24502022_24502085_FBgn0017556_-	GTGGTAAGT	CCTCCAAATACTAACCAAAGATG	10.36	0.04	63
3L_16330145_16330229_FBgn0053061_+	CG33061	0.02	0.03	0.25	0.19	8.8	0.195	0.023473	0.01	0.03	0.08	0.09	4.25	0.065	0.028334	32.94	8.8	4.25	0.195	3L_16330145_16330229_FBgn0053061_+	CTGGTGAGT	TTTATTTTGTTTATATGAAGCTT	10.1	5.19	84
3L_4402157_4402224_FBgn0035539_+	slow	0	0	0.22	0.17	NA	0.195	0.016042	0	0	0.22	0.16	NA	0.19	0.024036	23.53	0	0	0.195	3L_4402157_4402224_FBgn0035539_+	AACGTGAGT	TATCTTCTAATTATTTACAGCTA	9.54	8.14	67
3R_12705282_12705343_FBgn0038080_+	CG12279	0.05	0.05	0.23	0.26	4.9	0.195	0.005865	0.05	0.06	0.23	0.26	4.45	0.19	0.006854	48.39	4.9	4.45	0.195	3R_12705282_12705343_FBgn0038080_+	CACGTGAGA	CGCCTTTTTCTAATTTCCAGTGA	5.23	8.09	61
3R_18748071_18748130_FBgn0260399_+	gwl	0	0.02	0.21	0.2	20.5	0.195	0.003271	0	0.02	0.18	0.21	19.5	0.185	0.009363	31.67	20.5	19.5	0.195	3R_18748071_18748130_FBgn0260399_+	AATGTGGGT	ATCATTCTCCGAATCTTCAGCCC	2.76	4.61	59
3R_20821542_20821600_FBgn0038829_-	CG17271	0.01	0.01	0.21	0.2	20.5	0.195	0.000657	0.01	0.01	0.2	0.19	19.5	0.185	0.00073	47.46	20.5	19.5	0.195	3R_20821542_20821600_FBgn0038829_-	TATGTGAGT	TTAACCCACACATATTGCAGCAA	5.56	6.03	58
3R_21482462_21482518_FBgn0038889_+	Fancm	0.24	0.22	0.41	0.44	1.85	0.195	0.008439	0.2	0.19	0.34	0.39	1.87	0.17	0.02176	45.61	1.87	1.85	0.195	3R_21482462_21482518_FBgn0038889_+	GAGGTATTT	CTCACAGTTTGGATCCTCAGGAT	7.63	4.68	56
3R_25309709_25309761_FBgn0051099_-	CG31099	0.01	0	0.16	0.24	40	0.195	0.040177	0.01	0	0.16	0.21	37	0.18	0.019478	22.64	40	37	0.195	3R_25309709_25309761_FBgn0051099_-	CTGGTATTA	AATCGGTGAATGGTTTTCAGCCT	2.14	2.4	52
3R_28501872_28502244_FBgn0013813_+	Dhc98D	0.01	0	0.12	0.16	28	0.135	0.022534	0.01	0.02	0.2	0.22	14	0.195	0.003271	46.38	28	14	0.195	3R_28501872_28502244_FBgn0013813_+	CTGGTAGGT	CCGGGTGCGATGAATAACAGCAC	8.37	0.14	372
3R_4252815_4252875_FBgn0250821_-	CG14644	0.36	0.4	0.55	0.6	1.51	0.195	0.025913	0.34	0.36	0.49	0.48	1.39	0.135	0.006789	39.34	1.51	1.39	0.195	3R_4252815_4252875_FBgn0250821_-	CAAGTAAAT	AGCAATTTGCGATTTCATAGGTG	4.44	5.56	60
2L_16179086_16179142_FBgn0264350_-	CR43806	0.08	0.02	0.25	0.23	4.8	0.19	0.026601	0.06	0.02	0.22	0.21	5.38	0.175	0.013595	29.82	5.38	4.8	0.19	2L_16179086_16179142_FBgn0264350_-	GAGGTGAAA	TAACTTACAAGTCTTTTTAGTTC	2.91	0	56
2L_8214488_8214671_FBgn0032002_+	CG8353	0.05	0.06	0.11	0.13	2.18	0.065	0.028334	0.1	0.08	0.29	0.27	3.11	0.19	0.005495	32.07	3.11	2.18	0.19	2L_8214488_8214671_FBgn0032002_+	TGGGTAAGA	TGCATTGTTTCGACTTCCAGATC	8.91	8.88	183
2R_24664457_24664507_FBgn0035046_+	ND-19	0.31	0.26	0.48	0.47	1.67	0.19	0.017533	0.18	0.15	0.27	0.28	1.67	0.11	0.020042	17.65	1.67	1.67	0.19	2R_24664457_24664507_FBgn0035046_+	AACGTAAAA	TTTTTTATTGAATTTCATAGCCT	-2.68	6.34	50
2R_6137814_6137988_FBgn0033063_+	CG14589	0.04	0.02	0.2	0.24	7.33	0.19	0.013569	0.04	0.03	0.14	0.17	4.43	0.12	0.016922	32.57	7.33	4.43	0.19	2R_6137814_6137988_FBgn0033063_+	CAGGTTAAC	ATTCATTGTTCTTTGCTCAGAAA	1.61	5.24	174
3L_11583217_11583267_FBgn0052086_-	CG32086	0	0.02	0.16	0.15	15.5	0.145	0.005893	0.13	0.15	0.36	0.3	2.36	0.19	0.026601	25.49	15.5	2.36	0.19	3L_11583217_11583267_FBgn0052086_-	AAAGTAAGT	TAGTTTTAGACTGTCTGTAGGTA	9.72	1.18	50
3L_1465823_1466489_FBgn0004635_+	rho	0	0.04	0.2	0.22	10.5	0.19	0.013569	0	0	0.08	0.11	NA	0.095	0.024036	42.13	10.5	10.5	0.19	3L_1465823_1466489_FBgn0004635_+	GAGGTAAGC	TGCGTCTCTGTCCATTTTAGATT	9.85	12	666
3L_1804356_1804416_FBgn0261562_+	CG42676	0	0	0.19	0.19	NA	0.19	0	0	0	0.16	0.14	NA	0.15	0.004415	34.43	0	0	0.19	3L_1804356_1804416_FBgn0261562_+	GAAGTGAGA	CCTTAATAATTCTCTTAAAGAAC	3.22	3.79	60
3R_10764374_10764442_FBgn0037831_+	Cap-H2	0	0	0.17	0.21	NA	0.19	0.0109	0	0	0.15	0.14	NA	0.145	0.001187	28.99	0	0	0.19	3R_10764374_10764442_FBgn0037831_+	GCAGTAAGT	CATATGTGTTTTATTTTTAGCGC	9.07	8.98	68
3R_21130986_21131061_FBgn0038860_+	Ice2	0.98	0.92	1.14	1.14	1.2	0.19	0.024036	0.86	0.83	0.94	0.96	1.12	0.105	0.028236	47.37	1.2	1.12	0.19	3R_21130986_21131061_FBgn0038860_+	GTGGTACGA	CCTTCTCCGGGCTGCCACAGCTG	5.95	5.84	75
3R_29064613_29097231_FBgn0039633_+	CG11873	0	0	0.14	0.13	NA	0.135	0.001369	0.29	0.26	0.43	0.5	1.69	0.19	0.037898	41.94	1.69	1.69	0.19	3R_29064613_29097231_FBgn0039633_+	CAGGTGAGA	TCGCTTTGTTTCGTTTCCAGGAA	9.22	10.96	32618
3R_29748770_29748823_FBgn0020235_-	ATPsyngamma	0.13	0.17	0.35	0.33	2.27	0.19	0.013569	0.2	0.19	0.25	0.26	1.31	0.06	0.013606	40.74	2.27	1.31	0.19	3R_29748770_29748823_FBgn0020235_-	AAGGTAGGT	CGAGCTAATTTTCGCGACAGGGA	10.29	5.02	53
3R_7219476_7219530_FBgn0037486_-	CG14605	0	0	0.11	0.16	NA	0.135	0.032625	0	0	0.16	0.22	NA	0.19	0.024036	43.64	0	0	0.19	3R_7219476_7219530_FBgn0037486_-	TGGGTAAGA	TACCTGATGATTTTTCCCAGTGT	8.91	4.52	54
3R_7219476_7219534_FBgn0037486_-	CG14605	0.36	0.35	0.52	0.46	1.38	0.135	0.047191	0	0	0.16	0.22	NA	0.19	0.024036	45.76	1.38	1.38	0.19	3R_7219476_7219534_FBgn0037486_-	TACGTGGGT	TACCTGATGATTTTTCCCAGTGT	1.77	4.52	58
X_16394259_16394315_FBgn0004367_+	mei-41	0	0	0.18	0.2	NA	0.19	0.002759	0	0	0.1	0.11	NA	0.105	0.00226	42.11	0	0	0.19	X_16394259_16394315_FBgn0004367_+	GCGGTGCGT	TTTGACCGGTCTGTTTGCAGCTT	8.66	9.69	56
X_1709440_1709504_FBgn0025378_-	CG3795	0	0	0.18	0.2	NA	0.19	0.002759	0.01	0.01	0.2	0.2	20	0.19	0	52.31	20	20	0.19	X_1709440_1709504_FBgn0025378_-	CAGGTGAGC	GCTCCCATCCCCTTCCGCAGTTC	9.6	7.32	64
X_19494837_19494899_FBgn0040890_-	ksh	0.06	0.06	0.27	0.23	4.17	0.19	0.0109	0.05	0.07	0.23	0.21	3.67	0.16	0.007722	52.38	4.17	3.67	0.19	X_19494837_19494899_FBgn0040890_-	ATGGTTTGA	AGCACCGTTTCCCTCCACAGAGC	1.1	10.28	62
X_21117405_21117462_FBgn0031161_+	CG15445	0.49	0.48	0.62	0.67	1.33	0.16	0.024463	0.58	0.63	0.8	0.79	1.31	0.19	0.017533	44.83	1.33	1.31	0.19	X_21117405_21117462_FBgn0031161_+	CTCGTAAAT	GACGCGTCAGTTTCAGCCAGTTC	-3.14	-5.83	57
2L_12058767_12058829_FBgn0027505_-	Rab3-GAP	0	0	0.18	0.19	NA	0.185	0.00073	0	0	0.16	0.17	NA	0.165	0.000917	49.21	0	0	0.185	2L_12058767_12058829_FBgn0027505_-	CTGGTAAGT	TTCTCACGCCGCTTACGCAGAAG	10.65	3.85	62
2L_12915638_12915702_FBgn0040508_+	ACXC	0	0	0.19	0.18	NA	0.185	0.00073	0.01	0.02	0.16	0.18	11.33	0.155	0.005163	33.85	11.33	11.33	0.185	2L_12915638_12915702_FBgn0040508_+	TTGGTCTGT	TTGCTTGCTATCTTTTACAGTTG	0.67	9.11	64
2L_14547813_14547866_FBgn0250844_-	CG4218	0.03	0.03	0.19	0.2	6.5	0.165	0.000917	0.01	0.01	0.19	0.2	19.5	0.185	0.00073	44.44	19.5	6.5	0.185	2L_14547813_14547866_FBgn0250844_-	ATGGTAAGG	CCATGTAGGTTAATCCAAAGCCT	9.33	-2.19	53
2L_16900043_16900100_FBgn0051805_-	CG31805	0.01	0.01	0.18	0.21	19.5	0.185	0.00651	0.49	0.47	0.61	0.66	1.32	0.155	0.028876	37.93	19.5	1.32	0.185	2L_16900043_16900100_FBgn0051805_-	ACGGTAAGT	CTGAAACTTTTCAAAGAAAGCGA	11.81	-5.03	57
2L_6488373_6488424_FBgn0031821_-	KFase	0.18	0.19	0.33	0.41	2	0.185	0.044346	0.11	0.1	0.23	0.28	2.43	0.15	0.027694	48.08	2.43	2	0.185	2L_6488373_6488424_FBgn0031821_-	AGCGTAAGA	ATTTAAACGTAAAATTCCAGATG	6.21	3.53	51
2R_21689223_21689283_FBgn0034655_+	CG10307	0.02	0.03	0.2	0.22	8.4	0.185	0.003632	0.05	0.06	0.23	0.25	4.36	0.185	0.003632	45.9	8.4	4.36	0.185	2R_21689223_21689283_FBgn0034655_+	AAGGTGGCA	CACAATCCCTTGACTCACAGATT	1.02	6.44	60
2R_24596340_24596395_FBgn0020521_+	pio	0	0	0.14	0.15	NA	0.145	0.001187	0	0	0.2	0.17	NA	0.185	0.00651	37.5	0	0	0.185	2R_24596340_24596395_FBgn0020521_+	TGGGTAAGA	ACAACACTCTGTTCCTTCAGCTG	8.91	8.07	55
2R_25077307_25077369_FBgn0004919_-	gol	0.02	0.06	0.18	0.19	4.62	0.145	0.019621	0	0.06	0.21	0.22	7.17	0.185	0.025978	39.68	7.17	4.62	0.185	2R_25077307_25077369_FBgn0004919_-	CAAGTGAGC	AAAGTACACTATTTTCCCAGGAA	6.39	3.54	62
3L_10266271_10266326_FBgn0011569_-	can	0	0	0.15	0.22	NA	0.185	0.033979	0	0	0.14	0.22	NA	0.18	0.046002	35.71	0	0	0.185	3L_10266271_10266326_FBgn0011569_-	AACGTAAGT	TTCTGGCACACGAATCGCAGTGA	10.74	0.9	55
3L_10626830_10626894_FBgn0085267_+	CG34238	0.03	0.01	0.18	0.23	10.25	0.185	0.020533	0.03	0.03	0.14	0.15	4.83	0.115	0.001885	38.46	10.25	4.83	0.185	3L_10626830_10626894_FBgn0085267_+	GGGGTATAT	TATCCTTCGCTTAATTACAGCGC	2.46	7.21	64
3L_12795089_12795162_FBgn0261674_+	CG42709	0.01	0.04	0.21	0.21	8.4	0.185	0.00651	0.03	0.06	0.2	0.25	5	0.18	0.025245	45.95	8.4	5	0.185	3L_12795089_12795162_FBgn0261674_+	GTGGTGAGC	CTCCCATTGTTCGCATTTAGCCA	6.64	6.31	73
3L_5234722_5234769_FBgn0035598_+	CG4669	0	0	0.14	0.16	NA	0.15	0.004415	0.01	0	0.18	0.2	38	0.185	0.003632	20.83	38	38	0.185	3L_5234722_5234769_FBgn0035598_+	ACCGTAAGT	TTTCTATAATCCCTTTAAAGTCT	10.43	5.47	47
3L_9416876_9416928_FBgn0035988_-	CG3982	0.01	0	0.18	0.19	37	0.18	0.00154	0.01	0	0.18	0.2	38	0.185	0.003632	41.51	38	37	0.185	3L_9416876_9416928_FBgn0035988_-	AATGTAAGA	ACCCAAACGATAAATCACAGCCA	5.55	-0.8	52
3L_9628821_9630061_FBgn0036020_+	CG8336	0.02	0.02	0.21	0.2	10.25	0.185	0.00073	0.04	0.05	0.19	0.19	4.22	0.145	0.001187	33.84	10.25	4.22	0.185	3L_9628821_9630061_FBgn0036020_+	AAGGTAAGC	TTGTCTACTGCGAGTTGCAGGTG	10.22	0.4	1240
3R_20043047_20043102_FBgn0064119_+	CG33934	0.01	0.01	0.18	0.17	17.5	0.165	0.000917	0.01	0.01	0.2	0.19	19.5	0.185	0.00073	26.79	19.5	17.5	0.185	3R_20043047_20043102_FBgn0064119_+	GCCGTAAGT	GGATCAAAGTAATTTCTTAGGAG	10.11	-1.77	55
3R_20043047_20043102_FBgn0260466_+	Indy-2	0.01	0.01	0.18	0.17	17.5	0.165	0.000917	0.01	0.01	0.2	0.19	19.5	0.185	0.00073	26.79	19.5	17.5	0.185	3R_20043047_20043102_FBgn0260466_+	GCCGTAAGT	GGATCAAAGTAATTTCTTAGGAG	10.11	-1.77	55
3R_7059492_7059549_FBgn0019828_+	dj	0	0	0.15	0.15	NA	0.15	0	0	0	0.18	0.19	NA	0.185	0.00073	37.93	0	0	0.185	3R_7059492_7059549_FBgn0019828_+	AAGGTATGC	CTGTTAATACTACTTCACAACCG	9.55	-3.55	57
X_1872907_1872972_FBgn0023517_-	Pgam5	0.07	0.04	0.24	0.24	4.36	0.185	0.00651	0.05	0.03	0.2	0.18	4.75	0.15	0.008772	45.45	4.75	4.36	0.185	X_1872907_1872972_FBgn0023517_-	TCTGTAAGT	CGGCTTTCATTTCACTGCAGCAG	7.96	6.55	65
2L_12174525_12174575_FBgn0263088_-	CR43356	0.05	0.08	0.24	0.25	3.77	0.18	0.007628	0.09	0.06	0.21	0.21	2.8	0.135	0.012122	29.41	3.77	2.8	0.18	2L_12174525_12174575_FBgn0263088_-	AAGGCAATA	TTAACTGCTGGCTTTTTCAGATG	0.73	10.25	50
2L_2046012_2046065_FBgn0028952_+	Kebab	0.06	0.05	0.23	0.24	4.27	0.18	0.00154	0.1	0.07	0.24	0.26	2.94	0.165	0.011728	35.19	4.27	2.94	0.18	2L_2046012_2046065_FBgn0028952_+	CCGGTAAAG	AACTTCATTGCTATTCTCAGTAG	6.84	1.76	53
2L_20815311_20815415_FBgn0053322_-	CG33322	0.02	0.02	0.17	0.23	10	0.18	0.026671	0.03	0.02	0.2	0.2	8	0.175	0.000815	39.05	10	8	0.18	2L_20815311_20815415_FBgn0053322_-	TAAGTGAGT	AAAGAGTACAAATCCCCCAGGGA	6.43	0.98	104
2L_276904_276958_FBgn0086855_-	CG17078	0.03	0.01	0.19	0.21	10	0.18	0.006116	0.03	0.01	0.17	0.18	8.75	0.155	0.005163	40	10	8.75	0.18	2L_276904_276958_FBgn0086855_-	CCGGTTAGC	GGTTAACGTTTACCTTTTAGCCG	1.83	4.34	54
2L_2856569_2856630_FBgn0015521_+	RpS21	0.26	0.26	0.37	0.39	1.46	0.12	0.006873	0.3	0.32	0.46	0.52	1.58	0.18	0.029505	51.61	1.58	1.46	0.18	2L_2856569_2856630_FBgn0015521_+	CAAGTGAGT	GCGCATTTTTCGCCTTGCAGGAA	9.1	9.77	61
2R_11988564_11988622_FBgn0033672_-	rho-7	0.07	0.07	0.23	0.27	3.57	0.18	0.012122	0.01	0	0.18	0.19	37	0.18	0.00154	52.54	37	3.57	0.18	2R_11988564_11988622_FBgn0033672_-	GGCGTAAGT	AACCCCACGTAAACTTACAGCCG	9.39	2.55	58
2R_22140194_22140261_FBgn0029084_+	gom	0	0.01	0.19	0.18	37	0.18	0.00154	0	0.01	0.2	0.15	35	0.17	0.02176	38.24	37	35	0.18	2R_22140194_22140261_FBgn0029084_+	GATGTGAGT	AAACCTTCCTGAATCCCCAGTGC	7.77	6.39	67
2R_9582451_9582504_FBgn0033427_-	Smyd4-1	0.02	0.02	0.16	0.22	9.5	0.17	0.029759	0.01	0.02	0.17	0.22	13	0.18	0.019478	38.89	13	9.5	0.18	2R_9582451_9582504_FBgn0033427_-	TATGTACGT	TGTCTTTCCCAATCTTCCAGCTT	3.41	9.14	53
2R_9775334_9775394_FBgn0265105_+	CR44207	0.24	0.24	0.38	0.46	1.75	0.18	0.046002	0	0	0.1	0.1	NA	0.1	0	39.34	1.75	1.75	0.18	2R_9775334_9775394_FBgn0265105_+	AAAGTGAGT	AAAATGTTCTCGACTTGCAGTCA	8.4	6.13	60
2R_9821688_9821745_FBgn0050001_-	CG30001	0.04	0	0.19	0.18	9.25	0.165	0.015254	0.04	0	0.18	0.22	10	0.18	0.023813	29.31	10	9.25	0.18	2R_9821688_9821745_FBgn0050001_-	AAAGTATAT	AGTGATCTTTTCCTTTGCAGAGT	1.45	9.81	57
3L_15144550_15144668_FBgn0036484_+	Pex3	0.02	0.01	0.2	0.19	13	0.18	0.00154	0.02	0.03	0.15	0.17	6.4	0.135	0.006789	52.94	13	6.4	0.18	3L_15144550_15144668_FBgn0036484_+	CTGGTAATC	TATTTATTAACCTCGAACAGGTC	3.45	6.12	118
3L_7467421_7467477_FBgn0035786_+	Tsp66A	0.19	0.19	0.39	0.35	1.95	0.18	0.012122	0.02	0.01	0.08	0.06	4.67	0.055	0.038926	43.86	4.67	1.95	0.18	3L_7467421_7467477_FBgn0035786_+	TTCGTAGGT	AAAGGTGTTCCCACCCACAGATT	3.61	8.49	56
3L_7467421_7467477_FBgn0261536_+	CG42660	0.19	0.19	0.39	0.35	1.95	0.18	0.012122	0.02	0.01	0.08	0.06	4.67	0.055	0.038926	43.86	4.67	1.95	0.18	3L_7467421_7467477_FBgn0261536_+	TTCGTAGGT	AAAGGTGTTCCCACCCACAGATT	3.61	8.49	56
3L_7467421_7467477_FBgn0261537_+	CG42661	0.19	0.19	0.39	0.35	1.95	0.18	0.012122	0.02	0.01	0.08	0.06	4.67	0.055	0.038926	43.86	4.67	1.95	0.18	3L_7467421_7467477_FBgn0261537_+	TTCGTAGGT	AAAGGTGTTCCCACCCACAGATT	3.61	8.49	56
3R_12030954_12031008_FBgn0051358_-	CG31358	0.08	0.08	0.24	0.27	3.19	0.175	0.007267	0.05	0.08	0.22	0.27	3.77	0.18	0.025245	40	3.77	3.19	0.18	3R_12030954_12031008_FBgn0051358_-	CTTGTAAGC	TGTTGGTACTCCTTCCTCAGGAT	4.33	7.75	54
3R_12030954_12031008_FBgn0260230_-	CG42504	0.08	0.08	0.24	0.27	3.19	0.175	0.007267	0.05	0.08	0.22	0.27	3.77	0.18	0.025245	40	3.77	3.19	0.18	3R_12030954_12031008_FBgn0260230_-	CTTGTAAGC	TGTTGGTACTCCTTCCTCAGGAT	4.33	7.75	54
3R_12030954_12031008_FBgn0260231_-	CG42505	0.08	0.08	0.24	0.27	3.19	0.175	0.007267	0.05	0.08	0.22	0.27	3.77	0.18	0.025245	40	3.77	3.19	0.18	3R_12030954_12031008_FBgn0260231_-	CTTGTAAGC	TGTTGGTACTCCTTCCTCAGGAT	4.33	7.75	54
3R_13191804_13191852_FBgn0038125_+	CG8141	0.07	0.05	0.26	0.22	4	0.18	0.015084	0.05	0.03	0.22	0.18	5	0.16	0.018977	34.69	5	4	0.18	3R_13191804_13191852_FBgn0038125_+	AAGGTGAGG	TTAATGTTCAAGGTGAGCAGGTG	9.16	-3.75	48
3R_15370567_15370617_FBgn0038332_-	CG6136	0.03	0.01	0.16	0.2	9	0.16	0.018977	0.02	0.01	0.17	0.22	13	0.18	0.019478	25.49	13	9	0.18	3R_15370567_15370617_FBgn0038332_-	AGAGTAAGC	ATAAACTAATATATTTTTAGGCG	6.31	4.89	50
3R_15950690_15950751_FBgn0051088_-	CG31088	0	0.01	0.18	0.19	37	0.18	0.00154	0	0	0.17	0.18	NA	0.175	0.000815	33.87	37	37	0.18	3R_15950690_15950751_FBgn0051088_-	ATCGTAAGT	CTTCCATTTCCTTGGAGCAGAGC	10.44	4.7	61
3R_18153406_18153458_FBgn0038567_+	CG14316	0	0	0.18	0.14	NA	0.16	0.015268	0	0	0.16	0.2	NA	0.18	0.012122	26.42	0	0	0.18	3R_18153406_18153458_FBgn0038567_+	AACGTAAGT	TGAAAGTTTTTAACTTTCAGTTA	10.74	5.93	52
3R_5569972_5570027_FBgn0041191_+	Rheb	0.03	0.04	0.23	0.2	6.14	0.18	0.007628	0.05	0.03	0.2	0.19	4.88	0.155	0.005163	46.43	6.14	4.88	0.18	3R_5569972_5570027_FBgn0041191_+	GAGGCAAGT	CTAAGGTACTTCCTTCGCAGTCC	3.32	5.14	55
3R_6559248_6559306_FBgn0037454_-	CG1137	0	0	0.19	0.16	NA	0.175	0.007267	0	0	0.2	0.16	NA	0.18	0.012122	33.9	0	0	0.18	3R_6559248_6559306_FBgn0037454_-	AATGTGAGT	TTATCAGTTTGTACTCTCAGCGA	7.8	4.85	58
X_15859142_15859192_FBgn0065035_-	AlkB	0	0	0.19	0.17	NA	0.18	0.003072	0	0	0.1	0.16	NA	0.13	0.049346	39.22	0	0	0.18	X_15859142_15859192_FBgn0065035_-	AATGTAAGT	GATTTCTACATTCCCCTCAGAAT	8.62	7.79	50
X_18900568_18900730_FBgn0030976_+	CG7378	0	0	0.09	0.12	NA	0.105	0.019804	0.04	0.05	0.25	0.2	5	0.18	0.019478	38.04	5	5	0.18	X_18900568_18900730_FBgn0030976_+	AAGGTAGTT	ATTTACCCGAATCAATCAAGGAA	6.44	1.22	162
X_19618346_19618404_FBgn0027358_-	Tim9b	0	0.01	0.21	0.14	35	0.17	0.040634	0	0	0.2	0.16	NA	0.18	0.012122	50.85	35	35	0.18	X_19618346_19618404_FBgn0027358_-	AACGTAAGT	TCACTGGCCACGCCTTTCAGCTC	10.74	6.1	58
X_19618346_19618404_FBgn0031041_-	CG12788	0	0.01	0.21	0.14	35	0.17	0.040634	0	0	0.2	0.16	NA	0.18	0.012122	50.85	35	35	0.18	X_19618346_19618404_FBgn0031041_-	AACGTAAGT	TCACTGGCCACGCCTTTCAGCTC	10.74	6.1	58
X_528484_528544_FBgn0024983_-	CG4293	0.04	0	0.22	0.18	10	0.18	0.023813	0.04	0.01	0.16	0.12	5.6	0.115	0.044153	31.15	10	5.6	0.18	X_528484_528544_FBgn0024983_-	TAGGTGAGG	TTATTTTAATCTGTGGATAGATT	7.65	5.94	60
X_8251389_8251596_FBgn0017566_-	ND-75	0.1	0.09	0.3	0.25	2.89	0.18	0.019478	0.12	0.13	0.27	0.29	2.24	0.155	0.005163	50.48	2.89	2.24	0.18	X_8251389_8251596_FBgn0017566_-	TCGGTAGGT	TGGTTACCATCTCGTTGCAGAAA	9.09	8.08	207
X_894518_894589_FBgn0029539_+	CG11663	0.05	0.06	0.22	0.25	4.27	0.18	0.007628	0.06	0.08	0.21	0.23	3.14	0.15	0.008772	22.22	4.27	3.14	0.18	X_894518_894589_FBgn0029539_+	TACGTTAGT	TTGTGATATCTAAAAAAAAGTAC	-1.77	-2.74	71
X_894518_894602_FBgn0029539_+	CG11663	0.05	0.06	0.22	0.25	4.27	0.18	0.007628	0.25	0.27	0.35	0.36	1.37	0.095	0.013569	25.88	4.27	1.37	0.18	X_894518_894602_FBgn0029539_+	TACGTTAGT	AAAAAAGTACTATCCCCTAGACT	-1.77	3.28	84
2L_10907763_10907827_FBgn0032314_-	CG7309	0.03	0.03	0.19	0.22	6.83	0.175	0.007267	0.02	0.03	0.19	0.21	8	0.175	0.004057	35.38	8	6.83	0.175	2L_10907763_10907827_FBgn0032314_-	GGGGTGATT	GTTGCAAACTACTTTTCCAGGTC	1.65	6.46	64
2L_1184255_1184322_FBgn0031321_+	Tgt	0.04	0.04	0.19	0.21	5	0.16	0.003884	0.04	0.07	0.25	0.21	4.18	0.175	0.019804	45.59	5	4.18	0.175	2L_1184255_1184322_FBgn0031321_+	AAGGTGAGC	TTACCAACTCTCCTAAACAGGCA	9.6	8.6	67
2L_20924112_20924168_FBgn0053318_+	CR33318	0.02	0.04	0.19	0.22	6.83	0.175	0.010446	0.03	0.05	0.18	0.22	5	0.16	0.018977	36.84	6.83	5	0.175	2L_20924112_20924168_FBgn0053318_+	AGGGTAAAA	GTATTAATCCCACATTGCAGCTG	4.51	6.49	56
2L_5047480_5047542_FBgn0053995_+	CG33995	0.07	0.06	0.19	0.23	3.23	0.145	0.019621	0.08	0.1	0.25	0.28	2.94	0.175	0.010446	38.1	3.23	2.94	0.175	2L_5047480_5047542_FBgn0053995_+	TGGGTAACA	GAGTTTTAATCTGACGGCAGGCC	3.35	2.78	62
2L_5047480_5047542_FBgn0264742_+	CG44000	0.07	0.06	0.19	0.23	3.23	0.145	0.019621	0.08	0.1	0.25	0.28	2.94	0.175	0.010446	38.1	3.23	2.94	0.175	2L_5047480_5047542_FBgn0264742_+	TGGGTAACA	GAGTTTTAATCTGACGGCAGGCC	3.35	2.78	62
2L_5047480_5047542_FBgn0264743_+	CG44001	0.07	0.06	0.19	0.23	3.23	0.145	0.019621	0.08	0.1	0.25	0.28	2.94	0.175	0.010446	38.1	3.23	2.94	0.175	2L_5047480_5047542_FBgn0264743_+	TGGGTAACA	GAGTTTTAATCTGACGGCAGGCC	3.35	2.78	62
2R_12936261_12936324_FBgn0033784_-	SCCRO3	0.87	0.87	0.94	0.96	1.09	0.08	0.015268	0.81	0.78	0.96	0.98	1.22	0.175	0.010446	48.44	1.22	1.09	0.175	2R_12936261_12936324_FBgn0033784_-	CATGTATGT	AATAACAACAGCAATCGCAGTGA	5.71	-7.01	63
2R_13222230_13222343_FBgn0043010_-	Fsn	0.08	0.08	0.27	0.24	3.19	0.175	0.007267	0.22	0.24	0.36	0.37	1.59	0.135	0.006789	44.74	3.19	1.59	0.175	2R_13222230_13222343_FBgn0043010_-	CAGGTGAGC	GGGAAAATGACAATCAACAGGAA	9.6	-0.18	113
2R_14091376_14091447_FBgn0259184_+	CG42288	0.01	0.01	0.16	0.21	18.5	0.175	0.019804	0.01	0.01	0.12	0.17	14.5	0.135	0.032625	25	18.5	14.5	0.175	2R_14091376_14091447_FBgn0259184_+	AATGTATGT	AATACCTCATAATTTTGTAGAAC	5.87	6.43	71
2R_18684757_18684811_FBgn0265625_-	CG44433	0.09	0.11	0.28	0.26	2.7	0.17	0.006849	0.05	0.05	0.23	0.22	4.5	0.175	0.000815	25.45	4.5	2.7	0.175	2R_18684757_18684811_FBgn0265625_-	GAGGTAAAT	GCACCTTTTTATTACCATAGGCT	8.39	7.56	54
2R_22709326_22709378_FBgn0050275_+	CG30275	0.02	0.01	0.19	0.19	12.67	0.175	0.000815	0.03	0.01	0.18	0.21	9.75	0.175	0.010446	47.17	12.67	9.75	0.175	2R_22709326_22709378_FBgn0050275_+	AGAGTGAGT	CATAACATGGGTTTATCTAGAAC	7.36	3.54	52
2R_8592585_8592641_FBgn0262812_+	CG43183	0	0	0.17	0.18	NA	0.175	0.000815	0.01	0.02	0.19	0.17	12	0.165	0.00456	26.32	12	12	0.175	2R_8592585_8592641_FBgn0262812_+	CGGGTGAGA	ATACTTATGATTTGATCTAGTTA	7.62	4.13	56
3L_13354126_13354185_FBgn0036348_+	CG17687	0.08	0.04	0.22	0.25	3.92	0.175	0.019804	0.05	0.03	0.12	0.12	3	0.08	0.015268	38.33	3.92	3	0.175	3L_13354126_13354185_FBgn0036348_+	TGTGTAAGT	AATCTGTGCCCAAACGGAAGTAA	7.65	-5.11	59
3L_849322_849379_FBgn0035168_+	cep290	0.01	0	0.17	0.19	36	0.175	0.004057	0	0	0.15	0.18	NA	0.165	0.008163	32.76	36	36	0.175	3L_849322_849379_FBgn0035168_+	CACGTAATG	TAAAAGTTTTAAACATGCAGGAC	2.3	3.63	57
3R_14747126_14751120_FBgn0038257_-	smp-30	0.06	0.02	0.21	0.22	5.38	0.175	0.013595	0	0.03	0.1	0.13	7.67	0.1	0.042174	35.89	7.67	5.38	0.175	3R_14747126_14751120_FBgn0038257_-	CAAGTGAGT	AACAATGTTCCCCATTTCAGATG	9.1	10.27	3994
3R_23052949_23053011_FBgn0039044_-	p53	0	0	0.14	0.21	NA	0.175	0.03775	0	0	0.11	0.08	NA	0.095	0.024036	34.92	0	0	0.175	3R_23052949_23053011_FBgn0039044_-	AACGTGAGT	TTTAATATTATTCCCCGCAGTCC	9.54	8.51	62
3R_23403564_23403616_FBgn0039077_-	CG17380	0.01	0	0.19	0.17	36	0.175	0.004057	0.01	0	0.18	0.17	35	0.17	0.001726	28.3	36	35	0.175	3R_23403564_23403616_FBgn0039077_-	ATGGTAAGT	TAGTAAATCTTTATTTTAAGAGA	11.01	2.67	52
3R_30650175_30650237_FBgn0085462_+	CG34433	0.85	0.86	1.01	1	1.18	0.15	0.002215	0.84	0.9	1.05	1.04	1.2	0.175	0.028901	42.86	1.2	1.18	0.175	3R_30650175_30650237_FBgn0085462_+	ACGGTGGCT	TGGTGGTGACCCTCTTGCAGAGC	0.63	6.68	62
3R_4876732_4876802_FBgn0020280_-	laf	0.39	0.41	0.55	0.59	1.43	0.17	0.016865	0.33	0.33	0.49	0.52	1.53	0.175	0.007267	39.44	1.53	1.43	0.175	3R_4876732_4876802_FBgn0020280_-	AGAGTAAGA	TTTTTAACTATGGTCCTCAGGAC	5.73	6.67	70
3R_7084125_7084182_FBgn0037470_-	Tailor	0.02	0.02	0.17	0.19	9	0.16	0.003884	0.02	0.02	0.16	0.23	9.75	0.175	0.03775	48.28	9.75	9	0.175	3R_7084125_7084182_FBgn0037470_-	TGAGTAAGC	TTGCATTCGCTCCCTTGCAGCTC	5.78	9.55	57
X_12107302_12107360_FBgn0030376_+	CG2750	0	0	0.17	0.18	NA	0.175	0.000815	0.02	0.01	0.13	0.14	9	0.12	0.003454	40.68	9	9	0.175	X_12107302_12107360_FBgn0030376_+	GAGGTGAGT	TTACCCAAGGATTTTCACAGTAG	10.03	-2.85	58
X_15929085_15929172_FBgn0053180_-	Ranbp16	0.02	0.03	0.2	0.2	8	0.175	0.000815	0.05	0.04	0.15	0.15	3.33	0.105	0.00226	26.14	8	3.33	0.175	X_15929085_15929172_FBgn0053180_-	CGGGTATGT	TAATAAGTAAATTCCTACAGAAA	8.79	2.7	87
X_21313885_21313939_FBgn0031171_-	CG1801	0.05	0.03	0.21	0.22	5.38	0.175	0.004057	0	0	0.15	0.13	NA	0.14	0.005063	30.91	5.38	5.38	0.175	X_21313885_21313939_FBgn0031171_-	TTGGTGAGT	TAACAAATAAATATATTTAGGCC	9.27	3.12	54
X_5614174_5614232_FBgn0085464_-	CG34435	0	0	0.14	0.17	NA	0.155	0.009236	0	0	0.15	0.2	NA	0.175	0.019804	50.85	0	0	0.175	X_5614174_5614232_FBgn0085464_-	CGGGTAAGT	GTGTGCCACCATTTGTTAAGCCC	10.75	1.45	58
2L_12928718_12928777_FBgn0040506_+	ACXE	0	0	0.12	0.15	NA	0.135	0.012122	0	0	0.16	0.18	NA	0.17	0.003442	26.67	0	0	0.17	2L_12928718_12928777_FBgn0040506_+	TCGGTGAGT	TATTACAATATATTTCTTAGTGG	11.11	3.98	59
2L_16982222_16982270_FBgn0265579_-	CG44406	0.17	0.18	0.31	0.31	1.77	0.135	0.001369	0.16	0.14	0.33	0.31	2.13	0.17	0.006849	26.53	2.13	1.77	0.17	2L_16982222_16982270_FBgn0265579_-	TTGGTTGGC	ATAATTTGATTCTTTTGCAGTTT	-1.32	7.4	48
2R_12305999_12306061_FBgn0061197_-	CG13164	0.04	0.04	0.2	0.22	5.25	0.17	0.003442	0	0	0.16	0.17	NA	0.165	0.000917	39.68	5.25	5.25	0.17	2R_12305999_12306061_FBgn0061197_-	GTAGTAAGT	ATGCTCGTTATCCTTGTTAGGTA	8.01	6.67	62
2R_24667125_24667183_FBgn0260456_-	CG4806	0	0.03	0.17	0.16	11	0.15	0.010929	0	0	0.17	0.17	NA	0.17	0	32.2	11	11	0.17	2R_24667125_24667183_FBgn0260456_-	TCGGTAAGA	TCCAATTGATAATCCTCTAGGTT	10.53	6.24	58
2R_6138266_6138317_FBgn0033063_+	CG14589	0.01	0.01	0.14	0.18	16	0.15	0.017317	0.01	0.01	0.15	0.21	18	0.17	0.029759	28.85	18	16	0.17	2R_6138266_6138317_FBgn0033063_+	AAGGTGAGT	AATCGTTGTCTTTTTCTTAGGCA	10.47	7.63	51
2R_8090883_8090935_FBgn0028561_+	sut3	0.08	0.09	0.24	0.25	2.88	0.16	0.001947	0.12	0.11	0.29	0.28	2.48	0.17	0.001726	49.06	2.88	2.48	0.17	2R_8090883_8090935_FBgn0028561_+	CAGGTTGAT	TATATCTTCCGATCCCACAGAGA	3.82	8.59	52
2R_8625576_8625627_FBgn0022027_+	Vps25	0.05	0.01	0.18	0.22	6.67	0.17	0.026583	0.05	0.02	0.16	0.18	4.86	0.135	0.017369	55.77	6.67	4.86	0.17	2R_8625576_8625627_FBgn0022027_+	TACGTGAGT	GACTAACACCCGGGTTTCAGACT	7.77	2.97	51
3L_15554223_15554289_FBgn0087035_+	AGO2	0.05	0.01	0.21	0.19	6.67	0.17	0.016865	0.04	0.01	0.15	0.13	5.6	0.115	0.023704	46.27	6.67	5.6	0.17	3L_15554223_15554289_FBgn0087035_+	ATAGTGAGT	CTTTCCAATTACCACCCCAGAGA	6.97	5.85	66
3L_21406519_21406581_FBgn0002842_-	sa	0.05	0.03	0.18	0.22	5	0.16	0.018977	0.06	0.04	0.22	0.22	4.4	0.17	0.003442	36.51	5	4.4	0.17	3L_21406519_21406581_FBgn0002842_-	GCAGTAAGT	TAATCAATGTGTTCCTCGAGAAT	9.07	1.4	62
3L_584957_585016_FBgn0035144_-	Kah	0	0	0.17	0.17	NA	0.17	0	0	0	0.17	0.17	NA	0.17	0	31.67	0	0	0.17	3L_584957_585016_FBgn0035144_-	CAGGTGAGC	TAAGTCTATGTTCTTTAAAGATC	9.6	5.29	59
3L_7335876_7335937_FBgn0035766_-	eco	0.02	0	0.14	0.14	14	0.13	0.005865	0.03	0	0.16	0.21	12.33	0.17	0.028175	50	14	12.33	0.17	3L_7335876_7335937_FBgn0035766_-	CAGGTAAGA	TAAAATGTGCCTTCTTTCAGCTG	10.77	9.56	61
3R_12966477_12966552_FBgn0038097_-	CG14384	0.01	0.01	0.19	0.17	18	0.17	0.003442	0.01	0.01	0.15	0.16	15.5	0.145	0.001187	46.05	18	15.5	0.17	3R_12966477_12966552_FBgn0038097_-	CATGTAAGT	ACAATGTGGTTTGCATACAGTAC	8.31	4.07	75
3R_20326799_20326872_FBgn0038787_-	CG4360	0.03	0	0.17	0.2	12.33	0.17	0.015216	0.02	0	0.17	0.16	16.5	0.155	0.005163	50	16.5	12.33	0.17	3R_20326799_20326872_FBgn0038787_-	AGGGTGAGT	GCTTCGCTTACGGGCAACAGCGG	9.25	-1.91	73
3R_5375925_5375986_FBgn0037317_+	CG14667	0	0	0.2	0.14	NA	0.17	0.029759	0	0	0.15	0.1	NA	0.125	0.03775	41.94	0	0	0.17	3R_5375925_5375986_FBgn0037317_+	CAAGTAAGG	AACTTCCAATTTCATTTTAGAGC	7.66	7.29	61
3R_5578371_5578437_FBgn0023023_+	CRMP	0	0	0.17	0.17	NA	0.17	0	0.04	0	0.15	0.14	7.25	0.125	0.026138	26.87	7.25	7.25	0.17	3R_5578371_5578437_FBgn0023023_+	GTGGTACGT	TTGTTTCAAAATCTCTTCAGAGG	8.61	6.47	66
X_2065704_2065757_FBgn0029596_-	CG14054	0.02	0.01	0.17	0.2	12.33	0.17	0.00854	0.02	0.01	0.18	0.19	12.33	0.17	0.001726	48.15	12.33	12.33	0.17	X_2065704_2065757_FBgn0029596_-	AAGGTATTG	TCTAGTCTGTTCTTCCACAGTCG	7.76	7.74	53
X_477932_478012_FBgn0029522_+	CG13373	0.02	0	0.21	0.15	18	0.17	0.032904	0.02	0.01	0.16	0.11	9	0.12	0.042296	38.27	18	9	0.17	X_477932_478012_FBgn0029522_+	ATTGTGAGT	GACCATCATCTTATTTCCAGTGG	7.35	6.46	80
X_622359_622445_FBgn0016038_+	Vsp37A	0.04	0.05	0.19	0.24	4.78	0.17	0.02176	0.59	0.6	0.74	0.73	1.24	0.14	0.002541	48.28	4.78	1.24	0.17	X_622359_622445_FBgn0016038_+	AGGGTGAGT	CCCTGAAGGAGCTTCTTCAGATT	9.25	-4.37	86
2L_11099296_11099353_FBgn0032340_-	--	0	0	0.05	0.07	NA	0.06	0.026671	0	0	0.19	0.14	NA	0.165	0.022195	37.93	0	0	0.165	2L_11099296_11099353_FBgn0032340_-	GGGGTTCGT	AATGGCATTTACCTTAACAGCGC	0.98	7.54	57
2L_14547796_14547866_FBgn0250844_-	CG4218	0.03	0.03	0.19	0.2	6.5	0.165	0.000917	0.18	0.17	0.29	0.32	1.74	0.13	0.014473	45.07	6.5	1.74	0.165	2L_14547796_14547866_FBgn0250844_-	ATGGTAAGG	AAGCCTCATCTAAACCCTAGGTC	9.33	5.71	70
2L_20675571_20675636_FBgn0051678_-	CG31678	0.01	0	0.18	0.14	32	0.155	0.017234	0.06	0.05	0.22	0.22	4	0.165	0.000917	45.45	32	4	0.165	2L_20675571_20675636_FBgn0051678_-	GAGGTGAGC	AGTGGATTTTCCGATTGCAGCTG	8.7	6.06	65
2R_11896815_11897108_FBgn0260959_-	MCPH1	0.04	0.04	0.21	0.2	5.12	0.165	0.000917	0.03	0.02	0.12	0.13	5	0.1	0.004963	39.12	5.12	5	0.165	2R_11896815_11897108_FBgn0260959_-	AAGGTTGGT	AAAACCGCCTTCAATCCCAGGCC	8.46	6.44	293
2R_12637272_12637338_FBgn0011604_+	Iswi	0.01	0	0.15	0.15	30	0.145	0.001187	0.01	0	0.15	0.19	34	0.165	0.015254	32.84	34	30	0.165	2R_12637272_12637338_FBgn0011604_+	CGAGTGAGT	TGTACTTTTGTATTAAACAGTCA	8.49	6.87	66
2R_13209959_13210061_FBgn0050058_-	CG30058	0.06	0.06	0.16	0.19	2.92	0.115	0.016591	0.03	0.01	0.15	0.22	9.25	0.165	0.045381	24.27	9.25	2.92	0.165	2R_13209959_13210061_FBgn0050058_-	TTGGTAAAG	TAATAATTCAAAACCCACAGGTG	4.05	5.94	102
2R_13209959_13210061_FBgn0085264_-	CG34235	0.06	0.06	0.16	0.19	2.92	0.115	0.016591	0.03	0.01	0.15	0.22	9.25	0.165	0.045381	24.27	9.25	2.92	0.165	2R_13209959_13210061_FBgn0085264_-	TTGGTAAAG	TAATAATTCAAAACCCACAGGTG	4.05	5.94	102
2R_13209959_13210061_FBgn0085341_-	CG34312	0.06	0.06	0.16	0.19	2.92	0.115	0.016591	0.03	0.01	0.15	0.22	9.25	0.165	0.045381	24.27	9.25	2.92	0.165	2R_13209959_13210061_FBgn0085341_-	TTGGTAAAG	TAATAATTCAAAACCCACAGGTG	4.05	5.94	102
2R_16138439_16138766_FBgn0001124_+	Got1	0.01	0.01	0.16	0.19	17.5	0.165	0.008163	0.43	0.4	0.53	0.56	1.31	0.13	0.025609	34.15	17.5	1.31	0.165	2R_16138439_16138766_FBgn0001124_+	CAGGTAGGA	GTTTGGACTTGTTTCCCAAGCTA	9.79	3.74	327
2R_16417351_16417409_FBgn0029153_-	Menl-2	0.03	0.02	0.16	0.22	7.6	0.165	0.032337	0	0	0.11	0.15	NA	0.13	0.02286	30.51	7.6	7.6	0.165	2R_16417351_16417409_FBgn0029153_-	ACGGTGAGA	TTTCTAATTGGTTAATTAAGGTT	8.94	3.81	58
2R_16417351_16417409_FBgn0029154_-	Menl-1	0.03	0.02	0.16	0.22	7.6	0.165	0.032337	0	0	0.11	0.15	NA	0.13	0.02286	30.51	7.6	7.6	0.165	2R_16417351_16417409_FBgn0029154_-	ACGGTGAGA	TTTCTAATTGGTTAATTAAGGTT	8.94	3.81	58
2R_17767566_17767618_FBgn0034278_-	CG14488	0	0	0.15	0.14	NA	0.145	0.001187	0	0	0.17	0.16	NA	0.165	0.000917	37.74	0	0	0.165	2R_17767566_17767618_FBgn0034278_-	TCCGTAAGT	TAATCCGAATGGTCATGCAGCCA	10.27	1.74	52
2R_24899469_24899532_FBgn0035078_-	Tpc2	0.05	0.06	0.21	0.23	4	0.165	0.00456	0.05	0.04	0.18	0.18	4	0.135	0.001369	37.5	4	4	0.165	2R_24899469_24899532_FBgn0035078_-	TAGGTAAAT	TGGTTTATTTTGTACACCAGTAT	6.62	3.6	63
2R_4727735_4727793_FBgn0026401_-	Nipped-B	0	0.03	0.14	0.14	9.33	0.125	0.014096	0	0.04	0.2	0.17	9.25	0.165	0.022195	25.42	9.33	9.25	0.165	2R_4727735_4727793_FBgn0026401_-	TAGGTGGCG	AATGCATTTTTCTGTTTTAGTAT	-1.6	9.59	58
2R_8913571_8913709_FBgn0003074_-	Pgi	0.74	0.75	0.9	0.92	1.22	0.165	0.00456	0.65	0.64	0.81	0.8	1.25	0.16	0.001947	53.96	1.25	1.22	0.165	2R_8913571_8913709_FBgn0003074_-	TAAGTGAAG	CCTGCTTGGGATAACTGAAGTAA	-5.29	-2.39	138
2R_9822099_9822154_FBgn0050001_-	CG30001	0	0	0.18	0.15	NA	0.165	0.008163	0	0	0.14	0.14	NA	0.14	0	32.14	0	0	0.165	2R_9822099_9822154_FBgn0050001_-	CAGGTTTGT	CTAAATTATTACCCATTCAGATG	7.44	4.99	55
3L_21672657_21672926_FBgn0037115_+	CG11249	0.09	0.07	0.21	0.27	3	0.16	0.036913	0.01	0	0.15	0.19	34	0.165	0.015254	33.7	34	3	0.165	3L_21672657_21672926_FBgn0037115_+	TATGTGCGT	CCACAACTCCTTACTTTCAGTGG	1.54	5.44	269
3L_4040904_4040966_FBgn0263832_+	Rcd5	0.03	0.05	0.21	0.2	5.12	0.165	0.00456	0.07	0.07	0.2	0.23	3.07	0.145	0.010533	41.27	5.12	3.07	0.165	3L_4040904_4040966_FBgn0263832_+	AAGGTGAGA	CTCCTTTTGCATCGAAACAGTTC	8.68	6.63	62
3L_6202444_6202500_FBgn0035693_+	CG8219	0.01	0.03	0.15	0.22	9.25	0.165	0.045381	0.01	0.03	0.15	0.2	8.75	0.155	0.028876	36.84	9.25	8.75	0.165	3L_6202444_6202500_FBgn0035693_+	ATGGTAAGC	TGAACTCGACTCCTTTCAAGATG	9.26	2.9	56
3L_7248435_7248503_FBgn0012058_-	Cdc27	0	0.01	0.15	0.17	32	0.155	0.005163	0	0	0.15	0.18	NA	0.165	0.008163	46.38	32	32	0.165	3L_7248435_7248503_FBgn0012058_-	AAGGTATAG	CTTTCACCGTGTCCTTGCAGTGG	7.98	9.59	68
3R_13698039_13698090_FBgn0028487_-	f-cup	0.01	0	0.17	0.17	34	0.165	0.000917	0.01	0	0.16	0.18	34	0.165	0.00456	21.15	34	34	0.165	3R_13698039_13698090_FBgn0028487_-	ACGGTATGA	ATTTAAAATCCACATATTAGCTG	8.54	0.12	51
3R_16267163_16267222_FBgn0020399_+	Mst89B	0.03	0.01	0.18	0.17	8.75	0.155	0.005163	0.02	0.01	0.18	0.18	12	0.165	0.000917	33.33	12	8.75	0.165	3R_16267163_16267222_FBgn0020399_+	ACAGTGAGC	ACTAACTTTTCTTCGGTAAGTTC	4.69	2.06	59
3R_17088483_17088539_FBgn0038478_+	cal1	0.01	0	0.16	0.18	34	0.165	0.00456	0.02	0.03	0.17	0.2	7.4	0.16	0.009625	43.86	34	7.4	0.165	3R_17088483_17088539_FBgn0038478_+	GCGGTGAGT	TGGACGATATTGTTTTATAGGAT	10.49	6.81	56
3R_23766067_23766129_FBgn0039114_+	Lsd-1	0.03	0.05	0.19	0.22	5.12	0.165	0.011728	0.04	0.05	0.18	0.2	4.22	0.145	0.005893	49.21	5.12	4.22	0.165	3R_23766067_23766129_FBgn0039114_+	CAGGTTGGT	CTTCGAACCAAACCTTACAGAAA	8.08	4.01	62
4_783246_783301_FBgn0039923_-	MED26	0.03	0.03	0.14	0.15	4.83	0.115	0.001885	0.02	0.03	0.17	0.21	7.6	0.165	0.015254	26.79	7.6	4.83	0.165	4_783246_783301_FBgn0039923_-	CAGGTTGTT	TTGTACCACAATCTTTTCAGACA	1.87	6.05	55
X_13667137_13667195_FBgn0030506_-	Lig4	0.02	0	0.13	0.19	16	0.15	0.041685	0.03	0	0.16	0.2	12	0.165	0.022195	47.46	16	12	0.165	X_13667137_13667195_FBgn0030506_-	AAGGTGGGC	AATGAGACCGCTCTTTGCAGTTA	7.93	3.39	58
2L_10993674_10993742_FBgn0026147_+	CG16833	0	0	0.18	0.14	NA	0.16	0.015268	0.01	0.01	0.17	0.15	16	0.15	0.004415	34.78	16	16	0.16	2L_10993674_10993742_FBgn0026147_+	GAGGTGAGG	TAACATTTAATACAACACAGTAT	8.41	0.74	68
2R_11283606_11283683_FBgn0033607_-	CG9062	0.02	0.03	0.18	0.19	7.4	0.16	0.001947	0.01	0.02	0.16	0.16	10.67	0.145	0.001187	50	10.67	7.4	0.16	2R_11283606_11283683_FBgn0033607_-	CAGGTGAGT	ATTAAACCGTCGGACGCCAGGTT	10.67	2.2	77
2R_13160658_13160719_FBgn0020391_+	Nrk	0	0	0.14	0.13	NA	0.135	0.001369	0	0	0.14	0.18	NA	0.16	0.015268	40.32	0	0	0.16	2R_13160658_13160719_FBgn0020391_+	GAGGTGAGT	TTAATCTCTTTTCGCTACAGAAA	10.03	9.58	61
2R_15571609_15571677_FBgn0050466_+	CG30466	0.01	0.02	0.18	0.17	11.67	0.16	0.001947	0.03	0.03	0.16	0.15	5.17	0.125	0.001596	34.78	11.67	5.17	0.16	2R_15571609_15571677_FBgn0050466_+	ATGGTACCG	ATTTCTTTTGCCCTTTGCAGAAT	4.66	11.44	68
2R_23351643_23351704_FBgn0085239_+	CG34210	0.1	0.08	0.23	0.27	2.78	0.16	0.018977	0.1	0.08	0.21	0.26	2.61	0.145	0.032796	53.23	2.78	2.61	0.16	2R_23351643_23351704_FBgn0085239_+	CTTGTGAGC	CCCTTTTCCTTTCGCCCTAGTCT	3.38	9.96	61
2R_23357835_23357892_FBgn0034850_+	CG9875	0.01	0.02	0.17	0.18	11.67	0.16	0.001947	0.01	0.02	0.16	0.17	11	0.15	0.002215	50	11.67	11	0.16	2R_23357835_23357892_FBgn0034850_+	AAAGTGAGT	CCCATCCGAAATCCCTGAAGACT	8.4	2.41	57
3L_13044566_13044917_FBgn0036341_+	Syx13	0.04	0.07	0.21	0.22	3.91	0.16	0.009625	0.04	0.06	0.11	0.12	2.3	0.065	0.028334	50.28	3.91	2.3	0.16	3L_13044566_13044917_FBgn0036341_+	GAAGTAAGT	CGATACATATGCACTTACAGATA	9.82	6.2	351
3L_15473887_15474018_FBgn0036496_-	CG7804	0.05	0.07	0.2	0.22	3.5	0.15	0.008772	0.03	0.04	0.18	0.21	5.57	0.16	0.009625	33.33	5.57	3.5	0.16	3L_15473887_15474018_FBgn0036496_-	CGAGTGAGT	AAAGAATGTTTATCACACAGGAA	8.49	4.27	131
3L_17022487_17022559_FBgn0036687_-	CG6652	0.03	0.03	0.19	0.19	6.33	0.16	0	0.01	0	0.14	0.14	28	0.135	0.001369	52.05	28	6.33	0.16	3L_17022487_17022559_FBgn0036687_-	GGCGTGGGT	CCCCAAATCCCCTTTTCTAGAGC	-0.32	6.53	72
3L_21268899_21268966_FBgn0037064_-	CG9389	0.02	0.03	0.17	0.18	7	0.15	0.002215	0	0	0.16	0.16	NA	0.16	0	41.18	7	7	0.16	3L_21268899_21268966_FBgn0037064_-	TGCGTGAGT	CTACGGCGGATTCTTTGTAGGAT	7.55	6.42	67
3L_9712153_9712932_FBgn0040475_-	SH3PX1	0.04	0.04	0.09	0.1	2.38	0.055	0.008163	0.06	0.03	0.19	0.22	4.56	0.16	0.017128	39.23	4.56	2.38	0.16	3L_9712153_9712932_FBgn0040475_-	TCCGTAAGT	CTGGGTTTCCCTTTCGTTAGGTG	10.27	7.22	779
3R_18362330_18362401_FBgn0038607_+	hmw	0.03	0.03	0.18	0.2	6.33	0.16	0.003884	0.03	0.03	0.19	0.19	6.33	0.16	0	55.56	6.33	6.33	0.16	3R_18362330_18362401_FBgn0038607_+	AACGTAAGT	AACCTGCATCGCGCCCACAGCCA	10.74	6.51	71
3R_24060945_24061010_FBgn0040283_+	SMC1	0	0	0.12	0.17	NA	0.145	0.028463	0	0	0.13	0.19	NA	0.16	0.033405	30.3	0	0	0.16	3R_24060945_24061010_FBgn0040283_+	GGAGTGAGT	TGTCTATCCCAATTTTGCAGCCC	6.05	8.3	65
3R_24160863_24160925_FBgn0039157_-	Myo95E	0	0	0.12	0.16	NA	0.14	0.019804	0	0	0.17	0.15	NA	0.16	0.003884	36.51	0	0	0.16	3R_24160863_24160925_FBgn0039157_-	TATGTGAGT	CCGTATATATTCATTTCCAGACC	5.56	8.43	62
X_11092842_11092958_FBgn0027498_+	CG2061	0.01	0.01	0.17	0.17	17	0.16	0	0.01	0.03	0.18	0.18	9	0.16	0.003884	55.56	17	9	0.16	X_11092842_11092958_FBgn0027498_+	CAGGTGAGT	GCATGTTTGCACGATTTCAGCTG	10.67	5.1	116
X_2065892_2065944_FBgn0029596_-	CG14054	0.07	0.05	0.23	0.21	3.67	0.16	0.007722	0.03	0.04	0.18	0.18	5.14	0.145	0.001187	43.4	5.14	3.67	0.16	X_2065892_2065944_FBgn0029596_-	CTGGTTTGT	TAAAAGCAGTTCCTCCTCAGGCG	4.29	-0.26	52
2L_3521309_3521367_FBgn0031546_+	CG8851	0.01	0	0.14	0.17	31	0.15	0.010929	0.02	0.02	0.17	0.18	8.75	0.155	0.001039	28.81	31	8.75	0.155	2L_3521309_3521367_FBgn0031546_+	CAGGTATGA	AAACCTTCTTCCTTAATCAGGAT	9.46	8.25	58
2L_3708432_3708490_FBgn0015376_-	cutlet	0	0	0.15	0.16	NA	0.155	0.001039	0	0	0.13	0.16	NA	0.145	0.010533	38.98	0	0	0.155	2L_3708432_3708490_FBgn0015376_-	AAAGTGAGT	GCATATTTAAATGACCTCAGGGA	8.4	4.17	58
2L_5668882_5668942_FBgn0031728_+	Hsp60C	0.01	0.02	0.16	0.18	11.33	0.155	0.005163	0.03	0.03	0.16	0.17	5.5	0.135	0.001369	50.82	11.33	5.5	0.155	2L_5668882_5668942_FBgn0031728_+	TCAGTGAGT	GTTTTCCAATCCTCCCACAGGTC	7.68	11.78	60
2L_6777595_6777656_FBgn0031858_+	CG17378	0.01	0.01	0.16	0.17	16.5	0.155	0.001039	0.02	0.02	0.16	0.18	8.5	0.15	0.004415	25.81	16.5	8.5	0.155	2L_6777595_6777656_FBgn0031858_+	AGGGTAAAA	ATAGATTTCAATTCATCCAGATA	4.51	2.93	61
2L_9541059_9541117_FBgn0032124_+	CG17855	0	0	0.16	0.1	NA	0.13	0.049346	0	0	0.16	0.15	NA	0.155	0.001039	27.12	0	0	0.155	2L_9541059_9541117_FBgn0032124_+	CAGGTGTGT	ATACTCTAAAAATCTACTAGAGC	6.99	2.65	58
2R_10153984_10154041_FBgn0033494_-	KCNQ	0	0	0.14	0.17	NA	0.155	0.009236	0	0	0.15	0.14	NA	0.145	0.001187	24.14	0	0	0.155	2R_10153984_10154041_FBgn0033494_-	TAGGTAAAT	ATGATATTTGTGCATTCCAGATA	6.62	7.75	57
2R_12757232_12757297_FBgn0011227_-	ox	0.01	0.01	0.14	0.14	14	0.13	0	0.01	0	0.16	0.16	32	0.155	0.001039	40.91	32	14	0.155	2R_12757232_12757297_FBgn0011227_-	GGCGTAAGT	AAGATTTCCCCGCTTTGCAGAAA	9.39	7.4	65
2R_19686823_19686888_FBgn0034467_-	CG15128	0.01	0	0.14	0.18	32	0.155	0.017234	0	0	0.13	0.17	NA	0.15	0.017317	51.52	32	32	0.155	2R_19686823_19686888_FBgn0034467_-	ATGGTGAGC	GGTTTTTCCCCTGTCCGCAGAAA	8.27	10.8	65
2R_9238761_9238818_FBgn0033395_+	Cyp4p2	0	0	0.17	0.14	NA	0.155	0.009236	0	0	0.16	0.14	NA	0.15	0.004415	31.03	0	0	0.155	2R_9238761_9238818_FBgn0033395_+	TATGTGAGC	CTTCCTCTCTCGAAAACCAGATG	2.97	6.37	57
3L_11574031_11574092_FBgn0053490_-	CG33490	0.01	0.01	0.11	0.12	11.5	0.105	0.00226	0.02	0.02	0.16	0.19	8.75	0.155	0.009236	37.1	11.5	8.75	0.155	3L_11574031_11574092_FBgn0053490_-	CAGGTCGGT	GCACGTACCTTTTTGTTTAGATA	7.53	4.98	61
3L_1313909_1313974_FBgn0035207_+	Sherpa	0.77	0.71	0.9	0.89	1.21	0.155	0.036412	0.66	0.67	0.78	0.74	1.14	0.095	0.044006	36.36	1.21	1.14	0.155	3L_1313909_1313974_FBgn0035207_+	AATGTAGCT	AAGTAAATTATTATACCCAGAAC	0.89	0.64	65
3L_19897260_19897317_FBgn0014037_-	Su(Tpl)	0.09	0.08	0.25	0.23	2.82	0.155	0.005163	0.11	0.09	0.23	0.25	2.4	0.14	0.010051	32.76	2.82	2.4	0.155	3L_19897260_19897317_FBgn0014037_-	CAAGTAGGC	AATTGGTCACAATTTTGCAGCAA	5.3	4.45	57
3L_249651_249708_FBgn0052476_+	mthl14	0	0	0.13	0.18	NA	0.155	0.025042	0	0	0.12	0.11	NA	0.115	0.001885	32.76	0	0	0.155	3L_249651_249708_FBgn0052476_+	AGAGTGAGT	ATTTTAATTTTTGTCGTTAGCGC	7.36	5.46	57
3L_2659749_2659806_FBgn0053233_+	CG33233	0.02	0	0.16	0.17	16.5	0.155	0.005163	0.02	0.02	0.15	0.15	7.5	0.13	0	39.66	16.5	7.5	0.155	3L_2659749_2659806_FBgn0053233_+	TAGGTAAAA	TAACATTTGGTCTTCACCAGGTT	6.02	8.02	57
3L_7467859_7467919_FBgn0035786_+	Tsp66A	0.01	0	0.15	0.16	31	0.15	0.002215	0.01	0	0.16	0.16	32	0.155	0.001039	26.23	32	31	0.155	3L_7467859_7467919_FBgn0035786_+	CGCGTAAGA	CCCACTTCGTTTATTAAAAGTGC	6.41	3.71	60
3L_7467859_7467919_FBgn0261536_+	CG42660	0.01	0	0.15	0.16	31	0.15	0.002215	0.01	0	0.16	0.16	32	0.155	0.001039	26.23	32	31	0.155	3L_7467859_7467919_FBgn0261536_+	CGCGTAAGA	CCCACTTCGTTTATTAAAAGTGC	6.41	3.71	60
3L_7467859_7467919_FBgn0261537_+	CG42661	0.01	0	0.15	0.16	31	0.15	0.002215	0.01	0	0.16	0.16	32	0.155	0.001039	26.23	32	31	0.155	3L_7467859_7467919_FBgn0261537_+	CGCGTAAGA	CCCACTTCGTTTATTAAAAGTGC	6.41	3.71	60
3L_8112439_8112493_FBgn0027549_+	CG7927	0	0	0.14	0.17	NA	0.155	0.009236	0.07	0.08	0.19	0.25	2.93	0.145	0.04129	38.18	2.93	2.93	0.155	3L_8112439_8112493_FBgn0027549_+	TCGGTATGT	CTAAAAACCAGTACTTGCAGAAA	9.22	-2.56	54
3R_12041963_12042016_FBgn0037986_+	CG14736	0.87	0.89	1.02	0.99	1.14	0.125	0.020173	0.85	0.88	1.01	1.03	1.18	0.155	0.013259	33.33	1.18	1.14	0.155	3R_12041963_12042016_FBgn0037986_+	CAGGTGACA	CTCAAAGAGTTTTATAAAAGGTA	5.49	-3.76	53
3R_24059231_24059288_FBgn0040283_+	SMC1	0.03	0	0.17	0.17	11.33	0.155	0.009236	0.06	0	0.18	0.16	5.67	0.14	0.047421	31.03	11.33	5.67	0.155	3R_24059231_24059288_FBgn0040283_+	TACGTATGA	ACATCTTTTTATTCTAATAGAAT	2.15	7.43	57
3R_27112691_27112830_FBgn0027574_+	CG5815	0.05	0.08	0.2	0.24	3.38	0.155	0.025042	0.04	0.04	0.14	0.13	3.38	0.095	0.002759	43.57	3.38	3.38	0.155	3R_27112691_27112830_FBgn0027574_+	GTGGTGGGT	TTTTTCTCCTCTATCGCCAGGGG	4.29	9.63	139
3R_31769649_31769707_FBgn0039874_-	--	0.06	0.06	0.19	0.24	3.58	0.155	0.025042	0.04	0.05	0.2	0.2	4.44	0.155	0.001039	35.59	4.44	3.58	0.155	3R_31769649_31769707_FBgn0039874_-	AGAGTCTGT	ATTAAAATTATCCTCTGCAGCTA	-5.4	6.21	58
X_12974461_12974518_FBgn0262682_-	CR43152	0	0	0.15	0.16	NA	0.155	0.001039	0	0	0.15	0.15	NA	0.15	0	37.93	0	0	0.155	X_12974461_12974518_FBgn0262682_-	ATGGTAAGA	CTAACTGCATATCCCTGTAGCCA	9.48	5.5	57
X_19670414_19670483_FBgn0004057_+	Zw	0	0	0.17	0.14	NA	0.155	0.009236	0	0	0.1	0.08	NA	0.09	0.012122	44.29	0	0	0.155	X_19670414_19670483_FBgn0004057_+	AGAGTAATA	CCTTTCATATGTGCCCACAGATC	-1.92	11.74	69
X_19904446_19904508_FBgn0052529_+	Hers	0	0	0.12	0.15	NA	0.135	0.012122	0	0	0.18	0.13	NA	0.155	0.025042	34.92	0	0	0.155	X_19904446_19904508_FBgn0052529_+	ACGGTGGGT	AAACTCGATTAATTATCCAGGCG	8.27	2.43	62
2L_11652570_11652620_FBgn0032371_+	CG4983	0	0	0.15	0.15	NA	0.15	0	0	0	0.15	0.15	NA	0.15	0	41.18	0	0	0.15	2L_11652570_11652620_FBgn0032371_+	CAGGTAAGT	GGTTAAGGTCAAACACGTAGGTC	10.86	-1.51	50
2L_11652570_11652629_FBgn0032371_+	CG4983	0	0	0.15	0.15	NA	0.15	0	0.04	0.06	0.2	0.19	3.9	0.145	0.005893	45	3.9	3.9	0.15	2L_11652570_11652629_FBgn0032371_+	CAGGTAAGT	CAAACACGTAGGTCCCACAGGAA	10.86	0.35	59
2L_13285826_13285951_FBgn0264892_+	CR44083	0	0	0.1	0.1	NA	0.1	0	0	0	0.18	0.12	NA	0.15	0.03775	39.68	0	0	0.15	2L_13285826_13285951_FBgn0264892_+	AAGGTAAAA	TCTTTTTTTTTTTTTGCCAGGCA	8.38	9.1	125
2L_16044858_16044920_FBgn0000182_+	BicC	0	0	0.16	0.14	NA	0.15	0.004415	0.02	0.03	0.18	0.15	6.6	0.14	0.012516	22.22	6.6	6.6	0.15	2L_16044858_16044920_FBgn0000182_+	AGGGTAGGA	ATAAATCCCATAATTTAAAGATC	6.45	3.25	62
2L_16044858_16044920_FBgn0266459_+	CG45084	0	0	0.16	0.14	NA	0.15	0.004415	0.02	0.03	0.18	0.15	6.6	0.14	0.012516	22.22	6.6	6.6	0.15	2L_16044858_16044920_FBgn0266459_+	AGGGTAGGA	ATAAATCCCATAATTTAAAGATC	6.45	3.25	62
2L_22105052_22105115_FBgn0040519_-	CG15219	0.01	0.01	0.16	0.16	16	0.15	0	1.08	1.09	1.16	1.16	1.07	0.075	0.004415	34.38	16	1.07	0.15	2L_22105052_22105115_FBgn0040519_-	TTAGTATGT	TTAGCTCTCCAATGGAACAGCAG	2.85	0.96	63
2L_9912286_9912343_FBgn0032157_-	Etl1	0	0	0.14	0.11	NA	0.125	0.014096	0	0.02	0.17	0.15	16	0.15	0.008772	44.83	16	16	0.15	2L_9912286_9912343_FBgn0032157_-	CTGGTACTT	AGCTAACTGCCTGATTTCAGAGC	4.74	4.65	57
2R_11290829_11290891_FBgn0033610_-	CG18335	0.01	0.01	0.15	0.17	16	0.15	0.004415	0	0	0.14	0.16	NA	0.15	0.004415	38.1	16	16	0.15	2R_11290829_11290891_FBgn0033610_-	AGGGTAAGC	GGTGTTGATGTAACTTTCAGTTA	9.04	4.54	62
2R_13206124_13206179_FBgn0005654_-	Orc3	0.01	0	0.11	0.14	25	0.12	0.016922	0.01	0	0.13	0.18	31	0.15	0.027694	39.29	31	25	0.15	2R_13206124_13206179_FBgn0005654_-	ATTGTAAGT	TATGAACTTATTCTTTCCAGTTT	8.54	6.31	55
2R_13206124_13206179_FBgn0085344_-	CG34315	0.01	0	0.11	0.14	25	0.12	0.016922	0.01	0	0.13	0.18	31	0.15	0.027694	39.29	31	25	0.15	2R_13206124_13206179_FBgn0085344_-	ATTGTAAGT	TATGAACTTATTCTTTCCAGTTT	8.54	6.31	55
2R_14946604_14946703_FBgn0261854_-	aPKC	0.01	0.04	0.1	0.11	4.2	0.08	0.036913	0	0.02	0.15	0.17	16	0.15	0.008772	40	16	4.2	0.15	2R_14946604_14946703_FBgn0261854_-	TGAGTAAGT	TGATTTTCTTTAACTCTCAGTCA	8.82	7.11	99
2R_15200060_15200118_FBgn0033995_-	GPHR	0	0	0.12	0.15	NA	0.135	0.012122	0	0	0.14	0.16	NA	0.15	0.004415	28.81	0	0	0.15	2R_15200060_15200118_FBgn0033995_-	AAGGTTGTT	TTTTCCCTTAATTTCTTCAGACA	2.39	7.4	58
2R_16871441_16871510_FBgn0034162_+	CG6426	0	0	0.18	0.12	NA	0.15	0.03775	0	0	0.11	0.07	NA	0.09	0.046002	41.43	0	0	0.15	2R_16871441_16871510_FBgn0034162_+	ATGGTGAGT	GCACATTAATCTCGCTGCAGCGT	10.13	4.87	69
2R_18681986_18682046_FBgn0265626_-	CG44434	0.01	0.01	0.16	0.16	16	0.15	0	0	0	0.15	0.14	NA	0.145	0.001187	36.07	16	16	0.15	2R_18681986_18682046_FBgn0265626_-	AGGGTTAGT	GCAAAGATCTTTCTTTGAAGGTG	5.02	4.8	60
2R_18681986_18682046_FBgn0265627_-	CG44435	0.01	0.01	0.16	0.16	16	0.15	0	0	0	0.15	0.14	NA	0.145	0.001187	36.07	16	16	0.15	2R_18681986_18682046_FBgn0265627_-	AGGGTTAGT	GCAAAGATCTTTCTTTGAAGGTG	5.02	4.8	60
2R_19059644_19059734_FBgn0034416_+	CG15109	0.03	0.03	0.17	0.16	5.5	0.135	0.001369	0.03	0.02	0.18	0.17	7	0.15	0.002215	30.77	7	5.5	0.15	2R_19059644_19059734_FBgn0034416_+	GGTGTAAGT	CATCCATTGTTTTGCTTAAGGTG	8.07	7.46	90
2R_19059654_19059734_FBgn0034416_+	CG15109	0.02	0.02	0.18	0.16	8.5	0.15	0.004415	0.03	0.02	0.18	0.17	7	0.15	0.002215	30.86	8.5	7	0.15	2R_19059654_19059734_FBgn0034416_+	TACGTTAGT	CATCCATTGTTTTGCTTAAGGTG	-1.77	7.46	80
2R_23324924_23324976_FBgn0034844_+	CG9861	0.01	0	0.17	0.14	31	0.15	0.010929	0.04	0.03	0.19	0.15	4.86	0.135	0.022534	24.53	31	4.86	0.15	2R_23324924_23324976_FBgn0034844_+	CCGGTAAGT	TACCTAATATCCAATTAAAGAAA	10.91	2.11	52
3L_11027619_11027669_FBgn0052081_+	CG32081	0.01	0	0.13	0.18	31	0.15	0.027694	0.03	0.03	0.13	0.15	4.67	0.11	0.008163	27.45	31	4.67	0.15	3L_11027619_11027669_FBgn0052081_+	AGGGTAAGA	AAAACAATTTTCTTCCACAGAGG	9.21	8.7	50
3L_21533179_21533566_FBgn0029152_-	Mkrn1	0.01	0.01	0.07	0.06	6.5	0.055	0.008163	0.4	0.36	0.54	0.52	1.39	0.15	0.021508	46.39	6.5	1.39	0.15	3L_21533179_21533566_FBgn0029152_-	CAGGTAATG	CTTTGCTTTCAGGTCATCAGGTC	9.43	1.64	387
3L_21634197_21634261_FBgn0037109_-	MED1	0.03	0.01	0.15	0.16	7.75	0.135	0.006789	0.02	0.02	0.17	0.17	8.5	0.15	0	43.08	8.5	7.75	0.15	3L_21634197_21634261_FBgn0037109_-	CTGGTAAGT	ACTGACACAAATCTGCACAGGCT	10.65	2.97	64
3L_23126119_23126199_FBgn0053217_+	CG33217	0.02	0	0.14	0.18	16	0.15	0.021508	0.06	0.04	0.15	0.2	3.5	0.125	0.043402	25.93	16	3.5	0.15	3L_23126119_23126199_FBgn0053217_+	TTGGTATGT	TTTCATTTATTGAACAATAGATA	7.12	3.91	80
3L_3620810_3620871_FBgn0040694_-	CG14974	0	0	0.14	0.16	NA	0.15	0.004415	0.07	0.03	0.18	0.2	3.8	0.14	0.024574	25.81	3.8	3.8	0.15	3L_3620810_3620871_FBgn0040694_-	AGTGTAAGT	GGTTAATGTGTTTTAAGCAGCCG	8.46	2.42	61
3L_3620813_3620871_FBgn0040694_-	CG14974	0	0	0.14	0.16	NA	0.15	0.004415	0.02	0.01	0.13	0.14	9	0.12	0.003454	23.73	9	9	0.15	3L_3620813_3620871_FBgn0040694_-	AGTGTAAGT	GTAGGTTAATGTGTTTTAAGCAG	8.46	-0.27	58
3L_7584482_7584531_FBgn0035799_+	CG14838	0	0	0.08	0.11	NA	0.095	0.024036	0.1	0.05	0.21	0.24	3	0.15	0.035763	26	3	3	0.15	3L_7584482_7584531_FBgn0035799_+	AAGGTAGGT	TATACAAAATATATCTAAAGACC	10.29	0.71	49
3R_12706963_12707020_FBgn0002905_-	mus308	0	0	0.15	0.15	NA	0.15	0	0.02	0	0.17	0.14	15.5	0.145	0.015108	32.76	15.5	15.5	0.15	3R_12706963_12707020_FBgn0002905_-	ACGGTAACT	TAACCAAAATCCCTTTCTAGATA	7.53	6.93	57
3R_14903892_14903950_FBgn0028662_-	VhaPPA1-1	0.02	0.01	0.19	0.14	11	0.15	0.027694	0.01	0.01	0.17	0.12	14.5	0.135	0.032625	55.93	14.5	11	0.15	3R_14903892_14903950_FBgn0028662_-	TCGGTGAGT	AACGCTCCCCCGTTCCGCAGACA	11.11	10.24	58
3R_20820444_20820649_FBgn0038829_-	CG17271	0.01	0.04	0.09	0.1	3.8	0.07	0.047421	0.01	0.05	0.17	0.19	6	0.15	0.021508	42.23	6	3.8	0.15	3R_20820444_20820649_FBgn0038829_-	ACGGTAAGA	AACAAATCATTGCCATGCAGAGC	10.65	3.82	205
3R_30696425_30696504_FBgn0000274_-	Pka-C2	0.01	0.02	0.16	0.16	10.67	0.145	0.001187	0.04	0.04	0.17	0.21	4.75	0.15	0.017317	48.75	10.67	4.75	0.15	3R_30696425_30696504_FBgn0000274_-	CAGGTGAGT	TTCCCCCCCCCATAAAAAAGAGT	10.67	0.84	79
3R_31593310_31593366_FBgn0039856_+	CG1774	0.01	0	0.15	0.15	30	0.145	0.001187	0.05	0.05	0.18	0.22	4	0.15	0.017317	45.61	30	4	0.15	3R_31593310_31593366_FBgn0039856_+	AGGGTAAGT	TGACACCTCTTTACCCCTAGTGG	10.45	7.92	56
3R_5558302_5558366_FBgn0037339_-	Pi4KIIalpha	0.01	0	0.13	0.14	27	0.13	0.002946	0	0	0.14	0.16	NA	0.15	0.004415	43.08	27	27	0.15	3R_5558302_5558366_FBgn0037339_-	GTGGTAGGT	GCCACTTACTTCACTTTTAGCTA	7.23	7.31	64
3R_7084319_7084374_FBgn0037470_-	Tailor	0.02	0.01	0.14	0.15	9.67	0.13	0.002946	0.02	0.01	0.17	0.16	11	0.15	0.002215	42.86	11	9.67	0.15	3R_7084319_7084374_FBgn0037470_-	AATGTGAGC	CATTGCACTTTCTTCAACAGTTC	5.2	8.68	55
3R_7085358_7085413_FBgn0037470_-	Tailor	0	0.01	0.17	0.14	31	0.15	0.010929	0	0	0.12	0.13	NA	0.125	0.001596	42.86	31	31	0.15	3R_7085358_7085413_FBgn0037470_-	TACGTGAGT	AAAGCCCGCTGATCGTGCAGATG	7.77	4.52	55
X_16741430_16741523_FBgn0052568_+	CG32568	0.01	0	0.12	0.18	30	0.145	0.04129	0.01	0	0.13	0.18	31	0.15	0.027694	20.21	31	30	0.15	X_16741430_16741523_FBgn0052568_+	TGAGTACGT	TTTTTTTTTTTTTTGAACAGTAT	4.8	8.78	93
X_18098512_18098578_FBgn0030894_-	Mvb12	0.01	0.01	0.18	0.14	16	0.15	0.017317	0.02	0	0.17	0.13	15	0.14	0.024574	44.78	16	15	0.15	X_18098512_18098578_FBgn0030894_-	GATGTGAGT	TTCGAAATATGTATGCATAGATA	7.77	1.6	66
X_18786543_18786598_FBgn0030959_-	CG6961	0	0	0.13	0.12	NA	0.125	0.001596	0.02	0.02	0.18	0.16	8.5	0.15	0.004415	42.86	8.5	8.5	0.15	X_18786543_18786598_FBgn0030959_-	CAGGTGAGT	TTCAACGTTCTCGGCCGTAGCTC	10.67	7.27	55
2L_12696379_12697465_FBgn0032447_+	PICK1	0.21	0.27	0.39	0.38	1.6	0.145	0.04129	0.05	0.07	0.13	0.14	2.25	0.075	0.021508	46	2.25	1.6	0.145	2L_12696379_12697465_FBgn0032447_+	CAGGTAAGT	TCACATCTTGTAAACTCTAGATC	10.86	7.19	1086
2L_18011012_18011077_FBgn0032660_-	elfless	0.02	0.02	0.18	0.15	8.25	0.145	0.010533	0.01	0.01	0.13	0.11	12	0.11	0.008163	37.88	12	8.25	0.145	2L_18011012_18011077_FBgn0032660_-	TCTGTAAGT	ATTACAACATCATTTAATAGGAG	7.96	4.33	65
2L_2416380_2416435_FBgn0051948_-	CG31948	0.99	0.96	1.11	1.09	1.13	0.125	0.020173	0.92	0.93	1.06	1.08	1.16	0.145	0.005893	35.71	1.16	1.13	0.145	2L_2416380_2416435_FBgn0051948_-	AAGGTAGCG	AATAATGAAGAAGTCTTTAGTCG	6.91	-12.21	55
2L_6005154_6005212_FBgn0001089_-	Gal	0.04	0.01	0.15	0.13	5.6	0.115	0.023704	0.05	0	0.16	0.18	6.8	0.145	0.032796	40.68	6.8	5.6	0.145	2L_6005154_6005212_FBgn0001089_-	GCAGTGAGT	ACACCAAACCCGCATTGCAGTCA	7.39	4.17	58
2L_7713481_7713538_FBgn0267326_+	Ntl	0.01	0.01	0.15	0.16	15.5	0.145	0.001187	0.01	0.01	0.14	0.15	14.5	0.135	0.001369	37.93	15.5	14.5	0.145	2L_7713481_7713538_FBgn0267326_+	ATTGTAAGA	GCCTAATGAGAAACATTCAGTTT	4.37	-5.88	57
2R_10038513_10038580_FBgn0033476_-	oys	0	0	0.12	0.17	NA	0.145	0.028463	0.01	0.01	0.12	0.17	14.5	0.135	0.032625	26.47	14.5	14.5	0.145	2R_10038513_10038580_FBgn0033476_-	GAGGTGGGA	TTTCTTTGTTGTTATCCTAGTTT	4.3	5.57	67
2R_10320373_10320445_FBgn0250822_-	CG34222	0.01	0	0.16	0.14	30	0.145	0.005893	0.01	0	0.14	0.13	27	0.13	0.002946	28.77	30	27	0.145	2R_10320373_10320445_FBgn0250822_-	ACGGTAAGT	AATTTTGTTACTCTGTCAAGGGA	11.81	3.12	72
2R_13212012_13212066_FBgn0050058_-	CG30058	0.08	0.04	0.18	0.23	3.42	0.145	0.045453	0.06	0.03	0.16	0.17	3.67	0.12	0.016922	52.73	3.67	3.42	0.145	2R_13212012_13212066_FBgn0050058_-	CATGTAAGC	ACGTTTGTGTTCTCCCACAGGGA	5.61	12.35	54
2R_13212012_13212066_FBgn0085264_-	CG34235	0.08	0.04	0.18	0.23	3.42	0.145	0.045453	0.06	0.03	0.16	0.17	3.67	0.12	0.016922	52.73	3.67	3.42	0.145	2R_13212012_13212066_FBgn0085264_-	CATGTAAGC	ACGTTTGTGTTCTCCCACAGGGA	5.61	12.35	54
2R_13212012_13212066_FBgn0085341_-	CG34312	0.08	0.04	0.18	0.23	3.42	0.145	0.045453	0.06	0.03	0.16	0.17	3.67	0.12	0.016922	52.73	3.67	3.42	0.145	2R_13212012_13212066_FBgn0085341_-	CATGTAAGC	ACGTTTGTGTTCTCCCACAGGGA	5.61	12.35	54
2R_13440329_13440391_FBgn0013765_-	cnn	0.02	0.01	0.16	0.16	10.67	0.145	0.001187	0.02	0.01	0.14	0.13	9	0.12	0.003454	38.1	10.67	9	0.145	2R_13440329_13440391_FBgn0013765_-	AGGGTATGT	AAAGTGTTATTTTTTCACAGAAT	8.34	6.81	62
2R_23139396_23139457_FBgn0034826_-	CG13544	0.04	0.04	0.16	0.2	4.5	0.14	0.019804	0.01	0.01	0.14	0.17	15.5	0.145	0.010533	22.58	15.5	4.5	0.145	2R_23139396_23139457_FBgn0034826_-	ACAGTAAGC	TATATAAATTCATTTCACAGGAA	5.94	8.08	61
3L_1524140_1524194_FBgn0035227_-	Iml1	0.03	0.03	0.12	0.11	3.83	0.085	0.003442	0.04	0.07	0.18	0.22	3.64	0.145	0.028463	25.45	3.83	3.64	0.145	3L_1524140_1524194_FBgn0035227_-	ATGGTACTT	AACTTGAACTATGATTGCAGAGT	5.19	2.98	54
3L_16601670_16601730_FBgn0036646_-	CR18217	0	0	0.13	0.14	NA	0.135	0.001369	0.02	0.03	0.17	0.17	6.8	0.145	0.001187	24.59	6.8	6.8	0.145	3L_16601670_16601730_FBgn0036646_-	CAAGTAAGC	CTTTCAACTTTTATTTACAGTTC	7.47	8.65	60
3L_19537106_19537167_FBgn0036881_+	Cpr76Bd	0	0	0.11	0.11	NA	0.11	0	0	0	0.12	0.17	NA	0.145	0.028463	40.32	0	0	0.145	3L_19537106_19537167_FBgn0036881_+	TTCGTAAGT	ATTATATCCCCCATGCCCAGGAT	9.77	5.2	61
3L_20965756_20965809_FBgn0037040_-	CG12983	0.03	0.03	0.16	0.19	5.83	0.145	0.010533	0.01	0.01	0.14	0.15	14.5	0.135	0.001369	29.63	14.5	5.83	0.145	3L_20965756_20965809_FBgn0037040_-	GAAGTTAGT	ACATTAATTAATATTTTCAGGCT	2.87	5.85	53
3L_21194957_21195033_FBgn0041100_-	park	0.03	0.04	0.16	0.12	4	0.105	0.036454	0	0	0.17	0.12	NA	0.145	0.028463	50.65	4	4	0.145	3L_21194957_21195033_FBgn0041100_-	ATGGTGAGT	TCTTCTTCTCTTCCTACCAGGCG	10.13	11.01	76
3L_7586038_7586097_FBgn0035799_+	CG14838	0.03	0.03	0.19	0.16	5.83	0.145	0.010533	0.04	0.04	0.19	0.17	4.5	0.14	0.005063	31.67	5.83	4.5	0.145	3L_7586038_7586097_FBgn0035799_+	TGGGTATAT	TTTACAATATCTCTGAACAGCCC	2.05	7.21	59
3L_9416194_9416260_FBgn0035988_-	CG3982	0.01	0	0.13	0.15	28	0.135	0.006789	0.01	0	0.14	0.16	30	0.145	0.005893	38.81	30	28	0.145	3L_9416194_9416260_FBgn0035988_-	TATGTAAAT	TACACACACCTGACCCACAGCCC	-0.49	5.46	66
3R_16146360_16146422_FBgn0038400_-	CG5903	0.01	0	0.15	0.15	30	0.145	0.001187	0.01	0	0.14	0.13	27	0.13	0.002946	49.21	30	27	0.145	3R_16146360_16146422_FBgn0038400_-	AGAGTGAGT	CTCCTTTAATGCTACCGCAGACC	7.36	6.13	62
3R_24754056_24754127_FBgn0000140_+	asp	0.01	0	0.13	0.12	25	0.12	0.003454	0.02	0.05	0.21	0.15	5.14	0.145	0.049563	38.89	25	5.14	0.145	3R_24754056_24754127_FBgn0000140_+	GAGGTTAGT	TAGATTACCGGTACTTACAGATC	7.15	3.47	71
3R_25031495_25031550_FBgn0039260_-	Smg6	0.06	0.04	0.16	0.2	3.6	0.13	0.028334	0.05	0.05	0.18	0.21	3.9	0.145	0.010533	30.36	3.9	3.6	0.145	3R_25031495_25031550_FBgn0039260_-	AAAGTATGA	TGCTTTCTATTATTGTATAGCGT	3.87	7.36	55
3R_26415190_26415252_FBgn0039425_+	CG5432	0.01	0	0.14	0.16	30	0.145	0.005893	0.03	0.02	0.16	0.17	6.6	0.14	0.002541	20.63	30	6.6	0.145	3R_26415190_26415252_FBgn0039425_+	AGGGTCAGT	TCTTTTAAAAAATATTTTAGGCC	5.85	7.26	62
3R_28650331_28650388_FBgn0051050_-	CG31050	0.01	0.01	0.14	0.17	15.5	0.145	0.010533	0	0	0.12	0.16	NA	0.14	0.019804	41.38	15.5	15.5	0.145	3R_28650331_28650388_FBgn0051050_-	TTCGTGAGT	AACTTATGTACCGCATGCAGGCA	7.9	4.77	57
3R_9008631_9008713_FBgn0037654_+	CG11983	0.01	0.01	0.13	0.09	11	0.1	0.03775	0.03	0.02	0.19	0.15	6.8	0.145	0.019621	32.53	11	6.8	0.145	3R_9008631_9008713_FBgn0037654_+	GTGGTATGT	TTTTTGTTTATTTTGCGTAGGTG	7.64	8.16	82
X_15335269_15335349_FBgn0026428_+	HDAC6	0.01	0	0.14	0.16	30	0.145	0.005893	0.02	0.03	0.15	0.19	6.8	0.145	0.019621	45.68	30	6.8	0.145	X_15335269_15335349_FBgn0026428_+	AATGTGAGT	TAATCGTCGCCGACGAAAAGGCT	7.8	-3.49	80
X_2790158_2790244_FBgn0040384_-	CG32795	0.03	0.03	0.17	0.18	5.83	0.145	0.001187	0.02	0.03	0.14	0.13	5.4	0.11	0.004107	21.84	5.83	5.4	0.145	X_2790158_2790244_FBgn0040384_-	TTTGTATGT	TAATATTATGACTTTTTAAGGTA	2.51	6.88	86
X_6847398_6847456_FBgn0029912_+	CG4557	0.03	0.01	0.14	0.19	8.25	0.145	0.032796	0.03	0.03	0.12	0.15	4.5	0.105	0.019804	37.29	8.25	4.5	0.145	X_6847398_6847456_FBgn0029912_+	ACGGTAGGA	TACTATTCGTCCAATGGTAGATG	8.6	4.57	58
X_7511659_7511718_FBgn0052719_-	CG32719	0	0	0.14	0.15	NA	0.145	0.001187	0.03	0.01	0.13	0.15	7	0.12	0.013606	25	7	7	0.145	X_7511659_7511718_FBgn0052719_-	AAGGTTATT	CTAATATTTTTTTTATTTAGATC	4.15	8.86	59
2L_10336884_10336944_FBgn0032223_+	GATAd	0	0	0.12	0.16	NA	0.14	0.019804	0.02	0.02	0.1	0.14	6	0.1	0.03775	31.15	6	6	0.14	2L_10336884_10336944_FBgn0032223_+	CCGGTACGT	AAAACATTTCAATTTGATAGCTA	10.49	3.19	60
2L_12130818_12130885_FBgn0032415_-	rho-6	0	0	0.16	0.12	NA	0.14	0.019804	0	0	0.12	0.13	NA	0.125	0.001596	38.24	0	0	0.14	2L_12130818_12130885_FBgn0032415_-	CTGGTCAGT	ATCCCTACTTTGTCGAACAGAAC	6.6	5.43	67
2R_14233130_14233187_FBgn0261276_-	Opa1	0	0	0.16	0.12	NA	0.14	0.019804	0	0	0.11	0.12	NA	0.115	0.001885	37.93	0	0	0.14	2R_14233130_14233187_FBgn0261276_-	CCAGTAAGT	TCACCTCTCTCCATACTTAGTCG	9.09	6.86	57
2R_17472435_17472492_FBgn0022987_+	qkr54B	0	0	0.14	0.13	NA	0.135	0.001369	0	0	0.16	0.12	NA	0.14	0.019804	34.48	0	0	0.14	2R_17472435_17472492_FBgn0022987_+	AAGGTGAGT	TAATCCCAACTATCTTTTAGGTA	10.47	6.94	57
2R_22699735_22699801_FBgn0005631_-	robo1	0.02	0.04	0.13	0.13	4.33	0.1	0.009852	0.02	0.02	0.19	0.13	8	0.14	0.04298	53.73	8	4.33	0.14	2R_22699735_22699801_FBgn0005631_-	GAGGTAAAC	ATCCTTCCTACTCCTTTCAGGCC	7.2	9.7	66
2R_24532379_24532439_FBgn0035020_+	CG13585	0.05	0.02	0.17	0.18	5	0.14	0.012516	0.07	0.06	0.15	0.14	2.23	0.08	0.007722	42.62	5	2.23	0.14	2R_24532379_24532439_FBgn0035020_+	AATGTAGTA	ACCTACTCCGATCTCCGCAGCGC	-7.07	8.87	60
2R_24871646_24871708_FBgn0035073_-	CG16896	0	0.04	0.18	0.14	8	0.14	0.038476	0.01	0.06	0.19	0.16	5	0.14	0.040736	33.33	8	5	0.14	2R_24871646_24871708_FBgn0035073_-	GATGTATGT	GTCTACTTTCTTCCGAACAGATG	6.31	8.89	62
3L_10216300_10216359_FBgn0036075_+	CG8065	0.01	0.01	0.13	0.17	15	0.14	0.019804	0.02	0.03	0.14	0.16	6	0.125	0.007905	31.67	15	6	0.14	3L_10216300_10216359_FBgn0036075_+	AAGGTATTG	TTCTATCATCCAACCTCAAGGCC	7.76	4.16	59
3L_13386539_13386600_FBgn0036353_-	CG10171	0.08	0.06	0.19	0.19	2.71	0.12	0.006873	0.08	0.05	0.19	0.22	3.15	0.14	0.022198	32.26	3.15	2.71	0.14	3L_13386539_13386600_FBgn0036353_-	CAGGTATAT	CGGTGAAATACCCTCCATAGATA	7.88	4.66	61
3L_17761457_17761594_FBgn0052181_+	CG32181	0.04	0.05	0.19	0.15	3.78	0.125	0.026138	0.04	0.03	0.18	0.17	5	0.14	0.002541	29.71	5	3.78	0.14	3L_17761457_17761594_FBgn0052181_+	AACGTAAGT	TTATTAATGCACAATATAAGCAG	10.74	-2.35	137
3L_19620693_19620754_FBgn0036895_+	ms(3)76Cc	0.07	0.03	0.19	0.19	3.8	0.14	0.019804	0.07	0.03	0.17	0.18	3.5	0.125	0.026138	43.55	3.8	3.5	0.14	3L_19620693_19620754_FBgn0036895_+	TACGTGGAG	ATCCTCCTGATCGTCCTTAGGTA	-16.84	9.4	61
3L_20960651_20960726_FBgn0037038_-	CG11037	0.02	0.01	0.12	0.11	7.67	0.1	0.004963	0.02	0.04	0.2	0.14	5.67	0.14	0.047421	36.84	7.67	5.67	0.14	3L_20960651_20960726_FBgn0037038_-	CGGGTAAGT	TATTTTATTTGCTTTAACAGCTA	10.75	8.2	75
3L_3159349_3159408_FBgn0266582_-	ND-30	0.04	0.04	0.19	0.17	4.5	0.14	0.005063	0.02	0.02	0.16	0.14	7.5	0.13	0.005865	41.67	7.5	4.5	0.14	3L_3159349_3159408_FBgn0266582_-	ATGGTTGGT	TCTAACCCTTCAACAATCAGTGG	5.29	4.35	59
3L_7475908_7475965_FBgn0262984_+	CG43292	0	0	0.14	0.14	NA	0.14	0	0.01	0.01	0.13	0.15	14	0.13	0.005865	31.03	14	14	0.14	3L_7475908_7475965_FBgn0262984_+	TTGGTAGCT	ATATTCTAAAATTATTTCAGCTG	-0.7	6.33	57
3R_11742162_11742236_FBgn0037943_+	CG14722	0.01	0	0.11	0.14	25	0.12	0.016922	0.01	0.02	0.15	0.16	10.33	0.14	0.002541	44	25	10.33	0.14	3R_11742162_11742236_FBgn0037943_+	CACGTGAGT	TCCGAACATACGTTTCGCAGACA	9.3	5.02	74
3R_14604605_14604692_FBgn0020299_+	stumps	0	0	0.07	0.07	NA	0.07	0	0	0	0.14	0.14	NA	0.14	0	22.73	0	0	0.14	3R_14604605_14604692_FBgn0020299_+	CAAGTGAGT	CATCCATTTATCCTTTCCAGTTT	9.1	8.86	87
3R_15238575_15238631_FBgn0045035_-	tefu	0	0	0.14	0.14	NA	0.14	0	0	0	0.13	0.14	NA	0.135	0.001369	36.84	0	0	0.14	3R_15238575_15238631_FBgn0045035_-	ACGGTAAGC	AATGGCTATTTCTTATTTAGTAC	9.89	6.13	56
3R_27929792_27929980_FBgn0027579_+	mino	0.8	0.82	0.93	0.9	1.13	0.105	0.028236	0.05	0.05	0.18	0.2	3.8	0.14	0.005063	44.97	3.8	1.13	0.14	3R_27929792_27929980_FBgn0027579_+	TGGGTAAAT	TTCCGATCGTTTCATTGCAGGAG	4.69	7.62	188
3R_5785382_5785429_FBgn0037375_+	kat-60L1	0	0	0.12	0.16	NA	0.14	0.019804	0.01	0.01	0.13	0.17	15	0.14	0.019804	47.92	15	15	0.14	3R_5785382_5785429_FBgn0037375_+	AAGGTTGGT	ATATAATCATTAAAATGCAGTTT	8.46	1.62	47
3R_5785382_5785441_FBgn0037375_+	kat-60L1	0	0	0.12	0.16	NA	0.14	0.019804	0.28	0.31	0.37	0.39	1.29	0.085	0.042159	51.67	1.29	1.29	0.14	3R_5785382_5785441_FBgn0037375_+	AAGGTTGGT	AAATGCAGTTTCCGCCGCAGAAG	8.46	3.45	59
3R_9760479_9760531_FBgn0037744_+	CG8417	0.01	0.01	0.14	0.14	14	0.13	0	0.01	0.03	0.15	0.17	8	0.14	0.010051	33.96	14	8	0.14	3R_9760479_9760531_FBgn0037744_+	ACGGTGAGC	TAAACATTCCTCTAAAATAGAAC	9.44	5.52	52
X_15896305_15896365_FBgn0003392_+	shi	0	0.01	0.1	0.12	22	0.105	0.011149	0	0.01	0.14	0.15	29	0.14	0.002541	39.34	29	22	0.14	X_15896305_15896365_FBgn0003392_+	CAAGTGCGT	AAATCTTGCACTCATTATAGCGC	6.68	5.4	60
2L_10427009_10427075_FBgn0267330_+	KdelR	0.01	0.03	0.16	0.15	7.75	0.135	0.006789	0.02	0.05	0.17	0.16	4.71	0.13	0.014473	38.81	7.75	4.71	0.135	2L_10427009_10427075_FBgn0267330_+	AACGTATGC	ACACTCCCATTTTCATATAGGCG	4.85	7.87	66
2L_11646451_11646557_FBgn0032369_-	CG6614	0.01	0.01	0.12	0.17	14.5	0.135	0.032625	0.02	0.03	0.13	0.14	5.4	0.11	0.004107	31.78	14.5	5.4	0.135	2L_11646451_11646557_FBgn0032369_-	TACGTGAGT	CATTTATTTTACTTCTATAGCGC	7.77	8.15	106
2L_1179938_1179996_FBgn0031319_+	CG4896	0	0.01	0.12	0.16	28	0.135	0.022534	0	0.02	0.11	0.14	12.5	0.115	0.023704	38.98	28	12.5	0.135	2L_1179938_1179996_FBgn0031319_+	AAGGTATGC	CTTTTTTCGCCATCCTTCAGTGT	9.55	8.28	58
2L_1981584_1981641_FBgn0031378_+	CG15362	0.01	0	0.15	0.13	28	0.135	0.006789	0.01	0.01	0.13	0.11	12	0.11	0.008163	50	28	12	0.135	2L_1981584_1981641_FBgn0031378_+	TGGGTAAGC	ACCATTTGCCACGTACCCAGTGC	8.84	4.1	57
2L_20473217_20473268_FBgn0262878_-	CG43233	0.02	0.01	0.17	0.13	10	0.135	0.022534	0.03	0.01	0.16	0.13	7.25	0.125	0.020173	42.31	10	7.25	0.135	2L_20473217_20473268_FBgn0262878_-	TTGGTAAGT	CAAAGTGCCAGTTCTTACAGCTG	10.47	-0.11	51
2L_20644601_20644663_FBgn0016054_-	phr6-4	0.05	0.04	0.17	0.19	4	0.135	0.006789	0.04	0.03	0.15	0.17	4.57	0.125	0.007905	28.57	4.57	4	0.135	2L_20644601_20644663_FBgn0016054_-	GAGGTAAAA	GATTTCTTTTTATCAAACAGGCG	7.3	8.38	62
2L_20724912_20724971_FBgn0032878_-	CG9316	0.05	0.04	0.16	0.2	4	0.135	0.022534	0.04	0.04	0.13	0.18	3.88	0.115	0.044153	26.67	4	3.88	0.135	2L_20724912_20724971_FBgn0032878_-	ATGGTAAGA	TCAAATTTTGTGTTGCCAAGGAA	9.48	3.49	59
2L_22015397_22015452_FBgn0051693_+	CG31693	0.87	0.88	1.02	1	1.15	0.135	0.006789	0.85	0.87	0.96	0.97	1.12	0.105	0.011149	46.43	1.15	1.12	0.135	2L_22015397_22015452_FBgn0051693_+	GATGTGCAT	CATAGTGTTTGTTTTCGCAGCCG	-5.21	6.78	55
2L_275252_275318_FBgn0086855_-	CG17078	0	0	0.12	0.14	NA	0.13	0.005865	0	0	0.14	0.13	NA	0.135	0.001369	22.39	0	0	0.135	2L_275252_275318_FBgn0086855_-	TCAGTAAGT	AAATATTTATCTTCCCACAGATT	9.14	9.28	66
2L_4682922_4682976_FBgn0031620_+	CG11929	0	0.01	0.13	0.15	28	0.135	0.006789	0.01	0.01	0.12	0.15	13.5	0.125	0.014096	38.18	28	13.5	0.135	2L_4682922_4682976_FBgn0031620_+	AAGGTAAAA	TTCACAACGTGCACTTTCAGAAG	8.38	5.36	54
2R_22884794_22884907_FBgn0034792_-	YME1L	0.05	0.05	0.16	0.16	3.2	0.11	0	0.34	0.39	0.5	0.5	1.37	0.135	0.032625	34.21	3.2	1.37	0.135	2R_22884794_22884907_FBgn0034792_-	AAGGTACGA	TTGTCACGCAGACTTTGCAGACT	9.78	-0.16	113
2R_7502591_7502643_FBgn0261397_+	didum	0.01	0	0.12	0.14	26	0.125	0.007905	0.01	0	0.12	0.16	28	0.135	0.022534	33.96	28	26	0.135	2R_7502591_7502643_FBgn0261397_+	CGAGTAAGA	TAAACCGGGTCTATCTGCAGATG	6.87	8.61	52
2R_9775338_9775394_FBgn0265105_+	CR44207	0	0	0.12	0.15	NA	0.135	0.012122	0	0	0.1	0.1	NA	0.1	0	38.6	0	0	0.135	2R_9775338_9775394_FBgn0265105_+	TGAGTAAGT	AAAATGTTCTCGACTTGCAGTCA	8.82	6.13	56
3L_18293346_18293409_FBgn0036784_-	CG5103	0	0	0.15	0.12	NA	0.135	0.012122	0.01	0.01	0.15	0.11	13	0.12	0.026671	34.38	13	13	0.135	3L_18293346_18293409_FBgn0036784_-	CAGGTATGA	GGTATCATGTGTTTCCTCAGATG	9.46	7.61	63
3L_18299766_18299822_FBgn0036785_-	CG13700	0.01	0.01	0.14	0.15	14.5	0.135	0.001369	0.16	0.15	0.3	0.25	1.77	0.12	0.042296	29.82	14.5	1.77	0.135	3L_18299766_18299822_FBgn0036785_-	AGGGTAAAC	CATTTTCATCATTTAAGCAGGTA	4.45	4.35	56
3L_18299769_18299822_FBgn0036785_-	CG13700	0.01	0.01	0.14	0.15	14.5	0.135	0.001369	0	0	0.13	0.12	NA	0.125	0.001596	27.78	14.5	14.5	0.135	3L_18299769_18299822_FBgn0036785_-	AGGGTAAAC	CCACATTTTCATCATTTAAGCAG	4.45	3.55	53
3L_5761119_5761173_FBgn0016756_+	Usp47	0.07	0.06	0.19	0.21	3.08	0.135	0.006789	0.1	0.09	0.23	0.22	2.37	0.13	0.002946	45.45	3.08	2.37	0.135	3L_5761119_5761173_FBgn0016756_+	CAAGTAAGC	CTAACCAATGAATTCAACAGAGA	7.47	2.44	54
3L_7583755_7583816_FBgn0035799_+	CG14838	0	0	0.11	0.16	NA	0.135	0.032625	0.04	0.06	0.14	0.18	3.2	0.11	0.038926	30.65	3.2	3.2	0.135	3L_7583755_7583816_FBgn0035799_+	CTCGTAAGT	CTATTTTGATTTTTATGCAGTGA	9.63	5.47	61
3L_850762_850824_FBgn0035168_+	cep290	0	0	0.14	0.13	NA	0.135	0.001369	0.01	0.02	0.12	0.12	8	0.105	0.00226	31.75	8	8	0.135	3L_850762_850824_FBgn0035168_+	AAGGTAGGT	TTGAAATTTAAAAAAAAAAGGAC	10.29	-1.36	62
3R_13188641_13188706_FBgn0038124_+	CG14380	0.02	0.02	0.15	0.11	6.5	0.11	0.031504	0.02	0.02	0.17	0.14	7.75	0.135	0.012122	51.52	7.75	6.5	0.135	3R_13188641_13188706_FBgn0038124_+	GCGGTTAGT	CCCAGTCATCTGCTCCGCAGATC	5.46	8.03	65
3R_22690018_22690074_FBgn0039003_-	wfs1	0.04	0.03	0.15	0.15	4.29	0.115	0.001885	0.05	0.04	0.18	0.18	4	0.135	0.001369	40.35	4.29	4	0.135	3R_22690018_22690074_FBgn0039003_-	TAGGTGAGT	GAAGATTGCTATGTCCGCAGTAG	8.83	2.55	56
3R_25125775_25125833_FBgn0039280_-	Mocs2	0	0	0.12	0.1	NA	0.11	0.008163	0	0	0.13	0.14	NA	0.135	0.001369	28.81	0	0	0.135	3R_25125775_25125833_FBgn0039280_-	TTCGTAGGT	AAAATTCAATCTATTCTCAGACC	3.61	5.93	58
3R_25125775_25125833_FBgn0260229_-	CG42503	0	0	0.12	0.1	NA	0.11	0.008163	0	0	0.13	0.14	NA	0.135	0.001369	28.81	0	0	0.135	3R_25125775_25125833_FBgn0260229_-	TTCGTAGGT	AAAATTCAATCTATTCTCAGACC	3.61	5.93	58
3R_27250351_27250407_FBgn0039501_-	CG5987	0.05	0.03	0.17	0.18	4.38	0.135	0.006789	0.07	0.05	0.2	0.19	3.25	0.135	0.006789	42.11	4.38	3.25	0.135	3R_27250351_27250407_FBgn0039501_-	CAGGTGATC	CATCTAACATAATCCCCCAGCGA	4.28	5.05	56
3R_30000150_30000210_FBgn0085327_+	CG34298	0.03	0.04	0.16	0.16	4.57	0.125	0.001596	0.03	0.04	0.17	0.17	4.86	0.135	0.001369	32.79	4.86	4.57	0.135	3R_30000150_30000210_FBgn0085327_+	CAAGTGGGT	AAATAACAATCCTCTTCTAGCAT	4.82	4.89	60
3R_32039348_32039397_FBgn0039887_+	CG2053	0.01	0.02	0.14	0.13	9	0.12	0.003454	0.02	0.02	0.16	0.15	7.75	0.135	0.001369	28	9	7.75	0.135	3R_32039348_32039397_FBgn0039887_+	AGGGTAAGG	TTATATAATTTTTCTTTTAGTTT	9.16	8.67	49
3R_5554068_5554128_FBgn0086768_-	Pcmt	0.01	0.02	0.13	0.17	10	0.135	0.022534	0.01	0.02	0.13	0.17	10	0.135	0.022534	47.54	10	10	0.135	3R_5554068_5554128_FBgn0086768_-	AGGGTGAGC	AATAGAACCGAATCCCCAAGATC	7.75	-2.41	60
3R_7186211_7186305_FBgn0037482_-	CG10055	0.02	0.03	0.18	0.13	6.2	0.13	0.036376	0.02	0.04	0.17	0.16	5.5	0.135	0.006789	53.68	6.2	5.5	0.135	3R_7186211_7186305_FBgn0037482_-	CAAGTGAGT	TGTACTCCCTTTTCGGACAGATT	9.1	8.15	94
X_15338023_15338071_FBgn0026428_+	HDAC6	0.02	0.01	0.13	0.17	10	0.135	0.022534	0.03	0.05	0.15	0.14	3.63	0.105	0.011149	51.02	10	3.63	0.135	X_15338023_15338071_FBgn0026428_+	AAGGTGGGT	TCATTCCACTCACTTTGCAGAAG	8.23	8.91	48
X_630645_630702_FBgn0001341_+	l(1)1Bi	0	0	0.11	0.16	NA	0.135	0.032625	0.03	0	0.13	0.17	10	0.135	0.032625	36.21	10	10	0.135	X_630645_630702_FBgn0001341_+	CAGGTTGGT	TTTCTTATGATTTTACGTAGCTA	8.08	4.7	57
2L_10581206_10581260_FBgn0085190_-	CG34161	0.01	0.01	0.12	0.16	14	0.13	0.02286	0.01	0.01	0.07	0.1	8.5	0.075	0.03775	21.82	14	8.5	0.13	2L_10581206_10581260_FBgn0085190_-	TATGTGAGC	TAATAAATAATTTAACTTAGGAA	2.97	3.94	54
2L_269390_269457_FBgn0031240_+	CG3345	0.01	0	0.14	0.13	27	0.13	0.002946	0.01	0	0.13	0.12	25	0.12	0.003454	36.76	27	25	0.13	2L_269390_269457_FBgn0031240_+	GACGTAAGT	CATTCATACATATCCACCAGTTC	10.93	5.19	67
2L_2696338_2696393_FBgn0031446_-	CG15398	0	0	0.14	0.12	NA	0.13	0.005865	0	0	0.11	0.08	NA	0.095	0.024036	37.5	0	0	0.13	2L_2696338_2696393_FBgn0031446_-	CAGGTACGA	TTACTCTCGTTGATCATCAGAAA	10.03	5.21	55
2L_2814180_2814242_FBgn0031462_+	CG2964	0.09	0.1	0.22	0.22	2.32	0.125	0.001596	0.02	0.01	0.14	0.15	9.67	0.13	0.002946	36.51	9.67	2.32	0.13	2L_2814180_2814242_FBgn0031462_+	CTGGTAAGG	CTTCGAATTTATCCTTGCAGATA	9.68	9.91	62
2L_5059560_5059629_FBgn0028694_-	Rpn11	0.01	0.02	0.14	0.15	9.67	0.13	0.002946	0.02	0.02	0.14	0.16	7.5	0.13	0.005865	51.43	9.67	7.5	0.13	2L_5059560_5059629_FBgn0028694_-	GAGGTGAGC	GTATCCTTGTGCCCGGGTAGCCG	8.7	4.56	69
2L_6129981_6130039_FBgn0261683_-	B9d2	0.06	0.05	0.17	0.14	2.82	0.1	0.0241	0.04	0.03	0.18	0.15	4.71	0.13	0.014473	35.59	4.71	2.82	0.13	2L_6129981_6130039_FBgn0261683_-	GCGGTGAGT	AGTAAATATTTCTCGCACAGTTA	10.49	3.35	58
2L_6129981_6130039_FBgn0261697_-	tctn	0.06	0.05	0.17	0.14	2.82	0.1	0.0241	0.04	0.03	0.18	0.15	4.71	0.13	0.014473	35.59	4.71	2.82	0.13	2L_6129981_6130039_FBgn0261697_-	GCGGTGAGT	AGTAAATATTTCTCGCACAGTTA	10.49	3.35	58
2L_6687198_6687253_FBgn0031850_-	Tsp	0.02	0	0.15	0.13	14	0.13	0.011628	0.02	0	0.14	0.14	14	0.13	0.005865	51.79	14	14	0.13	2L_6687198_6687253_FBgn0031850_-	GCAGTGAGT	CATTCTCCTTCTACCCACAGAAT	7.39	11.02	55
2R_12150140_12150529_FBgn0027504_-	CG8878	0.59	0.56	0.72	0.69	1.23	0.13	0.025609	0.09	0.09	0.17	0.15	1.78	0.07	0.019804	34.36	1.78	1.23	0.13	2R_12150140_12150529_FBgn0027504_-	CAGGCTAGT	TAATCTTCTTCTTTCATCAGCAG	0.27	5.06	389
2R_12304902_12304964_FBgn0061197_-	CG13164	0.01	0.01	0.14	0.14	14	0.13	0	0	0	0.12	0.12	NA	0.12	0	38.1	14	14	0.13	2R_12304902_12304964_FBgn0061197_-	GTGGTATGT	CTATTTTATTGTGTCTCCAGGAA	7.64	9.6	62
2R_13207350_13207405_FBgn0033806_+	FLASH	0	0.01	0.09	0.07	16	0.075	0.021508	0.01	0.02	0.15	0.14	9.67	0.13	0.002946	44.64	16	9.67	0.13	2R_13207350_13207405_FBgn0033806_+	CGTGTAAGT	ACCCATTTACCATCTCACAGAAT	8.58	7.21	55
2R_15564662_15564721_FBgn0034032_-	CG8195	0	0	0.14	0.12	NA	0.13	0.005865	0	0.02	0.13	0.11	12	0.11	0.01613	25	12	12	0.13	2R_15564662_15564721_FBgn0034032_-	AAGGTGATA	ATTTTGATATACTTTACTAGTTC	4.18	4.56	59
2R_16099016_16099078_FBgn0083983_+	mRpL34	0.03	0.07	0.19	0.17	3.6	0.13	0.028334	0.11	0.12	0.19	0.22	1.78	0.09	0.029505	30.16	3.6	1.78	0.13	2R_16099016_16099078_FBgn0083983_+	AAGGCGAGT	AACATACATTGGCATTGCAGGAC	2.72	5.29	62
2R_22709660_22709714_FBgn0050275_+	CG30275	0	0	0.09	0.1	NA	0.095	0.002759	0.05	0.02	0.14	0.19	4.71	0.13	0.046794	34.55	4.71	4.71	0.13	2R_22709660_22709714_FBgn0050275_+	ATGGTAGGC	TAAAATAGTTCATACACCAGCCA	7.42	-3.23	54
2R_22885244_22885296_FBgn0034792_-	YME1L	0.01	0	0.11	0.12	23	0.11	0.004107	0.01	0.01	0.14	0.14	14	0.13	0	28.3	23	14	0.13	2R_22885244_22885296_FBgn0034792_-	GCTGTAATT	TCAAATTTAGCTCTTTATAGAAA	-0.92	1.03	52
2R_23601621_23601673_FBgn0067903_-	IM18	0	0	0.11	0.15	NA	0.13	0.02286	0.01	0.01	0.1	0.13	11.5	0.105	0.019804	26.42	11.5	11.5	0.13	2R_23601621_23601673_FBgn0067903_-	CAGGTAGGT	CATAACATTTTGATATATAGAAG	10.28	2.79	52
2R_23601621_23601673_FBgn0260455_-	CG10332	0	0	0.11	0.15	NA	0.13	0.02286	0.01	0.01	0.1	0.13	11.5	0.105	0.019804	26.42	11.5	11.5	0.13	2R_23601621_23601673_FBgn0260455_-	CAGGTAGGT	CATAACATTTTGATATATAGAAG	10.28	2.79	52
2R_5340513_5340561_FBgn0033017_-	CG10465	0.02	0.02	0.12	0.16	7	0.12	0.026671	0.02	0.02	0.12	0.18	7.5	0.13	0.049346	22.45	7.5	7	0.13	2R_5340513_5340561_FBgn0033017_-	AAGGTTTGT	ATTAATATACAAAATTCTAGGAT	7.81	4.47	48
2R_7539213_7539296_FBgn0033191_-	CG1598	0.03	0.04	0.17	0.16	4.71	0.13	0.002946	0.01	0.02	0.14	0.14	9.33	0.125	0.001596	40.48	9.33	4.71	0.13	2R_7539213_7539296_FBgn0033191_-	AAGGTTGGT	AATTCCTTTTCCGCAACCAGGTA	8.46	7.51	83
2R_7539415_7539477_FBgn0033191_-	CG1598	0.01	0.04	0.16	0.15	6.2	0.13	0.014473	0.02	0.04	0.16	0.16	5.33	0.13	0.005865	33.33	6.2	5.33	0.13	2R_7539415_7539477_FBgn0033191_-	CAGGTAAAA	AATCTTCGTGTTAAACATAGTTC	8.59	3.2	62
2R_8703756_8703813_FBgn0033323_+	CG12376	0.04	0.02	0.15	0.17	5.33	0.13	0.011628	0.07	0.05	0.18	0.2	3.17	0.13	0.011628	46.55	5.33	3.17	0.13	2R_8703756_8703813_FBgn0033323_+	TCGGTGAGT	CGTGAGTTTCGAATTCACAGGTG	11.11	5.23	57
3L_11066275_11066360_FBgn0025355_+	SuUR	0	0	0.1	0.16	NA	0.13	0.049346	0	0	0.09	0.09	NA	0.09	0	36.05	0	0	0.13	3L_11066275_11066360_FBgn0025355_+	CAAGTAGGT	ATAACTTATATAATTTGTAGGGA	7.33	6.11	85
3L_11066275_11066360_FBgn0266540_+	CG45101	0	0	0.1	0.16	NA	0.13	0.049346	0	0	0.09	0.09	NA	0.09	0	36.05	0	0	0.13	3L_11066275_11066360_FBgn0266540_+	CAAGTAGGT	ATAACTTATATAATTTGTAGGGA	7.33	6.11	85
3L_12783691_12783744_FBgn0036311_+	CG17666	0	0	0.13	0.13	NA	0.13	0	0	0	0.11	0.11	NA	0.11	0	46.3	0	0	0.13	3L_12783691_12783744_FBgn0036311_+	TGAGTGAGT	GTAATTAATGCGTTTCGCAGGGA	6.51	5.15	53
3L_16097935_16097997_FBgn0036568_+	ATPsynbetaL	0.01	0	0.11	0.15	26	0.125	0.026138	0.02	0.01	0.12	0.17	9.67	0.13	0.036376	34.92	26	9.67	0.13	3L_16097935_16097997_FBgn0036568_+	CAGGTAAGA	AATGAAAAAAACCATGTTAGCAT	10.77	-2.22	62
3L_1756537_1756611_FBgn0035268_+	CG8001	0.02	0.02	0.11	0.15	6.5	0.11	0.031504	0.05	0.06	0.16	0.21	3.36	0.13	0.036376	50.67	6.5	3.36	0.13	3L_1756537_1756611_FBgn0035268_+	TGGGTAAGT	TTTCGCCCGTGGGGAACCAGTGA	10.24	1.67	74
3L_18919623_18919671_FBgn0036832_-	CG18223	0.03	0.03	0.19	0.13	5.33	0.13	0.049346	0.02	0.03	0.14	0.12	5.2	0.105	0.011149	28.57	5.33	5.2	0.13	3L_18919623_18919671_FBgn0036832_-	AAGGTAAGT	AGGTTTATTATTAACTATAGGGC	11	4.46	48
3L_7535645_7536710_FBgn0028582_+	lqf	0.01	0.01	0.06	0.07	6.5	0.055	0.008163	0.23	0.24	0.37	0.36	1.55	0.13	0.002946	43.25	6.5	1.55	0.13	3L_7535645_7536710_FBgn0028582_+	CAGGTGAGT	ATAATATTTTCTAATTGTAGCCA	10.67	6.35	1065
3L_8720906_8720960_FBgn0052022_-	CG32022	0.01	0.01	0.13	0.15	14	0.13	0.005865	0.01	0.01	0.11	0.13	12	0.11	0.008163	50.91	14	12	0.13	3L_8720906_8720960_FBgn0052022_-	TACGTGAGT	AACCTTATCCTGACCTGCAGCTC	7.77	7.05	54
3R_15195805_15195862_FBgn0038296_-	CG6752	0.03	0.01	0.14	0.14	7	0.12	0.006873	0.01	0	0.13	0.14	27	0.13	0.002946	44.83	27	7	0.13	3R_15195805_15195862_FBgn0038296_-	CAAGTAGGA	TGGACAATCCTTTCCCTTAGGCA	4.46	7.57	57
3R_4486532_4486595_FBgn0037255_+	Fip1	0.07	0.02	0.18	0.17	3.89	0.13	0.036376	0.07	0.02	0.16	0.18	3.78	0.125	0.043402	40.62	3.89	3.78	0.13	3R_4486532_4486595_FBgn0037255_+	TGAGTGCGT	ATCTATGTTTTCTCTTGCAGACA	1.76	12.26	63
X_11990906_11990976_FBgn0030359_-	CG18130	0	0	0.14	0.09	NA	0.115	0.044153	0	0	0.15	0.11	NA	0.13	0.02286	46.48	0	0	0.13	X_11990906_11990976_FBgn0030359_-	ATCGTACGT	TTTTTCTTGCCCAACTGCAGTGG	8.34	6.73	70
X_18885963_18886019_FBgn0030973_+	CG7332	0.03	0.03	0.12	0.15	4.5	0.105	0.019804	0.05	0.04	0.16	0.19	3.89	0.13	0.014473	45.61	4.5	3.89	0.13	X_18885963_18886019_FBgn0030973_+	GAGGTTGGT	TAATCTCCACATTTATTCAGATT	6.36	4.56	56
X_19744682_19744754_FBgn0066303_+	CG33932	0.02	0.03	0.12	0.16	5.6	0.115	0.030666	0.03	0.05	0.16	0.18	4.25	0.13	0.011628	49.32	5.6	4.25	0.13	X_19744682_19744754_FBgn0066303_+	AAGGCAAGT	AGAGTCCATCTCCTTGACAGGCC	3.24	5.38	72
X_19744682_19744754_FBgn0066304_+	Rpp20	0.02	0.03	0.12	0.16	5.6	0.115	0.030666	0.03	0.05	0.16	0.18	4.25	0.13	0.011628	49.32	5.6	4.25	0.13	X_19744682_19744754_FBgn0066304_+	AAGGCAAGT	AGAGTCCATCTCCTTGACAGGCC	3.24	5.38	72
X_9170223_9170303_FBgn0026206_+	mei-P26	0	0	0.11	0.1	NA	0.105	0.00226	0	0.01	0.15	0.12	27	0.13	0.014473	43.21	27	27	0.13	X_9170223_9170303_FBgn0026206_+	GAGGTGAGC	ATTGTGCCCGCGCCCACCAGACA	8.7	4.94	80
2L_11097300_11097407_FBgn0032340_-	--	0.03	0	0.14	0.14	9.33	0.125	0.014096	0.05	0.05	0.14	0.12	2.6	0.08	0.015268	27.78	9.33	2.6	0.125	2L_11097300_11097407_FBgn0032340_-	TAGGTAAGT	TTCACATAAATTATTTGCAGATC	9.66	7.45	107
2L_13195680_13195749_FBgn0032480_+	Edem2	0	0	0.11	0.14	NA	0.125	0.014096	0	0	0.1	0.13	NA	0.115	0.016591	25.71	0	0	0.125	2L_13195680_13195749_FBgn0032480_+	CAGGTTTGC	AATGGTTTTCTCGTTTATAGGCC	4.86	9.81	69
2L_15256698_15256748_FBgn0259982_+	l(2)35Cc	0.01	0.01	0.15	0.12	13.5	0.125	0.014096	0.01	0	0.12	0.09	21	0.1	0.0241	35.29	21	13.5	0.125	2L_15256698_15256748_FBgn0259982_+	CGAGTAAGT	AGTGTAAGACCCAATTACAGGCA	10.15	-0.56	50
2L_22102923_22102971_FBgn0051703_-	CG31703	0.01	0.03	0.13	0.16	7.25	0.125	0.020173	0.01	0.02	0.1	0.15	8.33	0.11	0.049745	28.57	8.33	7.25	0.125	2L_22102923_22102971_FBgn0051703_-	TGGGTAAGG	GTAATACTATTTCTTTATAGTTC	9.08	6.38	48
2L_22550489_22550547_FBgn0040010_+	CG17493	0.02	0.01	0.1	0.14	8	0.105	0.036454	0.02	0.01	0.12	0.16	9.33	0.125	0.026138	30.51	9.33	8	0.125	2L_22550489_22550547_FBgn0040010_+	TACGTGAGT	AACGTTAATCCCAATTTAAGCCA	7.77	2.56	58
2L_7225857_7227103_FBgn0259111_-	Ndae1	0.26	0.26	0.39	0.38	1.48	0.125	0.001596	0.12	0.11	0.23	0.25	2.09	0.125	0.007905	37.45	2.09	1.48	0.125	2L_7225857_7227103_FBgn0259111_-	GAGGTGGGC	ATGCCAATTTTATATTGAAGGAC	6.32	5.48	1246
2L_9097712_9097769_FBgn0051609_+	CG31609	0	0.01	0.12	0.14	26	0.125	0.007905	0	0	0.09	0.12	NA	0.105	0.019804	24.14	26	26	0.125	2L_9097712_9097769_FBgn0051609_+	AACGTAGGT	AAAATTGTATATATTCTTAGCAA	7.3	2.2	57
2R_12305872_12305930_FBgn0061197_-	CG13164	0.01	0.01	0.13	0.14	13.5	0.125	0.001596	0.01	0.01	0.11	0.13	12	0.11	0.008163	40.68	13.5	12	0.125	2R_12305872_12305930_FBgn0061197_-	TGGGTGAGT	GCTTTACATCCCCGTCCCAGTCT	8.73	4.51	58
2R_12754751_12754825_FBgn0026619_-	Taz	0.03	0.06	0.17	0.17	3.78	0.125	0.014096	0.02	0.04	0.12	0.12	4	0.09	0.012122	48	4	3.78	0.125	2R_12754751_12754825_FBgn0026619_-	ATGGTCAGC	CCCTTATCTCGTTTCCACAGCCA	4.01	10.5	74
2R_13959100_13959204_FBgn0033886_-	Rpn13	0.68	0.7	0.82	0.81	1.18	0.125	0.007905	0.55	0.58	0.68	0.68	1.2	0.115	0.016591	52.38	1.2	1.18	0.125	2R_13959100_13959204_FBgn0033886_-	CCGGTAAGA	CTCCCCCGAACATGGCGCAGGAC	10.1	3.59	104
2R_16999945_16999997_FBgn0034175_-	ste24b	0.01	0.01	0.14	0.13	13.5	0.125	0.001596	0.01	0	0.13	0.12	25	0.12	0.003454	32.08	25	13.5	0.125	2R_16999945_16999997_FBgn0034175_-	GACGTAAGT	GGATTAAATTGCTCTTTCAGATA	10.93	8.14	52
2R_18168139_18168207_FBgn0260392_+	CG42518	0	0	0.12	0.13	NA	0.125	0.001596	0	0	0.1	0.13	NA	0.115	0.016591	43.48	0	0	0.125	2R_18168139_18168207_FBgn0260392_+	CAAGTGAGT	ATGCATTTTCCAAATTGTAGATC	9.1	6.31	68
2R_18168139_18168207_FBgn0260401_+	MED9	0	0	0.12	0.13	NA	0.125	0.001596	0	0	0.1	0.13	NA	0.115	0.016591	43.48	0	0	0.125	2R_18168139_18168207_FBgn0260401_+	CAAGTGAGT	ATGCATTTTCCAAATTGTAGATC	9.1	6.31	68
2R_23359597_23359669_FBgn0085453_+	CG34424	0.09	0.09	0.19	0.24	2.39	0.125	0.03775	0.06	0.09	0.16	0.15	2.07	0.08	0.036913	50.68	2.39	2.07	0.125	2R_23359597_23359669_FBgn0085453_+	AAGGTAACA	TAATCGGCTCGATCGCACAGGTG	8.92	5.03	72
2R_23600550_23600604_FBgn0260761_-	CG42559	0	0	0.11	0.14	NA	0.125	0.014096	0.02	0.02	0.12	0.15	6.75	0.115	0.016591	23.64	6.75	6.75	0.125	2R_23600550_23600604_FBgn0260761_-	TTGGTATGT	GTAAATCTTCTAAATATTAGTTG	7.12	0.88	54
2R_23600550_23600604_FBgn0260762_-	CG42560	0	0	0.11	0.14	NA	0.125	0.014096	0.02	0.02	0.12	0.15	6.75	0.115	0.016591	23.64	6.75	6.75	0.125	2R_23600550_23600604_FBgn0260762_-	TTGGTATGT	GTAAATCTTCTAAATATTAGTTG	7.12	0.88	54
2R_23601483_23601550_FBgn0067903_-	IM18	0.02	0.03	0.14	0.16	6	0.125	0.007905	0	0	0.1	0.13	NA	0.115	0.016591	38.24	6	6	0.125	2R_23601483_23601550_FBgn0067903_-	ACAGTAAGT	TAATCAAATCCCATCGTCAGGAA	9.49	3.03	67
2R_23601483_23601550_FBgn0260455_-	CG10332	0.02	0.03	0.14	0.16	6	0.125	0.007905	0	0	0.1	0.13	NA	0.115	0.016591	38.24	6	6	0.125	2R_23601483_23601550_FBgn0260455_-	ACAGTAAGT	TAATCAAATCCCATCGTCAGGAA	9.49	3.03	67
2R_24430289_24430350_FBgn0035003_-	CG15873	0	0.01	0.13	0.1	23	0.11	0.020042	0	0	0.13	0.12	NA	0.125	0.001596	46.77	23	23	0.125	2R_24430289_24430350_FBgn0035003_-	GGAGTAAGT	AATCAAGCAATCCTCCACAGCCG	8.57	1.74	61
2R_25139012_25139063_FBgn0262566_-	CG43106	0.04	0.05	0.13	0.11	2.67	0.075	0.021508	0.02	0.02	0.15	0.14	7.25	0.125	0.001596	36.54	7.25	2.67	0.125	2R_25139012_25139063_FBgn0262566_-	ACGGTAAGT	TTTCTAAATGGGAAGCGCAGGCA	11.81	-5.04	51
2R_8464600_8464652_FBgn0050359_+	Mal-A5	0	0	0.14	0.09	NA	0.115	0.044153	0	0	0.14	0.11	NA	0.125	0.014096	35.85	0	0	0.125	2R_8464600_8464652_FBgn0050359_+	ACGGTGACA	AATAACAATTGATTTCGCAGGTA	3.16	7.05	52
3L_12008816_12008878_FBgn0041096_-	rols	0	0	0.08	0.09	NA	0.085	0.003442	0	0	0.15	0.1	NA	0.125	0.03775	34.92	0	0	0.125	3L_12008816_12008878_FBgn0041096_-	AATGTAAGT	ACCATATCTGTAATTCGCAGGAA	8.62	8.21	62
3L_15558339_15558393_FBgn0087035_+	AGO2	0.03	0	0.12	0.1	7.33	0.095	0.034176	0.03	0	0.14	0.14	9.33	0.125	0.014096	34.55	9.33	7.33	0.125	3L_15558339_15558393_FBgn0087035_+	TACGTAAAT	TTGAACGCGCTCCTCTGCAGTTA	-1.95	5.98	54
3L_16129713_16129907_FBgn0011016_+	SsRbeta	0.02	0.01	0.07	0.1	5.67	0.07	0.047421	0.03	0.04	0.14	0.18	4.57	0.125	0.026138	41.54	5.67	4.57	0.125	3L_16129713_16129907_FBgn0011016_+	CAAGTAAGT	CATATTATCTGTGATTGTAGAAT	10.08	4.64	194
3L_17037031_17037083_FBgn0261872_-	scaf6	0.15	0.16	0.24	0.26	1.61	0.095	0.013569	0.18	0.17	0.29	0.31	1.71	0.125	0.007905	41.51	1.71	1.61	0.125	3L_17037031_17037083_FBgn0261872_-	AAGGTGAAG	TTATAATTTTCTATCCACAGGGA	5.73	10.57	52
3L_8621197_8621251_FBgn0052351_+	S-Lap2	0.04	0.04	0.15	0.17	4	0.12	0.006873	0.04	0.04	0.16	0.17	4.12	0.125	0.001596	40	4.12	4	0.125	3L_8621197_8621251_FBgn0052351_+	CCGGTAAGT	TAACCATATATTACCGTTAGGTC	10.91	6.29	54
3L_8906709_8906818_FBgn0266757_-	mfr	0.02	0.06	0.16	0.17	4.12	0.125	0.026138	0.05	0.03	0.12	0.14	3.25	0.09	0.023813	39.09	4.12	3.25	0.125	3L_8906709_8906818_FBgn0266757_-	CTGGTAAGC	ATAATTTATATATTTTTTAGATG	8.69	7.87	109
3R_11748735_11748789_FBgn0037944_-	CG6923	0.08	0.07	0.21	0.19	2.67	0.125	0.007905	0.07	0.08	0.22	0.18	2.67	0.125	0.026138	47.27	2.67	2.67	0.125	3R_11748735_11748789_FBgn0037944_-	ACCGTAAGC	ATCCTCTTGTGCTTTTGCAGATT	5.9	10.81	54
3R_12110688_12110831_FBgn0051361_+	dpr17	0.01	0.01	0.12	0.15	13.5	0.125	0.014096	0.03	0.02	0.11	0.13	4.8	0.095	0.013569	46.53	13.5	4.8	0.125	3R_12110688_12110831_FBgn0051361_+	GCGGTAAGT	CGAATTGCGATGGCCAACAGGTG	11.37	3.32	143
3R_18898576_18898636_FBgn0038655_+	CG14297	0.03	0.02	0.17	0.13	6	0.125	0.026138	0.03	0.02	0.15	0.12	5.4	0.11	0.020042	36.07	6	5.4	0.125	3R_18898576_18898636_FBgn0038655_+	CAGGTGAAC	ATAGATTCTTACTTCTATAGTTC	5.56	4.08	60
3R_20043740_20043821_FBgn0064119_+	CG33934	0	0	0.12	0.13	NA	0.125	0.001596	0	0	0.11	0.13	NA	0.12	0.006873	26.83	0	0	0.125	3R_20043740_20043821_FBgn0064119_+	ACCGTGAGT	AAACATTCTACAATTCAAAGAAC	9.4	0.51	81
3R_20043740_20043821_FBgn0260466_+	Indy-2	0	0	0.12	0.13	NA	0.125	0.001596	0	0	0.11	0.13	NA	0.12	0.006873	26.83	0	0	0.125	3R_20043740_20043821_FBgn0260466_+	ACCGTGAGT	AAACATTCTACAATTCAAAGAAC	9.4	0.51	81
3R_22383143_22383204_FBgn0263048_+	CG43343	0.01	0.01	0.13	0.14	13.5	0.125	0.001596	0.02	0.01	0.13	0.13	8.67	0.115	0.001885	24.19	13.5	8.67	0.125	3R_22383143_22383204_FBgn0263048_+	TTGGTATGT	TCAACTGCGCTAATTTAAAGTCG	7.12	1.15	61
3R_23189130_23189187_FBgn0262975_-	cnc	0	0	0.12	0.13	NA	0.125	0.001596	0	0	0.09	0.09	NA	0.09	0	29.31	0	0	0.125	3R_23189130_23189187_FBgn0262975_-	AAGGTTTAA	CCTATTATTTTTCATTGCAGGCT	1.88	8.63	57
3R_24633500_24633557_FBgn0039213_+	atl	0	0	0.11	0.14	NA	0.125	0.014096	0	0.01	0.1	0.13	23	0.11	0.020042	46.55	23	23	0.125	3R_24633500_24633557_FBgn0039213_+	AAAGTAAGT	AACCTACGCTATGCTTGCAGTTC	9.72	5.15	57
3R_26984637_26984704_FBgn0039467_+	CG14253	0	0	0.09	0.14	NA	0.115	0.044153	0	0	0.11	0.14	NA	0.125	0.014096	26.47	0	0	0.125	3R_26984637_26984704_FBgn0039467_+	CTCGTGAGT	AACCGAATAATATTTTTCAGAGT	8.41	5.14	67
X_12586250_12586309_FBgn0041203_-	--	0	0	0.13	0.12	NA	0.125	0.001596	0	0.01	0.12	0.11	23	0.11	0.004107	38.33	23	23	0.125	X_12586250_12586309_FBgn0041203_-	ATGGTAAGC	CACACACTTTGCACCTGCAGCGG	9.26	8.15	59
X_13714960_13715032_FBgn0265726_+	Nna1	0.01	0.01	0.15	0.12	13.5	0.125	0.014096	0.02	0.03	0.15	0.15	6	0.125	0.001596	47.95	13.5	6	0.125	X_13714960_13715032_FBgn0265726_+	AAGGTAAGT	TACCCCAATCCGAACTACAGTTT	11	1.5	72
X_13714960_13715762_FBgn0265726_+	Nna1	0.01	0.01	0.15	0.12	13.5	0.125	0.014096	0.79	0.82	0.88	0.89	1.1	0.08	0.036913	48.94	13.5	1.1	0.125	X_13714960_13715762_FBgn0265726_+	AAGGTAAGT	AATCGGCTTAGTCCACGCAGGCG	11	0.24	802
X_13955676_13955744_FBgn0030536_+	CG11068	0	0	0.1	0.1	NA	0.1	0	0.02	0.03	0.14	0.16	6	0.125	0.007905	36.23	6	6	0.125	X_13955676_13955744_FBgn0030536_+	TCGGTAAGT	ACTGTCTTCAACTATAACAGCAA	11.78	5.63	68
X_9256378_9256442_FBgn0028292_+	ric8a	0.03	0	0.14	0.13	9	0.12	0.016922	0.03	0.03	0.17	0.14	5.17	0.125	0.014096	50.77	9	5.17	0.125	X_9256378_9256442_FBgn0028292_+	AAGGTGAGC	TACCCTTCCTTCTGCCGTAGAAT	9.6	9.92	64
X_9601177_9601253_FBgn0030141_+	Gga	0	0	0.11	0.14	NA	0.125	0.014096	0.04	0.04	0.13	0.14	3.38	0.095	0.002759	54.55	3.38	3.38	0.125	X_9601177_9601253_FBgn0030141_+	TGGGTGAGT	GCATTTCGCCTGCAACGCAGAGA	8.73	2.84	76
2L_12912700_12912747_FBgn0040508_+	ACXC	0.01	0.02	0.15	0.12	9	0.12	0.016922	0.02	0.02	0.14	0.1	6	0.1	0.03775	35.42	9	6	0.12	2L_12912700_12912747_FBgn0040508_+	AGGGTAAGC	AATAAGGTTTTCGTCTATAGGAA	9.04	6.87	47
2L_13834884_13834938_FBgn0260407_-	mRpS23	0.22	0.23	0.32	0.37	1.53	0.12	0.042296	0.18	0.17	0.23	0.26	1.4	0.07	0.047421	43.64	1.53	1.4	0.12	2L_13834884_13834938_FBgn0260407_-	CAGGTATTT	TAAACACCCGACTCTTGCAGAGT	7.51	5.49	54
2L_17410031_17410087_FBgn0032634_-	Rpb11	0.03	0.04	0.14	0.13	3.86	0.1	0.004963	0.03	0.05	0.18	0.14	4	0.12	0.033012	43.86	4	3.86	0.12	2L_17410031_17410087_FBgn0032634_-	CAAGTATGT	ATTTGCATTCTTGCCTGCAGCCA	7.44	8.66	56
2L_17487075_17487139_FBgn0003187_-	qua	0.03	0.02	0.17	0.12	5.8	0.12	0.042296	0.01	0.01	0.15	0.11	13	0.12	0.026671	38.46	13	5.8	0.12	2L_17487075_17487139_FBgn0003187_-	GAGGTGGGT	ACGCTGTTTTCCAACCGCAGGTT	7.07	9.57	64
2L_20094354_20094438_FBgn0032848_+	nesd	0.01	0.02	0.16	0.11	9	0.12	0.042296	0.03	0.02	0.15	0.13	5.6	0.115	0.00932	38.82	9	5.6	0.12	2L_20094354_20094438_FBgn0032848_+	CAGGTAAGC	TATCTATATGGGATATATAGGAT	9.88	2.17	84
2L_6760226_6760559_FBgn0031857_-	LUBEL	0	0	0.12	0.12	NA	0.12	0	0	0	0.05	0.08	NA	0.065	0.049346	38.92	0	0	0.12	2L_6760226_6760559_FBgn0031857_-	GAGGTAGGT	AATCTCGATCTTACTTTTAGGTA	9.65	8.44	333
2L_8161428_8161492_FBgn0261064_+	Rbsn-5	0.01	0.01	0.1	0.15	12.5	0.115	0.044153	0.02	0.04	0.14	0.16	5	0.12	0.013606	41.54	12.5	5	0.12	2L_8161428_8161492_FBgn0261064_+	GGGGTATGT	TGATTCCATTTGCTTCACAGTCT	7.48	6.89	64
2R_10904638_10904697_FBgn0033572_+	polyph	0.01	0.02	0.13	0.12	8.33	0.11	0.004107	0.01	0.03	0.14	0.14	7	0.12	0.006873	23.33	8.33	7	0.12	2R_10904638_10904697_FBgn0033572_+	TCTGTAAGT	TATTGTTTCTTATTCTCCAGATG	7.96	9.96	59
2R_13130112_13130166_FBgn0033794_-	CG13326	0.01	0.01	0.1	0.13	11.5	0.105	0.019804	0.01	0.01	0.12	0.14	13	0.12	0.006873	41.82	13	11.5	0.12	2R_13130112_13130166_FBgn0033794_-	GCGGTGGGT	TTTATGGTAACTTTTCCCAGATG	6.6	5.59	54
2R_18682267_18682409_FBgn0265626_-	CG44434	0.03	0.02	0.14	0.15	5.8	0.12	0.003454	0.02	0.02	0.1	0.12	5.5	0.09	0.012122	33.57	5.8	5.5	0.12	2R_18682267_18682409_FBgn0265626_-	AGTGTAAGA	TGTATGGTTTCCTCCCAAAGGGC	4.57	6.74	142
2R_18682267_18682409_FBgn0265627_-	CG44435	0.03	0.02	0.14	0.15	5.8	0.12	0.003454	0.02	0.02	0.1	0.12	5.5	0.09	0.012122	33.57	5.8	5.5	0.12	2R_18682267_18682409_FBgn0265627_-	AGTGTAAGA	TGTATGGTTTCCTCCCAAAGGGC	4.57	6.74	142
2R_21012103_21012161_FBgn0034572_+	CG9346	0	0	0.09	0.13	NA	0.11	0.031504	0	0.03	0.14	0.13	9	0.12	0.016922	44.07	9	9	0.12	2R_21012103_21012161_FBgn0034572_+	AAAGTAAAG	TTTTTCGGTCTTGTTTTCAGCGG	1.6	9.79	58
2R_22059860_22059911_FBgn0034684_-	CG13501	0.04	0.01	0.16	0.12	5.6	0.115	0.044153	0.05	0.02	0.15	0.16	4.43	0.12	0.016922	38.46	5.6	4.43	0.12	2R_22059860_22059911_FBgn0034684_-	AAGGTGAGC	GGTGTTATATTTTTTCCTAGTTC	9.6	6.05	51
2R_23139766_23139819_FBgn0034826_-	CG13544	0	0	0.13	0.11	NA	0.12	0.006873	0	0	0.11	0.1	NA	0.105	0.00226	38.89	0	0	0.12	2R_23139766_23139819_FBgn0034826_-	AAAGTGAGT	TGAAATATCGCCACCAACAGCTG	8.4	3.86	53
2R_23949923_23949982_FBgn0034936_+	CG2970	0.01	0.01	0.12	0.14	13	0.12	0.006873	0.02	0.02	0.11	0.12	5.75	0.095	0.002759	48.33	13	5.75	0.12	2R_23949923_23949982_FBgn0034936_+	AAGGTAGGT	TCTGTTATATCACCGTTAAGCCT	10.29	1.63	59
2R_24125571_24125627_FBgn0264297_-	CG43775	0.02	0.03	0.12	0.09	4.2	0.08	0.036913	0.01	0	0.11	0.14	25	0.12	0.016922	42.11	25	4.2	0.12	2R_24125571_24125627_FBgn0264297_-	CTGGTGAGA	TACATCGTTTGTTGTTGCAGGAG	7.54	8.25	56
2R_24125571_24125627_FBgn0264298_-	CG43776	0.02	0.03	0.12	0.09	4.2	0.08	0.036913	0.01	0	0.11	0.14	25	0.12	0.016922	42.11	25	4.2	0.12	2R_24125571_24125627_FBgn0264298_-	CTGGTGAGA	TACATCGTTTGTTGTTGCAGGAG	7.54	8.25	56
2R_24125571_24125627_FBgn0264299_-	CG43777	0.02	0.03	0.12	0.09	4.2	0.08	0.036913	0.01	0	0.11	0.14	25	0.12	0.016922	42.11	25	4.2	0.12	2R_24125571_24125627_FBgn0264299_-	CTGGTGAGA	TACATCGTTTGTTGTTGCAGGAG	7.54	8.25	56
2R_24534188_24534243_FBgn0035021_-	CG4622	0.03	0.05	0.18	0.14	4	0.12	0.033012	0.02	0.01	0.13	0.09	7.33	0.095	0.044006	35.71	7.33	4	0.12	2R_24534188_24534243_FBgn0035021_-	GACGTAAGT	ATTATCCCACAAACCCACAGGAT	10.93	6.49	55
2R_24534364_24534414_FBgn0035021_-	CG4622	0.03	0	0.12	0.15	9	0.12	0.029857	0	0	0.11	0.11	NA	0.11	0	47.06	9	9	0.12	2R_24534364_24534414_FBgn0035021_-	GATGTAAGT	TCTATATATACTCCTTGCAGGGC	9.11	8.1	50
2R_6093950_6094009_FBgn0000546_-	EcR	0	0	0.14	0.1	NA	0.12	0.026671	0	0	0.11	0.1	NA	0.105	0.00226	30	0	0	0.12	2R_6093950_6094009_FBgn0000546_-	ATGGTGGGT	TTGATTTCTATGCCTTGCAGAGT	6.18	8.32	59
3L_11170150_11170209_FBgn0036142_+	CG7616	0.02	0.02	0.14	0.13	6.75	0.115	0.001885	0.03	0.03	0.15	0.15	5	0.12	0	38.33	6.75	5	0.12	3L_11170150_11170209_FBgn0036142_+	CAGGTGAGT	AATACATTCTAAAATCTTAGCGT	10.67	4.62	59
3L_1330048_1330130_FBgn0011361_+	ND-ACP	0.13	0.14	0.27	0.24	1.89	0.12	0.016922	0.11	0.12	0.23	0.19	1.83	0.095	0.044006	53.01	1.89	1.83	0.12	3L_1330048_1330130_FBgn0011361_+	AGCGTAAAT	CCGCTGCGTTTCCGTTGCAGGAG	-2.73	10.67	82
3L_1606901_1606959_FBgn0035239_+	CG18170	0	0	0.11	0.12	NA	0.115	0.001885	0.04	0.05	0.16	0.17	3.67	0.12	0.003454	47.46	3.67	3.67	0.12	3L_1606901_1606959_FBgn0035239_+	AAGGTGAGT	TGATAATCTGCATTTCGCAGTAT	10.47	4.53	58
3L_1606901_1606959_FBgn0035240_+	CG33791	0	0	0.11	0.12	NA	0.115	0.001885	0.04	0.05	0.16	0.17	3.67	0.12	0.003454	47.46	3.67	3.67	0.12	3L_1606901_1606959_FBgn0035240_+	AAGGTGAGT	TGATAATCTGCATTTCGCAGTAT	10.47	4.53	58
3L_16113366_16113884_FBgn0010280_+	Taf4	0.13	0.14	0.24	0.22	1.7	0.095	0.013569	0.59	0.63	0.73	0.73	1.2	0.12	0.026671	43.35	1.7	1.2	0.12	3L_16113366_16113884_FBgn0010280_+	GAAGTGAGT	TCAAAATAATCAAAATAAAGCAT	7.97	-2.77	518
3L_16113366_16114311_FBgn0010280_+	Taf4	0.13	0.14	0.24	0.22	1.7	0.095	0.013569	0.05	0.06	0.18	0.17	3.18	0.12	0.003454	49.79	3.18	1.7	0.12	3L_16113366_16114311_FBgn0010280_+	GAAGTGAGT	CGCCTCCCCTTGCATTGCAGTTC	7.97	8.55	945
3L_16114142_16114311_FBgn0010280_+	Taf4	0.07	0.04	0.18	0.17	3.18	0.12	0.016922	0.05	0.06	0.18	0.17	3.18	0.12	0.003454	58.24	3.18	3.18	0.12	3L_16114142_16114311_FBgn0010280_+	AAGGTGAAT	CGCCTCCCCTTGCATTGCAGTTC	6.38	8.55	169
3L_202430_202488_FBgn0025592_-	Gk1	0.01	0.02	0.13	0.13	8.67	0.115	0.001885	0.01	0.01	0.14	0.12	13	0.12	0.006873	30.51	13	8.67	0.12	3L_202430_202488_FBgn0025592_-	CTGGTTAGT	ATGCTTCAAAAATGCTTTAGGGA	6.32	5	58
3L_21566600_21566661_FBgn0037101_+	CG7634	0.01	0	0.12	0.13	25	0.12	0.003454	0.04	0.02	0.09	0.11	3.33	0.07	0.038476	38.71	25	3.33	0.12	3L_21566600_21566661_FBgn0037101_+	CTGGTGAGT	TCCCTAATTGTTTATTTCAGAAA	10.1	8.6	61
3L_5932318_5932405_FBgn0002638_-	Rcc1	0.11	0.09	0.23	0.21	2.2	0.12	0.013606	0.12	0.11	0.21	0.19	1.74	0.085	0.016865	44.32	2.2	1.74	0.12	3L_5932318_5932405_FBgn0002638_-	ATTGTGAGT	CACAAACGCACTATTTCCAGTTT	7.35	3.9	87
3R_20014019_20014287_FBgn0038762_+	--	0.01	0.01	0.08	0.1	9	0.08	0.015268	0.25	0.23	0.35	0.37	1.5	0.12	0.013606	36.06	9	1.5	0.12	3R_20014019_20014287_FBgn0038762_+	CAGGTACAG	TCGGACTTAATCTCCTCCAGATA	8.68	7.1	268
3R_20046082_20046138_FBgn0064119_+	CG33934	0.02	0.02	0.12	0.14	6.5	0.11	0.008163	0.04	0.03	0.16	0.15	4.43	0.12	0.003454	42.11	6.5	4.43	0.12	3R_20046082_20046138_FBgn0064119_+	TTGGCAAGT	TATCTTATTCCTAACCTCAGGCA	2.72	6.44	56
3R_20046082_20046138_FBgn0260466_+	Indy-2	0.02	0.02	0.12	0.14	6.5	0.11	0.008163	0.04	0.03	0.16	0.15	4.43	0.12	0.003454	42.11	6.5	4.43	0.12	3R_20046082_20046138_FBgn0260466_+	TTGGCAAGT	TATCTTATTCCTAACCTCAGGCA	2.72	6.44	56
3R_20501584_20501638_FBgn0038797_-	Dic2	0.04	0.02	0.14	0.16	5	0.12	0.013606	0.01	0	0.11	0.13	24	0.115	0.00932	25.45	24	5	0.12	3R_20501584_20501638_FBgn0038797_-	GGAGTGAGT	TGCTAATTATGATAATGTAGGAT	6.05	3.42	54
3R_22709903_22709960_FBgn0039010_-	CG4907	0.03	0.01	0.13	0.15	7	0.12	0.013606	0.01	0	0.12	0.1	22	0.105	0.011149	37.93	22	7	0.12	3R_22709903_22709960_FBgn0039010_-	TAAGTGAGT	GAATCCCCCGTATATTTTAGGTC	6.43	8.62	57
3R_25686867_25686981_FBgn0039360_-	CLS	0.09	0.1	0.21	0.22	2.26	0.12	0.003454	0.05	0.06	0.16	0.18	3.09	0.115	0.00932	43.48	3.09	2.26	0.12	3R_25686867_25686981_FBgn0039360_-	ATGGTGCGT	GGCATTTTGTGTGATTACAGTGC	8.27	3.26	114
3R_27165371_27165431_FBgn0085322_-	CG34293	0.03	0.01	0.13	0.15	7	0.12	0.013606	0.02	0	0.11	0.13	12	0.11	0.01613	45.9	12	7	0.12	3R_27165371_27165431_FBgn0085322_-	TCAGTGAGT	GATTATCTGCCCTCAATCAGATG	7.68	6.51	60
3R_30727155_30727214_FBgn0039797_+	eIF4H2	0.01	0.01	0.14	0.12	13	0.12	0.006873	0.02	0.01	0.14	0.13	9	0.12	0.003454	41.67	13	9	0.12	3R_30727155_30727214_FBgn0039797_+	CCGGTAAGA	AGTACACATTCATTTTCCAGATC	10.1	7.82	59
3R_31586026_31586082_FBgn0003268_+	rod	0	0	0.1	0.14	NA	0.12	0.026671	0	0	0.08	0.05	NA	0.065	0.049346	29.82	0	0	0.12	3R_31586026_31586082_FBgn0003268_+	GACGTAAGC	TATCTTTGCAAATCGTTTAGATC	7.1	4.86	56
3R_31590846_31590898_FBgn0039855_+	CG1638	0.02	0.01	0.14	0.12	8.67	0.115	0.00932	0.03	0.01	0.15	0.13	7	0.12	0.013606	39.62	8.67	7	0.12	3R_31590846_31590898_FBgn0039855_+	AGAGTAAGT	TGTCCAGATATCCCTTTTAGTCA	9.35	4.13	52
3R_4468007_4468065_FBgn0051523_-	CG31523	0.01	0	0.11	0.13	24	0.115	0.00932	0.01	0	0.11	0.14	25	0.12	0.016922	44.07	25	24	0.12	3R_4468007_4468065_FBgn0051523_-	CGGGTAAAT	AACTCTATTCCACCGTCTAGATG	6.15	4.4	58
3R_5604376_5604440_FBgn0261004_-	asl	0.02	0.01	0.15	0.12	9	0.12	0.016922	0.02	0.01	0.14	0.11	8.33	0.11	0.020042	32.31	9	8.33	0.12	3R_5604376_5604440_FBgn0261004_-	AAGGTAAGC	TATATCACCACGGTTTTTAGGCG	10.22	3.55	64
3R_6443226_6443438_FBgn0264495_+	gpp	0.31	0.33	0.4	0.42	1.28	0.09	0.023813	0.04	0.01	0.14	0.15	5.8	0.12	0.016922	31.92	5.8	1.28	0.12	3R_6443226_6443438_FBgn0264495_+	AAGGTAAAT	CATATTTTGTATATCTGTAGGTC	8.88	8.8	212
3R_9063341_9063405_FBgn0037660_-	beag	0	0	0.14	0.1	NA	0.12	0.026671	0	0.01	0.1	0.12	22	0.105	0.011149	29.23	22	22	0.12	3R_9063341_9063405_FBgn0037660_-	CAGGTATGT	TATTTTTCTTTGCCATTTAGACA	9.8	6.54	64
X_16594044_16594105_FBgn0267384_+	Ubc7	0.01	0	0.13	0.12	25	0.12	0.003454	0.01	0	0.11	0.14	25	0.12	0.016922	56.45	25	25	0.12	X_16594044_16594105_FBgn0267384_+	AACGTGAGT	ACCGCTCCGATCATCTCCAGAGT	9.54	6.77	61
X_17127902_17127998_FBgn0260748_+	CG5004	0	0.02	0.09	0.11	10	0.09	0.023813	0.03	0.02	0.14	0.15	5.8	0.12	0.003454	35.05	10	5.8	0.12	X_17127902_17127998_FBgn0260748_+	GAGGTACAT	AGAAACTCCTTCCCTTTCAGTTG	6.75	7.6	96
X_2145415_2145489_FBgn0004654_+	Pgd	0	0	0.11	0.09	NA	0.1	0.009852	0.03	0.02	0.14	0.15	5.8	0.12	0.003454	50.67	5.8	5.8	0.12	X_2145415_2145489_FBgn0004654_+	CGGGTGAGT	CATTTCCGGATTTCTTCCAGACA	9.89	7.22	74
X_3955973_3956048_FBgn0029688_-	lva	0.02	0	0.11	0.08	9.5	0.085	0.042159	0.01	0	0.14	0.11	25	0.12	0.016922	47.37	25	9.5	0.12	X_3955973_3956048_FBgn0029688_-	TCTGTGAGT	ACTTCAATTCAAATTTACAGCTC	7	6.55	75
X_9688765_9688828_FBgn0261522_+	CR42657	0	0	0.1	0.14	NA	0.12	0.026671	0.01	0.02	0.11	0.15	8.67	0.115	0.030666	35.94	8.67	8.67	0.12	X_9688765_9688828_FBgn0261522_+	TTGGTAAGC	TGTATTTCCACCGACTAAAGCAA	8.72	0.11	63
Y_3327853_3327916_FBgn0267492_+	Mst77Y-7	0.01	0.01	0.14	0.12	13	0.12	0.006873	0.05	0.03	0.17	0.13	3.75	0.11	0.038926	35.94	13	3.75	0.12	Y_3327853_3327916_FBgn0267492_+	GCGGTAAAT	ATCGTAATGCACTTCCGCAGGAA	6.76	6.16	63
2L_10730383_10730439_FBgn0032291_+	CG17118	0	0.01	0.11	0.13	24	0.115	0.00932	0	0	0.08	0.09	NA	0.085	0.003442	47.37	24	24	0.115	2L_10730383_10730439_FBgn0032291_+	TATGTGAGT	AGAAAGCATCCTTGTAACAGACC	5.56	1.57	56
2L_12430694_12430746_FBgn0032431_-	CG5435	0.15	0.11	0.24	0.25	1.88	0.115	0.030666	0.01	0	0.1	0.09	19	0.09	0.006116	45.28	19	1.88	0.115	2L_12430694_12430746_FBgn0032431_-	ATGGTAAGC	TGACTATTGTGTGCTCTCAGGCA	9.26	8.83	52
2L_21668237_21668292_FBgn0032957_-	CG2225	0	0	0.14	0.09	NA	0.115	0.044153	0	0	0.12	0.08	NA	0.1	0.03775	33.93	0	0	0.115	2L_21668237_21668292_FBgn0032957_-	AGGGTGAGT	TAATAACAATGTACCGGCAGCTG	9.25	3.97	55
2L_9962678_9962734_FBgn0032172_-	CG5850	0	0	0.09	0.12	NA	0.105	0.019804	0	0	0.09	0.14	NA	0.115	0.044153	43.86	0	0	0.115	2L_9962678_9962734_FBgn0032172_-	TGTGTGAGT	CTCTAATCGGAATTTCGTAGCAT	5.84	1.12	56
2R_11968232_11968283_FBgn0033669_-	PI31	0.01	0.01	0.12	0.13	12.5	0.115	0.001885	0.01	0	0.11	0.12	23	0.11	0.004107	38.46	23	12.5	0.115	2R_11968232_11968283_FBgn0033669_-	GATGTGAGT	AATCATCTGGAATTCCATAGAAA	7.77	4.6	51
2R_13130564_13130620_FBgn0033794_-	CG13326	0.03	0.01	0.15	0.12	6.75	0.115	0.023704	0.02	0.01	0.15	0.1	8.33	0.11	0.049745	40.35	8.33	6.75	0.115	2R_13130564_13130620_FBgn0033794_-	AGTGTAAGA	GAACCCTTCGTCTATCCCAGTTT	4.57	6.13	56
2R_14936491_14936546_FBgn0033984_+	Lap1	0	0	0.1	0.13	NA	0.115	0.016591	0	0	0.09	0.14	NA	0.115	0.044153	37.5	0	0	0.115	2R_14936491_14936546_FBgn0033984_+	ATCGTGAGG	AATACCACTTATTCCATTAGTTA	3.45	2.92	55
2R_16027057_16027134_FBgn0034068_-	casp	0	0	0.12	0.11	NA	0.115	0.001885	0	0	0.11	0.11	NA	0.11	0	43.59	0	0	0.115	2R_16027057_16027134_FBgn0034068_-	TTGGTAAGG	CCAATACATATCTCTATTAGAAC	8.92	3.73	77
2R_19946379_19946429_FBgn0261581_-	CG42691	0.01	0.02	0.11	0.12	7.67	0.1	0.004963	0.02	0.02	0.14	0.13	6.75	0.115	0.001885	21.57	7.67	6.75	0.115	2R_19946379_19946429_FBgn0261581_-	AAGGCAAGT	GTAAATTTTTCTAATTGTAGAAA	3.24	5.58	50
2R_21187048_21187102_FBgn0003891_+	tud	0.01	0.01	0.13	0.1	11.5	0.105	0.019804	0.01	0.02	0.13	0.13	8.67	0.115	0.001885	25.45	11.5	8.67	0.115	2R_21187048_21187102_FBgn0003891_+	TGCGTGAGT	ATTTGTGATTACTATTTCAGGCG	7.55	6.72	54
2R_21291860_21291926_FBgn0050392_-	CG30392	0.05	0.03	0.13	0.16	3.63	0.105	0.028236	0.04	0.03	0.15	0.15	4.29	0.115	0.001885	35.82	4.29	3.63	0.115	2R_21291860_21291926_FBgn0050392_-	GAAGTAAAC	GGGCTTTCGGTGTTCATTAGGTT	0.76	5.87	66
2R_22932307_22932363_FBgn0034800_-	CG3788	0.01	0.01	0.13	0.12	12.5	0.115	0.001885	0.01	0.01	0.12	0.11	11.5	0.105	0.00226	28.07	12.5	11.5	0.115	2R_22932307_22932363_FBgn0034800_-	CAAGTGAGT	CCAACTAAAATCATACTAAGATC	9.1	-0.76	56
2R_24201651_24201709_FBgn0034989_+	CG3356	0	0	0.13	0.1	NA	0.115	0.016591	0.02	0	0.12	0.09	10.5	0.095	0.034176	32.2	10.5	10.5	0.115	2R_24201651_24201709_FBgn0034989_+	AAGGTGGGT	TCTTTGAATTTCCATAATAGGAC	8.23	7.84	58
2R_8126870_8126923_FBgn0033265_-	coil	0.02	0.04	0.14	0.15	4.83	0.115	0.00932	0	0.01	0.14	0.09	23	0.11	0.049745	38.89	23	4.83	0.115	2R_8126870_8126923_FBgn0033265_-	CAAGTAGGT	AGCATATTCATCCCTTGCAGAGC	7.33	8.02	53
3L_13329236_13329287_FBgn0040814_+	CG14113	0.01	0.01	0.12	0.13	12.5	0.115	0.001885	0.01	0.01	0.09	0.11	10	0.09	0.012122	26.92	12.5	10	0.115	3L_13329236_13329287_FBgn0040814_+	GAGGTTTGT	CTTTTCATTTTGAATTAAAGGTA	6.36	7.29	51
3L_15095186_15095254_FBgn0027088_+	GlyRS	0.04	0.01	0.14	0.14	5.6	0.115	0.016591	0.04	0.04	0.15	0.13	3.5	0.1	0.009852	36.23	5.6	3.5	0.115	3L_15095186_15095254_FBgn0027088_+	AAGGTATTG	TTCGGCTGAAAAAATAAAAGCCT	7.76	-3.88	68
3L_15095186_15095273_FBgn0027088_+	GlyRS	0.04	0.01	0.14	0.14	5.6	0.115	0.016591	0.09	0.06	0.17	0.18	2.33	0.1	0.0241	37.5	5.6	2.33	0.115	3L_15095186_15095273_FBgn0027088_+	AAGGTATTG	GCCTCTTTATGTCATTGCAGTTG	7.76	7.08	87
3L_19546717_19546772_FBgn0260461_+	Rcd7	0	0	0.11	0.12	NA	0.115	0.001885	0.01	0.01	0.11	0.12	11.5	0.105	0.00226	28.57	11.5	11.5	0.115	3L_19546717_19546772_FBgn0260461_+	CAGGTAAGT	CTAATTGAAATCATCAAAAGATC	10.86	0.75	55
3L_4869074_4870143_FBgn0035581_+	Dnah3	0.02	0	0.14	0.11	12.5	0.115	0.023704	0.02	0.01	0.14	0.12	8.67	0.115	0.00932	42.9	12.5	8.67	0.115	3L_4869074_4870143_FBgn0035581_+	CCAGTGAGT	GGTCTCACTCCCATCCGCAGGCG	8.28	8.36	1069
3L_8297473_8297534_FBgn0015793_+	Rab19	0.01	0.01	0.12	0.12	12	0.11	0	0.01	0.01	0.12	0.13	12.5	0.115	0.001885	50	12.5	12	0.115	3L_8297473_8297534_FBgn0015793_+	AAGGTGCAT	ATATTCTGCCCCTCTTCCAGCTA	4.62	8.84	61
3R_11819645_11819710_FBgn0019624_+	COX5A	0.11	0.12	0.23	0.23	2	0.115	0.001885	0.12	0.14	0.2	0.2	1.54	0.07	0.019804	34.85	2	1.54	0.115	3R_11819645_11819710_FBgn0019624_+	AAAGTGAGT	TTTACTGTTTTTAACGGCAGCAT	8.4	6.15	65
3R_12984048_12984110_FBgn0038100_+	Paip2	0	0	0.12	0.11	NA	0.115	0.001885	0.01	0	0.11	0.11	22	0.105	0.00226	38.1	22	22	0.115	3R_12984048_12984110_FBgn0038100_+	CAAGTGAGT	TTTGCAATCGCTTATTTCAGGAC	9.1	7.19	62
3R_14642159_14642235_FBgn0038248_-	CG7886	0.02	0.04	0.12	0.11	3.83	0.085	0.016865	0.06	0.07	0.19	0.17	2.77	0.115	0.00932	49.35	3.83	2.77	0.115	3R_14642159_14642235_FBgn0038248_-	AAGGTGAGT	ATTACATCATATCCTAGCAGGCG	10.47	3.96	76
3R_18851667_18851723_FBgn0051226_-	CG31226	0.52	0.52	0.63	0.64	1.22	0.115	0.001885	0	0	0.09	0.1	NA	0.095	0.002759	35.09	1.22	1.22	0.115	3R_18851667_18851723_FBgn0051226_-	CAAGTAACG	CTTATGTCCAAGTTTTGCAGGAC	3.7	2.42	56
3R_27236167_27236223_FBgn0051068_+	CG31068	0	0	0.07	0.08	NA	0.075	0.004415	0	0	0.11	0.12	NA	0.115	0.001885	36.84	0	0	0.115	3R_27236167_27236223_FBgn0051068_+	GAGGTGAGT	TGATCTTGACGGTTTTTCAGTAT	10.03	4.95	56
4_855636_855685_FBgn0039936_-	Gyf	0.01	0.02	0.1	0.11	7	0.09	0.006116	0.02	0.02	0.12	0.15	6.75	0.115	0.016591	20	7	6.75	0.115	4_855636_855685_FBgn0039936_-	AAGGTACTT	TTAATTAAACCATTTTTAAGAAC	8.4	3.29	49
X_16084208_16084262_FBgn0030725_+	CG8958	0.02	0.02	0.13	0.14	6.75	0.115	0.001885	0.03	0.02	0.11	0.16	5.4	0.11	0.049745	34.55	6.75	5.4	0.115	X_16084208_16084262_FBgn0030725_+	CAGGTTAGT	CGTTTTTCGTACATCGATAGATA	8.02	5.38	54
X_17159107_17159170_FBgn0028974_-	xmas-2	0.05	0.03	0.17	0.14	3.88	0.115	0.023704	0	0.04	0.15	0.12	6.75	0.115	0.044153	43.75	6.75	3.88	0.115	X_17159107_17159170_FBgn0028974_-	ATTGTGAGT	AGTTCCATACGAATCCCCAGATG	7.35	3.67	63
X_19611944_19612011_FBgn0031038_+	Tyler	0	0.01	0.1	0.14	24	0.115	0.030666	0.01	0.02	0.09	0.11	6.67	0.085	0.016865	47.06	24	6.67	0.115	X_19611944_19612011_FBgn0031038_+	TGGGTGAGT	CCTACTACACTCGGCCGTAGTGA	8.73	2.63	67
X_19611944_19612011_FBgn0031039_+	Shawn	0	0.01	0.1	0.14	24	0.115	0.030666	0.01	0.02	0.09	0.11	6.67	0.085	0.016865	47.06	24	6.67	0.115	X_19611944_19612011_FBgn0031039_+	TGGGTGAGT	CCTACTACACTCGGCCGTAGTGA	8.73	2.63	67
X_22471288_22471348_FBgn0031188_-	CG14613	0.01	0.01	0.11	0.14	12.5	0.115	0.016591	0.01	0.01	0.11	0.12	11.5	0.105	0.00226	50.82	12.5	11.5	0.115	X_22471288_22471348_FBgn0031188_-	GAGGTGCGT	ATGAATCCCTCCCATTGCAGTGG	8.42	7.85	60
2L_10212403_10212467_FBgn0032194_+	CG4901	0	0	0.06	0.05	NA	0.055	0.008163	0.02	0	0.1	0.14	12	0.11	0.038926	43.08	12	12	0.11	2L_10212403_10212467_FBgn0032194_+	AAGGTGAGT	TAAGTTGCTCGCTATTTCAGATT	10.47	7.93	64
2L_11096702_11096764_FBgn0032340_-	--	0	0	0.1	0.12	NA	0.11	0.008163	0	0.03	0.11	0.11	7.33	0.095	0.024036	28.57	7.33	7.33	0.11	2L_11096702_11096764_FBgn0032340_-	AAGGTACGT	GTTTTTTTTTCATTACTTAGCAA	10.75	5.31	62
2L_14875451_14875505_FBgn0032554_-	CG15278	0.01	0.01	0.1	0.14	12	0.11	0.031504	0.01	0.01	0.1	0.12	11	0.1	0.009852	47.27	12	11	0.11	2L_14875451_14875505_FBgn0032554_-	TGGGTAAGT	AACCTCTTTCTTTAATTCAGCCG	10.24	5.44	54
2L_5535304_5535364_FBgn0051989_+	Cap-D3	0	0	0.1	0.12	NA	0.11	0.008163	0	0	0.1	0.11	NA	0.105	0.00226	34.43	0	0	0.11	2L_5535304_5535364_FBgn0051989_+	CCAGTATGT	ATGTTCAAATTCCTTTGCAGCTC	5.8	9.18	60
2L_9789733_9789790_FBgn0042174_-	CR18854	0.01	0.02	0.1	0.09	6.33	0.08	0.007722	0.1	0.11	0.21	0.22	2.05	0.11	0.004107	20.69	6.33	2.05	0.11	2L_9789733_9789790_FBgn0042174_-	CAGGTGAGA	AGAAAAATCAAAGCACACAGATA	9.22	-6.65	57
2R_14603290_14603347_FBgn0003742_-	tra2	0.04	0.04	0.12	0.13	3.12	0.085	0.003442	0.02	0.03	0.12	0.15	5.4	0.11	0.020042	44.83	5.4	3.12	0.11	2R_14603290_14603347_FBgn0003742_-	CGCGTAAGC	AAAGATCTTCGGCGTTTCAGGAA	5.72	5.42	57
2R_17106058_17106116_FBgn0050456_+	CG30456	0	0	0.11	0.11	NA	0.11	0	0	0	0.09	0.11	NA	0.1	0.009852	18.64	0	0	0.11	2R_17106058_17106116_FBgn0050456_+	GATGTGAGT	TTTTATATATTAATCTTTAGCAA	7.77	6.33	58
2R_17543369_17543428_FBgn0263113_+	Cc2d2a	0.01	0.01	0.1	0.14	12	0.11	0.031504	0.05	0	0.13	0.14	5.4	0.11	0.049745	43.33	12	5.4	0.11	2R_17543369_17543428_FBgn0263113_+	TCGGTGGGT	CTAATGGCTTCAGTCCACAGAGC	6.9	2.21	59
2R_18167722_18167772_FBgn0260392_+	CG42518	0	0	0.11	0.11	NA	0.11	0	0.01	0.01	0.12	0.12	12	0.11	0	43.14	12	12	0.11	2R_18167722_18167772_FBgn0260392_+	AAGGTGAGT	GCTATATACTTGATTTGTAGATC	10.47	5.01	50
2R_18167722_18167772_FBgn0260401_+	MED9	0	0	0.11	0.11	NA	0.11	0	0.01	0.01	0.12	0.12	12	0.11	0	43.14	12	12	0.11	2R_18167722_18167772_FBgn0260401_+	AAGGTGAGT	GCTATATACTTGATTTGTAGATC	10.47	5.01	50
2R_19595749_19595803_FBgn0034459_+	CG16716	0.01	0	0.11	0.12	23	0.11	0.004107	0.02	0.01	0.11	0.12	7.67	0.1	0.004963	23.64	23	7.67	0.11	2R_19595749_19595803_FBgn0034459_+	CAGGTAAAA	CAATGTTTATCAATGTTTAGGCA	8.59	4.6	54
2R_21170239_21170300_FBgn0261067_-	LSm1	0.02	0.03	0.11	0.14	5	0.1	0.0241	0.01	0.02	0.13	0.12	8.33	0.11	0.004107	30.65	8.33	5	0.11	2R_21170239_21170300_FBgn0261067_-	ATAGTAAGC	CCTTTAAATATGCGTAAAAGGAC	5.26	1.65	61
2R_22884803_22884907_FBgn0034792_-	YME1L	0.05	0.05	0.16	0.16	3.2	0.11	0	0.06	0.06	0.15	0.15	2.5	0.09	0	33.33	3.2	2.5	0.11	2R_22884803_22884907_FBgn0034792_-	AAGGTACGA	TTCTAGTAATTGTCACGCAGACT	9.78	2.43	104
2R_23938604_23938658_FBgn0034933_-	CG3735	0.01	0	0.11	0.12	23	0.11	0.004107	0.01	0	0.09	0.09	18	0.085	0.003442	40	23	18	0.11	2R_23938604_23938658_FBgn0034933_-	ATGGTAAGT	CCATTAAATGTCCTTCACAGATC	11.01	8.98	54
2R_25129537_25129592_FBgn0050430_+	CG30430	0	0	0.11	0.11	NA	0.11	0	0	0	0.1	0.11	NA	0.105	0.00226	23.21	0	0	0.11	2R_25129537_25129592_FBgn0050430_+	TAAGTAAGC	TTTAACGCATATGTGTTTAGAAC	5.66	5.31	55
2R_4131269_4131321_FBgn0262115_+	CG17683	0.07	0.08	0.16	0.19	2.33	0.1	0.0241	0.06	0.06	0.17	0.17	2.83	0.11	0	37.74	2.83	2.33	0.11	2R_4131269_4131321_FBgn0262115_+	GAGGTAAGT	ATGAAATGGTTTCGTTACAGAGT	11.08	5.97	52
2R_9133348_9133598_FBgn0033382_+	Hydr1	0.21	0.21	0.3	0.34	1.52	0.11	0.031504	0.06	0.07	0.13	0.12	1.92	0.06	0.013606	50.6	1.92	1.52	0.11	2R_9133348_9133598_FBgn0033382_+	GCTGTGAGT	TGGCTTGTTCGTTTTTTCAGCTC	7.39	9.27	250
2R_9970208_9970271_FBgn0027619_+	eIF3j	0	0	0.1	0.11	NA	0.105	0.00226	0	0	0.1	0.12	NA	0.11	0.008163	40.62	0	0	0.11	2R_9970208_9970271_FBgn0027619_+	ATCGTGAGT	TGATTTCGCACCTTATCTAGTGA	8.88	3.96	63
3L_21544269_21544325_FBgn0037098_-	Wnk	0	0.01	0.11	0.11	22	0.105	0.00226	0.01	0.01	0.13	0.11	12	0.11	0.008163	36.84	22	12	0.11	3L_21544269_21544325_FBgn0037098_-	AATGTATGT	AACAGTCCTTTCTTTTCCAGCTA	5.87	8.98	56
3L_4217595_4217656_FBgn0263110_+	CG43367	0	0	0.1	0.12	NA	0.11	0.008163	0	0	0.12	0.1	NA	0.11	0.008163	35.48	0	0	0.11	3L_4217595_4217656_FBgn0263110_+	TGCGTAAGT	CAAACGCATTTCTACCGCAGATA	9.73	6.93	61
3L_8910472_8910523_FBgn0266757_-	mfr	0.01	0	0.13	0.1	23	0.11	0.020042	0.01	0	0.12	0.11	23	0.11	0.004107	36.54	23	23	0.11	3L_8910472_8910523_FBgn0266757_-	ATGGTACGT	TAATCCATAATAAATGGCAGCGT	9.89	-0.17	51
3R_11414033_11414090_FBgn0037894_+	Ranbp9	0.01	0.01	0.13	0.11	12	0.11	0.008163	0.04	0.03	0.13	0.12	3.57	0.09	0.006116	36.21	12	3.57	0.11	3R_11414033_11414090_FBgn0037894_+	CTGGTGAGC	GGCATAATATATTTTTGTAGGCT	8.05	5.45	57
3R_24060312_24060374_FBgn0040283_+	SMC1	0	0	0.1	0.11	NA	0.105	0.00226	0	0	0.11	0.11	NA	0.11	0	34.92	0	0	0.11	3R_24060312_24060374_FBgn0040283_+	CAGGTGGGT	CGATTTTATATGTTCTATAGATC	8.56	7.01	62
X_15084266_15084352_FBgn0030610_-	CG9065	0.01	0	0.11	0.12	23	0.11	0.004107	0.01	0.01	0.1	0.12	11	0.1	0.009852	44.83	23	11	0.11	X_15084266_15084352_FBgn0030610_-	CTGGTGAGT	CGATACCAAATCCCCACCAGCAT	10.1	0.91	86
X_15987990_15988067_FBgn0030719_-	eIF5	0.01	0.01	0.1	0.14	12	0.11	0.031504	0.01	0.01	0.09	0.13	11	0.1	0.03775	37.18	12	11	0.11	X_15987990_15988067_FBgn0030719_-	AAGGTACGT	TTACTACTCCACCCCGGTAGGAG	10.75	5.31	77
X_473706_473763_FBgn0266572_-	ebo	0.06	0.05	0.13	0.15	2.55	0.085	0.016865	0.06	0.06	0.17	0.17	2.83	0.11	0	43.1	2.83	2.55	0.11	X_473706_473763_FBgn0266572_-	CCTGTAAGT	ATGCTTTCTTGATCCTTCAGATA	7.52	9.52	57
X_9083166_9083240_FBgn0052707_+	APC4	0.07	0.05	0.15	0.19	2.83	0.11	0.038926	0.05	0.05	0.13	0.16	2.9	0.095	0.024036	48	2.9	2.83	0.11	X_9083166_9083240_FBgn0052707_+	AGGGTGAGC	TATCCCAATCATGTGGATAGGTG	7.75	4.8	74
2L_15852701_15852752_FBgn0028903_+	CG13243	0.01	0.01	0.1	0.13	11.5	0.105	0.019804	0.03	0.04	0.11	0.13	3.43	0.085	0.016865	34.62	11.5	3.43	0.105	2L_15852701_15852752_FBgn0028903_+	TGGGTAAGA	AAGACAACACCTCCCTGCAGATG	8.91	5.43	51
2L_20754751_20754808_FBgn0032883_-	Rhau	0.01	0	0.12	0.1	22	0.105	0.011149	0.02	0.02	0.14	0.11	6.25	0.105	0.019804	34.48	22	6.25	0.105	2L_20754751_20754808_FBgn0032883_-	CAAGTTAGT	ACGTTTTTATTTCCGCACAGAGC	4.22	7.92	57
2L_3030948_3030999_FBgn0031495_+	GABPI	0.09	0.07	0.18	0.15	2.06	0.085	0.042159	0.07	0.07	0.17	0.18	2.5	0.105	0.00226	30.77	2.5	2.06	0.105	2L_3030948_3030999_FBgn0031495_+	AAGGTAGGA	TAAAATTAAATTTACCACAGACT	9.45	5.12	51
2L_884847_884907_FBgn0031292_-	CG15824	0	0	0.1	0.08	NA	0.09	0.012122	0	0.01	0.12	0.1	22	0.105	0.011149	39.34	22	22	0.105	2L_884847_884907_FBgn0031292_-	AATGTAAGA	CCTTTTTCGCCCTCCCTCAGACT	5.55	9.64	60
2L_8942453_8942508_FBgn0032077_-	CG9515	0	0	0.12	0.09	NA	0.105	0.019804	0	0	0.11	0.09	NA	0.1	0.009852	30.36	0	0	0.105	2L_8942453_8942508_FBgn0032077_-	CCTGTAAGC	TTTTGACTTTAAAATTGCAGAGA	3.69	6.33	55
2R_11989511_11989566_FBgn0033673_+	CG8298	0.01	0.01	0.11	0.11	11	0.1	0	0.02	0.01	0.12	0.12	8	0.105	0.00226	42.86	11	8	0.105	2R_11989511_11989566_FBgn0033673_+	GAGGTTGTT	TAATCTGACTACATTTGCAGACC	0.25	6.08	55
2R_18631631_18631749_FBgn0034368_-	CG5482	0.06	0.06	0.18	0.15	2.75	0.105	0.019804	0.08	0.1	0.19	0.19	2.11	0.1	0.009852	48.74	2.75	2.11	0.105	2R_18631631_18631749_FBgn0034368_-	GCTGTAAGT	TTTCGCCTCGCCAAGCATAGGTA	8.56	2.12	118
2R_18631636_18631749_FBgn0034368_-	CG5482	0.06	0.06	0.18	0.15	2.75	0.105	0.019804	0.07	0.09	0.17	0.17	2.12	0.09	0.012122	49.12	2.75	2.12	0.105	2R_18631636_18631749_FBgn0034368_-	GCTGTAAGT	CATACTTTCGCCTCGCCAAGCAT	8.56	0.8	113
2R_22711784_22711845_FBgn0050275_+	CG30275	0	0	0.1	0.08	NA	0.09	0.012122	0.08	0.08	0.18	0.19	2.31	0.105	0.00226	32.26	2.31	2.31	0.105	2R_22711784_22711845_FBgn0050275_+	AAGGTGAAA	AGATCCCCAATTATTTTTAGATC	4.51	4.72	61
2R_9586232_9586289_FBgn0033429_-	CG12929	0.02	0.02	0.12	0.09	5.25	0.085	0.029759	0	0.02	0.12	0.11	11.5	0.105	0.011149	43.1	11.5	5.25	0.105	2R_9586232_9586289_FBgn0033429_-	GAAGTAAGC	TTTACCAACTGCTCCCGCAGAAG	6.95	7.83	57
3L_12205892_12205943_FBgn0036266_-	CG5626	0.02	0.01	0.13	0.11	8	0.105	0.011149	0.02	0.03	0.12	0.1	4.4	0.085	0.016865	28.85	8	4.4	0.105	3L_12205892_12205943_FBgn0036266_-	AAGGTAATT	TTAAAATCAATTAATTTCAGTGC	8.83	4.62	51
3L_15162134_15162256_FBgn0036488_+	CG6878	0.01	0	0.1	0.12	22	0.105	0.011149	0.02	0.03	0.12	0.14	5.2	0.105	0.011149	46.34	22	5.2	0.105	3L_15162134_15162256_FBgn0036488_+	CAGGTTAGT	CACATTGAAATACACTTTAGATA	8.02	3.58	122
3L_17761847_17761898_FBgn0052181_+	CG32181	0.01	0.01	0.08	0.11	9.5	0.085	0.029759	0	0	0.1	0.11	NA	0.105	0.00226	34.62	9.5	9.5	0.105	3L_17761847_17761898_FBgn0052181_+	ACTGTAAGT	AGTAATCCTTGTTTTGATAGCCA	8.59	3.11	51
3L_17794773_17794827_FBgn0261998_-	CG42816	0.01	0.01	0.11	0.12	11.5	0.105	0.00226	0.02	0.02	0.1	0.09	4.75	0.075	0.004415	23.64	11.5	4.75	0.105	3L_17794773_17794827_FBgn0261998_-	AAGGTAATA	ATTTTAAATTTTGTGAAAAGGTT	8.49	5.36	54
3L_21828005_21828070_FBgn0052448_-	CG32448	0.05	0.04	0.15	0.15	3.33	0.105	0.00226	0.03	0.04	0.14	0.14	4	0.105	0.00226	33.33	4	3.33	0.105	3L_21828005_21828070_FBgn0052448_-	CCGGTGCGG	TATACCATATTGGCTTTCAGAAC	8.19	7.24	65
3L_4364746_4364811_FBgn0035534_+	mRpS6	0.02	0	0.13	0.1	11.5	0.105	0.028236	0.03	0	0.12	0.11	7.67	0.1	0.0241	43.94	11.5	7.67	0.105	3L_4364746_4364811_FBgn0035534_+	CGCGTGAGT	GAATTGTACACCGCCCGCAGCCC	8.4	4.35	65
3R_15950453_15950505_FBgn0051088_-	CG31088	0	0.01	0.12	0.1	22	0.105	0.011149	0.01	0.02	0.11	0.11	7.33	0.095	0.002759	26.42	22	7.33	0.105	3R_15950453_15950505_FBgn0051088_-	ACGGTAAGT	ATTGTCAACATCTATTTTAGTGC	11.81	6.43	52
3R_18851667_18851718_FBgn0051226_-	CG31226	0	0	0.1	0.11	NA	0.105	0.00226	0	0	0.09	0.1	NA	0.095	0.002759	34.62	0	0	0.105	3R_18851667_18851718_FBgn0051226_-	AACGTAATT	CTTATGTCCAAGTTTTGCAGGAC	5.05	2.42	51
3R_21883172_21883215_FBgn0051465_+	CG31465	0.01	0.01	0.13	0.1	11.5	0.105	0.019804	0.01	0.01	0.12	0.1	11	0.1	0.009852	31.82	11.5	11	0.105	3R_21883172_21883215_FBgn0051465_+	ATGGTAAGA	ATTCATGTATGTATATAAAGTTT	9.48	1.2	43
3R_25334393_25334447_FBgn0039329_-	CG10669	0	0	0.1	0.08	NA	0.09	0.012122	0	0	0.12	0.09	NA	0.105	0.019804	29.09	0	0	0.105	3R_25334393_25334447_FBgn0039329_-	GGAGTATGA	TAAAAGTTTTTTATTGATAGTTA	0.37	2.99	54
3R_25776036_25776110_FBgn0039368_-	CG17196	1.1	1.1	1.18	1.16	1.06	0.07	0.019804	0.81	0.82	0.93	0.91	1.13	0.105	0.011149	45.33	1.13	1.06	0.105	3R_25776036_25776110_FBgn0039368_-	CTGGTGAGC	ATGATGGTTTTATGTATAAGTTC	8.05	1.71	74
3R_4397641_4397707_FBgn0037242_-	CG9855	0.01	0	0.11	0.11	22	0.105	0.00226	0.02	0.01	0.1	0.11	7	0.09	0.006116	43.28	22	7	0.105	3R_4397641_4397707_FBgn0037242_-	AAAGTAAGC	ACATTGTGTTATACTTTCAGCGA	7.31	8.05	66
3R_7060985_7061039_FBgn0037463_+	djl	0	0	0.09	0.12	NA	0.105	0.019804	0.02	0.02	0.1	0.12	5.5	0.09	0.012122	36.36	5.5	5.5	0.105	3R_7060985_7061039_FBgn0037463_+	AAGGTAAGA	CTTATACTTGTTCGTACTAGAAA	10.57	5.27	54
3R_8341658_8341715_FBgn0004908_+	Arl2	0.03	0.01	0.1	0.12	5.5	0.09	0.023813	0.04	0.02	0.13	0.14	4.5	0.105	0.011149	20.69	5.5	4.5	0.105	3R_8341658_8341715_FBgn0004908_+	GAGGTTCAC	AATATACTTTATATTTAAAGATA	-1.16	4.02	57
3R_9555064_9555124_FBgn0037708_-	CG9386	0	0	0.09	0.12	NA	0.105	0.019804	0	0	0.08	0.07	NA	0.075	0.004415	26.23	0	0	0.105	3R_9555064_9555124_FBgn0037708_-	TGGGTGAGG	TATTATATTCCTAATTACAGATT	6.74	7.16	60
X_10476126_10476182_FBgn0030206_+	CG2889	0.03	0	0.11	0.13	8	0.105	0.028236	0.02	0	0.1	0.13	11.5	0.105	0.028236	43.86	11.5	8	0.105	X_10476126_10476182_FBgn0030206_+	TACGTGAGT	TAGACTTTAAAATCCCATAGCTG	7.77	3.59	56
X_16711581_16711654_FBgn0030780_+	CG13008	0	0	0.1	0.11	NA	0.105	0.00226	0.01	0.01	0.1	0.11	10.5	0.095	0.002759	32.43	10.5	10.5	0.105	X_16711581_16711654_FBgn0030780_+	CGGGTAAGA	TTGGTTACTTGGTTACCTAGTTC	9.84	2.74	73
X_4641653_4641832_FBgn0025612_-	CG3062	0.01	0.01	0.13	0.1	11.5	0.105	0.019804	0.01	0.01	0.12	0.09	10.5	0.095	0.024036	46.67	11.5	10.5	0.105	X_4641653_4641832_FBgn0025612_-	GTGGTGAGT	ACATTCACCTGCAACCGTAGAGC	8.95	5.05	179
X_4920270_4920329_FBgn0029737_+	CG6903	0.01	0	0.1	0.1	20	0.095	0.002759	0.02	0.02	0.12	0.13	6.25	0.105	0.00226	43.33	20	6.25	0.105	X_4920270_4920329_FBgn0029737_+	CGGGTAAAG	TCTCCCATCGATCGCCATAGAAT	6.23	6.67	59
2L_1500046_1500113_FBgn0031343_-	CG18131	0	0	0.1	0.1	NA	0.1	0	0.01	0.01	0.11	0.11	11	0.1	0	42.65	11	11	0.1	2L_1500046_1500113_FBgn0031343_-	AAGGTAGAA	ACCAATTTACCCCTCCTCAGTCA	6.33	5.26	67
2L_15266735_15266795_FBgn0261268_-	Cul3	0.01	0.01	0.09	0.11	10	0.09	0.012122	0.01	0.01	0.1	0.12	11	0.1	0.009852	36.07	11	10	0.1	2L_15266735_15266795_FBgn0261268_-	CAGGTTAGA	TAATATCGAAACTATTTTAGGGT	5.94	6.05	60
2L_18080087_18080146_FBgn0000120_+	Arr1	0	0	0.08	0.12	NA	0.1	0.03775	0.01	0.03	0.12	0.11	5.75	0.095	0.013569	28.33	5.75	5.75	0.1	2L_18080087_18080146_FBgn0000120_+	AAGGTAATA	AGGCAATCAATTATTTACAGCCA	8.49	1.21	59
2L_2300505_2300582_FBgn0051949_+	CG31949	1.07	1.11	1.18	1.18	1.08	0.09	0.046002	1.04	1.04	1.12	1.16	1.1	0.1	0.03775	43.59	1.1	1.08	0.1	2L_2300505_2300582_FBgn0051949_+	ATGGTAAAG	TGTTTCTCAACTGTTTCCAGATC	5.39	8.58	77
2L_4484631_4484691_FBgn0053196_-	dpy	0	0	0.09	0.11	NA	0.1	0.009852	0	0	0.08	0.09	NA	0.085	0.003442	36.07	0	0	0.1	2L_4484631_4484691_FBgn0053196_-	AACGTAAGT	TGTATTCCTTGATCCTCCAGCTG	10.74	8.65	60
2L_6490374_6490438_FBgn0031822_-	Phf5a	0	0	0.1	0.08	NA	0.09	0.012122	0	0	0.12	0.08	NA	0.1	0.03775	40	0	0	0.1	2L_6490374_6490438_FBgn0031822_-	GACGTGAGT	GTCCATTTTGGTTCTTATAGCGC	9.22	7.03	64
2R_13128788_13128859_FBgn0033793_-	CG3955	0.01	0	0.1	0.11	21	0.1	0.004963	0.02	0	0.1	0.11	10.5	0.095	0.013569	50	21	10.5	0.1	2R_13128788_13128859_FBgn0033793_-	ATGGTGAGT	ATGTCATCTTCGATGTCCAGTGA	10.13	3.66	71
2R_13444107_13444174_FBgn0013765_-	cnn	0.02	0.03	0.13	0.12	5	0.1	0.004963	0.01	0.02	0.1	0.09	6.33	0.08	0.007722	51.47	6.33	5	0.1	2R_13444107_13444174_FBgn0013765_-	GAAGTGAGT	AATCCTTCCCCCTTAAAAAGGCC	7.97	6.23	67
2R_13977581_13977644_FBgn0033889_-	CG6701	0.05	0.04	0.16	0.13	3.22	0.1	0.0241	0.05	0.07	0.18	0.14	2.67	0.1	0.046537	29.69	3.22	2.67	0.1	2R_13977581_13977644_FBgn0033889_-	AAGGTAGTC	GAGAGTTTTTTTGTTGGCAGAAT	5.64	3.49	63
2R_14611692_14611780_FBgn0026427_-	Su(var)2-HP2	0.07	0.06	0.16	0.15	2.38	0.09	0.006116	0.03	0.03	0.14	0.12	4.33	0.1	0.009852	28.09	4.33	2.38	0.1	2R_14611692_14611780_FBgn0026427_-	ATGGTTAAT	CATCCCTTCTTTTTATTTAGAAG	1.23	8.15	88
2R_14611692_14616842_FBgn0026427_-	Su(var)2-HP2	0	0	0.05	0.08	NA	0.065	0.049346	0.03	0.03	0.14	0.12	4.33	0.1	0.009852	42.71	4.33	4.33	0.1	2R_14611692_14616842_FBgn0026427_-	CGGGTAAGT	CATCCCTTCTTTTTATTTAGAAG	10.75	8.15	5150
2R_17670329_17670386_FBgn0050109_+	CG30109	0	0	0.1	0.1	NA	0.1	0	0.01	0.01	0.1	0.1	10	0.09	0	44.83	10	10	0.1	2R_17670329_17670386_FBgn0050109_+	AAGGTAAGC	ACCCAATCTTTGACCTTTAGCGC	10.22	5.78	57
2R_9043428_9043485_FBgn0033367_-	PPO2	0	0	0.11	0.09	NA	0.1	0.009852	0	0	0.09	0.09	NA	0.09	0	36.21	0	0	0.1	2R_9043428_9043485_FBgn0033367_-	CTGGTAATA	TAATCCTATTGCTCCCCTAGTAT	4.88	5.37	57
3L_10638495_10638553_FBgn0036090_+	CG8009	0.18	0.21	0.29	0.27	1.44	0.085	0.042159	0.17	0.2	0.29	0.28	1.54	0.1	0.0241	40.68	1.54	1.44	0.1	3L_10638495_10638553_FBgn0036090_+	GCAGTAAGT	ACAATCCGTAATAACCATAGAGC	9.07	3.69	58
3L_16111882_16112331_FBgn0263603_-	Zn72D	0	0.04	0.11	0.13	6	0.1	0.046537	0.14	0.13	0.23	0.23	1.7	0.095	0.002759	44	6	1.7	0.1	3L_16111882_16112331_FBgn0263603_-	CAGGTAATT	TTCGATTTTCGTAATTGCAGCGC	8.55	5.92	449
3L_1766169_1766227_FBgn0013811_-	Dhc62B	0.03	0	0.11	0.1	7	0.09	0.029505	0.04	0.01	0.12	0.13	5	0.1	0.0241	44.07	7	5	0.1	3L_1766169_1766227_FBgn0013811_-	CCCGTAAGA	CCAAGGTTAATCAATTGCAGTGC	5.66	2.31	58
3L_18295542_18295597_FBgn0262998_+	CR43306	0	0	0.11	0.07	NA	0.09	0.046002	0	0	0.1	0.1	NA	0.1	0	21.43	0	0	0.1	3L_18295542_18295597_FBgn0262998_+	TAAGTGAGT	CAATATATTTCCTGATCAAGGCT	6.43	2.24	55
3L_20769686_20769738_FBgn0040634_+	CG4186	0.01	0.02	0.11	0.12	7.67	0.1	0.004963	0.03	0.04	0.12	0.13	3.57	0.09	0.006116	16.98	7.67	3.57	0.1	3L_20769686_20769738_FBgn0040634_+	AAGGTTTGT	AATTATATCTTTACAAATAGGAA	7.81	7.16	52
3L_21269339_21269416_FBgn0037064_-	CG9389	0.01	0.01	0.11	0.11	11	0.1	0	0.01	0.01	0.1	0.12	11	0.1	0.009852	34.62	11	11	0.1	3L_21269339_21269416_FBgn0037064_-	CCAGTAAGT	GTATACTATAACTCATGCAGATT	9.09	4.34	77
3L_896552_896607_FBgn0054056_+	CG34056	0.03	0	0.13	0.1	7.67	0.1	0.042174	0.03	0	0.08	0.08	5.33	0.065	0.049346	32.14	7.67	5.33	0.1	3L_896552_896607_FBgn0054056_+	CACGTAAGT	TCATTTTCACCCAATTTTAGCTT	10.16	8.32	55
3R_10248431_10248489_FBgn0261928_+	CG42795	0	0.01	0.09	0.12	21	0.1	0.0241	0.05	0.06	0.16	0.13	2.64	0.09	0.029505	28.81	21	2.64	0.1	3R_10248431_10248489_FBgn0261928_+	AGGGTAAGT	TATTTAATCATACCTACTAGGAA	10.45	5.45	58
3R_15963546_15963598_FBgn0038388_-	CG4287	0	0	0.08	0.12	NA	0.1	0.03775	0.01	0.03	0.09	0.12	5.25	0.085	0.042159	41.51	5.25	5.25	0.1	3R_15963546_15963598_FBgn0038388_-	TCGGTAAGG	ATAAAGGATTTCATACACAGCTA	10.48	1.31	52
3R_23094322_23094379_FBgn0039049_+	CG6726	0.02	0	0.09	0.1	9.5	0.085	0.016865	0.01	0	0.11	0.1	21	0.1	0.004963	36.21	21	9.5	0.1	3R_23094322_23094379_FBgn0039049_+	GGCGTAAGT	TTCATTTTATACCCCTGCAGAAC	9.39	9.08	57
3R_23094322_23094379_FBgn0039050_+	CG17110	0.02	0	0.09	0.1	9.5	0.085	0.016865	0.01	0	0.11	0.1	21	0.1	0.004963	36.21	21	9.5	0.1	3R_23094322_23094379_FBgn0039050_+	GGCGTAAGT	TTCATTTTATACCCCTGCAGAAC	9.39	9.08	57
3R_23757144_23757196_FBgn0028475_-	Hrd3	0	0	0.09	0.1	NA	0.095	0.002759	0.02	0.01	0.1	0.13	7.67	0.1	0.0241	37.74	7.67	7.67	0.1	3R_23757144_23757196_FBgn0028475_-	AAGGTAAGT	GCTGATTGCAATTTTTCCAGCTC	11	4.76	52
3R_26056783_26056846_FBgn0039404_+	CG14543	0.03	0.02	0.12	0.13	5	0.1	0.004963	0.06	0.03	0.14	0.12	2.89	0.085	0.042159	43.75	5	2.89	0.1	3R_26056783_26056846_FBgn0039404_+	CAGGTTGTT	TCGGAGTGTCCGTTTTGTAGGTG	1.87	6.41	63
[truncated: 440 more rows]
